# Supplementary material for: Total synthesis and stereochemistry establishment of tumescenamide A
Source: Royal Society of Chemistry journal article supplement (doi:10.1039/d1qo01700d), 2022-01-01
Supplement: d1qo01700d1.pdf [file d1qo01700d1.pdf]

## Supporting Information

### Total Synthesis and Stereochemistry Establishment of Tumescenamide A

Hong Xue, Shiming Fan, Jingzhe Xu\*, Shouxin Liu\*

#### Tables

|                                                         |             |
|---------------------------------------------------------|-------------|
| <b>1. General Information.....</b>                      | <b>S2</b>   |
| <b>2. Synthesis Schemes and Tables.....</b>             | <b>S3</b>   |
| <b>3. Experimental Procedures.....</b>                  | <b>S7</b>   |
| <b>3.1 Preparation of Dmh.....</b>                      | <b>S7</b>   |
| <b>3.2 Preparation of dehydropeptides.....</b>          | <b>S8</b>   |
| <b>3.3 Preparation of cyclic peptides.....</b>          | <b>S9</b>   |
| <b>4. Data of Products.....</b>                         | <b>S12</b>  |
| <b>4.1 Data of Dmh.....</b>                             | <b>S12</b>  |
| <b>4.2 Data of dehydropeptides.....</b>                 | <b>S12</b>  |
| <b>4.3 Data of compound 1.....</b>                      | <b>S20</b>  |
| <b>4.4 Data of compound 38.....</b>                     | <b>S28</b>  |
| <b>4.5 Data of compound 39.....</b>                     | <b>S31</b>  |
| <b>4.6 Data of compound 40.....</b>                     | <b>S32</b>  |
| <b>5. NMR Comparison Tables of Tumescenamide A.....</b> | <b>S34</b>  |
| <b>6. NMR Comparison Tables of Tumescenamide C.....</b> | <b>S34</b>  |
| <b>7. NMR Spectra of Products.....</b>                  | <b>S38</b>  |
| <b>8. References.....</b>                               | <b>S157</b> |

## 1. General Information

Chemicals were purchased from commercial sources without further purification. The solvents were dried using standard conditions. Glassware was dried in oven and cooled before use.  $^1\text{H}$  NMR (500 MHz) and  $^{13}\text{C}$  NMR (125 MHz) spectras are recorded on a Bruker AV 500 spectrometer in  $\text{CDCl}_3$  and Acetone- $\text{d}_6$ . For  $^1\text{H}$  NMR (500 MHz),  $\text{CDCl}_3$  ( $\delta = 7.26$  ppm) and Acetone- $\text{d}_6$  ( $\delta = 2.05$  ppm) served as internal standard. The chemical shift ( $\delta$ ) of each signal is reported in parts per million (ppm) and all coupling constants (J) are reported in Hertz (Hz). The multiplicities of the signals are described using the following abbreviations: s = singlet, d = doublet, t = triplet, dd = doublet of doublets, m = multiplet, br = broad. For  $^{13}\text{C}$  NMR (125 MHz),  $\text{CDCl}_3$  ( $\delta = 77.16$  ppm) and Acetone- $\text{d}_6$  ( $\delta = 29.84$  ppm) served as internal standard. High-resolution Mass spectral (HRMS) datas were measured on a Bruker Apex II. Optical rotation was measured with a Anton Paar MCP 200. Analytical thin layer chromatography (TLC) was performed using silica gel plate (0.2 mm thickness), visualized using UV light and Phosphomolybdic acid staining solutions followed by heating. Column chromatography was carried out on silica gel (200-300 mesh).

## 2. Synthesis Schemes and Tables

**Scheme S1. Synthesis of 9b**

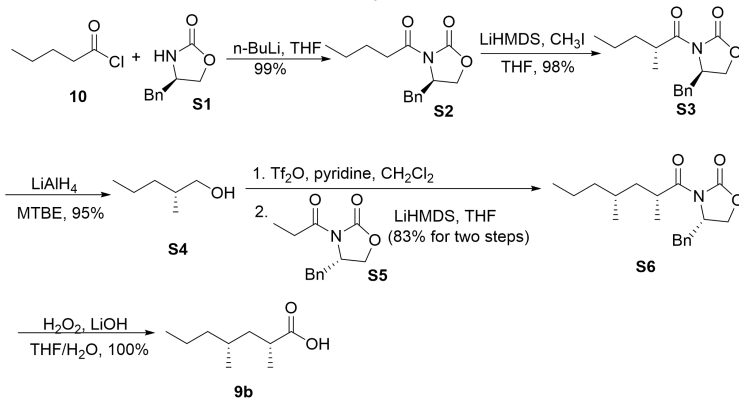

**Scheme S2. Synthesis of 9c**

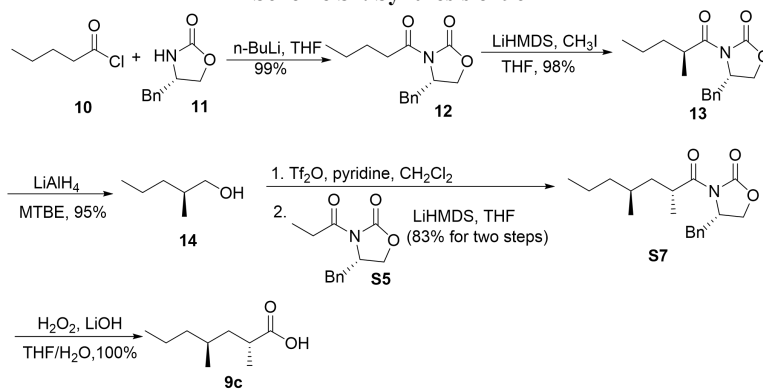

**Scheme S3. Synthesis of 9d**

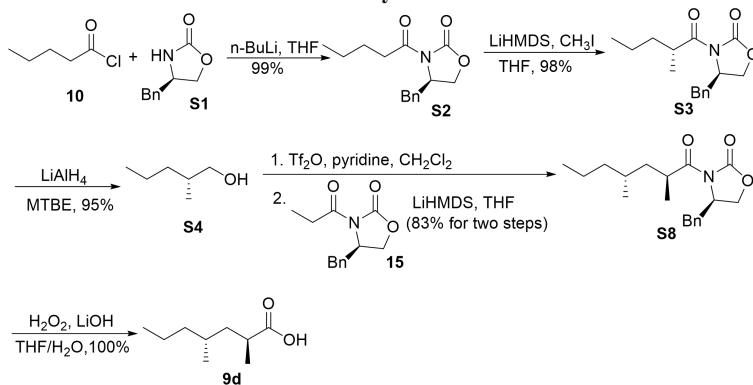

**Table S1.  $\beta$ -elimination of 19a<sup>1-4</sup>**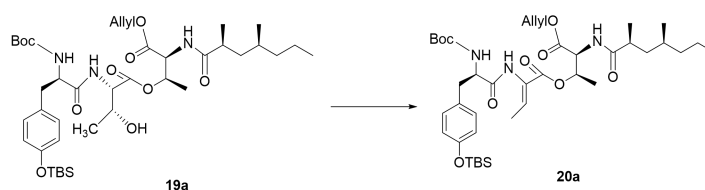

| Entry | Conditions                                                           | Yield(%) <sup>[a]</sup> |
|-------|----------------------------------------------------------------------|-------------------------|
| 1     | (Boc) <sub>2</sub> O, DMAP; then TMG                                 | decomposition           |
| 2     | EDC, CuCl <sub>2</sub>                                               | 15                      |
| 3     | TsCl, DMAP, DBU                                                      | 6                       |
| 4     | Et <sub>3</sub> N, MsCl                                              | 11                      |
| 5     | (Boc) <sub>2</sub> O, DMAP; then Nano K <sub>2</sub> CO <sub>3</sub> | 85                      |

[a] Isolated yields by column chromatography

**Table S2.  $\beta$ -Elimination reaction of threonine derivatives <sup>[a]</sup>**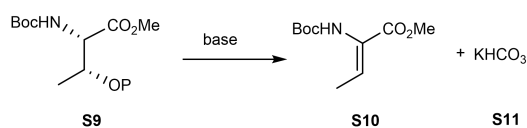

| Entry | P   | Base                                  | T (°C) | Solvent            | Yield (%) <sup>[b]</sup> |
|-------|-----|---------------------------------------|--------|--------------------|--------------------------|
| 1     | Cbz | Normal K <sub>2</sub> CO <sub>3</sub> | 25     | DMF                | 52                       |
| 2     | Cbz | Normal K <sub>2</sub> CO <sub>3</sub> | 65     | DMF                | 89                       |
| 3     | Cbz | Nano-K <sub>2</sub> CO <sub>3</sub>   | 25     | DMF                | 91                       |
| 4     | Boc | Normal K <sub>2</sub> CO <sub>3</sub> | 25     | DMF                | 4                        |
| 5     | Boc | Normal K <sub>2</sub> CO <sub>3</sub> | 65     | DMF                | 81                       |
| 6     | Boc | Nano-K <sub>2</sub> CO <sub>3</sub>   | 25     | DMF                | 88                       |
| 7     | Boc | Nano-K <sub>2</sub> CO <sub>3</sub>   | 25     | THF                | 73                       |
| 8     | Boc | Nano-K <sub>2</sub> CO <sub>3</sub>   | 25     | CH <sub>3</sub> CN | 93                       |

[a] Base (2 equiv), reaction time: 5h. [b] Isolated yields of compounds isolated after column chromatography.

**Scheme S4. One-pot synthesis of Boc- $\Delta$ Abu-OMe and Boc- $\Delta$ Ala-OMe**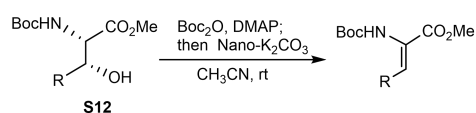

**S10** R = CH<sub>3</sub>, 84% yield on a 1g scale; 81% yield on a 100 g scale

**S13** R = H, 81% yield on a 1g scale; 78% yield on a 100 g scale



### Scheme S5. Synthesis of 1

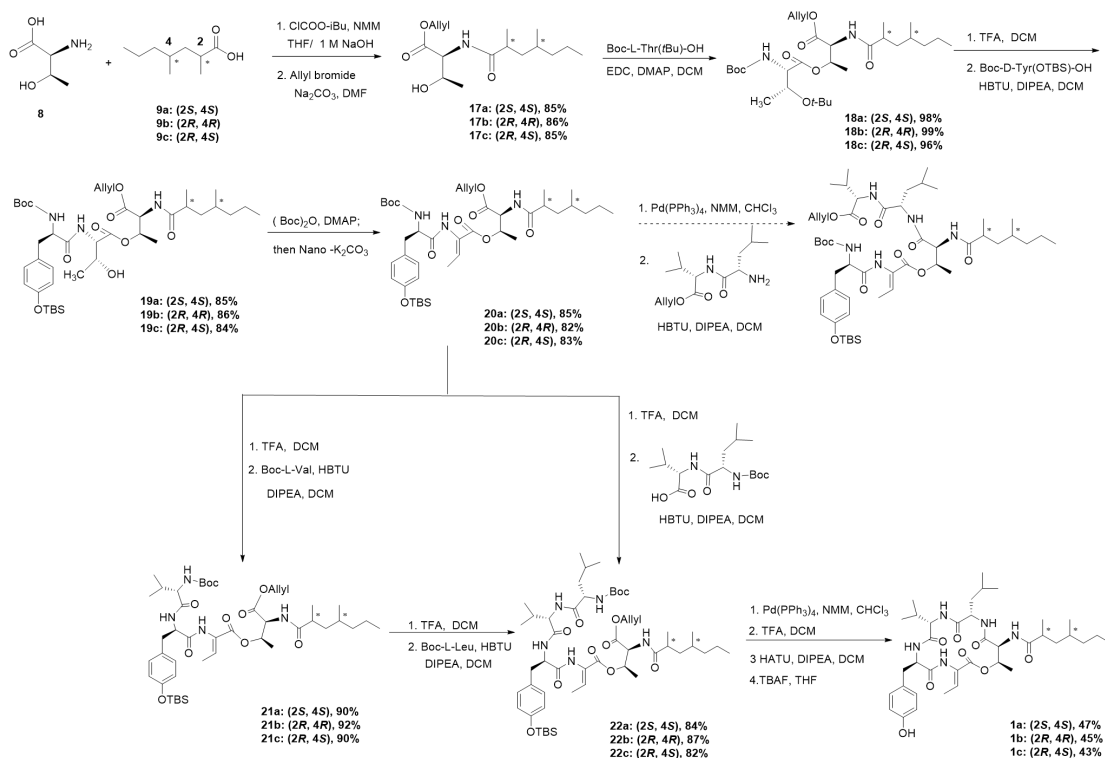

### Scheme S6. Synthesis of 38

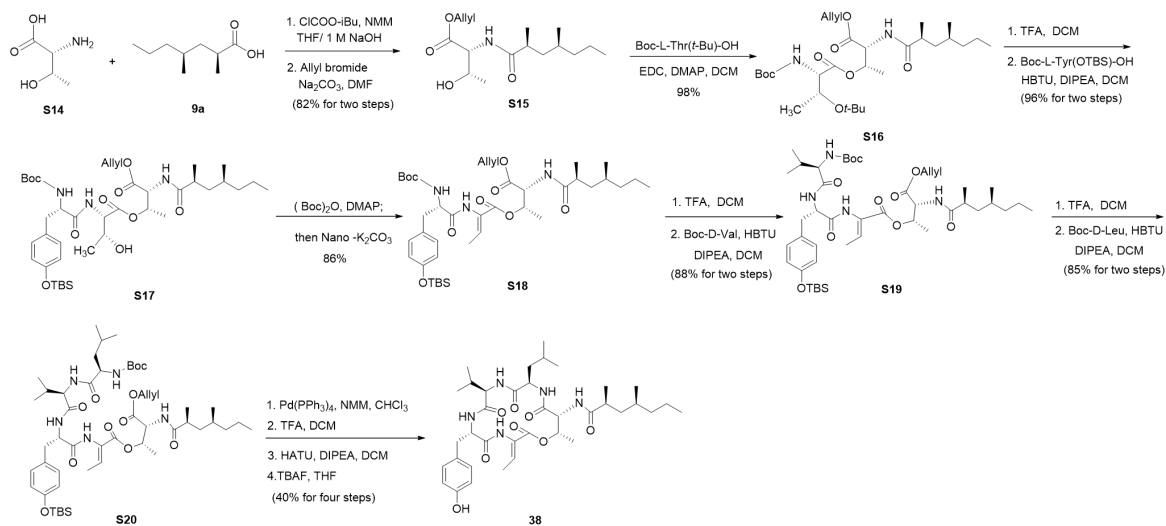

### Scheme S7. Synthesis of 39 and 40

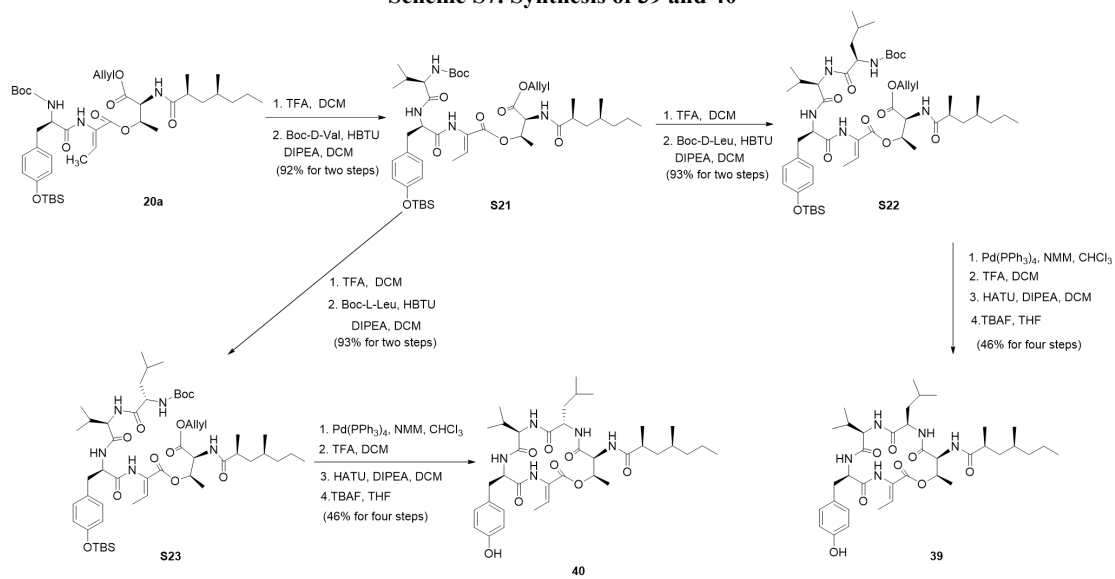

### 3. Experimental Procedures

#### 3.1 Preparation of Dmh

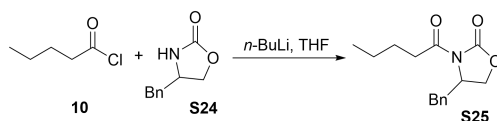

To a cooled (-78 °C) solution of 4-benzyl-2-oxazolidinone **S24** (17.72 g, 100.0 mmol) in THF (500 mL) was added *n*-BuLi (42.0 mL, 2.5 M, 105.0 mmol) dropwise over a 15 mins period. The resulting solution was allowed to stir at -78 °C for 15 mins and then treated with valeryl chloride **10** (12.46 mL, 105.0 mmol). After an additional 15 mins of stirring, the resulting cold (-78 °C) solution was allowed to warm to 25 °C and then quenched with aqueous NH<sub>4</sub>Cl. The layers were separated, and the aqueous phase was extracted with EtOAc (3 x 100 mL). The combined organic extracts were dried (MgSO<sub>4</sub>), concentrated in vacuo. The crude product was purified via flash chromatographed (SiO<sub>2</sub>, 5-10% gradient, EtOAc-hexane) to provide compound **S25**.

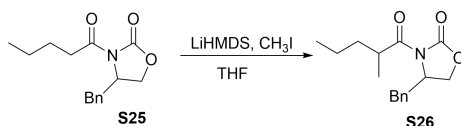

To a cooled (-78 °C) suspension of the imide **S25** (13.06 g, 50.0 mmol) in THF (200 mL) was added LiHMDS (60.0 mL, 60.0 mmol, 1 M) dropwise over a 30 mins period. After 1 h of stirring, the resulting cold (-78 °C) solution was treated with methyl iodide (3.70 mL, 60.0 mmol) and allowed to stir at -78 °C for 3 h before being warmed to 25 °C overnight. The reaction was quenched with aqueous NH<sub>4</sub>Cl (50 mL), and the aqueous layer was extracted with EtOAc (3 x 50 mL). The combined organic extracts were dried (MgSO<sub>4</sub>), concentrated in vacuo. The crude product was purified via flash chromatographed (SiO<sub>2</sub>, 5-15% gradient, EtOAc-hexane) to provide compound **S26**.

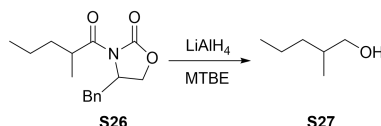

To a cooled (0 °C) suspension of compound **S26** (11.01 g, 40.0 mmol) in MTBE (50 mL) was added LiAlH<sub>4</sub> (2.28 g, 60.0 mmol) in small portions over a 15 mins period. After an additional 30 mins of stirring, the cold (0 °C) reaction was slowly quenched with brine (10 mL). MTBE (50 mL) was added to precipitate the aluminum salts, which were then filtered and dried (MgSO<sub>4</sub>), and the solution was concentrated in vacuo. The crude product was purified via flash chromatographed (SiO<sub>2</sub>, 15% MTBE-pentane) to provide compound **S27**.

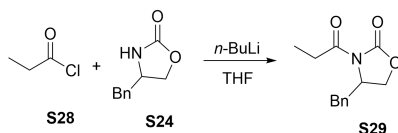

To a cooled (-78 °C) solution of 4-benzyl-2-oxazolidinone **S24** (17.72 g, 100.0 mmol) in THF (500 mL) was added *n*-BuLi (42.0 mL, 2.5 M, 105.0 mmol) dropwise over a 15 mins period. The resulting solution was allowed to stir at -78 °C for 15 mins and then treated with propionyl chloride **S28** (9.81 mL, 105.0 mmol). After an additional 15 mins of stirring, the resulting cold (-78 °C) solution was allowed to warm to

25 °C and then quenched with aqueous NH<sub>4</sub>Cl. The layers were separated, and the aqueous phase was extracted with EtOAc (3 x 100 mL). The combined organic extracts were dried (MgSO<sub>4</sub>), concentrated in vacuo. The crude product was purified via flash chromatography (SiO<sub>2</sub>, 5-10% gradient, EtOAc-hexane) to provide compound **S29**.

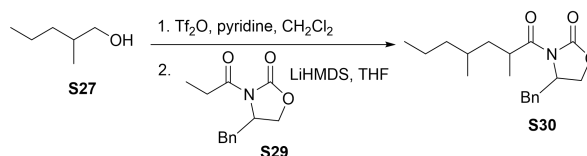

A stirred solution of compound **S27** (3.68 g, 36.0 mmol) in CH<sub>2</sub>Cl<sub>2</sub> (50 mL) under nitrogen atmosphere was cooled to -78 °C, to which pyridine (2.90 mL, 36.0 mmol) and Tf<sub>2</sub>O (6.06 mL, 36.0 mmol) were added. After being stirred for 50 mins at -78 °C, the reaction was quenched with aqueous NH<sub>4</sub>Cl (10 mL). The aqueous layer was extracted with CH<sub>2</sub>Cl<sub>2</sub> (20 mL), and the combined organic layers were dried (MgSO<sub>4</sub>) and concentrated in vacuo. The residue was used for the next step quickly.

A stirred solution of compound **S29** (6.99 g, 30.0 mmol) in THF (100 mL) under nitrogen atmosphere was cooled to -78 °C, to which LiHMDS (36.0 mL, 36.0 mmol, 1 M) was added. After being stirred for 30 mins at -78 °C, the obtained material in THF (5 mL) was added. The reaction mixture was warmed to 0 °C and stirred for 3 h, and then quenched with aqueous NH<sub>4</sub>Cl (15 mL). The aqueous layer was extracted with EtOAc (3 x 50 mL), and the combined organic layers were dried (MgSO<sub>4</sub>) and concentrated in vacuo. The crude product was purified via flash chromatography (SiO<sub>2</sub>, 10-15% gradient, EtOAc-hexane) to give compound **S30**.

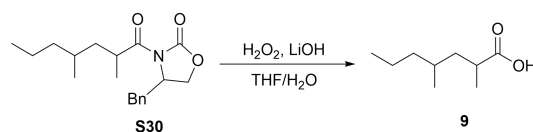

Compound **S30** (6.34 g, 20.0 mmol) was dissolved in 1:2 THF/water (200 mL) and cooled to 0 °C. To the resulting solution was added 30% aqueous H<sub>2</sub>O<sub>2</sub> (4.90 mL, 160.0 mmol) followed by LiOH (1.92 g, 80.0 mmol). The resulting mixture was stirred at 0 °C for 2 h. The reaction was slowly warmed to ambient temperature. THF was removed on a rotary evaporator. The aqueous solution was washed with EtOAc (20 mL). The solution was acidified with 2 M HCl to pH = 2 and extracted with EtOAc (3 x 50 mL). The extracts were combined, dried (MgSO<sub>4</sub>). The crude product was purified via flash chromatography (SiO<sub>2</sub>, 15-20% EtOAc-hexane) to give compound **9**.

### 3.2 Preparation of dehydropeptides

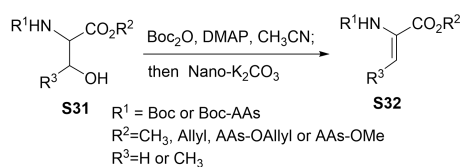

Compound **S31** (5.0 mmol) was dissolved in acetonitrile (5 mL), then DMAP (0.06 g, 0.5 mmol) and (Boc)<sub>2</sub>O (1.26 mL, 5.5 mmol) were added, the reaction mixture was stirred at room temperature for 2 h. Then nano-K<sub>2</sub>CO<sub>3</sub> (1.38 g, 10.0 mmol) was added, the reaction was stirred at room temperature for 5 h. The nano-K<sub>2</sub>CO<sub>3</sub> was recycled by filtration. The solvent was removed in vacuo and water was added. The aqueous solution was extracted with EtOAc (3 x 30 mL). The organics were combined and washed with 1 M KHSO<sub>4</sub> (2 x 20 mL), 1 M NaHCO<sub>3</sub> (2 x 20 mL), dried (MgSO<sub>4</sub>), concentrated in vacuo to give crude product. Pure product **S32** was obtained by recrystallization using EtOAc and n-hexane.

### 3.3 Preparation of cyclic peptides

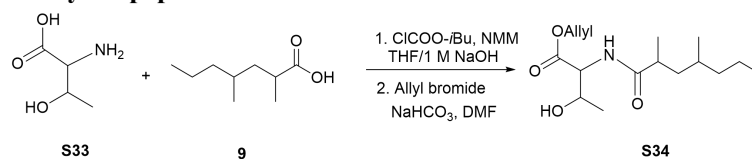

A stirred solution of compound **9** (1.58 g, 10.0 mmol) and 4-methylmorpholine (1.12 mL, 10.0 mmol) in THF (50 mL) was cooled to -10 °C. Isobutyl chloroformate (1.26 mL, 10.0 mmol) was added and the reaction was allowed to stir for 30 minutes. The reaction was allowed to warm to 0 °C at which time a solution of compound **S33** (1.43 g, 12.0 mmol) in 1 M NaOH (12 mL) was added. The reaction was allowed to warm to room temperature and stir for 24 hours at which time it was diluted with H<sub>2</sub>O (30 mL). The layers were separated and the aqueous layer was washed with EtOAc (2 x 50 mL). The combined organic layers were then extracted with saturated NaHCO<sub>3</sub> solution (3 x 50 mL). All aqueous layers were combined and acidified to pH = 2 with 1 M HCl and extracted with EtOAc (3 x 100 mL). The combined extractions were then dried (MgSO<sub>4</sub>) and concentrated to give the crude product as a colorless oil which was used without further purification for the next step.

Allyl bromide (1.04 mL, 12.0 mmol) was added to a stirred solution of the crude product and NaHCO<sub>3</sub> (1.68 g, 20.0 mmol) in DMF (30 mL). The reaction was stirred for 24 hours at which time it was diluted with H<sub>2</sub>O (50 mL). The aqueous layer was extracted with EtOAc (3 x 50 mL). The combined organic layers were then washed with H<sub>2</sub>O (2 x 20 mL), dried (MgSO<sub>4</sub>), and concentrated in vacuo. The crude product was purified by recrystallization using EtOAc and n-hexane to give compound **S34**.

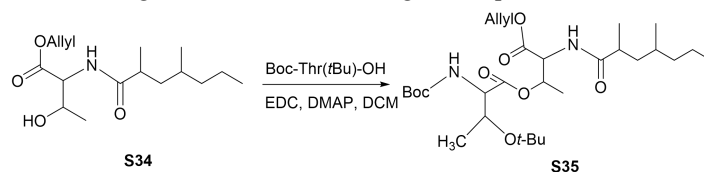

EDC (1.84 g, 9.6 mmol) and 4-dimethylaminopyridine (1.17 g, 9.6 mmol) were dissolved in CH<sub>2</sub>Cl<sub>2</sub> (50 mL). The solution was then added to a mixture of compound **S34** (2.39 g, 8.0 mmol) and Boc-Thr(*t*Bu)-OH (2.64 g, 9.6 mmol) in a reaction flask cooled to 0 °C. This reaction mixture was allowed to warm to room temperature and stir for 24 hours at which time it was diluted with CH<sub>2</sub>Cl<sub>2</sub> (50 mL) and washed with a saturated NaHCO<sub>3</sub> solution (3 x 10 mL). The combined aqueous layers were back extracted with CH<sub>2</sub>Cl<sub>2</sub> (2 x 10 mL). All organic layers were combined, dried (MgSO<sub>4</sub>), and concentrated in vacuo. The crude product was purified via flash chromatography (SiO<sub>2</sub>, 15% EtOAc-hexane) to give compound **S35**.

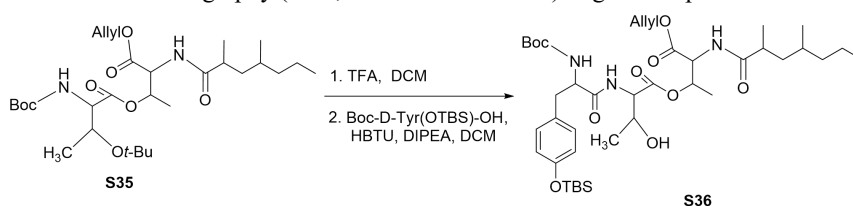

TFA (7.0 mL) was added to a stirred solution of compound **S35** (3.89 g, 7.0 mmol) in CH<sub>2</sub>Cl<sub>2</sub> (70 mL). Reaction was stirred at room temperature for 30 mins after which the solvent was removed under reduced pressure. The crude material was dissolved in CH<sub>2</sub>Cl<sub>2</sub> and concentrated three times to ensure all TFA was removed. The deprotected amine was used in the next reaction without further purification.

To a stirred solution of Boc-D-Tyr(OTBS)-OH (3.32 g, 8.4 mmol) in CH<sub>2</sub>Cl<sub>2</sub> (50 mL) were added HBTU (3.19 g, 8.4 mmol), the deprotected amine, and DIPEA (2.68 mL, 15.4 mmol) at room temperature. After being stirred at room temperature for 12 h, the reaction mixture was concentrated in vacuo and diluted with EtOAc (100 mL). The organic layer was washed with 1 M HCl (2 x 20 mL), saturated aqueous NaHCO<sub>3</sub> (2 x

20 mL), dried ( $\text{MgSO}_4$ ), and concentrated in vacuo. The residue was purified via flash chromatography ( $\text{SiO}_2$ , 20-30% EtOAc-hexane) to give compound **S36**.

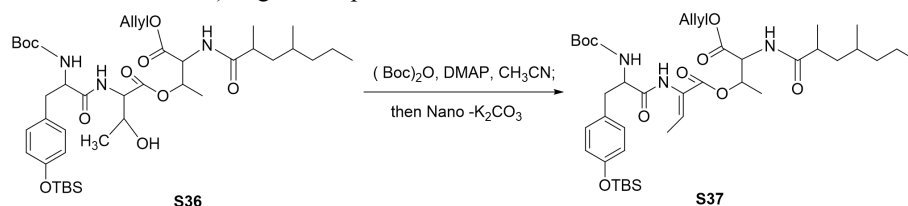

Compound **S36** (4.66 g, 6.0 mmol) was dissolved in acetonitrile (6 ml), then DMAP (0.07 g, 0.6 mmol) and  $(\text{Boc})_2\text{O}$  (1.52 mL, 6.6 mmol) were added, the reaction mixture was stirred at room temperature for 2 h. Then nano- $\text{K}_2\text{CO}_3$  (1.66 g, 12.0 mmol) was added, the reaction was stirred at room temperature for 5 h. The nano- $\text{K}_2\text{CO}_3$  was recycled by filtration. The solvent was removed in vacuo and water was added. The aqueous solution was extracted with EtOAc (3 x 30 mL). The organics were combined and washed with 1 M  $\text{KHSO}_4$  (2 x 20 mL), 1 M  $\text{NaHCO}_3$  (2 x 20 mL), dried ( $\text{MgSO}_4$ ), concentrated in vacuo to give crude product. Pure product **S37** was obtained by recrystallization using EtOAc and n-hexane.

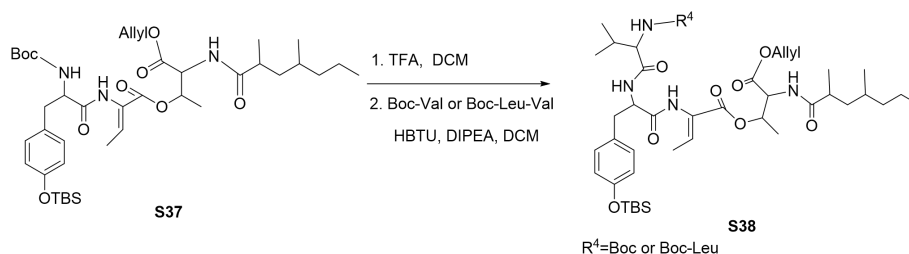

TFA (5 mL) was added to a stirred solution of compound **S37** (3.80 g, 5.0 mmol) in  $\text{CH}_2\text{Cl}_2$  (50 mL). Reaction was stirred at room temperature for 30 mins after which the solvent was removed under reduced pressure. The crude material was dissolved in  $\text{CH}_2\text{Cl}_2$  and concentrated three times to ensure all TFA was removed. The deprotected amine was used in the next reaction without further purification.

To a stirred solution of Boc-Val or Boc-Leu-Val (6 mmol) in  $\text{CH}_2\text{Cl}_2$  (30 mL) were added HBTU (2.28 g, 6 mmol), the deprotected amine, and DIPEA (1.92 mL, 11.0 mmol) at room temperature. After being stirred at room temperature for 12 h, the reaction mixture was concentrated in vacuo and diluted with EtOAc (100 mL). The organic layer was washed with 1 M HCl (2 x 20 mL), saturated aqueous  $\text{NaHCO}_3$  (2 x 20 mL), dried ( $\text{MgSO}_4$ ), and concentrated in vacuo. The residue was purified by recrystallization using EtOAc and n-hexane to give compound **S38**.

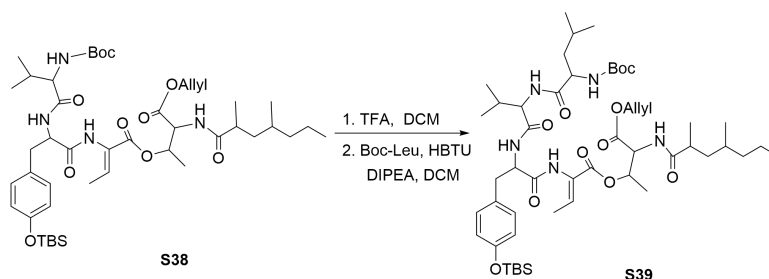

TFA (3 mL) was added to a stirred solution of compound **S38** (3.43 g, 4.0 mmol) in  $\text{CH}_2\text{Cl}_2$  (30 mL). Reaction was stirred at room temperature for 30 mins after which the solvent was removed under reduced pressure. The crude material was dissolved in  $\text{CH}_2\text{Cl}_2$  and concentrated three times to ensure all TFA was removed. The deprotected amine was used in the next reaction without further purification.

To a stirred solution of Boc-Leu (1.11 g, 4.8 mmol) in  $\text{CH}_2\text{Cl}_2$  (30 mL) were added HBTU (1.82 g, 4.8 mmol), the deprotected amine, and DIPEA (1.53 mL, 8.8 mmol) at room temperature. After being stirred at

room temperature for 12 h, the reaction mixture was concentrated in vacuo and diluted with EtOAc (100 mL). The organic layer was washed with 1 M HCl (2 x 20 mL), saturated aqueous NaHCO<sub>3</sub> (2 x 20 mL), dried (MgSO<sub>4</sub>), and concentrated in vacuo. The residue was purified by recrystallization using EtOAc and n-hexane to give compound **S39**.

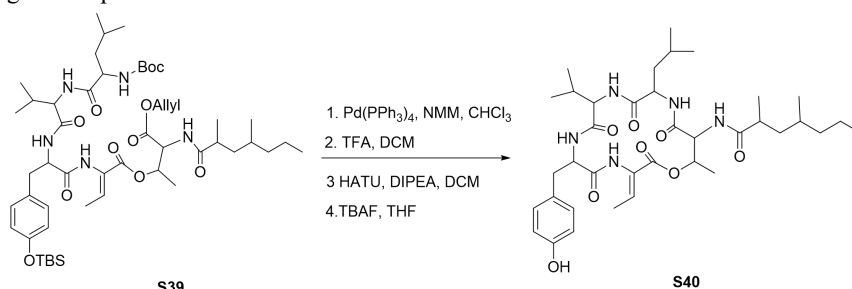

To a stirred solution of compound **S39** (485.8 mg, 0.5 mmol) in CHCl<sub>3</sub> (10 mL) were added 4-Methylmorpholine (331.6 μL, 3.0 mmol) and Pd(PPh<sub>3</sub>)<sub>4</sub> (231.1 mg, 0.2 mmol) at room temperature. After being stirred at the same temperature for 3 h, the reaction mixture was concentrated in vacuo, and the deprotected product was used for the next reaction without further purification.

To a stirred solution of the above crude product in CH<sub>2</sub>Cl<sub>2</sub> (5 mL) were added TFA (0.5 mL). Reaction was stirred at room temperature for 30 mins after which the solvent was removed under reduced pressure. The crude material was dissolved in CH<sub>2</sub>Cl<sub>2</sub> and concentrated three times to ensure all TFA was removed. The deprotected product was used in the next reaction without further purification.

To a stirred solution of the deprotected product in CH<sub>2</sub>Cl<sub>2</sub> (5 mL) were added HATU (228.1 mg, 0.6 mmol) and DIPEA (191.6 μL, 1.1 mmol) at room temperature. After being stirred at the same temperature for 12 h, the reaction mixture was concentrated in vacuo and diluted with EtOAc (10 mL). The organic layer was washed with 1 M HCl (2 x 2 mL), saturated aqueous NaHCO<sub>3</sub> (2 x 2 mL), dried (MgSO<sub>4</sub>), and concentrated in vacuo. The crude product was used without further purification for the next step.

To a stirred solution of the crude product in THF (3 mL) was added 1 M TBAF (0.6 mL, 0.6 mmol) at 0 °C. After being stirred at 0 °C to room temperature for 2 h, the reaction mixture was diluted with EtOAc (10 mL). The organic layer was washed with water, dried (MgSO<sub>4</sub>), and concentrated in vacuo. The residue was purified via flash chromatography (SiO<sub>2</sub>, 1-2% MeOH-CH<sub>2</sub>Cl<sub>2</sub>) to give compound **S40**

## 4. Data of Products

### 4.1 Data of Dmh

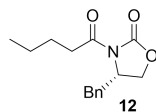

#### (S)-4-benzyl-3-pentanoyloxazolidin-2-one (12):

Colorless oil, 25.85 g, 99.0% yield.  $R_f$  = 0.5 (petroleum/EtOAc = 5:1);  $^1\text{H}$  NMR (500 MHz,  $\text{CDCl}_3$ )  $\delta$  7.39 (2H, t,  $J$  = 7.0 Hz), 7.35-7.32 (1H, m), 7.27 (2H, d,  $J$  = 7.0 Hz), 4.75-4.71 (1H, m), 4.27-4.21 (2H, m), 3.34 (1H, dd,  $J$  = 3.0, 13.0 Hz), 3.07-2.93 (2H, m), 2.83 (1H, dd,  $J$  = 9.5, 13.0 Hz), 1.79-1.70 (2H, m), 1.51-1.44 (2H, m), 1.02 (3H, t,  $J$  = 7.5 Hz);  $^{13}\text{C}$  NMR (125 MHz,  $\text{CDCl}_3$ )  $\delta$  173.55, 153.58, 135.48, 129.54, 129.06, 127.45, 66.27, 55.27, 38.07, 35.37, 26.49, 22.38, 13.96; HRMS (ESI)  $m/z$ :  $[\text{M} + \text{Na}]^+$  found for 284.1264, calcd for  $\text{C}_{15}\text{H}_{19}\text{NO}_3\text{Na}$  284.1263.

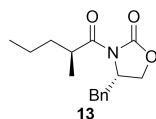

#### (S)-4-benzyl-3-((S)-2-methylpentanoyl)oxazolidin-2-one (13):

Yellow oil, 13.48 g, 98.0% yield;  $R_f$  = 0.6 (petroleum/EtOAc = 5:1);  $^1\text{H}$  NMR (500 MHz,  $\text{CDCl}_3$ )  $\delta$  7.33 (2H, t,  $J$  = 7.0 Hz), 7.29-7.26 (1H, m), 7.21 (2H, d,  $J$  = 7.5 Hz), 4.69-4.66 (1H, m), 4.21-4.16 (2H, m), 3.76-3.70 (1H, m), 3.27 (1H, dd,  $J$  = 2.5, 13.0 Hz), 2.77 (1H, dd,  $J$  = 9.5, 13.0 Hz), 1.76-1.69 (1H, m), 1.44-1.30 (3H, m), 1.22 (3H, d,  $J$  = 6.5 Hz), 0.91 (3H, t,  $J$  = 7.0 Hz);  $^{13}\text{C}$  NMR (125 MHz,  $\text{CDCl}_3$ )  $\delta$  177.51, 153.21, 135.51, 129.58, 129.06, 127.46, 66.15, 55.51, 38.07, 37.59, 35.72, 20.54, 17.43, 14.19; HRMS (ESI)  $m/z$ :  $[\text{M} + \text{Na}]^+$  found for 298.1420, calcd for  $\text{C}_{16}\text{H}_{21}\text{NO}_3\text{Na}$  298.1419.

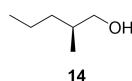

#### (S)-2-methylpentan-1-ol (14):

Colorless liquid, 3.88 g, 95.0% yield;  $R_f$  = 0.6 (petroleum/EtOAc = 3:1);  $^1\text{H}$  NMR (500 MHz,  $\text{CDCl}_3$ )  $\delta$  3.52-3.49 (1H, m), 3.43-3.39 (1H, m), 1.69-1.59 (2H, m), 1.42-1.33 (3H, m), 1.32-1.25 (2H, m), 1.12-1.06 (1H, m), 0.91-0.88 (6H, m);  $^{13}\text{C}$  NMR (125 MHz,  $\text{CDCl}_3$ )  $\delta$  68.50, 35.61, 35.54, 20.19, 16.65, 14.44; HRMS (ESI)  $m/z$ :  $[\text{M} + \text{H}]^+$  found for 103.1120, calcd for  $\text{C}_6\text{H}_{15}\text{O}$  103.1123.

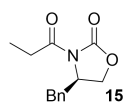

#### (R)-4-benzyl-3-propionylloxazolidin-2-one (15):

Colorless oil, 23.08 g, 99.0% yield.  $R_f$  = 0.6 (petroleum/EtOAc = 5:1);  $^1\text{H}$  NMR (500 MHz,  $\text{CDCl}_3$ )  $\delta$  7.33 (2H, t,  $J$  = 7.5 Hz), 7.29-7.26 (1H, m), 7.21 (2H, d,  $J$  = 7.5 Hz), 4.70-4.65 (1H, m), 4.22-4.15 (2H, m), 3.31 (1H, dd,  $J$  = 3.0, 13.5 Hz), 3.03-2.89 (2H, m), 2.78 (1H, dd,  $J$  = 9.5, 13.0 Hz), 1.21 (3H, t,  $J$  = 7.5 Hz);  $^{13}\text{C}$  NMR (125 MHz,  $\text{CDCl}_3$ )  $\delta$  174.21, 153.63, 135.46, 129.53, 129.07, 127.45, 66.34, 55.28, 38.05, 29.30, 8.42.

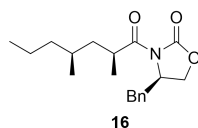

#### (R)-4-benzyl-3-((2S, 4S)-2, 4-dimethylheptanoyl)oxazolidin-2-one (16):

Colorless oil, 7.90 g, 83% yield;  $R_f$  = 0.5 (petroleum/EtOAc = 4:1);  $^1\text{H}$  NMR (500 MHz,  $\text{CDCl}_3$ )  $\delta$  7.34-7.30 (2H, m), 7.28-7.25 (1H, m), 7.21 (2H, d,  $J$  = 7.0 Hz), 4.71-4.66 (1H, m), 4.20-4.13 (2H, m), 3.98-3.91 (1H, m), 3.30



(1H, dd,  $J = 3.0, 13.0$  Hz), 2.75-2.70 (1H, m), 1.90-1.84 (1H, m), 1.50-1.42 (1H, m), 1.41-1.25 (3H, m), 1.22-1.19 (1H, m), 1.16 (3H, d,  $J = 7.0$  Hz), 1.14-1.08 (1H, m), 0.91 (3H, d,  $J = 6.5$  Hz), 0.89 (3H, t,  $J = 7.0$  Hz);  $^{13}\text{C}$  NMR (125 MHz,  $\text{CDCl}_3$ )  $\delta$  178.00, 153.17, 135.56, 129.59, 129.56, 129.07, 127.46, 66.09, 55.49, 41.01, 39.84, 38.19, 35.50, 30.33, 20.18, 19.25, 16.85, 14.43; HRMS (ESI)  $m/z$ :  $[\text{M} + \text{H}]^+$  found for 318.2071, calcd for  $\text{C}_{19}\text{H}_{28}\text{NO}_3$  318.2069.

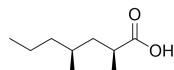

9a

**(2S, 4S)-2, 4-dimethylheptanoic acid (9a):**

Colorless oil, 3.16 g, quantitative;  $R_f = 0.6$  (petroleum/EtOAc = 4:1);  $[\alpha]_D^{20} +27.86$  (c 0.14,  $\text{CHCl}_3$ );  $^1\text{H}$  NMR (500 MHz,  $\text{CDCl}_3$ )  $\delta$  2.60-2.52 (1H, m), 1.76-1.70 (1H, m), 1.55-1.44 (1H, m), 1.40-1.32 (1H, m), 1.31-1.22 (2H, m), 1.18 (3H, d,  $J = 7.0$  Hz), 1.17-1.06 (2H, m), 0.90-0.86 (6H, m);  $^{13}\text{C}$  NMR (125 MHz,  $\text{CDCl}_3$ )  $\delta$  183.80, 41.37, 39.42, 37.46, 30.58, 19.99, 19.68, 17.94, 14.42; HRMS (ESI)  $m/z$ :  $[\text{M} + \text{H}]^+$  found for 159.1382, calcd for  $\text{C}_9\text{H}_{19}\text{O}_2$  159.1385.

The pure **9a** was analyzed by chiral HPLC (Chiralcel IG column,  $25^\circ\text{C}$ , 1.0 mL/min, n-hexane:isopropanol = 90:10). Elution time = 5.143 min, ee% > 99%.

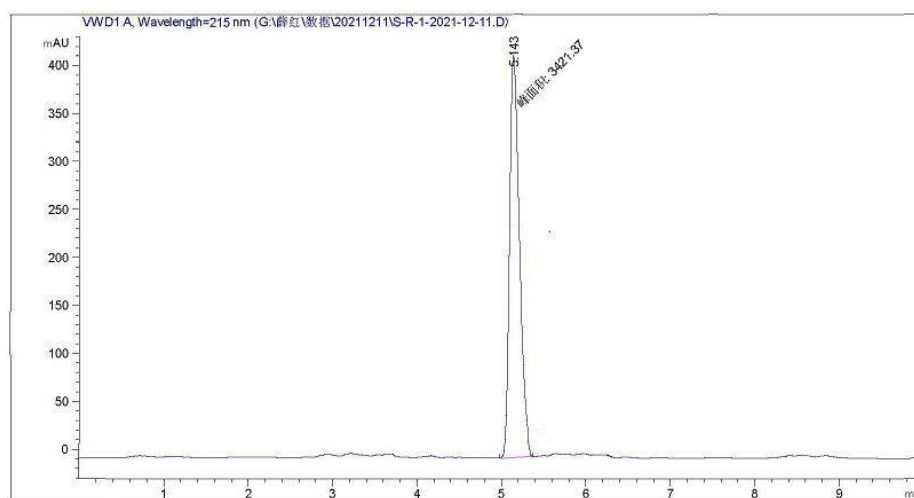

| 峰 # | 保留时间 [min] | 类型 | 峰宽 [min] | 峰面积 [mAU*s] | 峰高 [mAU]  | 峰面积 %    |
|-----|------------|----|----------|-------------|-----------|----------|
| 1   | 5.143      | MF | 0.1361   | 3421.37329  | 418.90640 | 100.0000 |

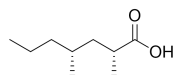

9b

**(2R, 4R)-2, 4-dimethylheptanoic acid (9b):**

Colorless oil, 3.16 g, quantitative;  $R_f = 0.6$  (petroleum/EtOAc = 4:1);  $[\alpha]_D^{20} -27.33$  (c 0.14,  $\text{CHCl}_3$ );  $^1\text{H}$  NMR (500 MHz,  $\text{CDCl}_3$ )  $\delta$  2.60-2.52 (1H, m), 1.76-1.70 (1H, m), 1.53-1.44 (1H, m), 1.40-1.31 (1H, m), 1.30-1.23 (2H, m), 1.18 (3H, d,  $J = 7.0$  Hz), 1.16-1.08 (2H, m), 0.90-0.86 (6H, m);  $^{13}\text{C}$  NMR (125 MHz,  $\text{CDCl}_3$ )  $\delta$  184.00, 41.36, 39.41, 37.47, 30.57, 19.98, 19.67, 17.93, 14.42; HRMS (ESI)  $m/z$ :  $[\text{M} + \text{H}]^+$  found for 159.1391, calcd for  $\text{C}_9\text{H}_{19}\text{O}_2$  159.1385.

The pure **9b** was analyzed by chiral HPLC (Chiralcel IG column,  $25^\circ\text{C}$ , 1.0 mL/min, n-hexane:isopropanol =

90:10). Elution time = 5.245 min, ee% > 99%.

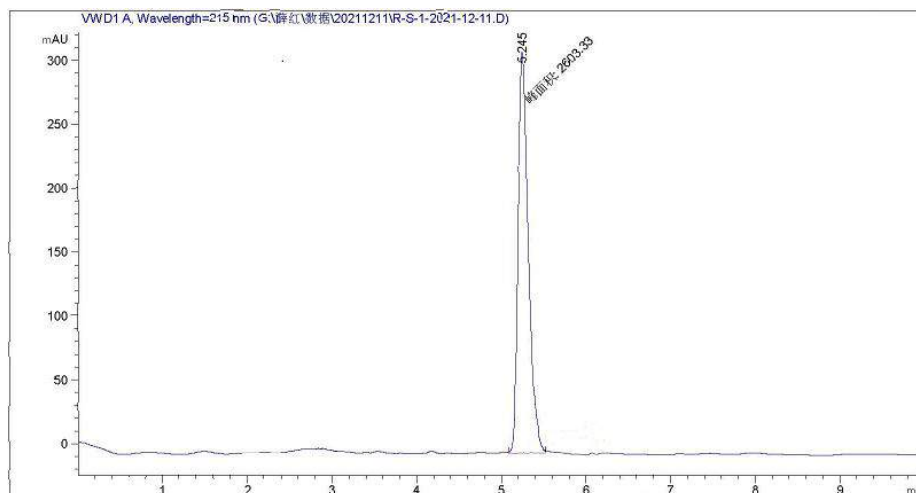

| 峰 # | 保留时间 [min] | 类型 | 峰宽 [min] | 峰面积 [mAU*s] | 峰高 [mAU]  | 峰面积 %    |
|-----|------------|----|----------|-------------|-----------|----------|
| 1   | 5.245      | MM | 0.1393   | 2603.32593  | 311.38516 | 100.0000 |

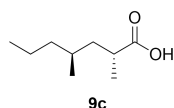

**(2R, 4S)-2, 4-dimethylheptanoic acid (9c):**

Colorless oil, 3.16 g, quantitative;  $R_f = 0.6$  (petroleum/EtOAc = 4:1);  $[\alpha]_D^{20} -12.71$  (c 0.14, CHCl<sub>3</sub>); <sup>1</sup>H NMR (500 MHz, CDCl<sub>3</sub>)  $\delta$  2.58-2.50 (1H, m), 1.57-1.46 (2H, m), 1.40-1.33 (2H, m), 1.32-1.25 (2H, m), 1.15 (3H, d,  $J = 7.0$  Hz), 1.13-1.09 (1H, m), 0.89-0.85 (6H, m); <sup>13</sup>C NMR (125 MHz, CDCl<sub>3</sub>)  $\delta$  183.86, 40.95, 39.44, 37.30, 30.33, 20.08, 19.44, 16.97, 14.42; HRMS (ESI)  $m/z$ :  $[M + H]^+$  found for 159.1393, calcd for C<sub>9</sub>H<sub>19</sub>O<sub>2</sub> 159.1385.

The pure **9c** was analyzed by chiral HPLC (Chiralcel IG column, 25°C, 1.0 mL/min, n-hexane:isopropanol = 90:10). Elution time = 3.821 min, ee% > 99%.

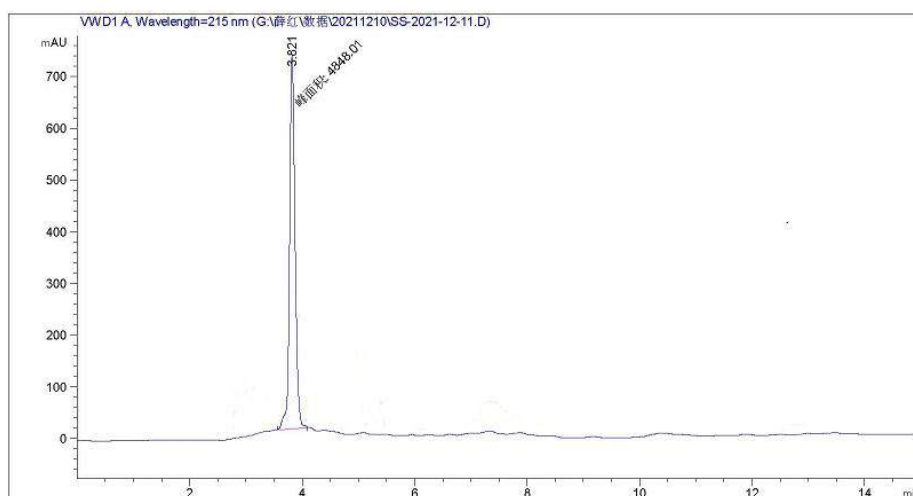

| 峰 # | 保留时间 [min] | 类型 | 峰宽 [min] | 峰面积 [mAU*s] | 峰高 [mAU]  | 峰面积 %    |
|-----|------------|----|----------|-------------|-----------|----------|
| 1   | 3.821      | MM | 0.1117   | 4848.01416  | 723.32825 | 100.0000 |

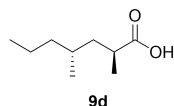

**(2S, 4R)-2, 4-dimethylheptanoic acid (9d):**

Colorless oil, 3.16 g, quantitative;  $R_f = 0.6$  (petroleum/EtOAc = 4:1);  $[\alpha]_D^{20} +13.17$  (c 0.14, CHCl<sub>3</sub>); The data of <sup>1</sup>H NMR and <sup>13</sup>C NMR are in the agreement with the reported data.<sup>6</sup>

The pure **9d** was analyzed by chiral HPLC (Chiralcel IG column, 25°C, 1.0 mL/min, n-hexane:isopropanol = 90:10). Elution time = 3.666 min, ee% > 99%.

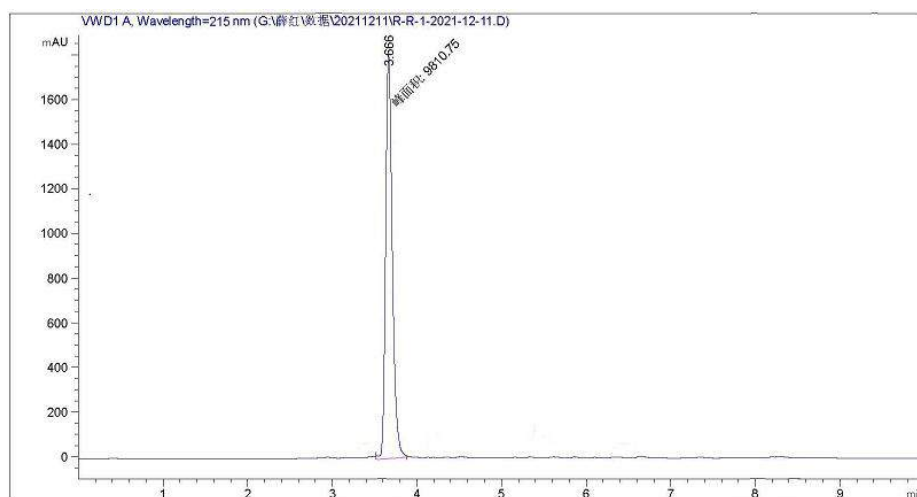

| 峰 # | 保留时间 [min] | 类型 | 峰宽 [min] | 峰面积 [mAU*s] | 峰高 [mAU]   | 峰面积 %    |
|-----|------------|----|----------|-------------|------------|----------|
| 1   | 3.666      | MM | 0.0903   | 9810.75293  | 1811.06958 | 100.0000 |

**4.2 Data of dehydropeptides**

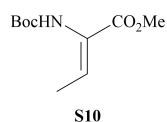

**methyl (Z)-2-((tert-butoxycarbonyl)amino)but-2-enoate (S10):**

White solid, 0.90 g, 84% yield;  $R_f = 0.4$  (petroleum/EtOAc = 4:1); <sup>1</sup>H NMR (500 MHz, CDCl<sub>3</sub>) δ 6.68 (1H, q,  $J = 7.0$  Hz), 5.98 (1H, br), 3.77 (3H, s), 1.81 (3H, d,  $J = 7.0$  Hz), 1.47 (9H, s); <sup>13</sup>C NMR (125 MHz, CDCl<sub>3</sub>) δ 165.45, 153.25, 132.18, 80.54, 52.34, 28.29, 14.34; HRMS (ESI)  $m/z$ :  $[M + H]^+$  found for 216.1238, calcd for C<sub>10</sub>H<sub>18</sub>NO<sub>4</sub> 216.1236.

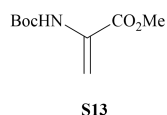

**methyl 2-((*tert*-butoxycarbonyl)amino)acrylate (S13):**

White solid, 0.81 g, 81% yield;  $R_f = 0.5$  (petroleum/EtOAc = 4:1);  $^1\text{H NMR}$  (500 MHz,  $\text{CD}_3\text{OD}$ )  $\delta$  6.01 (1H, br), 5.67 (1H, s), 4.72 (1H, s), 3.81 (3H, s), 1.48 (9H, s);  $^{13}\text{C NMR}$  (125 MHz,  $\text{CDCl}_3$ )  $\delta$  164.61, 152.71, 131.43, 105.32, 80.85, 53.02, 28.40; HRMS (ESI)  $m/z$ :  $[\text{M} + \text{H}]^+$  found for 202.1073, calcd for  $\text{C}_9\text{H}_{16}\text{NO}_4$  202.1079.

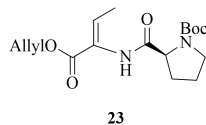

***tert*-butyl (*S, Z*)-2-((1-(allyloxy)-1-oxobut-2-en-2-yl)carbamoyl)pyrrolidine-1-carboxylate (23):**

White solid, 1.40 g, 83% yield;  $R_f = 0.3$  (petroleum/EtOAc = 5:1);  $^1\text{H NMR}$  (500 MHz,  $\text{CDCl}_3$ )  $\delta$  6.82 (1H, d,  $J = 45.0$  Hz), 5.96-5.89 (1H, m), 5.33 (1H, d,  $J = 17.0$  Hz), 5.24 (1H, d,  $J = 10.5$  Hz), 4.69-4.62 (2H, m), 4.38 (1H, d,  $J = 40.5$  Hz), 3.51-3.37 (2H, m), 2.37-1.93 (5H, m), 1.78 (3H, d,  $J = 6.5$  Hz), 1.48 (9H, s);  $^{13}\text{C NMR}$  (125 MHz,  $\text{CDCl}_3$ )  $\delta$  171.25, 164.01, 155.97, 134.65, 132.04, 126.70, 118.76, 80.91, 65.86, 61.56, 47.23, 31.43, 28.43, 24.68, 14.82; HRMS (ESI)  $m/z$ :  $[\text{M} + \text{H}]^+$  found for 339.1921, calcd for  $\text{C}_{17}\text{H}_{27}\text{N}_2\text{O}_5$  339.1920.

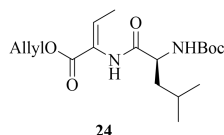

**allyl (*S, Z*)-2-((*tert*-butoxycarbonyl)amino)-4-methylpentanamido)but-2-enoate (24):**

White solid, 1.58 g, 89% yield;  $R_f = 0.2$  (petroleum/EtOAc = 5:1);  $^1\text{H NMR}$  (500 MHz,  $\text{CDCl}_3$ )  $\delta$  7.41 (1H, br), 6.86 (1H, q,  $J = 7.0$  Hz), 5.96-5.88 (1H, m), 5.33 (1H, d,  $J = 17.0$  Hz), 5.25 (1H, d,  $J = 10.0$  Hz), 5.02 (1H, s), 4.66 (2H, d,  $J = 5.5$  Hz), 4.22 (1H, s), 2.05 (1H, s), 1.78 (3H, d,  $J = 7.5$  Hz), 1.74 (1H, s), 1.45 (9H, s), 1.26 (1H, s), 0.97-0.92 (6H, m);  $^{13}\text{C NMR}$  (125 MHz,  $\text{CDCl}_3$ )  $\delta$  171.12, 164.07, 155.93, 134.58, 131.97, 126.08, 118.61, 80.36, 65.99, 53.35, 41.09, 28.39, 24.84, 23.03, 22.15, 14.65; HRMS (ESI)  $m/z$ :  $[\text{M} + \text{H}]^+$  found for 355.2230, calcd for  $\text{C}_{18}\text{H}_{31}\text{N}_2\text{O}_5$  355.2233.

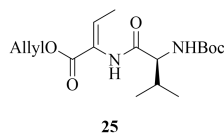

**allyl (*S, Z*)-2-((*tert*-butoxycarbonyl)amino)-3-methylbutanamido)but-2-enoate (25):**

White solid, 1.33 g, 78% yield;  $R_f = 0.3$  (petroleum/EtOAc = 5:1);  $^1\text{H NMR}$  (500 MHz,  $\text{CDCl}_3$ )  $\delta$  7.73 (1H, br), 6.84 (1H, q,  $J = 7.0$  Hz), 5.94-5.89 (1H, m), 5.32 (1H, d,  $J = 17.0$  Hz), 5.23 (2H, d,  $J = 10.0$  Hz), 4.64 (2H, d,  $J = 5.5$  Hz), 4.12 (1H, s), 2.20 (1H, s), 1.76 (3H, d,  $J = 7.0$  Hz), 1.44 (9H, s), 1.03 (3H, d,  $J = 6.5$  Hz), 0.98 (3H, d,  $J = 6.5$  Hz);  $^{13}\text{C NMR}$  (125 MHz,  $\text{CDCl}_3$ )  $\delta$  170.51, 164.01, 156.05, 134.73, 131.90, 126.21, 118.57, 79.99, 65.93, 60.04, 30.94, 28.33, 19.35, 17.90, 14.53; HRMS (ESI)  $m/z$ :  $[\text{M} + \text{H}]^+$  found for 341.2077, calcd for  $\text{C}_{17}\text{H}_{29}\text{N}_2\text{O}_5$  341.2076.

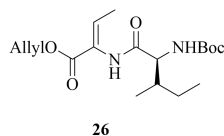

**allyl (*Z*)-2-((2*S*, 3*S*)-2-((*tert*-butoxycarbonyl)amino)-3-methylpentanamido)but-2-enoate (26):**

White solid, 1.31 g, 74% yield;  $R_f = 0.3$  (petroleum/EtOAc = 5:1);  $^1\text{H NMR}$  (500 MHz,  $\text{CDCl}_3$ )  $\delta$  6.83 (1H, br), 5.95-5.87 (1H, m), 5.34 (1H, d,  $J = 17.0$  Hz), 5.26 (1H, d,  $J = 10.0$  Hz), 4.94 (1H, d,  $J = 6.5$  Hz), 4.66 (2H, t,  $J = 5.0$  Hz), 4.63 (1H, dd,  $J = 1.5, 9.0$  Hz), 4.39 (1H, s), 4.21-4.18 (1H, m), 2.10-2.05 (1H, m), 1.63 (1H, s), 1.46 (9H, s), 1.24 (3H, d,  $J = 6.5$  Hz), 0.95 (3H, t,  $J = 7.5$  Hz), 0.89 (3H, d,  $J = 7.0$  Hz);  $^{13}\text{C NMR}$  (125 MHz,  $\text{CDCl}_3$ )  $\delta$  170.50, 164.11, 156.03, 134.80, 131.93, 125.93, 118.73, 80.28, 66.07, 58.54, 37.18, 28.39, 26.48, 14.83, 14.42, 11.82; HRMS (ESI)  $m/z$ :  $[\text{M} + \text{H}]^+$  found for 355.2236, calcd for  $\text{C}_{18}\text{H}_{31}\text{N}_2\text{O}_5$  355.2233.

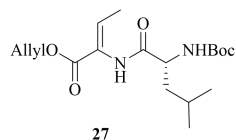

**allyl (*R*, *Z*)-2-((2-((*tert*-butoxycarbonyl)amino)-4-methylpentanamido)but-2-enoate (27):**

White solid, 1.35 g, 76% yield;  $R_f = 0.2$  (petroleum/EtOAc = 5:1);  $^1\text{H NMR}$  (500 MHz,  $\text{CDCl}_3$ )  $\delta$  7.48 (1H, br), 6.84 (1H, q,  $J = 7.5$  Hz), 5.96-5.88 (1H, m), 5.33 (1H, dd,  $J = 1.5, 17.0$  Hz), 5.24 (1H, d,  $J = 10.5$  Hz), 4.90 (1H, s), 4.66 (2H, d,  $J = 5.5$  Hz), 4.22 (1H, s), 1.77 (3H, d,  $J = 7.0$  Hz), 1.66 (1H, s), 1.57 (1H, d,  $J = 6.0$  Hz), 1.45 (9H, s), 1.21 (1H, s), 0.96 (6H, t,  $J = 6.5$  Hz);  $^{13}\text{C NMR}$  (125 MHz,  $\text{CDCl}_3$ )  $\delta$  171.12, 164.06, 155.92, 134.57, 131.96, 126.07, 118.60, 80.35, 65.98, 53.34, 41.08, 28.38, 24.83, 23.02, 22.14, 14.64; HRMS (ESI)  $m/z$ :  $[\text{M} + \text{H}]^+$  found for 355.2233, calcd for  $\text{C}_{18}\text{H}_{31}\text{N}_2\text{O}_5$  355.2233.

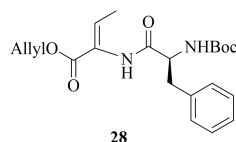

**allyl (*S*, *Z*)-2-((2-((*tert*-butoxycarbonyl)amino)-3-phenylpropanamido)but-2-enoate (28):**

White solid, 1.57 g, 81% yield;  $R_f = 0.4$  (petroleum/EtOAc = 1:1);  $^1\text{H NMR}$  (500 MHz,  $\text{CD}_2\text{Cl}_2$ )  $\delta$  7.31-7.28 (2H, m), 7.25-7.20 (3H, m), 6.77 (1H, q,  $J = 7.0$  Hz), 5.97-5.89 (1H, m), 5.34-5.30 (1H, m), 5.23 (1H, dd,  $J = 1.0, 10.5$  Hz), 4.63 (2H, d,  $J = 5.5$  Hz), 4.47 (1H, s), 3.20-3.16 (1H, m), 3.02-2.98 (1H, m), 1.67 (3H, d,  $J = 6.5$  Hz), 1.43 (1H, s), 1.39 (1H, s), 1.38 (9H, s);  $^{13}\text{C NMR}$  (125 MHz,  $\text{CDCl}_3$ )  $\delta$  169.72, 164.63, 155.55, 136.45, 134.54, 129.40, 128.69, 126.99, 125.75, 80.38, 70.26, 55.90, 52.31, 38.63, 28.24, 14.55; HRMS (ESI)  $m/z$ :  $[\text{M} + \text{H}]^+$  found for 389.2073, calcd for  $\text{C}_{21}\text{H}_{29}\text{N}_2\text{O}_5$  389.2076.

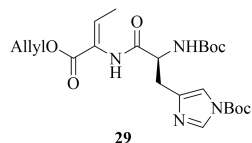

**allyl (*S*, *Z*)-2-((2-((*tert*-butoxycarbonyl)amino)-3-(1*H*-imidazol-4-yl)propanamido)but-2-enoate (29):**

White solid, 1.63 g, 86% yield;  $R_f = 0.2$  (petroleum/EtOAc = 3:1);  $^1\text{H NMR}$  (500 MHz,  $\text{CDCl}_3$ )  $\delta$  7.83 (1H, s), 7.26 (1H, q,  $J = 7.0$  Hz), 7.20 (1H, s), 7.07 (1H, s), 5.87-5.79 (1H, m), 5.24 (1H, d,  $J = 5.5$  Hz), 5.16 (1H, d,  $J = 10.0$  Hz), 4.67 (1H, d,  $J = 5.0$  Hz), 4.59 (2H, s), 3.51-3.46 (1H, m), 3.26 (1H, d,  $J = 14.5$  Hz), 1.67 (3H, d,  $J = 6.5$  Hz), 1.52 (9H, s), 1.51 (9H, s), 1.41-1.34 (2H, m);  $^{13}\text{C NMR}$  (125 MHz,  $\text{CDCl}_3$ )  $\delta$  169.44, 161.82, 150.61, 148.62, 144.74, 137.20, 136.64, 131.71, 122.61, 118.71, 115.55, 85.90, 84.52, 66.35, 59.34, 28.16, 27.99, 27.85, 13.98; HRMS (ESI)  $m/z$ :  $[\text{M} + \text{H}]^+$  found for 479.2508, calcd for  $\text{C}_{23}\text{H}_{35}\text{N}_4\text{O}_7$  479.2506.

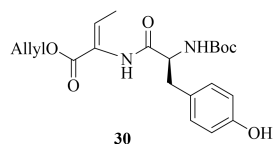

**allyl (S, Z)-2-(2-((tert-butoxycarbonyl)amino)-3-(4-hydroxyphenyl)propanamido)but-2-enoate (30):**

White solid, 1.64 g, 81% yield;  $R_f = 0.3$  (petroleum/EtOAc = 2:1);  $^1\text{H NMR}$  (500 MHz,  $\text{CDCl}_3$ )  $\delta$  7.04 (2H, d,  $J = 8.5$  Hz), 6.73 (2H, d,  $J = 8.5$  Hz), 6.07 (1H, br), 5.93-5.85 (1H, m), 5.33 (1H, d,  $J = 17.0$  Hz), 5.25 (1H, d,  $J = 10.5$  Hz), 5.14 (1H, s), 4.63 (1H, d,  $J = 4.5$  Hz), 4.56 (1H, d,  $J = 7.0$  Hz), 4.35-4.29 (1H, m), 2.99 (2H, t,  $J = 8.0$  Hz), 2.81 (1H, s), 1.75 (1H, s), 1.41 (9H, s), 1.16 (3H, d,  $J = 6.0$  Hz);  $^{13}\text{C NMR}$  (125 MHz,  $\text{CDCl}_3$ )  $\delta$  169.71, 163.92, 151.95, 150.20, 134.85, 134.03, 131.96, 130.48, 125.88, 121.59, 118.65, 83.69, 66.03, 55.87, 37.24, 28.36, 27.81, 14.70; HRMS (ESI)  $m/z$ :  $[\text{M} + \text{H}]^+$  found for 405.2028, calcd for  $\text{C}_{21}\text{H}_{29}\text{N}_2\text{O}_6$  405.2026.

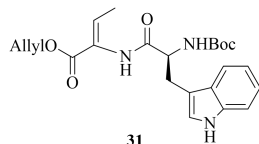**allyl (S, Z)-2-(2-((tert-butoxycarbonyl)amino)-3-(1H-indol-3-yl)propanamido)but-2-enoate (31):**

White solid, 1.88 g, 88% yield;  $R_f = 0.3$  (petroleum/EtOAc = 1:1);  $^1\text{H NMR}$  (500 MHz,  $\text{CDCl}_3$ )  $\delta$  8.10 (1H, br), 7.68 (1H, d,  $J = 7.5$  Hz), 7.36 (1H, d,  $J = 8.0$  Hz), 7.29 (1H, s), 7.21 (1H, t,  $J = 7.0$  Hz), 7.15-7.12 (2H, m), 6.80 (1H, q,  $J = 7.0$  Hz), 5.93-5.85 (1H, m), 5.31 (1H, d,  $J = 17.0$  Hz), 5.23 (1H, d,  $J = 10.5$  Hz), 5.13 (1H, s), 4.60 (3H, d,  $J = 5.5$  Hz), 1.68-1.66 (3H, m), 1.42 (9H, s);  $^{13}\text{C NMR}$  (125 MHz,  $\text{CDCl}_3$ )  $\delta$  170.26, 170.14, 163.95, 136.34, 134.63, 132.01, 129.02, 127.67, 125.91, 123.50, 122.44, 119.96, 119.00, 118.59, 111.32, 65.99, 61.79, 55.44, 29.84, 28.40, 14.72; HRMS (ESI)  $m/z$ :  $[\text{M} + \text{H}]^+$  found for 428.2158, calcd for  $\text{C}_{23}\text{H}_{30}\text{N}_3\text{O}_5$  428.2158.

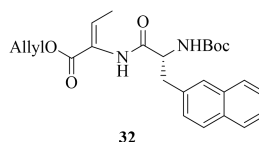**allyl (R, Z)-2-(2-((tert-butoxycarbonyl)amino)-3-(naphthalen-2-yl)propanamido)but-2-enoate (32):**

White solid, 1.88 g, 86% yield;  $R_f = 0.4$  (petroleum/EtOAc = 1:1);  $^1\text{H NMR}$  (500 MHz,  $\text{CDCl}_3$ )  $\delta$  7.78-7.74 (3H, m), 7.72-7.70 (1H, m), 7.59 (1H, s), 7.46-7.42 (3H, m), 7.20 (1H, dd,  $J = 1.0, 8.0$  Hz), 7.05 (1H, q,  $J = 7.0$  Hz), 5.90-5.82 (1H, m), 5.29-5.21 (2H, m), 4.90 (1H, dd,  $J = 2.5, 5.0$  Hz), 4.62 (2H, t,  $J = 7.0$  Hz), 3.79-3.75 (1H, m), 3.51-3.48 (1H, m), 1.67 (9H, s), 0.64 (3H, d,  $J = 7.5$  Hz);  $^{13}\text{C NMR}$  (125 MHz,  $\text{CDCl}_3$ )  $\delta$  171.28, 169.08, 161.54, 149.97, 148.87, 144.53, 133.51, 131.60, 129.25, 127.82, 127.66, 126.48, 122.20, 118.73, 84.88, 66.31, 61.02, 60.52, 34.97, 28.24, 21.18, 14.31, 13.07; HRMS (ESI)  $m/z$ :  $[\text{M} + \text{H}]^+$  found for 439.2231, calcd for  $\text{C}_{25}\text{H}_{31}\text{N}_2\text{O}_5$  439.2233.

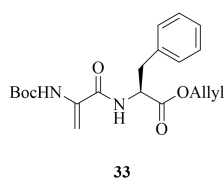**allyl (2-((tert-butoxycarbonyl)amino)acryloyl)-L-phenylalaninate (33):**

White solid, 1.53 g, 82% yield;  $R_f = 0.4$  (petroleum/EtOAc = 1:1);  $^1\text{H NMR}$  (500 MHz,  $\text{CDCl}_3$ )  $\delta$  8.37 (1H, br), 7.28-7.25 (2H, m), 7.20-7.19 (3H, m), 6.62 (1H, s), 5.93-5.86 (2H, m), 5.43 (1H, s), 5.31 (1H, dd,  $J = 1.0, 17.0$  Hz), 5.26-5.24 (1H, m), 4.65 (2H, d,  $J = 5.5$  Hz), 4.52 (1H, s), 3.20-3.16 (1H, m), 3.04 (1H, s), 1.38 (9H, s);  $^{13}\text{C NMR}$  (125 MHz,  $\text{CDCl}_3$ )  $\delta$  170.18, 162.82, 136.22, 130.96, 130.43, 128.82, 128.22, 126.50, 118.45, 109.02, 66.03, 37.66, 27.80; HRMS (ESI)  $m/z$ :  $[\text{M} + \text{H}]^+$  found for 375.1917, calcd for  $\text{C}_{20}\text{H}_{27}\text{N}_2\text{O}_5$  375.1920.

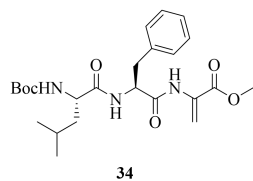

**methyl (6*S*, 9*S*)-9-benzyl-6-isobutyl-2, 2-dimethyl-12-methylene-4, 7, 10-trioxo-3-oxa-5, 8, 11-triazatridecan-13-oate (34):**

White solid, 1.85 g, 80% yield;  $R_f$  = 0.2 (petroleum/EtOAc = 1:1);  $^1\text{H}$  NMR (500 MHz,  $\text{CDCl}_3$ )  $\delta$  8.19 (1H, br), 7.28-7.25 (2H, m), 7.23-7.18 (4H, m), 7.00 (1H, br), 6.53 (1H, s), 5.88 (1H, s), 5.07 (1H, s), 4.84-4.77 (1H, m), 3.77 (3H, s), 3.14-3.08 (2H, m), 1.64-1.55 (2H, m), 1.46 (1H, s), 1.42 (9H, s), 0.90 (6H, d,  $J$  = 6.5 Hz);  $^{13}\text{C}$  NMR (125 MHz,  $\text{CDCl}_3$ )  $\delta$  169.70, 163.84, 155.68, 136.17, 130.80, 129.26, 128.64, 127.02, 109.83, 60.40, 55.06, 52.87, 41.21, 38.16, 28.29, 27.67, 24.70, 22.94; HRMS (ESI)  $m/z$ :  $[\text{M} + \text{H}]^+$  found for 462.2067, calcd for  $\text{C}_{24}\text{H}_{36}\text{N}_3\text{O}_6$  462.2064.

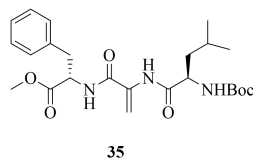

**methyl (2-((*R*)-2-((*tert*-butoxycarbonyl)amino)-4-methylpentanamido)acryloyl)-*L*-phenylalaninate (35):**

White solid, 1.87 g, 81% yield;  $R_f$  = 0.2 (petroleum/EtOAc = 1:1);  $^1\text{H}$  NMR (500 MHz,  $\text{DMSO-d}_6$ )  $\delta$  7.25-7.17 (6H, m), 6.85 (1H, d,  $J$  = 8.0 Hz), 6.19 (1H, s), 5.73 (1H, d,  $J$  = 9.0 Hz), 4.75 (1H, q,  $J$  = 8.0 Hz), 3.75-3.62 (3H, m), 3.06-2.99 (1H, m), 2.88-2.75 (1H, m), 1.48-1.44 (1H, m), 1.42 (1H, s), 1.36 (9H, s), 1.31-1.23 (3H, m), 0.81 (3H, d,  $J$  = 6.5 Hz), 0.78 (3H, d,  $J$  = 6.0 Hz);  $^{13}\text{C}$  NMR (125 MHz,  $\text{DMSO-d}_6$ )  $\delta$  173.06, 171.26, 164.12, 155.62, 137.81, 132.83, 129.72, 128.74, 126.74, 110.25, 78.54, 54.40, 53.42, 53.09, 41.30, 28.63, 27.78, 24.62, 23.29, 22.03; HRMS (ESI)  $m/z$ :  $[\text{M} + \text{H}]^+$  found for 462.2065, calcd for  $\text{C}_{24}\text{H}_{36}\text{N}_3\text{O}_6$  462.2064.

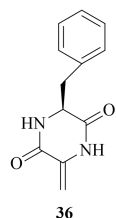

**(*S*)-3-benzyl-6-methylenepiperazine-2, 5-dione (36):**

White solid, 0.85 g, 79% yield;  $R_f$  = 0.2 (petroleum/EtOAc = 4:1);  $^1\text{H}$  NMR (500 MHz,  $\text{DMSO-d}_6$ )  $\delta$  7.25-7.20 (3H, m), 7.12 (2H, d,  $J$  = 6.5 Hz), 4.90 (1H, s), 4.50 (1H, s), 4.38 (1H, t,  $J$  = 4.0 Hz), 4.04 (1H, s), 3.31 (1H, s), 3.14 (1H, dd,  $J$  = 3.5, 14.0 Hz), 2.90 (1H, dd,  $J$  = 5.0, 13.0 Hz);  $^{13}\text{C}$  NMR (125 MHz,  $\text{DMSO-d}_6$ )  $\delta$  165.11, 158.06, 135.40, 134.21, 130.03, 128.04, 126.72, 98.50, 56.09, 55.99; HRMS (ESI)  $m/z$ :  $[\text{M} + \text{H}]^+$  found for 217.0975, calcd for  $\text{C}_{12}\text{H}_{13}\text{N}_2\text{O}_2$  217.0977.

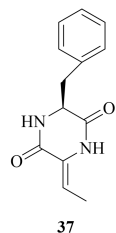

**(*S*, *Z*)-3-benzyl-6-ethylidenepiperazine-2, 5-dione (37):**

White solid, 0.94 g, 82% yield;  $R_f$  = 0.4 (petroleum/EtOAc = 3:1);  $^1\text{H}$  NMR (500 MHz,  $\text{CD}_3\text{OD}$ )  $\delta$  7.23-7.21 (3H,

m), 7.17-7.15 (2H, m), 5.63 (1H, q,  $J = 7.5$  Hz), 4.35 (1H, t,  $J = 4.5$  Hz), 3.20 (1H, dd,  $J = 4.5, 13.5$  Hz), 3.00 (1H, dd,  $J = 4.5, 13.5$  Hz), 1.51 (3H, d,  $J = 7.5$  Hz);  $^{13}\text{C}$  NMR (125 MHz,  $\text{CD}_3\text{OD}$ )  $\delta$  168.16, 162.46, 135.93, 131.43, 129.41, 128.31, 128.26, 115.11, 57.98, 41.39, 10.81; HRMS (ESI)  $m/z$ :  $[\text{M} + \text{H}]^+$  found for 231.1138, calcd for  $\text{C}_{13}\text{H}_{15}\text{N}_2\text{O}_2$  231.1134.

### 4.3 Data of compound 1

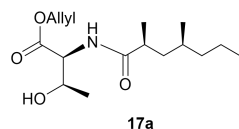

#### allyl ((2*S*, 4*S*)-2, 4-dimethylheptanoyl)-*L*-threoninate (17a):

White solid, 2.54 g, 85.0% yield over two steps;  $R_f = 0.5$  (petroleum/EtOAc = 2:1);  $^1\text{H}$  NMR (500 MHz,  $\text{CDCl}_3$ )  $\delta$  6.35 (1H, br), 5.91-5.83 (1H, m), 5.31 (1H, d,  $J = 17.0$  Hz), 5.22 (1H, d,  $J = 10.5$  Hz), 4.63-4.60 (3H, m), 4.37-4.35 (1H, m), 2.87 (1H, br), 2.46-2.38 (1H, m), 1.73-1.67 (1H, m), 1.48-1.42 (1H, m), 1.35-1.20 (3H, m), 1.18 (3H, d,  $J = 6.5$  Hz), 1.14 (3H, d,  $J = 7.0$  Hz), 1.12-1.02 (2H, m), 0.86 (3H, d,  $J = 6.5$  Hz), 0.83 (3H, t,  $J = 7.0$  Hz);  $^{13}\text{C}$  NMR (125 MHz,  $\text{CDCl}_3$ )  $\delta$  177.53, 170.95, 131.60, 119.00, 68.12, 66.22, 57.01, 41.88, 39.63, 39.35, 30.40, 20.02, 19.70, 19.01, 14.42; HRMS (ESI)  $m/z$ :  $[\text{M} + \text{H}]^+$  found for 300.2179, calcd for  $\text{C}_{16}\text{H}_{30}\text{NO}_4$  300.2175.

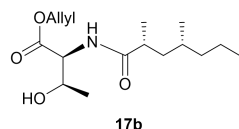

#### allyl ((2*R*, 4*R*)-2, 4-dimethylheptanoyl)-*L*-threoninate (17b):

White solid, 2.57 g, 86% yield over two steps;  $R_f = 0.5$  (petroleum/EtOAc = 2:1);  $^1\text{H}$  NMR (500 MHz,  $\text{CDCl}_3$ )  $\delta$  6.25-6.22 (1H, m), 5.94-5.86 (1H, m), 5.36-5.24 (2H, m), 4.69-4.64 (2H, m), 4.63 (1H, d,  $J = 2.5$  Hz), 4.41-4.32 (1H, m), 2.47-2.40 (1H, m), 2.27-2.21 (1H, m), 1.76-1.70 (1H, m), 1.54-1.39 (1H, m), 1.37-1.31 (1H, m), 1.29-1.23 (2H, m), 1.21 (3H, d,  $J = 6.5$  Hz), 1.16 (3H, d,  $J = 7.0$  Hz), 1.14-1.05 (1H, m), 0.92 (1H, d,  $J = 6.5$  Hz), 0.89 (2H, d,  $J = 6.5$  Hz), 0.86 (3H, t,  $J = 7.0$  Hz);  $^{13}\text{C}$  NMR (125 MHz,  $\text{CDCl}_3$ )  $\delta$  177.45, 171.05, 131.59, 119.05, 68.13, 66.26, 57.08, 41.84, 39.63, 39.43, 30.59, 20.10, 20.05, 19.64, 18.81, 14.40; HRMS (ESI)  $m/z$ :  $[\text{M} + \text{H}]^+$  found for 300.2178, calcd for  $\text{C}_{16}\text{H}_{30}\text{NO}_4$  300.2175.

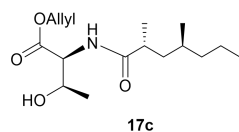

#### allyl ((2*R*, 4*S*)-2, 4-dimethylheptanoyl)-*L*-threoninate (17c):

White solid, 2.54 g, 85% yield over two steps;  $R_f = 0.5$  (petroleum/EtOAc = 2:1);  $^1\text{H}$  NMR (500 MHz,  $\text{CDCl}_3$ )  $\delta$  6.30 (1H, d,  $J = 8.5$  Hz), 5.94-5.86 (1H, m), 5.35-5.31 (1H, m), 5.26-5.23 (1H, m), 4.67-4.64 (2H, m), 4.62 (1H, dd,  $J = 2.5, 9.0$  Hz), 4.40-4.34 (1H, m), 2.52-2.48 (1H, m), 2.41 (1H, q,  $J = 7.0$  Hz), 1.53-1.45 (2H, m), 1.39-1.33 (1H, m), 1.32-1.23 (2H, m), 1.21 (3H, d,  $J = 6.5$  Hz), 1.13 (3H, d,  $J = 7.0$  Hz), 1.11-1.07 (1H, m), 0.92 (1H, d,  $J = 6.5$  Hz), 0.88-0.84 (6H, m);  $^{13}\text{C}$  NMR (125 MHz,  $\text{CDCl}_3$ )  $\delta$  177.83, 171.02, 131.62, 118.90, 67.99, 66.17, 57.19, 41.48, 39.34, 39.20, 30.34, 20.10, 20.03, 19.60, 17.82, 14.43; HRMS (ESI)  $m/z$ :  $[\text{M} + \text{H}]^+$  found for 300.2176, calcd for  $\text{C}_{16}\text{H}_{30}\text{NO}_4$  300.2175.



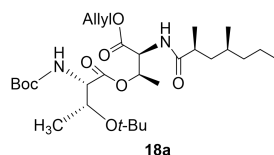

**allyl O-(N-(tert-butoxycarbonyl)-O-(tert-butyl)-L-threonyl)-N-((2S, 4S)-2, 4-dimethylheptanoyl)-L-threoninate (18a):**

Colorless oil, 4.36 g, 98% yield;  $R_f$  = 0.3 (petroleum/EtOAc = 5:1);  $^1\text{H}$  NMR (500 MHz,  $\text{CDCl}_3$ )  $\delta$  6.20 (1H, d,  $J$  = 9.0 Hz), 5.91-5.83 (1H, m), 5.42-5.41 (1H, m), 5.30 (1H, d,  $J$  = 17.0 Hz), 5.22 (2H, d,  $J$  = 10.5 Hz), 4.84-4.82 (1H, m), 4.64-4.60 (2H, m), 4.10-4.03 (2H, m), 2.47-2.41 (1H, m), 1.75-1.71 (1H, m), 1.43 (9H, s), 1.32 (1H, d,  $J$  = 6.5 Hz), 1.27 (3H, d,  $J$  = 6.5 Hz), 1.25-1.20 (2H, m), 1.18-1.16 (6H, m), 1.12 (9H, s), 0.92 (1H, d,  $J$  = 6.5 Hz), 0.88 (3H, d,  $J$  = 6.0 Hz), 0.84 (3H, t,  $J$  = 7.0 Hz);  $^{13}\text{C}$  NMR (125 MHz,  $\text{CDCl}_3$ )  $\delta$  177.23, 170.64, 169.40, 156.04, 131.61, 119.25, 79.85, 74.07, 71.96, 67.08, 66.59, 59.41, 55.28, 41.69, 39.56, 39.24, 30.40, 28.61, 28.41, 20.66, 20.02, 19.77, 19.08, 17.30, 14.40; HRMS (ESI)  $m/z$ :  $[\text{M} + \text{Na}]^+$  found for 579.3625, calcd for  $\text{C}_{29}\text{H}_{52}\text{N}_2\text{O}_8\text{Na}$  579.3621.

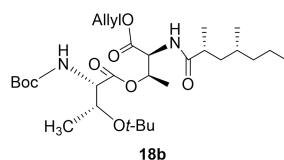

**allyl O-(N-(tert-butoxycarbonyl)-O-(tert-butyl)-L-threonyl)-N-((2R, 4R)-2, 4-dimethylheptanoyl)-L-threoninate (18b):**

Colorless oil, 4.41 g, 99% yield;  $R_f$  = 0.3 (petroleum/EtOAc = 5:1);  $^1\text{H}$  NMR (500 MHz,  $\text{CDCl}_3$ )  $\delta$  6.26 (1H, d,  $J$  = 9.0 Hz), 5.92-5.84 (1H, m), 5.45-5.41 (1H, m), 5.31 (1H, d,  $J$  = 17.0 Hz), 5.25-5.22 (2H, m), 4.83 (1H, dd,  $J$  = 2.5, 9.0 Hz), 4.62 (2H, d,  $J$  = 6.0 Hz), 4.05 (2H, d,  $J$  = 7.0 Hz), 2.49-2.45 (1H, m), 1.71-1.72 (1H, m), 1.44 (11H, s), 1.29 (3H, d,  $J$  = 6.5 Hz), 1.26-1.22 (2H, m), 1.19-1.15 (7H, m), 1.13 (10H, s), 1.78 (3H, d,  $J$  = 6.5 Hz), 0.88 (3H, t,  $J$  = 7.0 Hz);  $^{13}\text{C}$  NMR (125 MHz,  $\text{CDCl}_3$ )  $\delta$  177.23, 170.59, 169.51, 156.03, 131.66, 119.29, 79.91, 74.14, 72.05, 67.18, 66.63, 59.40, 55.34, 41.82, 39.63, 39.32, 30.62, 28.66, 28.45, 20.57, 20.06, 19.62, 18.75, 17.39, 14.39; HRMS (ESI)  $m/z$ :  $[\text{M} + \text{Na}]^+$  found for 579.3621, calcd for  $\text{C}_{29}\text{H}_{52}\text{N}_2\text{O}_8\text{Na}$  579.3621.

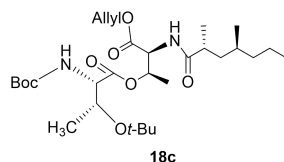

**allyl O-(N-(tert-butoxycarbonyl)-O-(tert-butyl)-L-threonyl)-N-((2R, 4S)-2, 4-dimethylheptanoyl)-L-threoninate (18c):**

Colorless oil, 4.27 g, 96% yield;  $R_f$  = 0.3 (petroleum/EtOAc = 5:1);  $^1\text{H}$  NMR (500 MHz,  $\text{CDCl}_3$ )  $\delta$  6.26 (1H, d,  $J$  = 9.0 Hz), 5.95-5.84 (1H, m), 5.45-5.41 (1H, m), 5.34-5.29 (1H, m), 5.25-5.23 (2H, m), 4.83 (1H, dd,  $J$  = 2.5, 9.0 Hz), 4.65-4.61 (2H, m), 4.07-4.04 (2H, m), 2.47-2.42 (1H, m), 1.55-1.47 (2H, m), 1.44 (9H, s), 1.41-1.32 (2H, m), 1.29 (3H, d,  $J$  = 6.5 Hz), 1.27-1.22 (2H, m), 1.17 (3H, d,  $J$  = 6.0 Hz), 1.14 (3H, s), 1.13 (9H, s), 0.96-0.92 (1H, m), 0.89-0.86 (6H, m);  $^{13}\text{C}$  NMR (125 MHz,  $\text{CDCl}_3$ )  $\delta$  177.55, 170.60, 169.52, 156.04, 131.65, 119.27, 79.89, 74.11, 71.99, 67.11, 66.63, 59.38, 55.34, 41.49, 39.31, 39.14, 30.39, 28.63, 28.42, 20.60, 20.04, 19.68, 17.83, 17.37, 14.47; HRMS (ESI)  $m/z$ :  $[\text{M} + \text{Na}]^+$  found for 579.3621, calcd for  $\text{C}_{29}\text{H}_{52}\text{N}_2\text{O}_8\text{Na}$  579.3621.

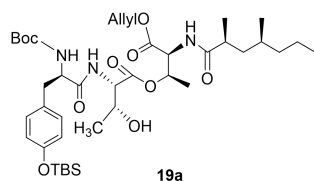

**allyl *O*-(((*R*)-2-((*tert*-butoxycarbonyl)amino)-3-(4-((*tert*-butyldimethylsilyl)oxy)phenyl)propanoyl)-*L*-threonyl)-*N*-((2*S*, 4*S*)-2, 4-dimethylheptanoyl)-*L*-threoninate (19a):**

White amorphous solid, 4.63 g, 85% yield over two steps;  $R_f = 0.5$  (petroleum/EtOAc = 2:1);  $^1\text{H NMR}$  (500 MHz,  $\text{CDCl}_3$ )  $\delta$  7.08 (2H, d,  $J = 8.5$  Hz), 6.77 (2H, d,  $J = 8.0$  Hz), 6.70 (1H, s), 6.58 (1H, d,  $J = 7.5$  Hz), 5.93-5.85 (1H, m), 5.48-5.46 (1H, m), 5.35-5.30 (1H, m), 5.27-5.25 (1H, m), 5.08 (1H, br), 4.76 (1H, d,  $J = 8.0$  Hz), 4.60 (2H, d,  $J = 6.0$  Hz), 4.35-4.28 (2H, m), 4.24-4.22 (1H, m), 3.09-3.05 (1H, m), 2.96-2.91 (1H, m), 1.76-1.70 (1H, m), 1.41 (2H, d,  $J = 3.0$  Hz), 1.40 (9H, s), 1.29 (4H, d,  $J = 7.0$  Hz), 1.27-1.21 (3H, m), 1.16 (3H, d,  $J = 7.0$  Hz), 1.14-1.06 (2H, m), 1.03 (3H, d,  $J = 5.0$  Hz), 0.97 (9H, s), 0.90 (3H, d,  $J = 6.5$  Hz), 0.85 (3H, t,  $J = 7.0$  Hz), 0.18 (6H, s);  $^{13}\text{C NMR}$  (125 MHz,  $\text{CDCl}_3$ )  $\delta$  177.94, 172.46, 170.69, 169.92, 154.90, 131.48, 130.49, 130.30, 129.17, 120.45, 120.28, 119.47, 71.57, 67.49, 66.81, 57.75, 55.51, 41.97, 39.67, 38.74, 37.60, 30.42, 28.43, 25.80, 20.08, 19.80, 19.78, 19.01, 18.32, 17.08, 14.45, -4.31; HRMS (ESI)  $m/z$ :  $[\text{M} + \text{H}]^+$  found for 778.4672, calcd for  $\text{C}_{40}\text{H}_{68}\text{N}_3\text{O}_{10}\text{Si}$  778.4674.

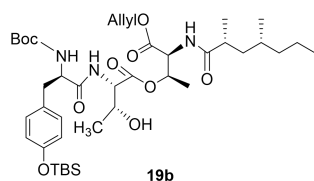

**allyl *O*-(((*R*)-2-((*tert*-butoxycarbonyl)amino)-3-(4-((*tert*-butyldimethylsilyl)oxy)phenyl)propanoyl)-*L*-threonyl)-*N*-((2*R*, 4*R*)-2, 4-dimethylheptanoyl)-*L*-threoninate (19b):**

White amorphous solid, 4.68 g, 86% yield over two steps;  $R_f = 0.5$  (petroleum/EtOAc = 2:1);  $^1\text{H NMR}$  (500 MHz,  $\text{CDCl}_3$ )  $\delta$  7.09-7.06 (2H, m), 6.77-6.73 (3H, m), 6.54 (1H, s), 5.92-5.84 (1H, m), 5.49-5.45 (1H, m), 5.34-5.31 (1H, m), 5.25 (1H, d,  $J = 10.5$  Hz), 5.09 (1H, d,  $J = 7.5$  Hz), 4.78 (1H, d,  $J = 7.5$  Hz), 4.60 (2H, d,  $J = 6.0$  Hz), 4.40-4.31 (2H, m), 4.21-4.20 (1H, m), 3.13-3.09 (1H, m), 2.95-2.91 (1H, m), 2.56-2.50 (1H, m), 1.77-1.71 (1H, m), 1.38 (9H, s), 1.34-1.22 (5H, m), 2.30 (3H, d,  $J = 7.0$  Hz), 1.13-1.05 (4H, m), 0.96 (9H, s), 0.91-0.88 (5H, m), 0.84 (3H, t,  $J = 7.0$  Hz), 0.18 (6H, s);  $^{13}\text{C NMR}$  (125 MHz,  $\text{CDCl}_3$ )  $\delta$  177.67, 172.45, 172.39, 170.61, 169.97, 169.85, 154.81, 154.79, 131.45, 130.33, 130.30, 129.31, 120.38, 119.51, 67.49, 66.85, 57.67, 55.32, 41.68, 39.66, 39.04, 30.64, 28.38, 25.78, 20.07, 19.72, 19.61, 19.14, 18.89, 18.29, 17.14, 14.41, -4.33; HRMS (ESI)  $m/z$ :  $[\text{M} + \text{H}]^+$  found for 778.4658, calcd for  $\text{C}_{40}\text{H}_{68}\text{N}_3\text{O}_{10}\text{Si}$  778.4674.

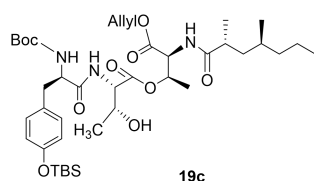

**allyl *O*-(((*R*)-2-((*tert*-butoxycarbonyl)amino)-3-(4-((*tert*-butyldimethylsilyl)oxy)phenyl)propanoyl)-*L*-threonyl)-*N*-((2*R*, 4*S*)-2, 4-dimethylheptanoyl)-*L*-threoninate (19c):**

White amorphous solid, 4.57 g, 84% yield over two steps;  $R_f = 0.5$  (petroleum/EtOAc = 2:1);  $^1\text{H NMR}$  (500 MHz,  $\text{CDCl}_3$ )  $\delta$  7.07 (2H, d,  $J = 8.0$  Hz), 6.76 (2H, d,  $J = 8.0$  Hz), 6.71 (1H, d,  $J = 8.0$  Hz), 6.51 (1H, s), 5.92-5.84 (1H, m), 5.49-5.45 (1H, m), 5.33 (1H, dd,  $J = 1.5, 17.0$  Hz), 5.25 (1H, dd,  $J = 1.0, 10.5$  Hz), 5.07 (1H, s), 4.77 (1H, d,  $J = 7.5$  Hz), 4.61 (2H, d,  $J = 6.0$  Hz), 4.40-4.32 (2H, m), 4.21 (1H, d,  $J = 6.5$  Hz), 3.14-3.10 (1H, m), 2.95-2.90 (1H, m), 2.63 (1H, s), 2.53-2.47 (1H, m), 1.54-1.47 (1H, m), 1.46-1.41 (2H, m), 1.38 (9H, s), 1.35-1.31 (2H, m), 1.29 (3H, d,  $J = 6.5$  Hz), 1.26-1.21 (1H, m), 1.14 (3H, d,  $J = 6.5$  Hz), 1.07 (3H, d,  $J = 6.5$  Hz), 0.96 (9H, s), 0.91-0.88 (2H, m), 0.87-0.84 (5H, m), 0.17 (6H, s);  $^{13}\text{C NMR}$  (125 MHz,  $\text{CDCl}_3$ )  $\delta$  178.01, 172.44, 172.37, 170.55, 169.99, 169.85, 154.80, 131.45, 130.30, 129.30, 120.37, 119.50, 80.40, 71.67, 67.42, 66.83, 57.64, 55.38, 41.30, 39.44, 38.95, 37.53, 30.43, 28.39, 25.77, 20.10, 19.73, 19.61, 19.13, 18.29, 17.95, 17.15, 14.46, -4.34; HRMS (ESI)

m/z: [M + H]<sup>+</sup> found for 778.4673, calcd for C<sub>40</sub>H<sub>68</sub>N<sub>3</sub>O<sub>10</sub>Si 778.4674.

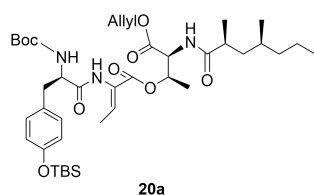

**(2R, 3S)-4-(allyloxy)-3-((2S, 4S)-2, 4-dimethylheptanamido)-4-oxobutan-2-yl (Z)-2-((R)-2-((tert-butoxycarbonyl)amino)-3-(4-((tert-butyl dimethylsilyl)oxy)phenyl)propanamido)but-2-enoate (20a):**

Yellow solid, 3.87 g, 85%; *R<sub>f</sub>* = 0.5 (petroleum/EtOAc = 2:1); <sup>1</sup>H NMR (500 MHz, CDCl<sub>3</sub>) δ 7.20 (1H, s), 7.10 (2H, d, *J* = 8.5 Hz), 6.88 (1H, s), 6.79-6.77 (3H, m), 5.91-5.83 (1H, m), 5.45 (1H, s), 5.33-5.29 (1H, m), 5.21 (1H, d, *J* = 10.0 Hz), 4.94 (1H, s), 4.91 (1H, dd, *J* = 3.0, 9.0 Hz), 4.63 (2H, d, *J* = 6.0 Hz), 4.44 (1H, d, *J* = 6.0 Hz), 3.09-3.04 (2H, m), 1.79-1.74 (1H, m), 1.69-1.66 (4H, m), 1.43 (9H, s), 1.35-1.31 (2H, m), 1.28 (3H, d, *J* = 6.5 Hz), 1.26-1.21 (2H, m), 1.15 (3H, d, *J* = 7.0 Hz), 1.11-1.06 (2H, m), 0.97 (9H, s), 0.91 (3H, d, *J* = 6.5 Hz), 0.86 (3H, t, *J* = 7.0 Hz), 0.18 (6H, s); <sup>13</sup>C NMR (125 MHz, CDCl<sub>3</sub>) δ 177.82, 170.48, 169.68, 162.96, 154.95, 135.73, 131.72, 130.49, 130.44, 128.98, 126.33, 120.52, 119.33, 119.24, 80.77, 72.23, 66.58, 55.47, 41.96, 39.83, 38.77, 36.59, 30.51, 28.38, 25.80, 20.10, 19.73, 19.30, 18.33, 16.92, 14.47, 14.41, -4.30; HRMS (ESI) m/z: [M + H]<sup>+</sup> found for 760.4564, calcd for C<sub>40</sub>H<sub>66</sub>N<sub>3</sub>O<sub>9</sub>Si 760.4568.

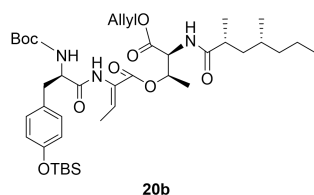

**(2R, 3S)-4-(allyloxy)-3-((2R, 4R)-2, 4-dimethylheptanamido)-4-oxobutan-2-yl (Z)-2-((R)-2-((tert-butoxycarbonyl)amino)-3-(4-((tert-butyl dimethylsilyl)oxy)phenyl)propanamido)but-2-enoate (20b):**

Yellow solid, 3.74 g, 82%; *R<sub>f</sub>* = 0.6 (petroleum/EtOAc = 2:1); <sup>1</sup>H NMR (500 MHz, CDCl<sub>3</sub>) δ 7.28 (1H, s), 7.10 (2H, d, *J* = 8.0 Hz), 6.78-6.70 (3H, m), 5.91-5.83 (1H, m), 5.43-5.41 (1H, m), 5.33-5.29 (1H, m), 5.26-5.21 (1H, m), 4.95 (1H, s), 4.87 (1H, dd, *J* = 3.0, 9.0 Hz), 4.66-4.56 (2H, m), 4.43 (1H, s), 3.88-3.07 (2H, m), 1.83-1.74 (1H, m), 1.70-1.66 (4H, m), 1.42 (9H, s), 1.37 (2H, d, *J* = 6.5 Hz), 1.35-1.31 (1H, m), 1.29 (3H, d, *J* = 6.5 Hz), 1.27-1.21 (2H, m), 1.17 (3H, d, *J* = 6.5 Hz), 1.13-1.07 (1H, m), 0.97 (9H, s), 0.92 (2H, d, *J* = 6.5 Hz), 0.88-0.83 (5H, m), 0.18 (6H, s); <sup>13</sup>C NMR (125 MHz, CDCl<sub>3</sub>) δ 177.57, 170.47, 169.74, 163.06, 154.90, 135.10, 131.65, 130.45, 130.36, 130.30, 129.08, 120.49, 120.43, 120.31, 119.27, 72.23, 66.62, 55.56, 41.60, 39.76, 39.10, 30.69, 28.40, 25.80, 20.09, 19.70, 19.17, 19.09, 18.32, 17.05, 16.88, 14.44, -4.30; HRMS (ESI) m/z: [M + H]<sup>+</sup> found for 760.4577, calcd for C<sub>40</sub>H<sub>66</sub>N<sub>3</sub>O<sub>9</sub>Si 760.4568.

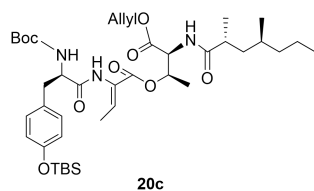

**(2R, 3S)-4-(allyloxy)-3-((2R, 4S)-2, 4-dimethylheptanamido)-4-oxobutan-2-yl (Z)-2-((R)-2-((tert-butoxycarbonyl)amino)-3-(4-((tert-butyl dimethylsilyl)oxy)phenyl)propanamido)but-2-enoate (20c):**

Yellow solid, 3.78 g, 83%; *R<sub>f</sub>* = 0.5 (petroleum/EtOAc = 2:1); <sup>1</sup>H NMR (500 MHz, CDCl<sub>3</sub>) δ 7.29 (1H, s), 7.10 (2H, d, *J* = 8.0 Hz), 6.77 (2H, d, *J* = 8.0 Hz), 6.72 (1H, q, *J* = 7.0 Hz), 6.55 (1H, s), 5.91-5.83 (1H, m), 5.42-5.40 (1H, m), 5.31 (1H, dd, *J* = 1.5, 17.0 Hz), 5.22 (1H, dd, *J* = 1.0, 10.0 Hz), 4.98 (1H, s), 4.86 (1H, dd, *J* = 3.5, 9.5 Hz), 4.64-4.62 (2H, m), 4.43 (1H, s), 3.11-3.03 (2H, m), 2.53-2.48 (1H, m), 1.87-1.74 (1H, m), 1.69 (3H, d, *J* = 7.5

(Hz), 1.57-1.51 (1H, m), 1.49-1.44 (1H, m), 1.41 (9H, s), 1.38-1.31 (1H, m), 1.29 (3H, d,  $J = 6.0$  Hz), 1.27-1.17 (1H, m), 1.15 (3H, d,  $J = 7.0$  Hz), 1.10-1.03 (1H, m), 0.97 (9H, s), 0.91 (1H, d,  $J = 7.0$  Hz), 0.88-0.84 (6H, m), 0.17 (6H, s);  $^{13}\text{C}$  NMR (125 MHz,  $\text{CDCl}_3$ )  $\delta$  177.89, 170.46, 169.74, 163.05, 154.87, 135.06, 131.61, 130.43, 129.09, 126.24, 120.46, 119.29, 80.62, 72.22, 66.60, 55.60, 41.27, 39.41, 39.02, 36.87, 30.50, 28.39, 25.78, 20.10, 20.07, 19.73, 19.15, 18.30, 18.23, 17.07, 14.47, 14.43, -4.33; HRMS (ESI)  $m/z$ :  $[\text{M} + \text{H}]^+$  found for 760.4561, calcd for  $\text{C}_{40}\text{H}_{66}\text{N}_3\text{O}_9\text{Si}$  760.4568.

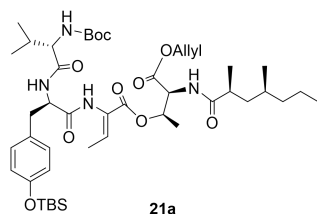

**(2R, 3S)-4-(allyloxy)-3-((2S, 4S)-2, 4-dimethylheptanamido)-4-oxobutan-2-yl (6S, 9R, Z)-9-(4-(tert-butylidimethylsilyloxy)benzyl)-12-ethylidene-6-isopropyl-2,2-dimethyl-4, 7, 10-trioxo-3-oxa-5, 8, 11-triazatridecan-13-oate (21a):**

White amorphous solid, 4.08 g, 90% over two steps;  $R_f = 0.5$  (petroleum/EtOAc = 2:1);  $^1\text{H}$  NMR (500 MHz,  $\text{CDCl}_3$ )  $\delta$  8.18 (1H, s), 7.78 (1H, d,  $J = 10.0$  Hz), 7.08 (2H, d,  $J = 8.5$  Hz), 6.76-6.73 (3H, m), 6.13 (1H, d,  $J = 8.0$  Hz), 5.97-5.89 (1H, m), 5.47-5.44 (1H, m), 5.33-5.29 (1H, m), 5.20 (1H, d,  $J = 11.0$  Hz), 4.95 (1H, dd,  $J = 2.5, 9.5$  Hz), 4.90 (1H, d,  $J = 6.0$  Hz), 4.85 (1H, q,  $J = 7.0$  Hz), 4.71 (2H, d,  $J = 5.5$  Hz), 3.39 (1H, t,  $J = 7.0$  Hz), 3.16-3.10 (2H, m), 2.83 (1H, s), 1.85-1.77 (2H, m), 1.68 (3H, d,  $J = 7.0$  Hz), 1.45-1.40 (2H, m), 1.32 (2H, s), 1.28 (9H, s), 1.19 (3H, d,  $J = 6.5$  Hz), 1.16 (3H, d,  $J = 7.0$  Hz), 1.09-1.00 (2H, m), 0.96 (9H, s), 0.92 (3H, d,  $J = 6.5$  Hz), 0.86-0.82 (6H, m), 0.77 (3H, d,  $J = 6.5$  Hz), 0.17 (6H, s);  $^{13}\text{C}$  NMR (125 MHz,  $\text{CDCl}_3$ )  $\delta$  178.08, 172.35, 170.62, 169.45, 163.29, 156.75, 155.03, 135.49, 132.22, 130.34, 129.04, 127.90, 120.59, 118.56, 80.79, 72.46, 66.60, 62.32, 55.09, 54.25, 41.56, 39.93, 38.15, 35.93, 30.51, 29.93, 28.34, 28.29, 25.78, 20.11, 19.74, 19.63, 19.22, 19.19, 18.96, 18.31, 16.75, 14.47, 13.48, -4.33; HRMS (ESI)  $m/z$ :  $[\text{M} + \text{H}]^+$  found for 859.5255, calcd for  $\text{C}_{40}\text{H}_{75}\text{N}_6\text{O}_{12}\text{Si}$  859.5252.

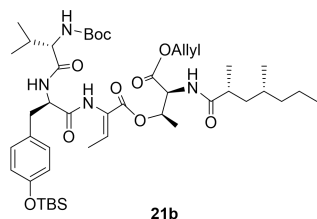

**(2R, 3S)-4-(allyloxy)-3-((2R, 4R)-2, 4-dimethylheptanamido)-4-oxobutan-2-yl (6S, 9R, Z)-9-(4-(tert-butylidimethylsilyloxy)benzyl)-12-ethylidene-6-isopropyl-2, 2-dimethyl-4, 7, 10-trioxo-3-oxa-5, 8, 11-triazatridecan-13-oate (21b):**

White amorphous solid, 3.95 g, 92% over two steps;  $R_f = 0.5$  (petroleum/EtOAc = 2:1);  $^1\text{H}$  NMR (500 MHz,  $\text{CDCl}_3$ )  $\delta$  8.27 (1H, s), 7.81 (1H, d,  $J = 9.5$  Hz), 7.09 (2H, d,  $J = 8.5$  Hz), 6.75-6.71 (3H, m), 6.24-6.23 (1H, m), 5.95-5.90 (1H, m), 5.47-5.45 (1H, m), 5.30 (1H, d,  $J = 17.5$  Hz), 5.19 (1H, d,  $J = 10.5$  Hz), 4.94 (1H, d,  $J = 9.5$  Hz), 4.86 (2H, d,  $J = 5.0$  Hz), 4.72 (2H, d,  $J = 5.5$  Hz), 3.39 (1H, t,  $J = 6.5$  Hz), 3.12 (2H, d,  $J = 5.5$  Hz), 1.81-1.76 (2H, m), 1.68 (3H, d,  $J = 7.0$  Hz), 1.44-1.36 (3H, m), 1.31 (2H, s), 1.26 (9H, s), 1.18 (3H, d,  $J = 6.5$  Hz), 1.12 (3H, d,  $J = 6.5$  Hz), 1.09-0.99 (2H, m), 0.95 (9H, s), 0.91 (6H, d,  $J = 6.5$  Hz), 0.83 (3H, t,  $J = 7.0$  Hz), 0.77 (3H, d,  $J = 6.5$  Hz), 0.16 (6H, s);  $^{13}\text{C}$  NMR (125 MHz,  $\text{CDCl}_3$ )  $\delta$  178.35, 172.36, 170.86, 169.42, 165.91, 163.32, 156.74, 154.94, 135.41, 132.26, 130.32, 129.23, 128.09, 120.52, 118.43, 80.66, 72.00, 66.61, 62.25, 55.22, 54.30, 41.57, 39.92, 38.72, 38.22, 35.75, 30.67, 29.89, 28.22, 25.75, 20.13, 19.58, 19.11, 18.81, 18.28, 16.67, 14.38, -4.37;

HRMS (ESI)  $m/z$ :  $[M + H]^+$  found for 859.5250, calcd for  $C_{40}H_{75}N_6O_{12}Si$  859.5252.

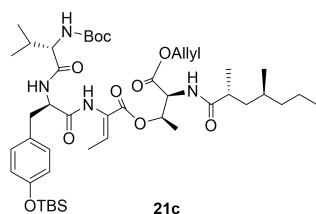

**(2*R*, 3*S*)-4-(allyloxy)-3-((2*R*, 4*S*)-2, 4-dimethylheptanamido)-4-oxobutan-2-yl (6*S*, 9*R*, *Z*)-9-(4-((*tert*-butyldimethylsilyloxy)benzyl)-12-ethylidene-6-isopropyl-2, 2-dimethyl-4, 7, 10-trioxo-3-oxa-5, 8, 11-triazatridecan-13-oate (21c):**

White amorphous solid, 4.08 g, 90% over two steps;  $R_f = 0.5$  (petroleum/EtOAc = 2:1);  $^1H$  NMR (500 MHz,  $CDCl_3$ )  $\delta$  8.22 (1H, s), 7.54 (1H, d,  $J = 9.0$  Hz), 7.09 (2H, d,  $J = 8.5$  Hz), 6.94 (1H, s), 6.77-6.73 (3H, m), 6.24 (1H, d,  $J = 7.5$  Hz), 5.96-5.86 (1H, m), 5.47-5.43 (1H, m), 5.34-5.29 (1H, m), 5.22-5.19 (1H, m), 4.95-4.90 (1H, m), 4.83 (1H, q,  $J = 7.0$  Hz), 4.71 (2H, d,  $J = 5.5$  Hz), 4.65-4.58 (1H, m), 4.20-4.19 (1H, m), 3.43 (1H, t,  $J = 7.5$  Hz), 3.20-3.09 (1H, m), 2.72 (1H, q,  $J = 6.5$  Hz), 2.26-2.20 (1H, m), 2.06-1.81 (2H, m), 1.69 (2H, d,  $J = 7.0$  Hz), 1.54-1.46 (1H, m), 1.44-1.39 (1H, m), 1.37-1.32 (3H, m), 1.30 (9H, s), 1.22 (3H, d,  $J = 6.5$  Hz), 1.13 (3H, d,  $J = 6.5$  Hz), 1.07 (3H, d,  $J = 7.0$  Hz), 1.01 (3H, d,  $J = 6.5$  Hz), 0.97 (9H, s), 0.91 (3H, t,  $J = 9.0$  Hz), 0.87 (3H, d,  $J = 6.5$  Hz), 0.17 (6H, s);  $^{13}C$  NMR (125 MHz,  $CDCl_3$ )  $\delta$  178.66, 172.35, 170.70, 169.57, 163.33, 156.76, 155.05, 135.40, 132.23, 130.38, 129.11, 127.99, 120.61, 120.52, 118.62, 80.81, 72.22, 66.67, 62.47, 55.32, 54.27, 41.04, 39.64, 38.35, 35.91, 30.39, 29.91, 28.36, 28.29, 25.80, 20.08, 19.68, 19.20, 19.05, 18.33, 17.98, 16.80, 14.54, 13.49, -4.31; HRMS (ESI)  $m/z$ :  $[M + H]^+$  found for 859.5255, calcd for  $C_{40}H_{75}N_6O_{12}Si$  859.5252.

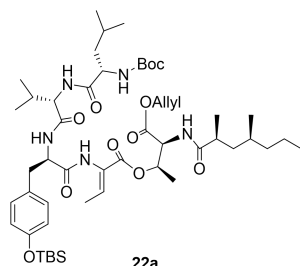

**(2*R*, 3*S*)-4-(allyloxy)-3-((2*S*, 4*S*)-2, 4-dimethylheptanamido)-4-oxobutan-2-yl (6*S*, 9*S*, 12*R*, *Z*)-12-(4-((*tert*-butyldimethylsilyloxy)benzyl)-15-ethylidene-6-isobutyl-9-isopropyl-2, 2-dimethyl-4, 7, 10, 13-tetraoxo-3-oxa-5, 8, 11, 14-tetraazahexadecan-16-oate (22a):**

White amorphous solid, 3.26 g, 84% yield over two steps;  $R_f = 0.5$  (petroleum/EtOAc = 2:1);  $^1H$  NMR (500 MHz,  $CDCl_3$ )  $\delta$  8.05 (1H, s), 7.63 (1H, d,  $J = 9.0$  Hz), 7.08 (2H, d,  $J = 8.0$  Hz), 6.83 (1H, s), 6.75-6.70 (3H, m), 6.56 (1H, d,  $J = 8.0$  Hz), 5.93-5.86 (1H, m), 5.47-5.46 (1H, m), 5.30 (1H, dd,  $J = 1.5, 17.0$  Hz), 5.22-5.15 (1H, m), 4.94 (1H, d,  $J = 2.0, 9.5$  Hz), 4.89 (1H, d,  $J = 6.5$  Hz), 4.73 (1H, d,  $J = 5.5$  Hz), 4.66 (2H, d,  $J = 5.5$  Hz), 4.02 (1H, d,  $J = 6.0$  Hz), 3.87 (1H, d,  $J = 7.0$  Hz), 3.75 (1H, t,  $J = 6.5$  Hz), 3.26-3.18 (1H, m), 3.10-2.99 (1H, m), 2.73 (1H, s), 2.07-2.01 (2H, m), 1.93-1.89 (2H, m), 1.81-1.76 (1H, m), 1.67-1.64 (3H, m), 1.53-1.43 (4H, m), 1.40 (9H, s), 1.35-1.30 (2H, m), 1.23 (3H, d,  $J = 6.5$  Hz), 1.16 (2H, d,  $J = 7.0$  Hz), 1.09-1.02 (2H, m), 0.96 (9H, s), 0.91 (2H, d,  $J = 7.0$  Hz), 0.87-0.85 (8H, m), 0.84-0.83 (4H, m), 0.77 (2H, d,  $J = 6.5$  Hz), 0.16 (6H, s);  $^{13}C$  NMR (125 MHz,  $CDCl_3$ )  $\delta$  178.21, 174.66, 170.74, 170.59, 169.42, 163.42, 156.51, 154.58, 134.03, 132.32, 130.60, 130.17, 127.82, 120.34, 118.53, 81.25, 72.29, 66.52, 60.28, 55.09, 54.85, 54.28, 41.78, 40.05, 38.16, 35.37, 30.48, 28.96, 28.62, 25.79, 24.78, 22.71, 22.31, 20.13, 19.69, 19.59, 19.43, 18.31, 16.90, 16.78, 14.48, 13.71, -4.34; HRMS (ESI)  $m/z$ :  $[M + H]^+$  found for 972.6093, calcd for  $C_{51}H_{86}N_5O_{11}Si$  972.6093.

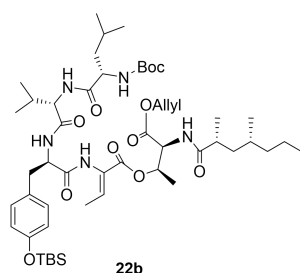

**(2*R*, 3*S*)-4-(allyloxy)-3-((2*R*, 4*R*)-2, 4-dimethylheptanamido)-4-oxobutan-2-yl (6*S*, 9*S*, 12*R*, *Z*)-12-(4-((*tert*-butyldimethylsilyl)oxy)benzyl)-15-ethylidene-6-isobutyl-9-isopropyl-2, 2-dimethyl-4, 7, 10, 13-tetraoxo-3-oxa-5, 8, 11, 14-tetraazahexadecan-16-oate (22b):**

White amorphous solid, 3.38 g, 87% yield over two steps;  $R_f$  = 0.5 (petroleum/EtOAc = 2:1);  $^1\text{H NMR}$  (500 MHz,  $\text{CDCl}_3$ )  $\delta$  8.09 (1H, s), 7.62 (1H, s), 7.10-7.06 (3H, m), 6.83-6.74 (4H, m), 5.95-5.87 (1H, m), 5.51 (1H, s), 5.31 (1H, d,  $J$  = 18.5 Hz), 5.21 (1H, d,  $J$  = 10.0 Hz), 5.07 (1H, s), 4.93-4.90 (1H, m), 4.74 (1H, s), 4.68-4.54 (3H, m), 4.05 (1H, s), 3.94-3.87 (1H, m), 3.76-3.68 (1H, m), 3.27-3.23 (1H, m), 3.07-3.03 (1H, m), 2.67 (1H, s), 2.27-2.22 (1H, m), 2.08-2.02 (2H, m), 1.92-1.81 (1H, m), 1.69 (3H, d,  $J$  = 7.0 Hz), 1.65 (2H, d,  $J$  = 7.0 Hz), 1.43-1.41 (6H, m), 1.40 (9H, s), 1.36-1.31 (2H, m), 1.26 (3H, d,  $J$  = 6.5 Hz), 1.14 (3H, d,  $J$  = 7.0 Hz), 1.09-1.03 (1H, m), 0.97 (9H, s), 0.95-0.91 (5H, m), 0.89-0.83 (5H, m), 0.76 (2H, d,  $J$  = 6.0 Hz), 0.17 (6H, s);  $^{13}\text{C NMR}$  (125 MHz,  $\text{CDCl}_3$ )  $\delta$  178.16, 173.99, 171.75, 169.92, 163.15, 156.20, 154.89, 135.48, 131.96, 130.23, 129.41, 127.06, 120.50, 120.42, 118.90, 80.81, 71.72, 66.62, 61.01, 57.16, 55.40, 55.10, 41.60, 41.51, 39.94, 39.91, 38.79, 38.60, 30.72, 28.41, 25.80, 24.71, 22.88, 22.07, 20.13, 19.65, 19.20, 19.16, 19.09, 18.32, 17.09, 14.42, 14.08, -4.32; HRMS (ESI)  $m/z$ :  $[\text{M} + \text{H}]^+$  found for 972.6092, calcd for  $\text{C}_{51}\text{H}_{86}\text{N}_5\text{O}_{11}\text{Si}$  972.6093.

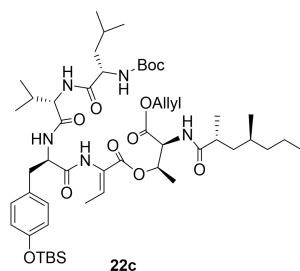

**(2*R*, 3*S*)-4-(allyloxy)-3-((2*R*, 4*S*)-2, 4-dimethylheptanamido)-4-oxobutan-2-yl (6*S*, 9*S*, 12*R*, *Z*)-12-(4-((*tert*-butyldimethylsilyl)oxy)benzyl)-15-ethylidene-6-isobutyl-9-isopropyl-2, 2-dimethyl-4, 7, 10, 13-tetraoxo-3-oxa-5, 8, 11, 14-tetraazahexadecan-16-oate (22c):**

White amorphous solid, 3.19 g, 82% yield over two steps;  $R_f$  = 0.5 (petroleum/EtOAc = 2:1);  $^1\text{H NMR}$  (500 MHz,  $\text{CDCl}_3$ )  $\delta$  8.03 (1H, s), 7.41 (1H, s), 7.09 (2H, d,  $J$  = 9.0 Hz), 6.83 (1H, s), 6.75-6.71 (3H, m), 6.61 (1H, d,  $J$  = 8.5 Hz), 5.93-5.85 (1H, m), 5.48-5.47 (1H, m), 5.30 (1H, dd,  $J$  = 1.5, 17.0 Hz), 5.20 (1H, d,  $J$  = 10.0 Hz), 5.08-5.03 (1H, m), 4.90 (1H, dd,  $J$  = 2.0, 9.0 Hz), 4.73 (1H, d,  $J$  = 5.0 Hz), 4.64 (2H, d,  $J$  = 5.5 Hz), 4.57-4.52 (1H, m), 4.11 (1H, q,  $J$  = 7.0 Hz), 4.04 (1H, s), 3.88-3.79 (1H, m), 3.26-3.22 (1H, m), 3.06-3.02 (1H, m), 2.63-2.59 (1H, m), 2.25-2.22 (1H, m), 2.07-2.01 (2H, m), 1.67 (3H, d,  $J$  = 6.5 Hz), 1.53-1.47 (2H, m), 1.43 (6H, s), 1.39 (9H, s), 1.36-1.29 (2H, m), 1.27-1.24 (4H, m), 1.13 (3H, d,  $J$  = 7.0 Hz), 0.96 (9H, s), 0.93-0.89 (4H, m), 0.88-0.81 (7H, m), 0.75 (3H, d,  $J$  = 6.5 Hz), 0.16 (6H, s);  $^{13}\text{C NMR}$  (125 MHz,  $\text{CDCl}_3$ )  $\delta$  178.55, 173.80, 171.73, 170.00, 169.88, 163.13, 156.18, 154.83, 135.27, 131.89, 130.25, 129.43, 127.03, 120.44, 120.38, 118.96, 80.75, 71.87, 66.59, 60.70, 57.18, 55.44, 55.08, 41.53, 41.00, 39.62, 38.64, 30.46, 28.40, 25.79, 24.80, 24.73, 22.88, 22.10, 20.11, 19.67, 19.15, 18.30, 18.07, 17.70, 17.11, 14.51, 14.06, -4.33; HRMS (ESI)  $m/z$ :  $[\text{M} + \text{H}]^+$  found for 972.6099, calcd for  $\text{C}_{51}\text{H}_{86}\text{N}_5\text{O}_{11}\text{Si}$  972.6093.

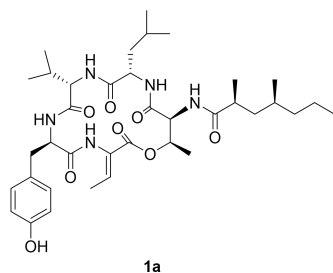

**(2*S*, 4*S*)-*N*-((6*R*, 9*S*, 12*S*, 15*S*, 16*R*, *Z*)-3-ethylidene-6-(4-hydroxybenzyl)-12-isobutyl-9-isopropyl-16-methyl-, 5, 8, 11, 14-pentaoxo-1-oxa-4, 7, 10, 13-tetraazacyclohexadecan-15-yl)-2, 4-dimethylheptanamide (1a):**

White solid, 164.4 mg, 47% yield over four steps;  $R_f = 0.5$  ( $\text{CH}_2\text{Cl}_2/\text{MeOH} = 40:1$ );  $[\alpha]_D^{20} -30.77$  ( $c$  0.65, MeOH);  $^1\text{H NMR}$  (500 MHz, Acetone- $d_6$ )  $\delta$  8.50-8.46 (1H, m), 8.42 (1H, s), 8.19 (1H, s), 7.91-7.87 (1H, m), 7.38 (1H, t,  $J = 7.0$  Hz), 7.22 (2H, t,  $J = 8.5$  Hz), 6.76 (2H, d,  $J = 8.0$  Hz), 6.61-6.55 (1H, m), 5.22-5.19 (1H, m), 4.95-4.56 (1H, m), 4.43-4.32 (1H, m), 4.22-4.20 (1H, m), 3.81-3.77 (1H, m), 3.35-3.32 (1H, m), 3.30-3.25 (1H, m), 3.03-2.94 (1H, m), 2.82 (3H, s), 2.48-2.43 (1H, m), 1.97-1.77 (1H, m), 1.70 (3H, d,  $J = 7.0$  Hz), 1.69-1.64 (2H, m), 1.59-1.54 (2H, m), 1.42-1.39 (2H, m), 1.35 (3H, d,  $J = 6.0$  Hz), 1.20-1.14 (2H, m), 1.06 (2H, d,  $J = 7.0$  Hz), 1.05-1.01 (1H, m), 0.99-0.94 (9H, m), 0.89-0.86 (2H, m), 0.83-0.78 (6H, m), 0.75 (3H, d,  $J = 7.0$  Hz);  $^{13}\text{C NMR}$  (125 MHz, Acetone- $d_6$ )  $\delta$  177.25, 175.33, 171.37, 170.42, 170.38, 156.86, 134.61, 134.28, 131.00, 130.82, 128.57, 116.04, 74.91, 71.61, 60.67, 58.36, 57.46, 57.09, 55.56, 54.90, 42.56, 41.13, 39.94, 39.29, 36.92, 31.04, 28.79, 25.33, 23.19, 21.97, 20.61, 20.25, 19.77, 19.15, 16.37; HRMS (ESI)  $m/z$ :  $[\text{M} + \text{H}]^+$  found for 700.4277, calcd for  $\text{C}_{37}\text{H}_{58}\text{N}_5\text{O}_8$  700.4285.

The proton signals 4.95-4.56 (1H, m) in the  $^1\text{H NMR}$  spectrum of compound 1a clearly depicted two sets of signals, which is because of either rotamerism or epimerization during macrolactamization.

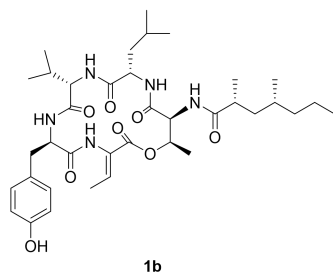

**(2*R*, 4*R*)-*N*-((6*R*, 9*S*, 12*S*, 15*S*, 16*R*, *Z*)-3-ethylidene-6-(4-hydroxybenzyl)-12-isobutyl-9-isopropyl-16-methyl-, 2, 5, 8, 11, 14-pentaoxo-1-oxa-4, 7, 10, 13-tetraazacyclohexadecan-15-yl)-2, 4-dimethylheptanamide (1b):**

White solid, 157.4 mg, 45% yield over four steps;  $R_f = 0.5$  ( $\text{CH}_2\text{Cl}_2/\text{MeOH} = 40:1$ );  $[\alpha]_D^{20} -30.7$  ( $c$  0.65, MeOH);  $^1\text{H NMR}$  (500 MHz, Acetone- $d_6$ )  $\delta$  8.47 (1H, d,  $J = 7.0$  Hz), 8.42 (1H, s), 8.20-8.19 (1H, m), 7.91-7.88 (1H, m), 7.41-7.38 (1H, m), 7.23-7.20 (2H, m), 7.08 (1H, d,  $J = 9.0$  Hz), 6.76 (2H, d,  $J = 8.5$  Hz), 6.61-6.56 (1H, m), 5.23-5.20 (1H, m), 4.89-4.52 (1H, m), 4.43-4.34 (1H, m), 4.22-4.18 (1H, m), 3.83-3.77 (1H, m), 3.34 (1H, t,  $J = 6.5$  Hz), 3.27 (1H, dd,  $J = 3.5, 14.5$  Hz), 3.03-2.94 (1H, m), 2.83 (3H, s), 2.67-2.62 (1H, m), 2.47-2.43 (1H, m), 1.89-1.83 (1H, m), 1.71 (3H, d,  $J = 7.0$  Hz), 1.68-1.64 (1H, m), 1.59-1.53 (1H, m), 1.42-1.39 (1H, m), 1.37 (3H, d,  $J = 6.0$  Hz), 1.24-1.16 (2H, m), 1.07 (3H, d,  $J = 7.0$  Hz), 0.99-0.94 (10H, m), 0.89-0.86 (1H, m), 0.83-0.81 (4H, m), 0.80 (3H, d,  $J = 4.0$  Hz);  $^{13}\text{C NMR}$  (125 MHz, Acetone- $d_6$ )  $\delta$  177.28, 175.36, 171.44, 170.45, 169.72, 165.46, 156.88, 134.44, 130.88, 130.82, 130.42, 128.57, 116.09, 116.00, 74.56, 71.61, 60.65, 57.36, 55.96, 55.00, 42.50, 41.09, 40.28, 39.19, 36.83, 31.19, 28.79, 25.34, 23.17, 22.00, 21.77, 20.57, 19.86, 19.77, 19.27, 16.57, 14.79, 14.51; HRMS (ESI)  $m/z$ :  $[\text{M} + \text{H}]^+$  found for 700.4288, calcd for  $\text{C}_{37}\text{H}_{58}\text{N}_5\text{O}_8$  700.4285.

The proton signals 4.89-4.52 (1H, m) in the  $^1\text{H NMR}$  spectrum of compound 1b clearly depicted two sets of signals, which is because of either rotamerism or epimerization during macrolactamization.

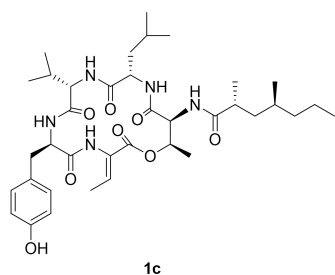

**(2*R*, 4*S*)-*N*-((6*R*, 9*S*, 12*S*, 15*S*, 16*R*, *Z*)-3-ethylidene-6-(4-hydroxybenzyl)-12-isobutyl-9-isopropyl-16-methyl-2, 5, 8, 11, 14-pentaoxo-1-oxa-4, 7, 10, 13-tetraazacyclohexadecan-15-yl)-2, 4-dimethylheptanamide (1c):**

White solid, 150.4 mg, 43% yield over four steps;  $R_f = 0.5$  ( $\text{CH}_2\text{Cl}_2/\text{MeOH} = 40:1$ );  $[\alpha]_D^{20} -16.4$  (c 0.65, MeOH);  $^1\text{H NMR}$  (500 MHz, Acetone- $d_6$ )  $\delta$  8.46 (1H, d,  $J = 7.5$  Hz), 8.42 (1H, s), 8.20-8.18 (1H, m), 7.90-7.88 (1H, m), 7.38 (1H, d,  $J = 8.0$  Hz), 7.20 (2H, d,  $J = 8.0$  Hz), 6.76 (2H, d,  $J = 8.0$  Hz), 6.59 (1H, q,  $J = 7.0$  Hz), 5.94 (1H, d,  $J = 9.0$  Hz), 5.36-5.32 (1H, m), 5.22-5.19 (1H, m), 4.57 (1H, dd,  $J = 3.0, 9.0$  Hz), 4.43-4.39 (1H, m), 4.23-4.19 (1H, m), 3.80-3.79 (2H, m), 3.35-3.30 (2H, m), 3.04-2.94 (1H, m), 2.81 (6H, s), 2.48-2.42 (1H, m), 2.14 (1H, t,  $J = 7.5$  Hz), 1.96 (1H, d,  $J = 8.0$  Hz), 1.89-1.77 (1H, m), 1.70 (3H, d,  $J = 7.0$  Hz), 1.68-1.64 (1H, m), 1.59-1.53 (1H, m), 1.40 (3H, d,  $J = 6.0$  Hz), 1.38-1.36 (1H, m), 1.05 (1H, dd,  $J = 1.5, 7.0$  Hz), 0.98 (6H, t,  $J = 6.0$  Hz), 0.95 (3H, d,  $J = 6.5$  Hz), 0.88 (3H, t,  $J = 7.0$  Hz), 0.84-0.80 (4H, m), 0.78 (2H, d,  $J = 6.0$  Hz);  $^{13}\text{C NMR}$  (125 MHz, Acetone- $d_6$ )  $\delta$  175.28, 171.39, 170.49, 169.98, 165.54, 157.83, 156.84, 134.77, 130.81, 130.58, 130.27, 128.42, 116.05, 74.69, 71.62, 60.67, 57.19, 55.05, 41.02, 30.58, 28.79, 27.77, 26.33, 25.33, 23.32, 23.13, 22.00, 21.74, 20.04, 19.75, 19.19, 16.43, 14.73, 14.30; HRMS (ESI)  $m/z$ :  $[\text{M} + \text{H}]^+$  found for 700.4279, calcd for  $\text{C}_{37}\text{H}_{58}\text{N}_5\text{O}_8$  700.4285.

**4.4 Data of compound 38**

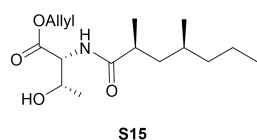

**allyl ((2*S*, 4*S*)-2,4-dimethylheptanoyl)-*D*-threoninate (S15):**

White solid, 2.45 g, 82% yield over two steps;  $R_f = 0.4$  (petroleum/EtOAc = 2:1);  $^1\text{H NMR}$  (500 MHz,  $\text{CDCl}_3$ )  $\delta$  6.38-6.36 (1H, m), 5.92-5.85 (1H, m), 5.34-5.30 (1H, m), 5.24-5.22 (1H, m), 4.64-4.60 (3H, m), 4.36 (1H, s), 3.86-2.68 (1H, m), 2.47-2.40 (1H, m), 1.74-1.68 (1H, m), 1.46-1.37 (1H, m), 1.35-1.29 (1H, m), 1.27-1.21 (2H, m), 1.19 (3H, d,  $J = 6.5$  Hz), 1.14 (3H, d,  $J = 7.0$  Hz), 1.12-1.05 (2H, m), 0.91 (1H, d,  $J = 6.5$  Hz), 0.87 (2H, d,  $J = 6.5$  Hz), 0.84 (3H, t,  $J = 7.0$  Hz);  $^{13}\text{C NMR}$  (125 MHz,  $\text{CDCl}_3$ )  $\delta$  177.53, 171.02, 131.60, 118.94, 68.00, 66.20, 57.14, 41.79, 39.61, 39.36, 30.55, 20.05, 20.01, 19.59, 18.78, 14.36; HRMS (ESI)  $m/z$ :  $[\text{M} + \text{H}]^+$  found for 300.2178, calcd for  $\text{C}_{16}\text{H}_{30}\text{NO}_4$  300.2175.

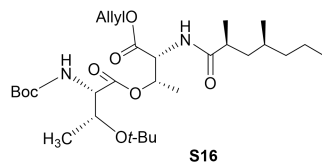

**allyl *O*-(*N*-(*tert*-butoxycarbonyl)-*O*-(*tert*-butyl)-*L*-threonyl)-*N*-((2*S*, 4*S*)-2, 4-dimethylheptanoyl)-*D*-threoninate (S16):**

Colorless oil, 4.36 g, 98% yield;  $R_f = 0.3$  (petroleum/EtOAc = 5:1);  $^1\text{H NMR}$  (500 MHz,  $\text{CDCl}_3$ )  $\delta$  6.24 (1H, d,  $J = 9.0$  Hz), 5.91-5.80 (1H, m), 5.39 (1H, dd,  $J = 2.0, 6.0$  Hz), 5.30-5.19 (3H, m), 4.72 (1H, d,  $J = 7.5$  Hz), 4.61-4.51 (2H, m), 4.07-4.04 (2H, m), 2.48-2.40 (1H, m), 1.75-1.68 (1H, m), 1.42 (9H, s), 1.32-1.29 (1H, m), 1.26 (3H, d,  $J = 6.0$  Hz), 1.24-1.16 (3H, m), 1.14-1.10 (5H, m), 1.09 (9H, s), 1.06-1.02 (1H, m), 0.85 (3H, d,  $J = 6.5$  Hz), 0.81



(3H, t,  $J = 7.0$  Hz);  $^{13}\text{C}$  NMR (125 MHz,  $\text{CDCl}_3$ )  $\delta$  177.34, 170.42, 169.37, 155.87, 131.51, 119.00, 79.87, 74.12, 71.69, 67.32, 66.40, 59.41, 55.33, 41.47, 39.50, 39.16, 30.53, 28.56, 28.42, 20.40, 19.98, 19.65, 17.72, 17.38, 14.32; HRMS (ESI)  $m/z$ :  $[\text{M} + \text{Na}]^+$  found for 579.3619, calcd for  $\text{C}_{29}\text{H}_{52}\text{N}_2\text{O}_8\text{Na}$  579.3621.

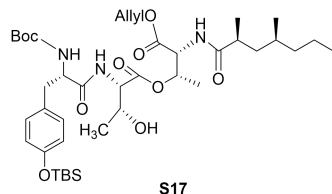

**allyl O-(((S)-2-((tert-butoxycarbonyl)amino)-3-(4-((tert-butyl)dimethylsilyloxy)phenyl)propanoyl)-L-threonyl)-N-((2S, 4S)-2, 4-dimethylheptanoyl)-D-threoninate (S17):**

White amorphous solid, 5.22 g, 96% yield over two steps;  $R_f = 0.4$  (petroleum/EtOAc = 2:1);  $^1\text{H}$  NMR (500 MHz,  $\text{CDCl}_3$ )  $\delta$  7.02 (2H, d,  $J = 6.5$  Hz), 6.92 (1H, d,  $J = 9.0$  Hz), 6.71 (2H, d,  $J = 8.0$  Hz), 6.66 (1H, s), 5.90-5.82 (1H, m), 5.47-5.45 (1H, m), 5.29 (1H, d,  $J = 17.0$  Hz), 5.21 (1H, d,  $J = 10.5$  Hz), 5.11 (1H, s), 4.81 (1H, dd,  $J = 2.0, 9.0$  Hz), 4.61-4.53 (2H, m), 4.49 (1H, d,  $J = 7.0$  Hz), 4.38 (1H, s), 4.25 (1H, s), 3.24 (1H, s), 3.06-3.02 (1H, m), 2.96 (1H, s), 2.54-2.49 (1H, m), 1.76-1.70 (1H, m), 1.40 (1H, d,  $J = 7.5$  Hz), 1.36 (9H, s), 1.32-1.30 (1H, m), 1.26 (3H, d,  $J = 6.5$  Hz), 1.24-1.19 (2H, m), 1.13-1.08 (6H, m), 1.07-0.97 (1H, m), 0.93 (9H, s), 0.90-0.86 (4H, m), 0.83 (3H, t,  $J = 7.0$  Hz), 0.14 (6H, s);  $^{13}\text{C}$  NMR (125 MHz,  $\text{CDCl}_3$ )  $\delta$  177.56, 172.34, 170.18, 169.35, 155.60, 154.67, 131.50, 130.34, 129.07, 120.21, 119.16, 80.27, 71.89, 67.79, 66.73, 57.66, 55.78, 55.15, 41.57, 39.62, 38.99, 36.95, 30.59, 28.28, 25.70, 20.00, 19.57, 19.05, 18.87, 18.19, 17.22, 14.33, -4.42; HRMS (ESI)  $m/z$ :  $[\text{M} + \text{H}]^+$  found for 778.4677, calcd for  $\text{C}_{40}\text{H}_{68}\text{N}_3\text{O}_{10}\text{Si}$  778.4674.

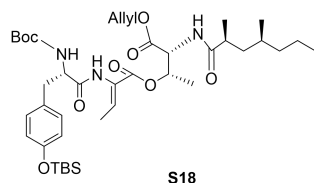

**(2S, 3R)-4-(allyloxy)-3-(((S)-2-((tert-butoxycarbonyl)amino)-3-(4-((tert-butyl)dimethylsilyloxy)phenyl)propanamido)but-2-enoate (S18):**

Yellow solid, 2.87 g, 86% yield;  $R_f = 0.3$  (petroleum/EtOAc = 3:1);  $^1\text{H}$  NMR (500 MHz,  $\text{CDCl}_3$ )  $\delta$  7.33 (1H, s), 7.09 (2H, d,  $J = 8.5$  Hz), 6.76 (2H, d,  $J = 8.0$  Hz), 6.71 (1H, q,  $J = 7.0$  Hz), 6.60 (1H, s), 5.90-5.82 (1H, m), 5.42-5.40 (1H, m), 5.29 (1H, dd,  $J = 1.5, 17.0$  Hz), 5.21 (1H, dd,  $J = 1.0, 10.5$  Hz), 5.00 (1H, d,  $J = 7.5$  Hz), 4.86 (1H, dd,  $J = 3.0, 9.0$  Hz), 4.62 (2H, d,  $J = 5.0$  Hz), 4.43 (1H, s), 3.10-3.05 (2H, m), 2.53 (1H, s), 1.78-1.73 (1H, m), 1.68 (3H, d,  $J = 7.0$  Hz), 1.40 (9H, s), 1.35-1.31 (1H, m), 1.28 (3H, d,  $J = 6.5$  Hz), 1.25-1.20 (2H, m), 1.15 (3H, d,  $J = 7.0$  Hz), 1.12-1.02 (2H, m), 0.95 (9H, s), 0.90 (1H, d,  $J = 6.5$  Hz), 0.86 (3H, d,  $J = 6.5$  Hz), 0.83 (3H, t,  $J = 7.0$  Hz), 0.16 (6H, s);  $^{13}\text{C}$  NMR (125 MHz,  $\text{CDCl}_3$ )  $\delta$  177.54, 170.48, 169.70, 163.02, 154.84, 135.03, 131.62, 130.41, 129.09, 126.27, 120.42, 119.20, 80.59, 72.15, 66.56, 55.53, 41.56, 39.72, 39.04, 36.81, 30.65, 28.36, 25.76, 20.04, 19.66, 19.13, 19.04, 18.28, 17.02, 14.39, -4.35; HRMS (ESI)  $m/z$ :  $[\text{M} + \text{H}]^+$  found for 760.4568, calcd for  $\text{C}_{40}\text{H}_{66}\text{N}_3\text{O}_9\text{Si}$  760.4568.

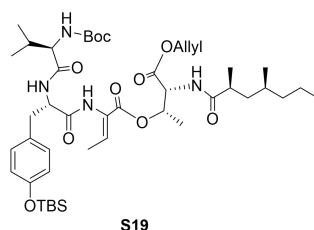

**(2S, 3R)-4-(allyloxy)-3-(((2S, 4S)-2, 4-dimethylheptanamido)-4-oxobutan-2-yl)-9-(4-((tert-butyl)dimethylsilyloxy)phenyl)propanamide (S19):**

**butyldimethylsilyloxy)benzyl)-12-ethylidene-6-isopropyl-2,2-dimethyl-4, 7, 10-trioxo-3-oxa-5, 8, 11-triazatridecan-13-oate (S19):**

White amorphous solid, 3.78 g, 88% over two steps;  $R_f = 0.4$  (petroleum/EtOAc = 2:1);  $^1\text{H NMR}$  (500 MHz,  $\text{CDCl}_3$ )  $\delta$  8.23 (1H, s), 7.76 (1H, d,  $J = 10.0$  Hz), 7.09 (2H, d,  $J = 8.5$  Hz), 6.76 (2H, d,  $J = 8.5$  Hz), 6.75-6.73 (1H, m), 6.03 (1H, d,  $J = 8.5$  Hz), 5.97-5.90 (1H, m), 5.48-5.45 (1H, m), 5.32 (1H, dd,  $J = 1.5, 17.0$  Hz), 5.21 (1H, dd,  $J = 1.0, 10.5$  Hz), 4.95 (1H, dd,  $J = 2.0, 9.5$  Hz), 4.89-4.84 (2H, m), 4.73 (2H, d,  $J = 5.5$  Hz), 3.37 (1H, t,  $J = 6.5$  Hz), 3.20-3.16 (1H, m), 3.11-3.08 (1H, m), 2.83-2.80 (1H, m), 1.86-1.78 (2H, m), 1.69 (3H, d,  $J = 7.0$  Hz), 1.45-1.41 (2H, m), 1.33 (2H, s), 1.28 (9H, s), 1.25-1.22 (1H, m), 1.19 (3H, d,  $J = 6.0$  Hz), 1.14 (3H, d,  $J = 7.0$  Hz), 1.10-1.00 (2H, m), 0.97 (9H, s), 0.94-0.92 (5H, m), 0.85 (3H, t,  $J = 7.0$  Hz), 0.80 (3H, d,  $J = 6.5$  Hz), 0.17 (6H, s);  $^{13}\text{C NMR}$  (125 MHz,  $\text{CDCl}_3$ )  $\delta$  178.29, 172.31, 170.77, 169.51, 163.34, 156.79, 155.05, 135.49, 132.29, 130.38, 129.10, 128.08, 120.62, 118.49, 80.80, 72.11, 66.66, 62.39, 55.26, 54.23, 41.63, 39.97, 38.31, 35.84, 30.72, 29.91, 28.27, 25.80, 20.18, 19.66, 19.25, 19.15, 18.89, 18.33, 16.72, 14.43, 13.42, -4.30; HRMS (ESI)  $m/z$ :  $[\text{M} + \text{H}]^+$  found for 859.5245, calcd for  $\text{C}_{40}\text{H}_{75}\text{N}_6\text{O}_{12}\text{Si}$  859.5252.

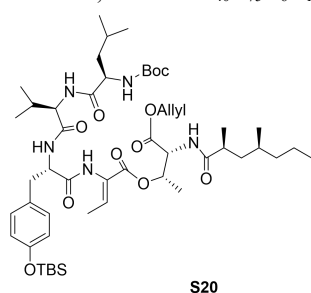

**(2S, 3R)-4-(allyloxy)-3-((2S, 4S)-2, 4-dimethylheptanamido)-4-oxobutan-2-yl (6R, 9R, 12S, Z)-12-(4-((tert-butylidimethylsilyloxy)benzyl)-15-ethylidene-6-isobutyl-9-isopropyl-2, 2-dimethyl-4, 7, 10, 13-tetraoxo-3-oxa-5, 8, 11, 14-tetraazahexadecan-16-oate (S20):**

White amorphous solid, 3.30 g, 85% yield over two steps;  $R_f = 0.5$  (petroleum/EtOAc = 2:1);  $^1\text{H NMR}$  (500 MHz,  $\text{CDCl}_3$ )  $\delta$  8.08 (1H, s), 7.58 (1H, d,  $J = 10.0$  Hz), 7.08 (2H, d,  $J = 8.0$  Hz), 6.78 (1H, s), 6.75-6.71 (3H, m), 6.50 (1H, d,  $J = 7.5$  Hz), 5.93-5.86 (1H, m), 5.50 (1H, d,  $J = 4.5$  Hz), 5.30 (1H, dd,  $J = 1.5, 17.0$  Hz), 5.20 (1H, d,  $J = 10.0$  Hz), 5.05 (1H, d,  $J = 7.0$  Hz), 4.91 (1H, dd,  $J = 2.0, 9.5$  Hz), 4.73 (1H, d,  $J = 5.0$  Hz), 4.65 (2H, d,  $J = 5.5$  Hz), 4.03 (1H, d,  $J = 7.0$  Hz), 3.74 (1H, t,  $J = 6.5$  Hz), 3.24 (1H, dd,  $J = 5.0, 14.0$  Hz), 3.06-3.02 (1H, m), 2.65 (1H, s), 2.03 (2H, s), 1.83-1.77 (1H, m), 1.68 (3H, d,  $J = 7.0$  Hz), 1.57-1.51 (1H, m), 1.48-1.43 (2H, m), 1.38 (9H, s), 1.36-1.30 (2H, m), 1.24 (3H, d,  $J = 6.0$  Hz), 1.23 (1H, s), 1.13 (3H, d,  $J = 7.0$  Hz), 1.09-1.02 (2H, m), 0.96 (9H, s), 0.92-0.90 (4H, m), 0.87-0.82 (11H, m), 0.75 (3H, d,  $J = 6.0$  Hz), 0.15 (6H, s);  $^{13}\text{C NMR}$  (125 MHz,  $\text{CDCl}_3$ )  $\delta$  177.97, 173.87, 171.67, 169.88, 169.84, 163.16, 156.16, 154.84, 135.21, 131.99, 130.22, 129.48, 127.17, 120.44, 118.81, 80.69, 71.71, 66.55, 60.94, 55.35, 55.07, 52.99, 41.53, 40.27, 39.92, 38.57, 35.92, 30.70, 29.63, 28.39, 25.78, 24.69, 22.87, 22.07, 20.10, 19.63, 19.17, 19.07, 18.50, 18.29, 17.06, 14.40, 14.00, -4.34; HRMS (ESI)  $m/z$ :  $[\text{M} + \text{H}]^+$  found for 972.6094, calcd for  $\text{C}_{51}\text{H}_{86}\text{N}_5\text{O}_{11}\text{Si}$  972.6093.

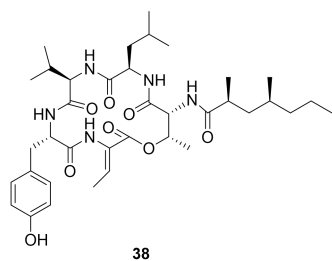

**(2S, 4S)-N-((6S, 9R, 12R, 15R, 16S, Z)-3-ethylidene-6-(4-hydroxybenzyl)-12-isobutyl-9-isopropyl-16-methyl-2, 5, 8, 11, 14-pentaoxo-1-oxa-4, 7, 10, 13-tetraazacyclohexadecan-15-yl)-2, 4-dimethylheptanamide (38):**

White solid, 139.9 mg, 40% yield over four steps;  $R_f = 0.4$  ( $\text{CH}_2\text{Cl}_2/\text{MeOH} = 40:1$ );  $[\alpha]_D^{20} +17.95$  (c 0.65, MeOH);  $^1\text{H NMR}$  (500 MHz, Acetone- $d_6$ )  $\delta$  8.46 (1H, d,  $J = 7.0$  Hz), 8.42 (1H, s), 8.20 (1H, br), 7.89 (1H, s), 7.40 (1H, d,  $J = 7.5$  Hz), 7.22 (2H, d,  $J = 8.5$  Hz), 7.06 (1H, d,  $J = 9.0$  Hz), 6.76 (2H, d,  $J = 8.5$  Hz), 6.58 (1H, q,  $J = 7.0$  Hz), 5.35 (1H, t,  $J = 4.5$  Hz), 5.23-5.21 (1H, m), 4.88 (1H, dd,  $J = 3.0, 9.0$  Hz), 4.40-4.35 (1H, m), 4.22-4.18 (1H, m), 3.35 (1H, t,  $J = 6.5$  Hz), 3.28 (1H, dd,  $J = 3.0, 14.0$  Hz), 3.00 (1H, t,  $J = 13.0$  Hz), 2.67-2.62 (1H, m), 2.48-2.41 (1H, m), 2.15 (1H, t,  $J = 7.0$  Hz), 1.92-1.85 (1H, m), 1.71 (3H, d,  $J = 7.0$  Hz), 1.68-1.64 (1H, m), 1.59-1.54 (2H, m), 1.37 (3H, d,  $J = 6.0$  Hz), 1.23-1.17 (2H, m), 1.06 (3H, d,  $J = 7.0$  Hz), 1.04-1.01 (1H, m), 0.98 (6H, t,  $J = 6.5$  Hz), 0.95 (3H, d,  $J = 6.5$  Hz), 0.92-0.87 (4H, m), 0.82 (3H, t,  $J = 4.0$  Hz), 0.80 (3H, d,  $J = 4.0$  Hz);  $^{13}\text{C NMR}$  (125 MHz, Acetone- $d_6$ )  $\delta$  177.29, 175.36, 171.46, 170.47, 169.78, 165.46, 156.90, 134.48, 130.88, 130.59, 128.59, 116.10, 74.56, 60.67, 57.34, 55.97, 55.03, 42.52, 41.12, 40.30, 39.23, 36.84, 31.21, 27.79, 25.35, 23.18, 22.02, 21.77, 20.58, 19.87, 19.77, 19.27, 16.57, 14.77, 14.51; HRMS (ESI)  $m/z$ :  $[\text{M} + \text{H}]^+$  found for 700.4280, calcd for  $\text{C}_{37}\text{H}_{58}\text{N}_5\text{O}_8$  700.4285.

#### 4.5 Data of compound 39

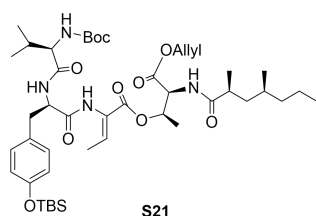

**(2R, 3S)-4-(allyloxy)-3-((2S, 4S)-2, 4-dimethylheptanamido)-4-oxobutan-2-yl (6R, 9R, Z)-9-(4-((tert-butyl)dimethylsilyloxy)benzyl)-12-ethylidene-6-isopropyl-2, 2-dimethyl-4, 7, 10-trioxo-3-oxa-5, 8, 11-triazatridecan-13-oate (S21):**

White amorphous solid, 3.95 g, 92% over two steps;  $R_f = 0.4$  (petroleum/EtOAc = 2:1);  $^1\text{H NMR}$  (500 MHz,  $\text{CDCl}_3$ )  $\delta$  7.78 (1H, d,  $J = 9.0$  Hz), 7.68 (1H, s), 7.06 (2H, d,  $J = 8.5$  Hz), 6.81 (1H, q,  $J = 7.0$  Hz), 6.75 (2H, d,  $J = 8.5$  Hz), 6.45 (1H, d,  $J = 7.5$  Hz), 5.93-5.85 (1H, m), 5.52-5.51 (1H, m), 5.30 (1H, dd,  $J = 1.5, 17.0$  Hz), 5.19 (1H, dd,  $J = 1.0, 10.5$  Hz), 4.97 (1H, dd,  $J = 2.5, 9.5$  Hz), 4.79-4.76 (2H, m), 4.64 (2H, d,  $J = 9.5$  Hz), 3.79 (1H, t,  $J = 4.5$  Hz), 3.27-3.25 (1H, m), 3.01-2.99 (1H, m), 2.82 (1H, s), 2.17-2.11 (1H, m), 1.83-1.77 (1H, m), 1.62 (3H, d,  $J = 7.0$  Hz), 1.43-1.35 (2H, m), 1.31 (9H, s), 1.29-1.26 (2H, m), 1.24 (3H, d,  $J = 6.5$  Hz), 1.22-1.19 (1H, m), 1.16 (3H, d,  $J = 7.0$  Hz), 1.09-1.01 (2H, m), 0.96 (9H, s), 0.94 (3H, d,  $J = 7.0$  Hz), 0.89-0.87 (5H, m), 0.84 (3H, t,  $J = 7.5$  Hz), 0.16 (6H, d,  $J = 3.0$  Hz);  $^{13}\text{C NMR}$  (125 MHz,  $\text{CDCl}_3$ )  $\delta$  178.10, 171.33, 169.79, 169.46, 163.13, 156.70, 155.09, 136.00, 132.07, 130.36, 128.73, 126.89, 120.58, 118.73, 81.32, 72.30, 66.45, 61.58, 55.22, 53.82, 41.72, 39.98, 38.25, 35.98, 30.51, 29.98, 28.20, 25.74, 20.10, 19.67, 19.62, 19.34, 18.26, 17.73, 16.60, 14.48, 14.10, -4.33; HRMS (ESI)  $m/z$ :  $[\text{M} + \text{H}]^+$  found for 859.5251, calcd for  $\text{C}_{40}\text{H}_{75}\text{N}_6\text{O}_{12}\text{Si}$  859.5252.

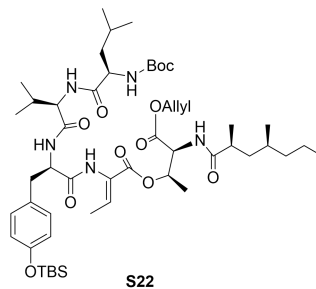

**(2R, 3S)-4-(allyloxy)-3-((2S, 4S)-2, 4-dimethylheptanamido)-4-oxobutan-2-yl (6R, 9R, 12R, Z)-12-(4-((tert-butyl)dimethylsilyloxy)benzyl)-15-ethylidene-6-isobutyl-9-isopropyl-2, 2-dimethyl-4, 7, 10, 13-tetraoxo-3-oxa-5, 8, 11, 14-tetraazahexadecan-16-oate (S22):**

White amorphous solid, 3.61 g, 93% yield over two steps;  $R_f = 0.5$  (petroleum/EtOAc = 2:1);  $^1\text{H NMR}$  (500 MHz,  $\text{CDCl}_3$ )  $\delta$  8.07 (1H, s), 7.80 (1H, d,  $J = 9.0$  Hz), 7.09 (2H, d,  $J = 8.0$  Hz), 6.88 (1H, d,  $J = 8.0$  Hz), 6.76-6.72 (2H, m), 6.70 (2H, d,  $J = 8.0$  Hz), 5.94-5.86 (1H, m), 5.51 (1H, q,  $J = 6.0$  Hz), 5.28 (1H, d,  $J = 17.5$  Hz), 5.15 (1H, d,  $J = 10.5$  Hz), 5.05 (1H, s), 4.96 (2H, d,  $J = 9.0$  Hz), 4.72-4.63 (2H, m), 3.99 (1H, t,  $J = 4.0$  Hz), 3.90-3.86 (1H, m), 3.38 (1H, d,  $J = 12.0$  Hz), 2.94-2.89 (2H, m), 2.15-2.11 (1H, m), 2.05-2.02 (1H, m), 1.82-1.77 (1H, m), 1.73 (3H, d,  $J = 7.0$  Hz), 1.68-1.63 (1H, m), 1.57-1.52 (1H, m), 1.50-1.43 (1H, m), 1.42 (9H, s), 1.34-1.28 (2H, m), 1.23 (3H, d,  $J = 6.5$  Hz), 1.15 (3H, d,  $J = 6.5$  Hz), 1.08-0.99 (2H, m), 0.95 (9H, s), 0.92 (3H, d,  $J = 6.5$  Hz), 0.89 (3H, d,  $J = 6.0$  Hz), 0.87 (3H, d,  $J = 6.5$  Hz), 0.84-0.81 (3H, m), 0.76 (3H, d,  $J = 7.0$  Hz), 0.13 (6H, s);  $^{13}\text{C NMR}$  (125 MHz,  $\text{CDCl}_3$ )  $\delta$  178.24, 174.53, 170.80, 170.75, 169.37, 163.42, 156.75, 154.50, 134.82, 132.28, 130.05, 129.75, 127.78, 120.24, 118.45, 81.50, 72.16, 66.51, 60.68, 55.13, 54.48, 53.96, 41.74, 39.98, 38.08, 35.69, 30.48, 29.28, 28.37, 25.77, 24.89, 22.95, 21.69, 20.09, 19.65, 19.61, 19.19, 18.30, 17.54, 16.77, 14.45, 13.64, -4.37; HRMS (ESI)  $m/z$ :  $[\text{M} + \text{H}]^+$  found for 972.6094, calcd for  $\text{C}_{51}\text{H}_{86}\text{N}_5\text{O}_{11}\text{Si}$  972.6093.

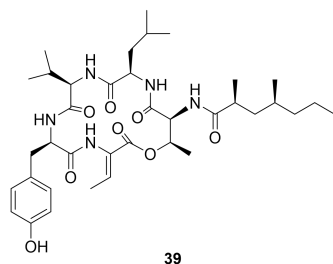

**(2S, 4S)-N-((6R, 9R, 12R, 15S, 16R, Z)-3-ethylidene-6-(4-hydroxybenzyl)-12-isobutyl-9-isopropyl-16-methyl-2, 5, 8, 11, 14-pentaoxo-1-oxa-4, 7, 10, 13-tetraazacyclohexadecan-15-yl)-2, 4-dimethylheptanamide (39):**

White solid, 160.9 mg, 46% yield over four steps;  $R_f = 0.4$  ( $\text{CH}_2\text{Cl}_2/\text{MeOH} = 40:1$ );  $[\alpha]_D^{20} +6.8$  (c 0.65, MeOH);  $^1\text{H NMR}$  (500 MHz, Acetone- $d_6$ )  $\delta$  8.14 (1H, d,  $J = 25.0$  Hz), 8.07 (1H, s), 7.79 (1H, s), 7.48 (1H, s), 7.20-7.18 (3H, m), 6.76 (2H, d,  $J = 8.0$  Hz), 6.61 (1H, q,  $J = 7.0$  Hz), 5.23 (1H, s), 4.77 (1H, s), 4.48 (1H, s), 4.05 (1H, s), 3.86 (1H, s), 3.33 (1H, dd,  $J = 3.5, 14.0$  Hz), 3.00 (1H, t,  $J = 13.0$  Hz), 2.70 (2H, q,  $J = 7.0$  Hz), 2.03-2.01 (2H, m), 1.76-1.76 (2H, m), 1.66 (3H, d,  $J = 7.0$  Hz), 1.61-1.49 (1H, m), 1.42-1.37 (1H, m), 1.33 (3H, d,  $J = 6.0$  Hz), 1.25-1.19 (2H, m), 1.15 (3H, d,  $J = 6.5$  Hz), 1.03 (1H, s), 0.95 (3H, d,  $J = 6.5$  Hz), 0.92 (3H, d,  $J = 6.5$  Hz), 0.90-0.87 (4H, m), 0.84 (3H, t,  $J = 7.0$  Hz), 0.72 (3H, d,  $J = 6.5$  Hz), 0.67 (3H, d,  $J = 6.5$  Hz);  $^{13}\text{C NMR}$  (125 MHz, Acetone- $d_6$ )  $\delta$  173.96, 171.40, 170.40, 169.25, 165.10, 156.99, 133.93, 130.94, 130.10, 128.26, 116.04, 74.00, 62.02, 56.87, 56.12, 54.36, 42.67, 40.06, 39.49, 36.73, 32.63, 31.12, 25.72, 23.80, 21.31, 20.69, 20.31, 19.35, 19.10, 18.46, 16.72, 14.88, 14.56; HRMS (ESI)  $m/z$ :  $[\text{M} + \text{H}]^+$  found for 700.4282, calcd for  $\text{C}_{37}\text{H}_{58}\text{N}_5\text{O}_8$  700.4285.

**4.6 Data of compound 40**

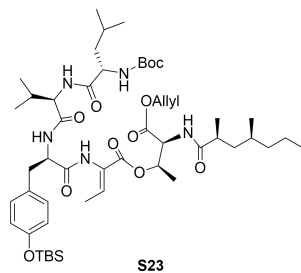

**(2R, 3S)-4-(allyloxy)-3-((2S, 4S)-2, 4-dimethylheptanamido)-4-oxobutan-2-yl (6S, 9R, 12R, Z)-12-(4-((tert-butyl dimethylsilyloxy)benzyl)-15-ethylidene-6-isobutyl-9-isopropyl-2, 2-dimethyl-4, 7, 10, 13-tetraoxo-3-oxa-5, 8, 11, 14-tetraazahexadecan-16-oate (S23):**

White amorphous solid, 3.61 g, 93% yield over two steps;  $R_f = 0.5$  (petroleum/EtOAc = 2:1);  $^1\text{H NMR}$  (500 MHz,  $\text{CDCl}_3$ )  $\delta$  7.95 (1H, s), 7.84 (1H, d,  $J = 9.5$  Hz), 7.16 (2H, d,  $J = 8.0$  Hz), 7.04 (1H, d,  $J = 6.5$  Hz), 6.75 (2H, d,  $J = 8.0$  Hz), 6.70 (1H, q,  $J = 7.0$  Hz), 6.34 (1H, s), 5.96-5.88 (1H, m), 5.53-5.50 (1H, m), 5.30 (1H, dd,  $J = 1.5, 17.0$  Hz), 5.19 (1H, dd,  $J = 1.0, 10.5$  Hz), 4.98 (1H, dd,  $J = 2.5, 9.5$  Hz), 4.89 (1H, s), 4.84-4.80 (1H, m), 4.70 (2H, d,  $J = 5.5$  Hz), 4.06-4.04 (1H, m), 3.88 (1H, s), 3.33 (1H, d,  $J = 12.0$  Hz), 2.97 (1H, t,  $J = 11.0$  Hz), 2.85-2.81 (1H, m), 2.26-2.23 (1H, m), 1.83 (1H, s), 1.81-1.77 (1H, m), 1.74 (3H, d,  $J = 7.5$  Hz), 1.63-1.56 (2H, m), 1.45 (9H, s), 1.36-1.26 (3H, m), 1.24 (3H, d,  $J = 6.0$  Hz), 1.21-1.18 (1H, m), 1.15 (3H, d,  $J = 7.0$  Hz), 1.09-0.99 (2H, m), 0.97 (9H, s), 0.96-0.95 (3H, m), 0.91 (3H, d,  $J = 6.0$  Hz), 0.87 (3H, d,  $J = 7.0$  Hz), 0.84 (6H, t,  $J = 7.0$  Hz), 0.63 (3H, d,  $J = 6.5$  Hz), 0.15 (6H, d,  $J = 2.5$  Hz);  $^{13}\text{C NMR}$  (125 MHz,  $\text{CDCl}_3$ )  $\delta$  178.21, 174.66, 170.74, 170.59, 169.42, 163.42, 156.51, 154.58, 134.03, 132.32, 130.60, 130.17, 127.82, 120.34, 118.53, 81.25, 72.29, 66.52, 60.28, 55.09, 54.85, 54.28, 41.78, 40.05, 38.16, 35.37, 30.48, 28.96, 28.62, 25.79, 24.78, 22.71, 22.31, 20.13, 19.69, 19.59, 19.43, 18.31, 16.90, 16.78, 14.48, 13.71, -4.34; HRMS (ESI)  $m/z$ :  $[\text{M} + \text{H}]^+$  found for 972.6090, calcd for  $\text{C}_{51}\text{H}_{86}\text{N}_5\text{O}_{11}\text{Si}$  972.6093.

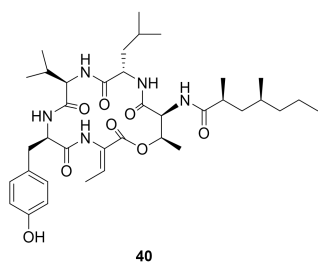

**(2S, 4S)-N-((6R, 9R, 12S, 15S, 16R,Z)-3-ethylidene-6-(4-hydroxybenzyl)-12-isobutyl-9-isopropyl-16-methyl-2, 5, 8, 11, 14-pentaoxo-1-oxa-4, 7, 10, 13-tetraazacyclohexadecan-15-yl)-2, 4-dimethylheptanamide (40):**

White solid, 160.9 mg, 46% yield over four steps;  $R_f = 0.4$  ( $\text{CH}_2\text{Cl}_2/\text{MeOH} = 40:1$ );  $[\alpha]_D^{20} +29.18$  (c 0.65, MeOH);  $^1\text{H NMR}$  (500 MHz, Acetone- $d_6$ )  $\delta$  8.14 (1H, br), 8.03-8.00 (2H, m), 7.94 (1H, s), 7.48 (1H, d,  $J = 9.0$  Hz), 7.20 (2H, d,  $J = 8.5$  Hz), 7.01 (1H, d,  $J = 9.0$  Hz), 6.73 (2H, d,  $J = 8.5$  Hz), 6.59 (1H, q,  $J = 7.0$  Hz), 5.18-5.13 (1H, m), 4.94 (1H, dd,  $J = 3.0, 9.0$  Hz), 4.48-4.43 (1H, m), 4.33-4.30 (1H, m), 3.86 (1H, t,  $J = 4.5$  Hz), 3.31 (1H, dd,  $J = 3.5, 14.0$  Hz), 3.01 (1H, t,  $J = 13.5$  Hz), 2.67-2.63 (1H, m), 2.16-2.13 (1H, m), 1.78-1.71 (1H, m), 1.68 (3H, d,  $J = 7.0$  Hz), 1.63-1.52 (3H, m), 1.42-1.37 (1H, m), 1.35 (3H, d,  $J = 6.5$  Hz), 1.21-1.14 (3H, m), 1.06 (3H, d,  $J = 7.0$  Hz), 1.04-1.02 (1H, m), 0.98 (3H, d,  $J = 6.5$  Hz), 0.96-0.92 (1H, m), 0.89 (3H, d,  $J = 6.5$  Hz), 0.86 (3H, d,  $J = 7.0$  Hz), 0.79 (3H, t,  $J = 7.0$  Hz), 0.76 (3H, d,  $J = 6.5$  Hz), 0.60 (3H, d,  $J = 7.0$  Hz);  $^{13}\text{C NMR}$  (125 MHz, Acetone- $d_6$ )  $\delta$  177.27, 176.66, 171.43, 171.27, 169.47, 165.33, 156.89, 134.75, 130.98, 130.34, 128.46, 115.93, 75.21, 61.81, 56.74, 55.59, 54.51, 42.51, 40.82, 40.00, 39.24, 36.69, 31.06, 29.38, 25.25, 23.00, 22.59, 20.63, 20.28, 19.26, 19.17, 17.17, 16.32, 14.75, 14.62;  $^1\text{H NMR}$  (500 MHz,  $\text{CD}_3\text{OD}$ )  $\delta$  7.19 (2H, d,  $J = 8.5$  Hz), 6.80 (1H, q,  $J = 7.0$  Hz), 6.70 (2H, d,  $J = 8.5$  Hz), 5.18-5.13 (1H, m), 4.72 (1H, d,  $J = 3.0$  Hz), 4.49 (1H, dd,  $J = 3.5, 13.0$  Hz), 4.32 (1H, t,  $J = 7.5$  Hz), 3.83 (1H, d,  $J = 4.0$  Hz), 3.39-3.35 (1H, m), 3.09 (1H, t,  $J = 13.0$  Hz), 2.64-2.58 (1H, m), 2.10-2.07 (1H, m), 1.74 (3H, d,  $J = 7.0$  Hz), 1.69-1.64 (2H, m), 1.61-1.46 (2H, m), 1.43 (3H, d,  $J = 6.0$  Hz), 1.32 (1H, s), 1.24-1.14 (2H, m), 1.10 (3H, d,  $J = 7.0$  Hz), 1.07-1.03 (1H, m), 1.01 (3H, d,  $J = 6.5$  Hz), 0.95 (3H, d,  $J = 6.5$  Hz), 0.92-0.85 (2H, m), 0.83-0.79 (6H, m), 0.70 (3H, d,  $J = 6.5$  Hz), 0.61 (3H, d,  $J = 7.0$  Hz);  $^{13}\text{C NMR}$  (125 MHz,  $\text{CD}_3\text{OD}$ )  $\delta$  180.25, 178.57, 173.80, 172.08, 171.50, 165.43, 157.38, 138.10, 131.45, 129.91, 127.63, 116.35, 75.55, 62.42, 57.29, 56.84, 54.55, 42.51, 41.02, 40.33, 39.56, 36.72, 31.51, 29.99, 25.81, 22.99, 22.81, 20.99, 20.36, 19.27, 19.21, 17.28, 16.33, 14.66, 14.55; HRMS (ESI)  $m/z$ :  $[\text{M} + \text{H}]^+$  found for 700.4282, calcd for  $\text{C}_{37}\text{H}_{58}\text{N}_5\text{O}_8$  700.4285.

## 5. NMR Comparison Tables of Tumescenamide A

Table S3. <sup>1</sup>H NMR comparison for Tumescenamide A

| Natural Tumescenamide A<br>(500 MHz, acetone-d <sub>6</sub> ) | Synthetic Tumescenamide A (compound <b>40</b> )<br>(500 MHz, acetone-d <sub>6</sub> ) |
|---------------------------------------------------------------|---------------------------------------------------------------------------------------|
| 8.20, br                                                      | 8.14, br                                                                              |
| 8.02, d (J = 3.9 Hz)                                          | 8.02, m                                                                               |
| 7.98, s                                                       |                                                                                       |
| 7.92, d (J = 2.0 Hz)                                          | 7.94, s                                                                               |
| 7.48, d (J = 8.6 Hz)                                          | 7.48, d (J = 8.6 Hz)                                                                  |
| 7.19, d (J = 8.4 Hz)                                          | 7.20, d (J = 8.4 Hz)                                                                  |
| 7.04, d (J = 9.0 Hz)                                          | 7.01, d (J = 9.0 Hz)                                                                  |
| 6.71, d (J = 8.4 Hz)                                          | 6.73, d (J = 8.4 Hz)                                                                  |
| 6.57, q (J = 7.1 Hz)                                          | 6.58, q (J = 7.1 Hz)                                                                  |
| 5.15, dq (J = 3.2, 6.1 Hz)                                    | 5.15, dq (J = 3.1, 6.1 Hz)                                                            |
| 4.92, dd (J = 3.2, 9.0 Hz)                                    | 4.93, dd (J = 3.0, 9.0 Hz)                                                            |
| 4.45, m                                                       | 4.45, m                                                                               |
| 4.29, dd (J = 7.6, 7.6 Hz)                                    | 4.30, dd (J = 7.6, 7.6 Hz)                                                            |
| 3.85, dd (J = 3.9, 3.9 Hz)                                    | 3.85, dd (J = 4.0, 5.1 Hz)                                                            |
| 3.29, dd (J = 3.4, 13.9 Hz)                                   | 3.30, dd (J = 3.4, 14.0 Hz)                                                           |
| 2.99, dd (J = 13.7, 13.7 Hz)                                  | 3.00, t (J = 13.6 Hz)                                                                 |
| 2.65, m                                                       | 2.65, m                                                                               |
| 2.12, m                                                       | 2.13, m                                                                               |
| 1.72, m                                                       | 1.72, m                                                                               |
| 1.67, d (J = 7.1 Hz)                                          | 1.68, d (J = 7.0 Hz)                                                                  |
| 1.67, m                                                       | 1.58, m                                                                               |
| 1.58, m                                                       |                                                                                       |
| 1.52, m                                                       |                                                                                       |
| 1.38, m                                                       | 1.38, m                                                                               |
| 1.34, d (J = 6.4 Hz)                                          | 1.35, d (J = 6.3 Hz)                                                                  |
| 1.20, m                                                       | 1.18, m                                                                               |
| 1.18, m                                                       |                                                                                       |
| 1.14, m                                                       |                                                                                       |
| 1.04, d (J = 6.8 Hz)                                          | 1.06, d (J = 6.9 Hz)                                                                  |
| 1.02, m                                                       | 1.02, m                                                                               |
| 0.98, d (J = 6.6 Hz)                                          | 0.98, d (J = 6.6 Hz)                                                                  |
| 0.92, m                                                       | 0.92, m                                                                               |
| 0.88, d (J = 7.1 Hz)                                          | 0.89, d (J = 6.6 Hz)                                                                  |
| 0.86, d (J = 7.1 Hz)                                          | 0.86, d (J = 7.1 Hz)                                                                  |
| 0.78, t (J = 7.1 Hz)                                          | 0.79, t (J = 7.1 Hz)                                                                  |
| 0.76, d (J = 6.6 Hz)                                          | 0.76, d (J = 6.6 Hz)                                                                  |
| 0.58, d (J = 7.1 Hz)                                          | 0.60, d (J = 7.1 Hz)                                                                  |

**Table S4. <sup>13</sup>C NMR comparison for Tumescenamide A**

| Natural Tumescenamide A<br>(125 MHz, CD <sub>3</sub> OD) | Synthetic Tumescenamide A (compound <b>40</b> )<br>(125 MHz, CD <sub>3</sub> OD) |
|----------------------------------------------------------|----------------------------------------------------------------------------------|
| 177.3                                                    | 177.3                                                                            |
| 176.6                                                    | 176.6                                                                            |
| 171.3                                                    | 171.3                                                                            |
| 171.2                                                    | 171.2                                                                            |
| 169.5                                                    | 169.5                                                                            |
| 165.3                                                    | 165.2                                                                            |
| 156.8                                                    | 156.8                                                                            |
| 134.8                                                    | 134.8                                                                            |
| 130.9                                                    | 130.9                                                                            |
| 130.0                                                    | 130.2                                                                            |
| 128.0                                                    | 128.4                                                                            |
| 115.8                                                    | 115.9                                                                            |
| 75.1                                                     | 75.1                                                                             |
| 61.7                                                     | 61.7                                                                             |
| 56.7                                                     | 56.7                                                                             |
| 55.5                                                     | 55.5                                                                             |
| 54.4                                                     | 54.4                                                                             |
| 42.7                                                     | 42.4                                                                             |
| 40.7                                                     | 40.7                                                                             |
| 39.9                                                     | 39.9                                                                             |
| 39.1                                                     | 39.2                                                                             |
| 36.6                                                     | 36.6                                                                             |
| 31.0                                                     | 31.0                                                                             |
| 29.2                                                     | 29.3                                                                             |
| 25.2                                                     | 25.2                                                                             |
| 22.9                                                     | 22.9                                                                             |
| 22.5                                                     | 22.5                                                                             |
| 20.6                                                     | 20.6                                                                             |
| 20.2                                                     | 20.2                                                                             |
| 19.2                                                     | 19.2                                                                             |
| 19.1                                                     | 19.1                                                                             |
| 17.0                                                     | 17.1                                                                             |
| 16.2                                                     | 16.2                                                                             |
| 14.7                                                     | 14.7                                                                             |
| 14.6                                                     | 14.5                                                                             |

## 6. NMR Comparison Tables of Tumescenamide C

Table S5. <sup>1</sup>H NMR comparison for Tumescenamide C

| Reported Tumescenamide C <sup>7</sup><br>(500 MHz, CD <sub>3</sub> OD) | Synthetic Tumescenamide C (compound 40)<br>(500 MHz, CD <sub>3</sub> OD) |
|------------------------------------------------------------------------|--------------------------------------------------------------------------|
| 7.18, d (J = 8.5 Hz)                                                   | 7.19, d (J = 8.5 Hz)                                                     |
| 6.79, q (J = 7.0 Hz)                                                   | 6.80, q (J = 7.0 Hz)                                                     |
| 6.69, d (J = 8.5 Hz)                                                   | 6.70, d (J = 8.5 Hz)                                                     |
| 5.15, dq (J = 3.5, 6.5 Hz)                                             | 5.18-5.13, m                                                             |
| 4.72, dd (J = 3.0, 8.5 Hz)                                             | 4.72, d (J = 3.0 Hz)                                                     |
| 4.48, dd (J = 3.5, 12.5 Hz)                                            | 4.49, dd (J = 3.5, 13.0 Hz)                                              |
| 4.31, dd (J = 7.5, 8.0 Hz)                                             | 4.32, t (J = 7.5 Hz)                                                     |
| 3.82, d (J = 4.0 Hz)                                                   | 3.83, d (J = 4.0 Hz)                                                     |
| 3.37, m                                                                | 3.39-3.35, m                                                             |
| 3.20, m                                                                |                                                                          |
| 3.08, dd (J = 13.0, 13.5 Hz)                                           | 3.09, t (J = 13.0 Hz)                                                    |
| 2.61, m                                                                | 2.64-2.58, m                                                             |
| 2.08, m                                                                | 2.10-2.07, m                                                             |
| 1.73, d (J = 6.5 Hz)                                                   | 1.74, d (J = 7.0 Hz)                                                     |
| 1.65, m                                                                | 1.69-1.64, m                                                             |
| 1.60-1.47, overlapped                                                  | 1.61-1.46, m                                                             |
| 1.42, d (J = 9.0 Hz)                                                   | 1.43, d (J = 6.0 Hz)                                                     |
| 1.32, m                                                                | 1.32, s                                                                  |
| 1.24-1.10, overlapped                                                  | 1.24-1.14, m                                                             |
| 1.09, d (J = 7.0 Hz)                                                   | 1.10, d (J = 7.0 Hz)                                                     |
| 1.05, m                                                                | 1.07-1.03, m                                                             |
| 1.00, d (J = 6.0 Hz)                                                   | 1.01, d (J = 6.5 Hz)                                                     |
| 0.94, d (J = 6.5 Hz)                                                   | 0.95, d (J = 6.5 Hz)                                                     |
| 0.88, m                                                                | 0.92-0.85, m                                                             |
| 0.81, d (J = 7.0 Hz)                                                   | 0.83-0.79, m                                                             |
| 0.79, t (J = 7.0 Hz)                                                   |                                                                          |
| 0.69, d (J = 7.0 Hz)                                                   | 0.70, d (J = 6.5 Hz)                                                     |
| 0.60, d (J = 7.0 Hz)                                                   | 0.61, d (J = 7.0 Hz)                                                     |



**Table S6. <sup>13</sup>C NMR comparison for Tumescenamide C**

| Reported Tumescenamide C <sup>7</sup><br>(125 MHz, CD <sub>3</sub> OD) | Synthetic Tumescenamide C (compound <b>40</b> )<br>(125 MHz, CD <sub>3</sub> OD) |
|------------------------------------------------------------------------|----------------------------------------------------------------------------------|
| 180.3                                                                  | 180.3                                                                            |
| 178.6                                                                  | 178.6                                                                            |
| 173.8                                                                  | 173.8                                                                            |
| 172.1                                                                  | 172.1                                                                            |
| 171.5                                                                  | 171.5                                                                            |
| 165.4                                                                  | 165.4                                                                            |
| 157.4                                                                  | 157.4                                                                            |
| 138.1                                                                  | 138.1                                                                            |
| 131.5                                                                  | 131.5                                                                            |
| 129.9                                                                  | 129.9                                                                            |
| 127.6                                                                  | 127.6                                                                            |
| 116.3                                                                  | 116.4                                                                            |
| 75.5                                                                   | 75.6                                                                             |
| 62.4                                                                   | 62.4                                                                             |
| 57.3                                                                   | 57.3                                                                             |
| 56.9                                                                   | 56.8                                                                             |
| 54.5                                                                   | 54.6                                                                             |
| 42.5                                                                   | 42.5                                                                             |
| 41.0                                                                   | 41.0                                                                             |
| 40.3                                                                   | 40.3                                                                             |
| 39.5                                                                   | 39.6                                                                             |
| 36.7                                                                   | 36.7                                                                             |
| 31.5                                                                   | 31.5                                                                             |
| 30.0                                                                   | 30.0                                                                             |
| 25.8                                                                   | 25.8                                                                             |
| 23.0                                                                   | 23.0                                                                             |
| 22.8                                                                   | 22.8                                                                             |
| 21.0                                                                   | 21.0                                                                             |
| 20.4                                                                   | 20.4                                                                             |
| 19.3                                                                   | 19.3                                                                             |
| 19.2                                                                   | 19.2                                                                             |
| 17.2                                                                   | 17.3                                                                             |
| 16.3                                                                   | 16.3                                                                             |
| 14.7                                                                   | 14.7                                                                             |
| 14.6                                                                   | 14.6                                                                             |

# 7. NMR Spectra of Products

liushouxin-XH

7.405  
7.391  
7.376  
7.346  
7.331  
7.321  
7.317  
7.274  
7.260

4.755  
4.749  
4.740  
4.734  
4.729  
4.723  
4.714  
4.708  
4.271  
4.253  
4.237  
4.230  
4.224  
4.212  
4.206  
3.371  
3.365  
3.345  
3.338  
3.068  
3.052  
3.034  
3.021  
3.018  
3.004  
2.991  
2.977  
2.975  
2.961  
2.943  
2.927  
2.849  
2.830  
2.823  
2.804  
1.786  
1.774  
1.766  
1.759  
1.750  
1.743  
1.736  
1.730  
1.720  
1.713  
1.706  
1.699  
1.513  
1.498  
1.483  
1.468  
1.453  
1.438  
1.030  
1.015

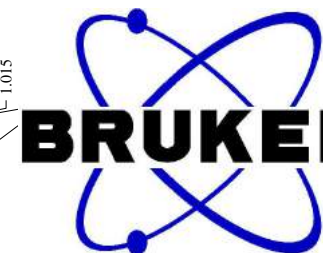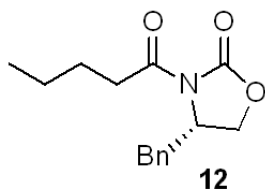

```

NAME          2019.07.23
EXPNO         7
PROCNO        1
Date_         20190723
Time          19.49
INSTRUM       spect
PROBHD        5 mm PADUL 13C
PULPROG       zg30
TD            65536
SOLVENT       CDCl3
NS            8
DS            0
SWH           7500.000
FIDRES        0.114441
AQ            4.3691168
RG            114
DW            66.667
DE            6.50
TE            298.4
D1            1.00000000
TD0           1
    
```

```

===== CHANNEL f1 =====
NUC1          1H
P1            13.50
PL1           2.00
PL1W         16.79986763
SFO1         500.1332508
SI            32768
SF           500.1299921
WDW           EM
SSB           0
LB            1.00
GB            0
PC            1.00
    
```

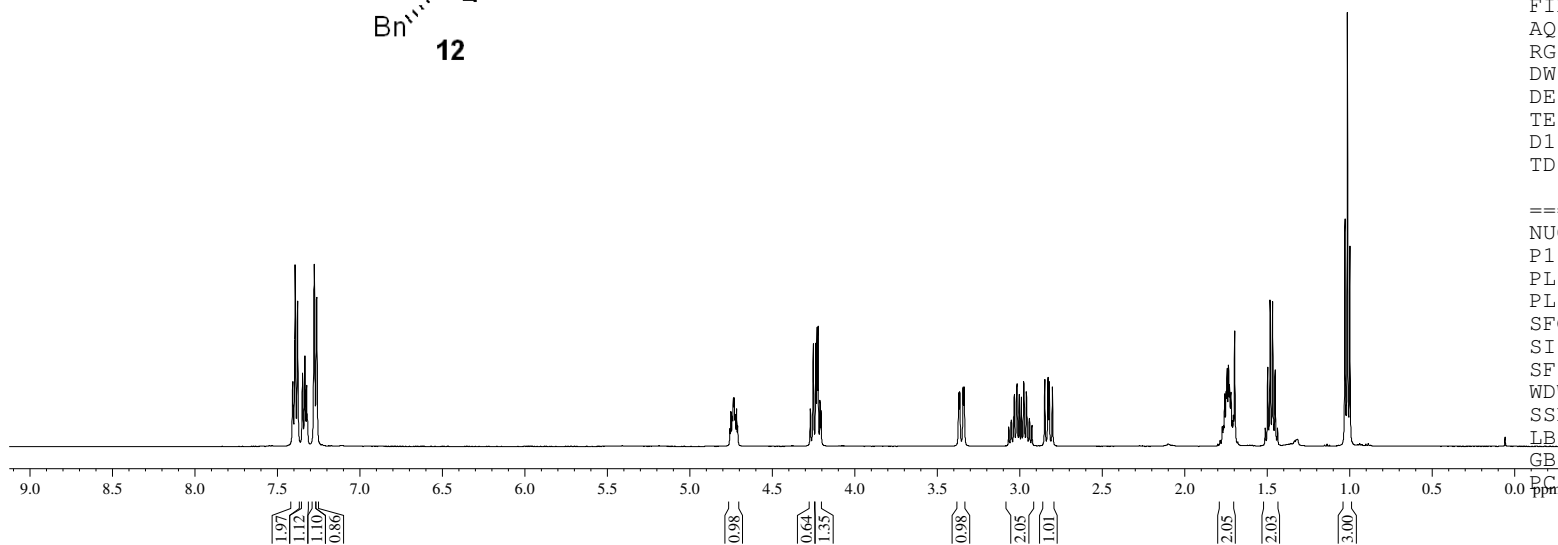

XH

— 173.55  
— 153.58  
— 135.48  
— 129.54  
— 129.06  
— 127.45  
  
77.41  
77.16  
76.91  
— 66.27  
— 55.27  
— 38.07  
— 35.37  
— 26.49  
— 22.38  
— 13.96

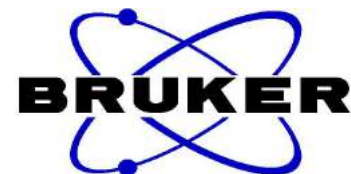

NAME 2019.07.24  
EXPNO 4  
PROCNO 1  
Date\_ 20190724  
Time 13.42  
INSTRUM spect  
PROBHD 5 mm PADUL 13C  
PULPROG zgpg30  
TD 32768  
SOLVENT CDC13  
NS 4096  
DS 4  
SWH 29761.904 Hz  
FIDRES 0.908261 Hz  
AQ 0.5505524 sec  
RG 2050  
DW 16.800 usec  
DE 6.50 usec  
TE 300.9 K  
D1 2.0000000 sec  
D11 0.0300000 sec  
TD0 1

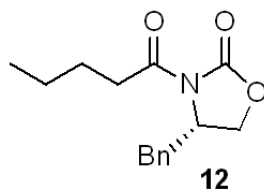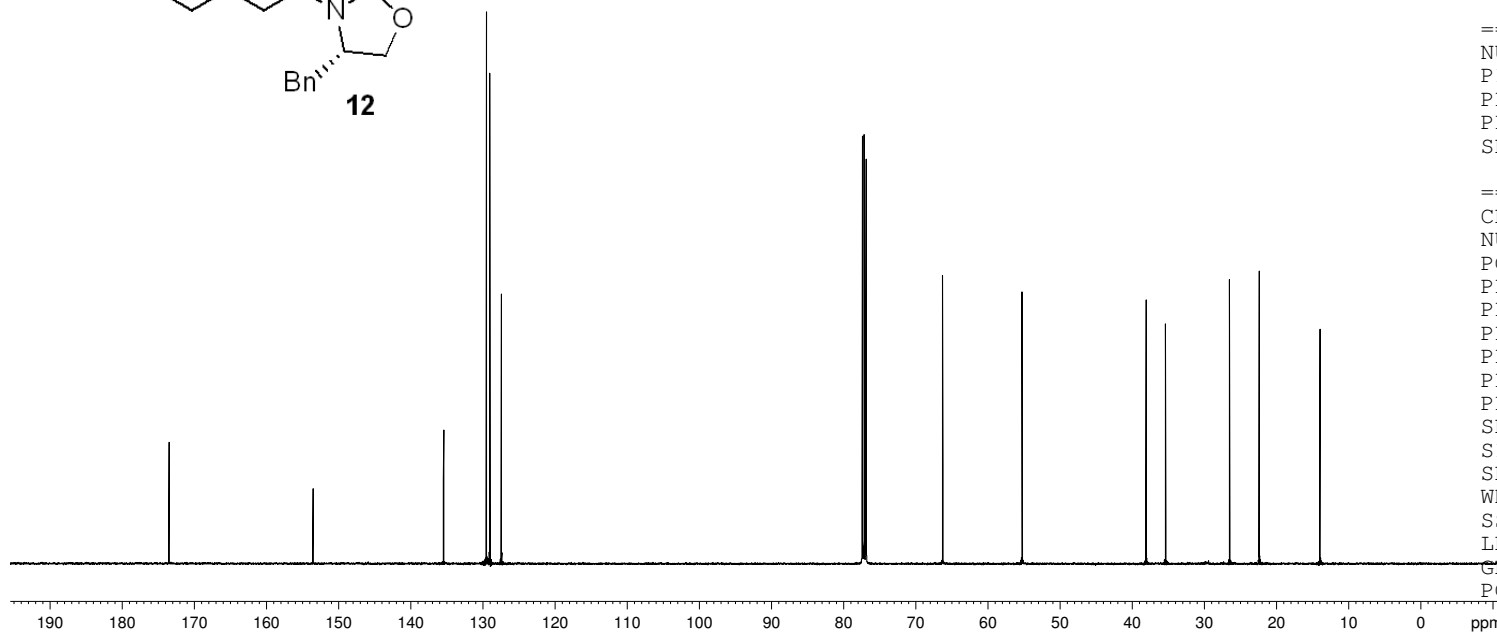

==== CHANNEL f1 =====  
NUC1 13C  
P1 12.00 usec  
PL1 4.50 dB  
PL1W 33.60015869 W  
SFO1 125.7703643 MHz

==== CHANNEL f2 =====  
CPDPRG2 waltz16  
NUC2 1H  
PCPD2 80.00 usec  
PL2 2.00 dB  
PL12 17.46 dB  
PL13 17.46 dB  
PL2W 16.79986763 W  
PL12W 0.47786582 W  
PL13W 0.47786582 W  
SFO2 500.1320005 MHz  
SI 32768  
SF 125.7577765 MHz  
WDW EM  
SSB 0  
LB 1.00 Hz  
GB 0  
PC 1.40

liushouxin-xh-Me

7.344  
7.329  
7.314  
7.285  
7.271  
7.261  
7.221  
7.206

4.691  
4.675  
4.657  
4.214  
4.196  
4.180  
4.174  
4.169  
4.156  
3.764  
3.751  
3.737  
3.724  
3.710  
3.697  
3.285  
3.280  
3.258  
3.253  
2.791  
2.772  
2.765  
2.745  
1.764  
1.751  
1.738  
1.732  
1.724  
1.708  
1.694  
1.600  
1.439  
1.427  
1.407  
1.394  
1.381  
1.369  
1.355  
1.350  
1.342  
1.335  
1.322  
1.309  
1.296  
1.226  
1.212  
0.926  
0.912  
0.898

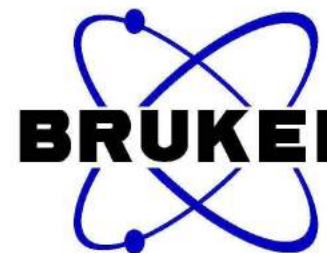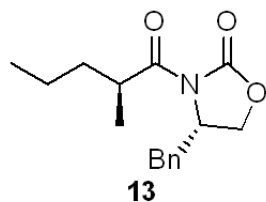

NAME 2019.08.02  
EXPNO 3  
PROCNO 1  
Date\_ 20190802  
Time 12.14  
INSTRUM spect  
PROBHD 5 mm PADUL 13C  
PULPROG zg30  
TD 65536  
SOLVENT CDCl3  
NS 16  
DS 0  
SWH 7500.000  
FIDRES 0.114441  
AQ 4.3691168  
RG 228  
DW 66.667  
DE 6.50  
TE 298.9  
D1 1.00000000  
TD0 1

===== CHANNEL f1 =====  
NUC1 1H  
P1 13.50  
PL1 2.00  
PL1W 16.79986763  
SFO1 500.1332508  
SI 32768  
SF 500.1300220  
WDW EM  
SSB 0  
LB 1.00  
GB 0  
PC 1.00

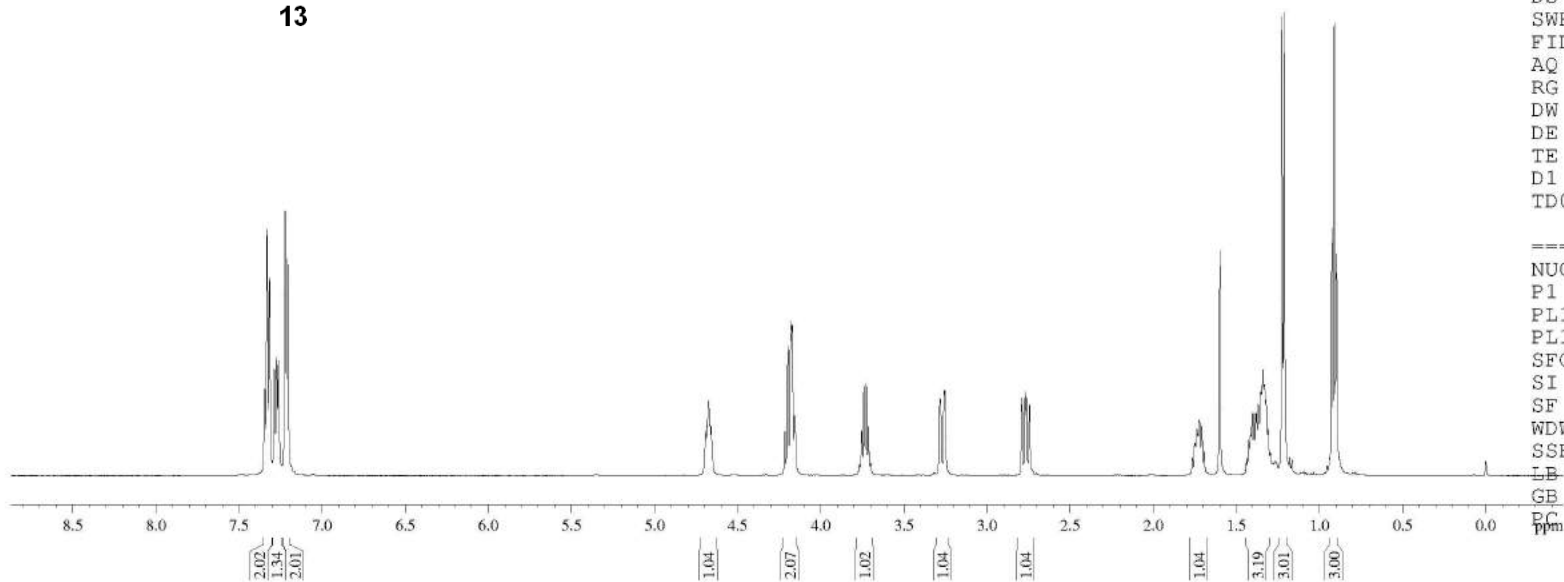

liushouxin-xh-Me

— 177.51

— 153.21

— 135.51

— 129.58

— 129.06

— 127.46

— 77.41

— 77.16

— 76.90

— 66.15

— 55.51

— 38.07

— 37.59

— 35.72

— 20.54

— 17.43

— 14.19

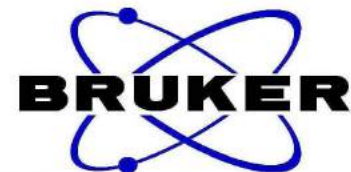

NAME 2019.08.02  
EXPNO 5  
PROCNO 1  
Date\_ 20190802  
Time 12.33  
INSTRUM spect  
PROBHD 5 mm PADUL 13C  
PULPROG zgpg30  
TD 32768  
SOLVENT CDC13  
NS 3072  
DS 4  
SWH 31250.000 Hz  
FIDRES 0.953674 Hz  
AQ 0.5243380 sec  
RG 2050  
DW 16.000 usec  
DE 6.50 usec  
TE 300.5 K  
D1 2.00000000 sec  
D11 0.03000000 sec  
TD0 1

===== CHANNEL f1 =====  
NUC1 13C  
P1 12.00 usec  
PL1 4.50 dB  
PL1W 33.60015869 W  
SFO1 125.7728799 MHz

===== CHANNEL f2 =====  
CPDPRG2 waltz16  
NUC2 1H  
PCPD2 80.00 usec  
PL2 2.00 dB  
PL12 17.46 dB  
PL13 17.46 dB  
PL2W 16.79986763 W  
PL12W 0.47786582 W  
PL13W 0.47786582 W  
SFO2 500.1320005 MHz  
SI 32768  
SF 125.7577741 MHz  
WDW EM  
SSB 0  
LB 1.00 Hz  
GB 0  
PC 1.40

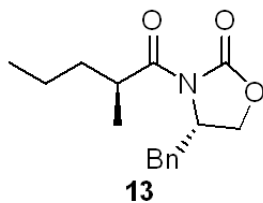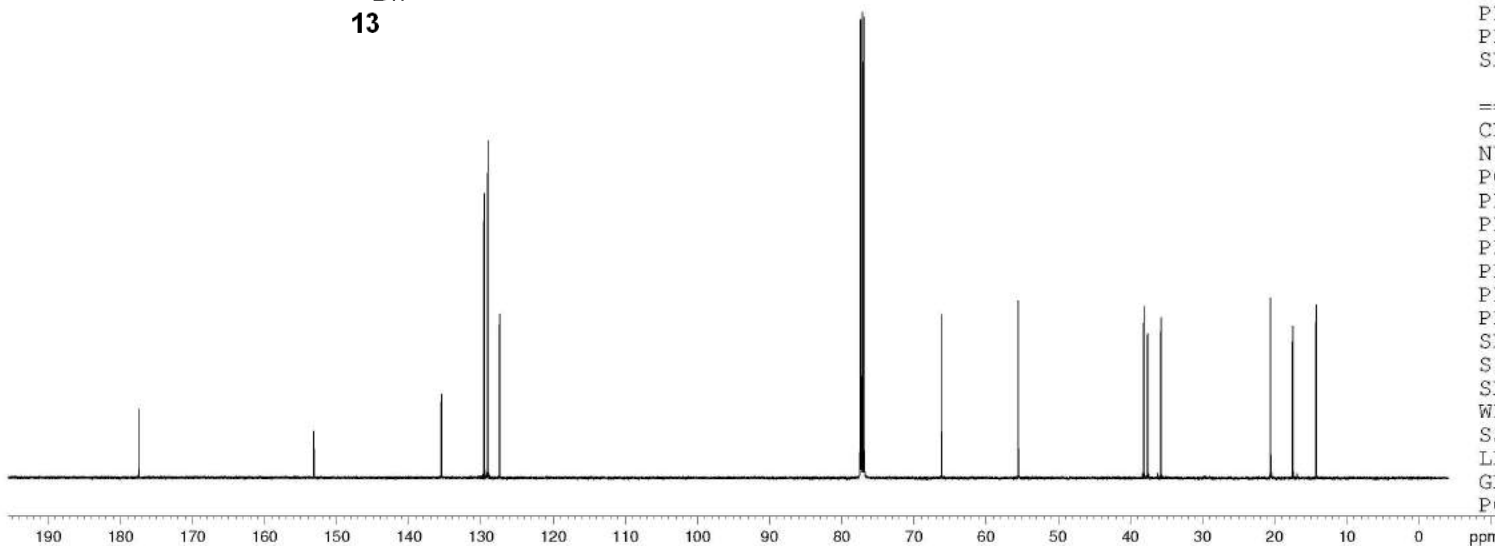

liushouxin-xh-OH

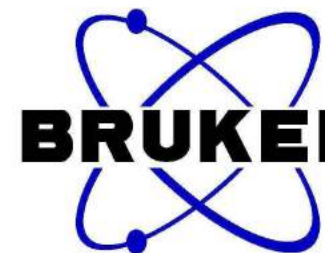

NAME 2019.08.03  
EXPNO 1  
PROCNO 1  
Date\_ 20190803  
Time 10.38  
INSTRUM spect  
PROBHD 5 mm PADUL 13C  
PULPROG zg30  
TD 65536  
SOLVENT CDCl3  
NS 8  
DS 0  
SWH 7500.000  
FIDRES 0.114441  
AQ 4.3691168  
RG 144  
DW 66.667  
DE 6.50  
TE 298.7  
D1 1.00000000  
TD0 1

===== CHANNEL f1 =====  
NUC1 1H  
P1 13.50  
PL1 2.00  
PL1W 16.79986763  
SFO1 500.1332508  
SI 32768  
SF 500.1300228  
WDW EM  
SSB 0  
LB 1.00  
GB 0  
PC 1.00

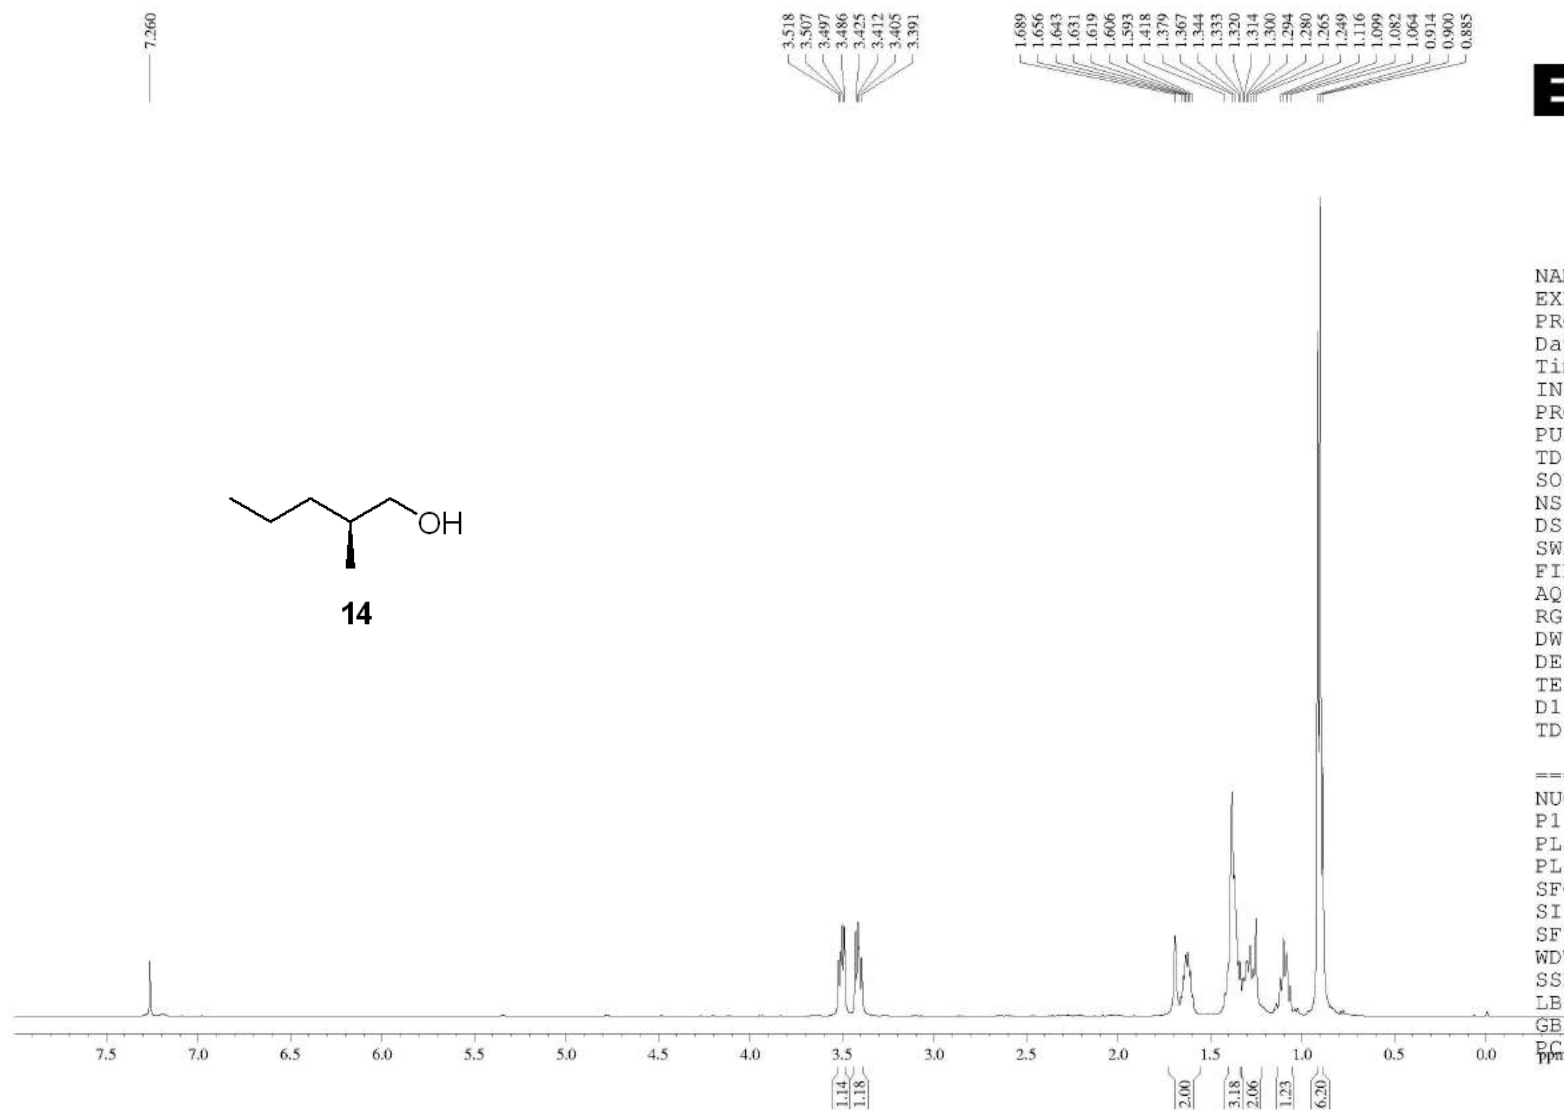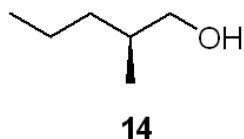

liushouxin-xh-OH

77.41  
77.16  
76.91  
68.50

35.61  
35.54

20.19  
16.65  
14.44

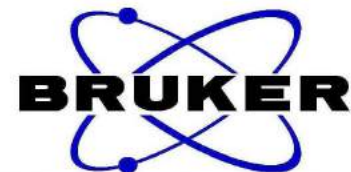

NAME 2019.08.10  
EXPNO 6  
PROCNO 1  
Date\_ 20190810  
Time 15.49  
INSTRUM spect  
PROBHD 5 mm PADUL 13C  
PULPROG zgpg30  
TD 32768  
SOLVENT CDC13  
NS 343  
DS 4  
SWH 31250.000 Hz  
FIDRES 0.953674 Hz  
AQ 0.5243380 sec  
RG 2050  
DW 16.000 usec  
DE 6.50 usec  
TE 298.5 K  
D1 2.00000000 sec  
D11 0.03000000 sec  
TD0 1

===== CHANNEL f1 =====  
NUC1 13C  
P1 12.00 usec  
PL1 4.50 dB  
PL1W 33.60015869 W  
SFO1 125.7728799 MHz

===== CHANNEL f2 =====  
CPDPRG2 waltz16  
NUC2 1H  
PCPD2 80.00 usec  
PL2 2.00 dB  
PL12 17.46 dB  
PL13 17.46 dB  
PL2W 16.79986763 W  
PL12W 0.47786582 W  
PL13W 0.47786582 W  
SFO2 500.1320005 MHz  
SI 32768  
SF 125.7577746 MHz  
WDW EM  
SSB 0  
LB 1.00 Hz  
GB 0  
PC 1.40

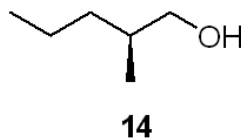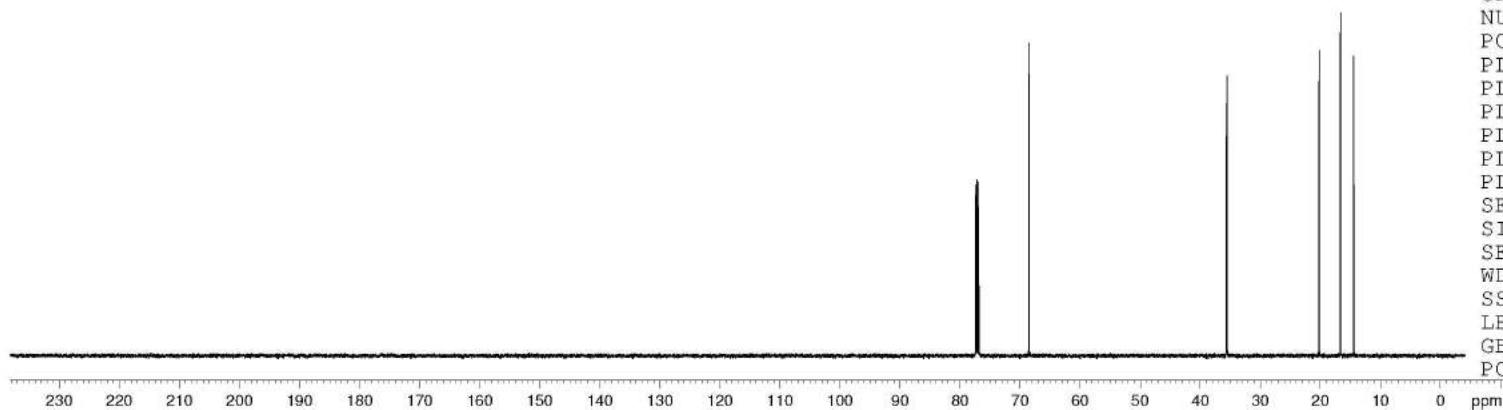

liushouxin-xh

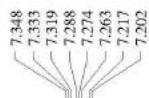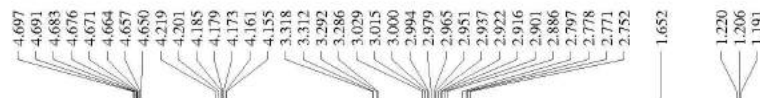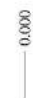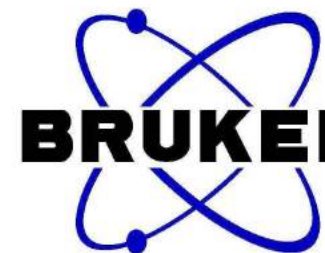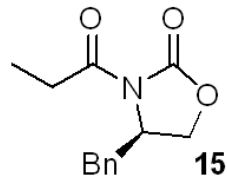

```

NAME          2019.07.27
EXPNO         2
PROCNO        1
Date_         20190727
Time          8.29
INSTRUM       spect
PROBHD        5 mm PADUL 13C
PULPROG       zg30
TD            65536
SOLVENT       CDCl3
NS            16
DS            0
SWH           7500.000
FIDRES        0.114441
AQ            4.3691168
RG            128
DW            66.667
DE            6.50
TE            298.2
D1            1.00000000
TD0           1
  
```

```

===== CHANNEL f1 =====
NUC1          1H
P1            13.50
PL1           2.00
PL1W         16.79986763
SFO1         500.1332508
SI            32768
SF           500.1300213
WDW           EM
SSB           0
LB            1.00
GB            0
PC            1.00
  
```

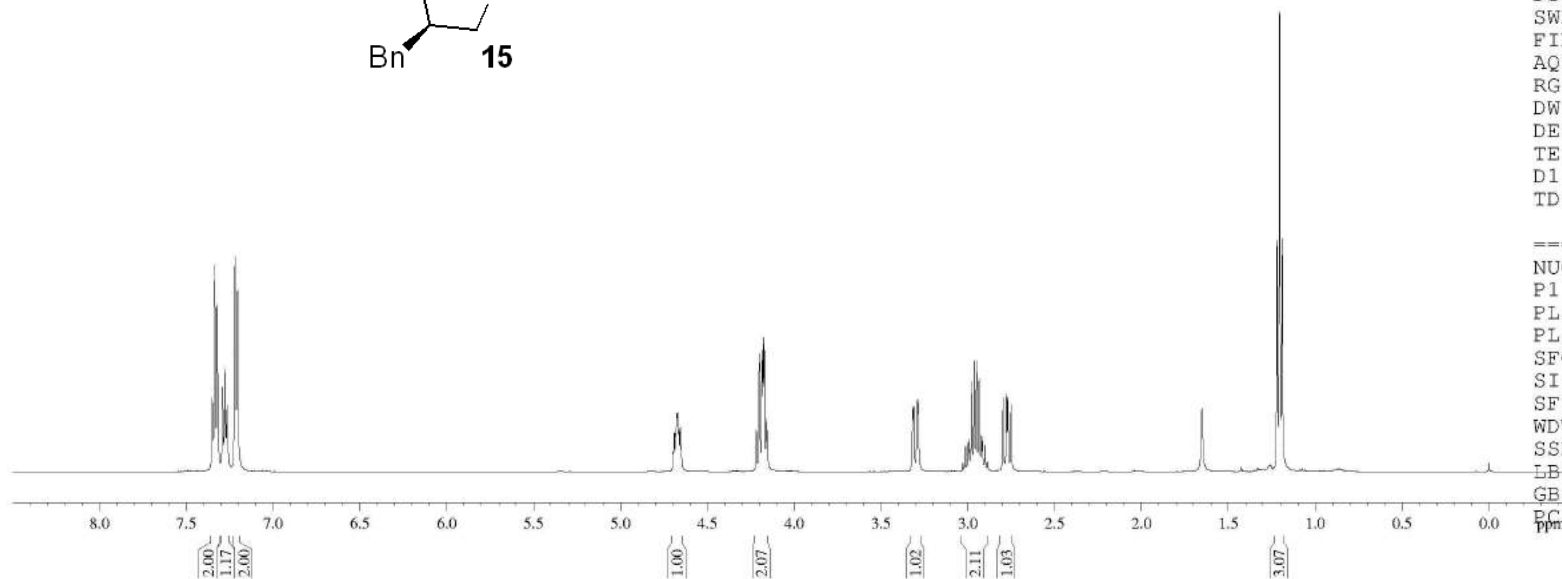



liushouxin-xh

— 174.21

— 153.63

— 135.46

— 129.53

— 129.07

— 127.45

— 77.41

— 77.16

— 76.90

— 66.34

— 55.28

— 38.05

— 29.30

— 8.42

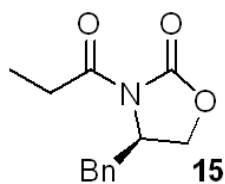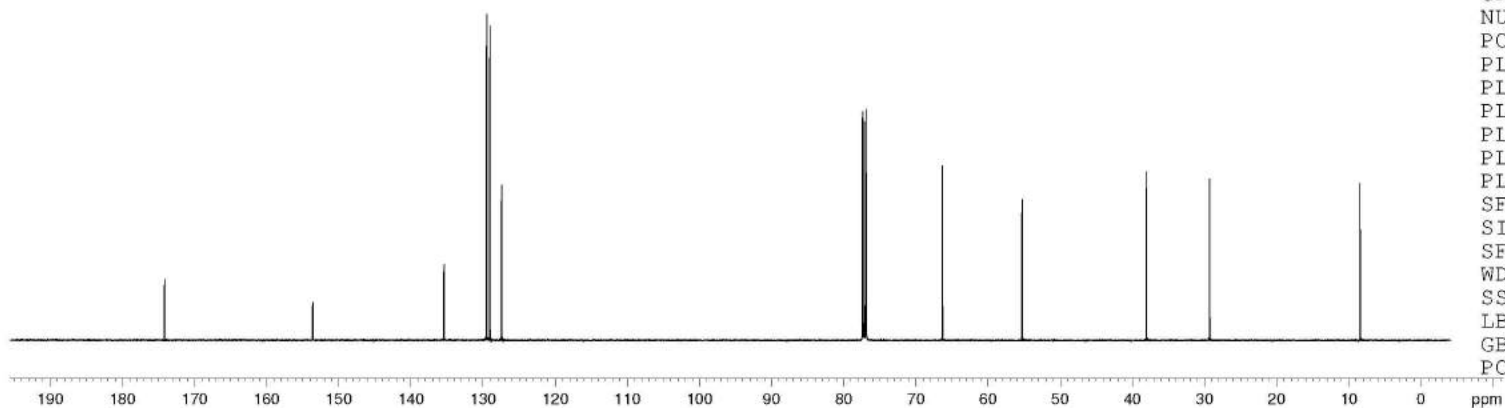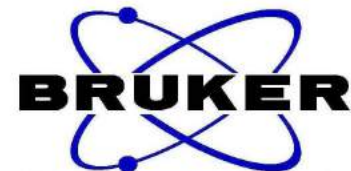

NAME 2019.07.27  
EXPNO 3  
PROCNO 2  
Date\_ 20190727  
Time 8.50  
INSTRUM spect  
PROBHD 5 mm PADUL 13C  
PULPROG zgpg30  
TD 32768  
SOLVENT CDC13  
NS 1851  
DS 4  
SWH 31250.000 Hz  
FIDRES 0.953674 Hz  
AQ 0.5243380 sec  
RG 2050  
DW 16.000 usec  
DE 6.50 usec  
TE 299.6 K  
D1 2.00000000 sec  
D11 0.03000000 sec  
TD0 1

===== CHANNEL f1 =====  
NUC1 13C  
P1 12.00 usec  
PL1 4.50 dB  
PL1W 33.60015869 W  
SFO1 125.7728799 MHz

===== CHANNEL f2 =====  
CPDPRG2 waltz16  
NUC2 1H  
PCPD2 80.00 usec  
PL2 2.00 dB  
PL12 17.46 dB  
PL13 17.46 dB  
PL2W 16.79986763 W  
PL12W 0.47786582 W  
PL13W 0.47786582 W  
SFO2 500.1320005 MHz  
SI 32768  
SF 125.7577772 MHz  
WDW EM  
SSB 0  
LB 1.00 Hz  
GB 0  
PC 1.40

xh-sr

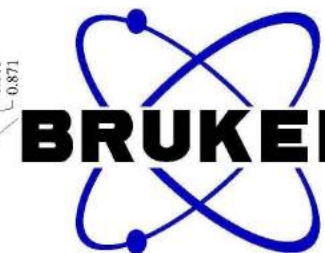

7.538  
7.524  
7.509  
7.281  
7.267  
7.260  
7.252  
7.223  
7.208  
4.706  
4.699  
4.691  
4.686  
4.679  
4.671  
4.665  
4.196  
4.178  
4.165  
4.154  
4.148  
4.136  
4.130  
3.964  
3.951  
3.935  
3.921  
3.310  
3.303  
3.283  
3.277  
2.753  
2.734  
2.727  
2.707  
1.899  
1.887  
1.883  
1.872  
1.860  
1.856  
1.844  
1.475  
1.462  
1.449  
1.400  
1.395  
1.390  
1.386  
1.382  
1.375  
1.367  
1.355  
1.350  
1.340  
1.335  
1.331  
1.325  
1.315  
1.308  
1.300  
1.294  
1.283  
1.274  
1.269  
1.260  
1.255  
1.255  
1.216  
1.204  
1.200  
1.188  
1.173  
1.160  
1.143  
1.125  
1.119  
1.115  
1.109  
1.103  
1.099  
0.920  
0.907  
0.899  
0.885  
0.871

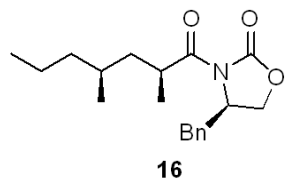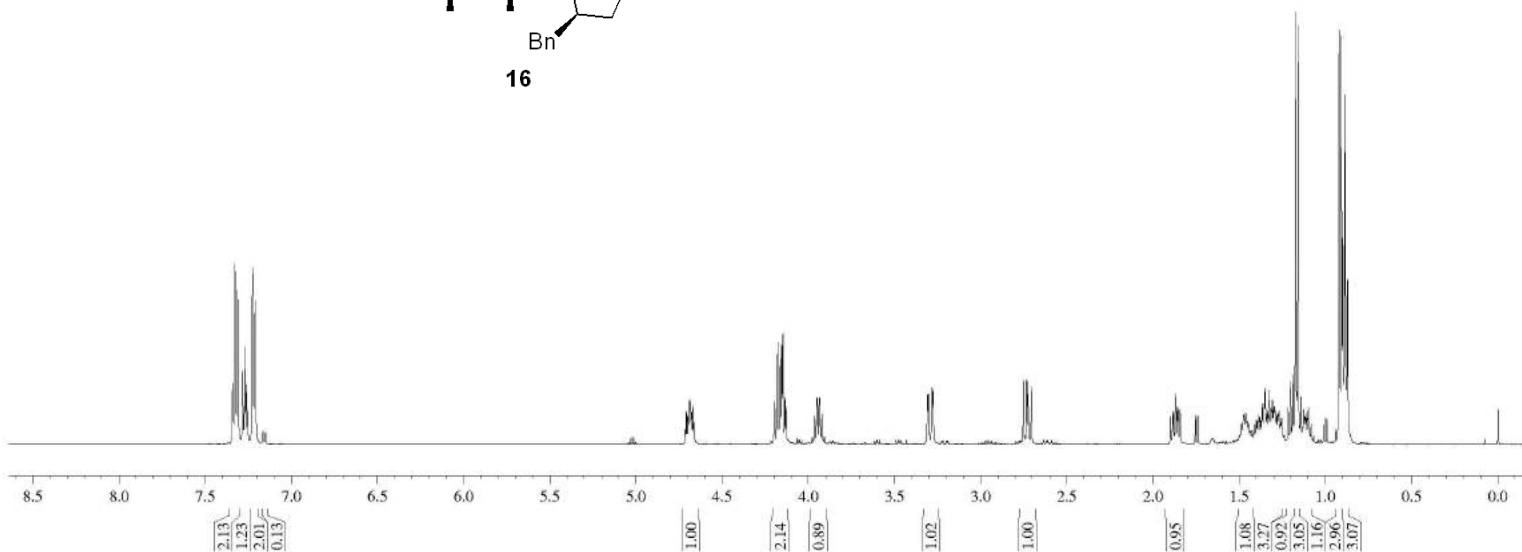

NAME 2020.12.23  
EXPNO 25  
PROCNO 1  
Date\_ 20201223  
Time 17.37  
INSTRUM spect  
PROBHD 5 mm PADUL 13C  
PULPROG zg30  
TD 65536  
SOLVENT CDCl3  
NS 16  
DS 0  
SWH 10000.000  
FIDRES 0.152588  
AQ 3.2768500  
RG 80.6  
DW 50.000  
DE 6.50  
TE 298.0  
D1 1.00000000  
TD0 1

==== CHANNEL f1 ===  
NUC1 1H  
P1 13.50  
PL1 2.00  
PL1W 16.79986763  
SFO1 500.1340010  
SI 32768  
SF 500.1300227  
WDW EM  
SSB 0  
LB 0.30  
GB 0  
PC 1.00

liushouxin-XH-celian-5

— 178.00 — 153.17 — 135.56 — 129.56 — 129.07 — 127.46

77.41 77.16 76.91 — 66.09 — 55.49

41.01 39.84 38.19 35.50 30.33

20.18 19.25 16.85 14.43

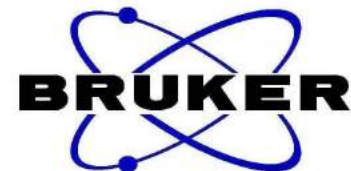

NAME 20190921  
 EXPNO 13  
 PROCNO 1  
 Date\_ 20190921  
 Time 15.09  
 INSTRUM spect  
 PROBHD 5 mm PADUL 13C  
 PULPROG zgpg30  
 TD 32768  
 SOLVENT CDC13  
 NS 2662  
 DS 4  
 SWH 29761.904 Hz  
 FIDRES 0.908261 Hz  
 AQ 0.5505524 sec  
 RG 1820  
 DW 16.800 usec  
 DE 6.50 usec  
 TE 299.4 K  
 D1 2.00000000 sec  
 D11 0.03000000 sec  
 TD0 1

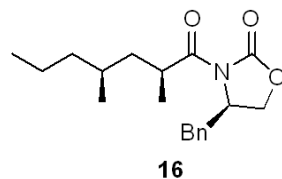

==== CHANNEL f1 =====  
 NUC1 13C  
 P1 12.00 usec  
 PL1 4.50 dB  
 PL1W 33.60015869 W  
 SFO1 125.7703643 MHz

==== CHANNEL f2 =====  
 CPDPRG2 waltz16  
 NUC2 1H  
 PCPD2 80.00 usec  
 PL2 2.00 dB  
 PL12 17.46 dB  
 PL13 17.46 dB  
 PL2W 16.79986763 W  
 PL12W 0.47786582 W  
 PL13W 0.47786582 W  
 SFO2 500.1320005 MHz  
 SI 32768  
 SF 125.7577739 MHz  
 WDW EM  
 SSB 0  
 LB 1.00 Hz  
 GB 0  
 PC 1.40

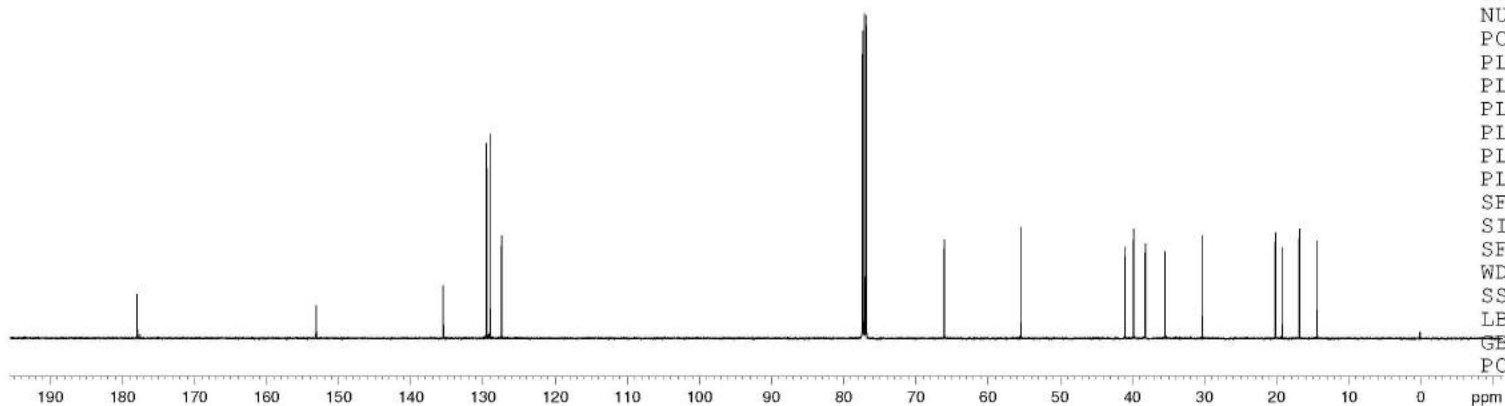

xh-sr-cooh

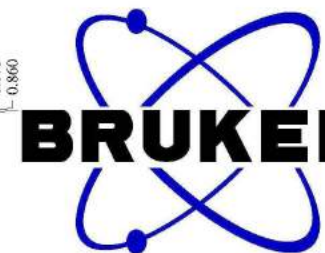

8.082 7.463 7.529 7.260 4.612 2.604 2.591 2.587 2.577 2.573 2.565 2.561 2.547 2.533 2.533 1.746 1.739 1.729 1.719 1.712 1.701 1.554 1.541 1.529 1.517 1.505 1.492 1.479 1.466 1.452 1.452 1.404 1.393 1.389 1.378 1.372 1.368 1.363 1.357 1.353 1.349 1.343 1.338 1.329 1.320 1.315 1.310 1.306 1.300 1.295 1.291 1.286 1.280 1.275 1.265 1.258 1.253 1.248 1.244 1.238 1.234 1.228 1.221 1.217 1.188 1.174 1.166 1.160 1.151 1.151 1.139 1.133 1.121 1.111 1.105 1.101 1.095 1.090 1.085 1.079 1.068 1.059 0.898 0.889 0.885 0.875 0.860

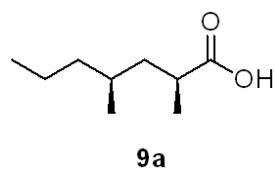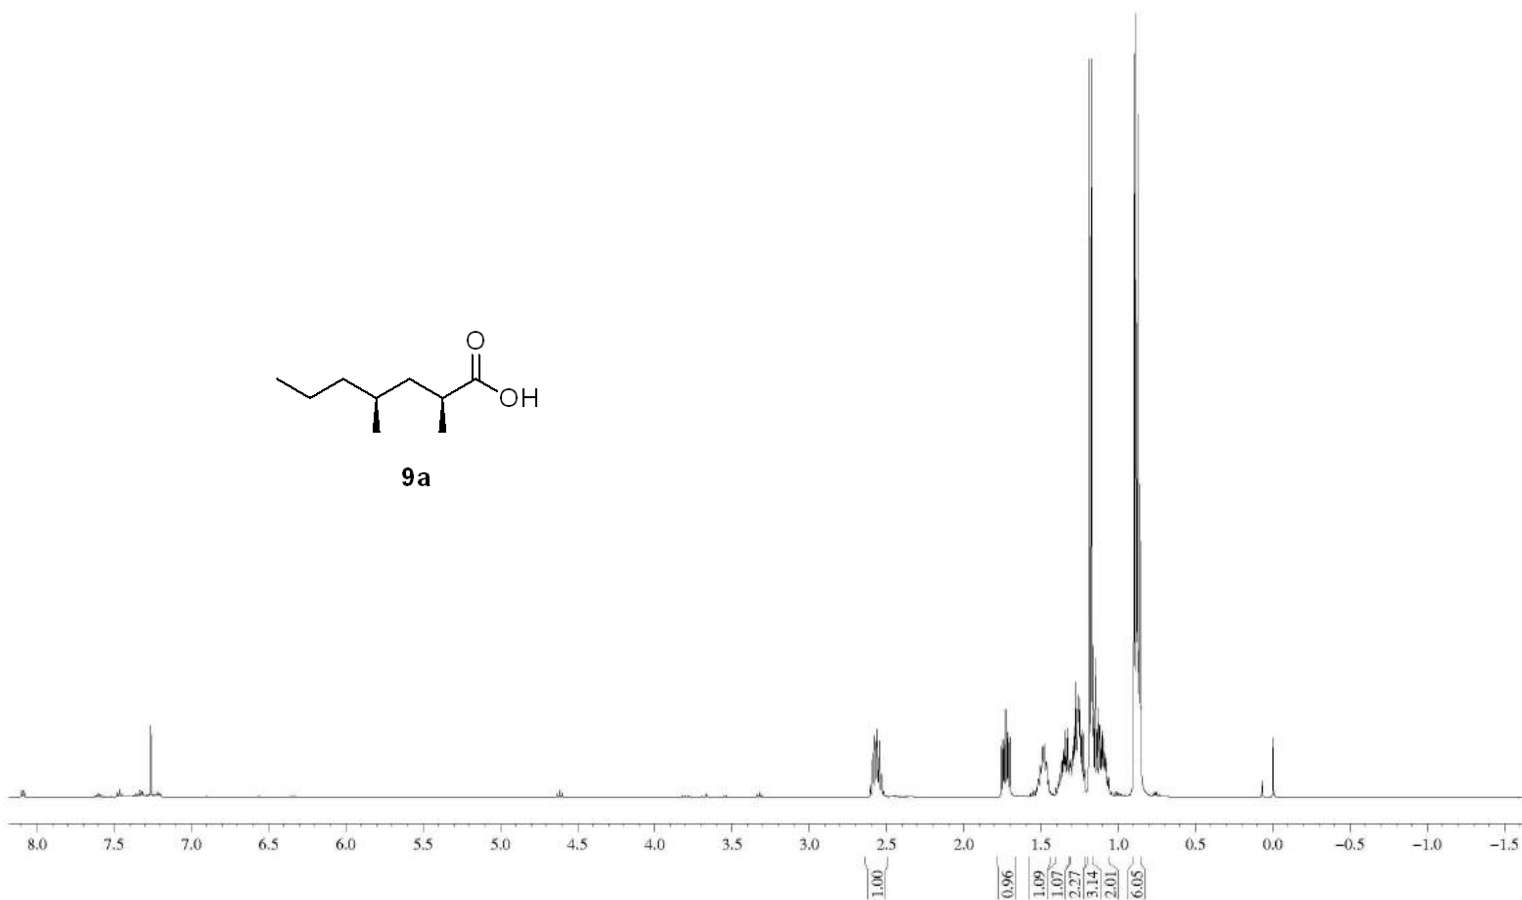

NAME 2020.12.23  
EXPNO 22  
PROCNO 1  
Date\_ 20201223  
Time 17.20  
INSTRUM spect  
PROBHD 5 mm PADUL 13C  
PULPROG zg30  
TD 65536  
SOLVENT CDCl3  
NS 16  
DS 0  
SWH 10000.000  
FIDRES 0.152588  
AQ 3.2768500  
RG 80.6  
DW 50.000  
DE 6.50  
TE 298.0  
D1 1.00000000  
TD0 1

==== CHANNEL f1 ===  
NUC1 1H  
P1 13.50  
PL1 2.00  
PL1W 16.79986763  
SFO1 500.1340010  
SI 32768  
SF 500.1300227  
WDW EM  
SSB 0  
LB 0.30  
GB 0  
PC 1.00

liushouxin-xh--SR-COOH

183.80

77.41  
77.16  
76.91

41.37  
39.42  
37.46  
30.58

19.99  
19.68  
17.94  
14.42

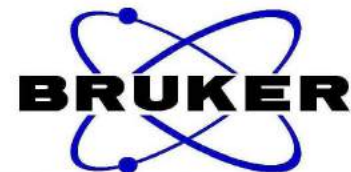

NAME 2021.03.26  
EXPNO 10  
PROCNO 1  
Date\_ 20210326  
Time 12.33  
INSTRUM spect  
PROBHD 5 mm PADUL 13C  
PULPROG zgpg30  
TD 32768  
SOLVENT CDC13  
NS 5120  
DS 0  
SWH 29761.904 Hz  
FIDRES 0.908261 Hz  
AQ 0.5505524 sec  
RG 2050  
DW 16.800 usec  
DE 6.50 usec  
TE 298.6 K  
D1 2.00000000 sec  
D11 0.03000000 sec  
TD0 1

==== CHANNEL f1 =====  
NUC1 13C  
P1 12.00 usec  
PL1 4.50 dB  
PL1W 33.60015869 W  
SFO1 125.7703643 MHz

==== CHANNEL f2 =====  
CPDPRG2 waltz16  
NUC2 1H  
PCPD2 80.00 usec  
PL2 2.00 dB  
PL12 17.46 dB  
PL13 17.46 dB  
PL2W 16.79986763 W  
PL12W 0.47786582 W  
PL13W 0.47786582 W  
SFO2 500.1320005 MHz  
SI 32768  
SF 125.7577722 MHz  
WDW EM  
SSB 0  
LB 1.00 Hz  
GB 0  
PC 1.40

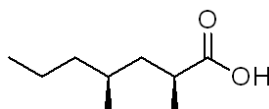

9a

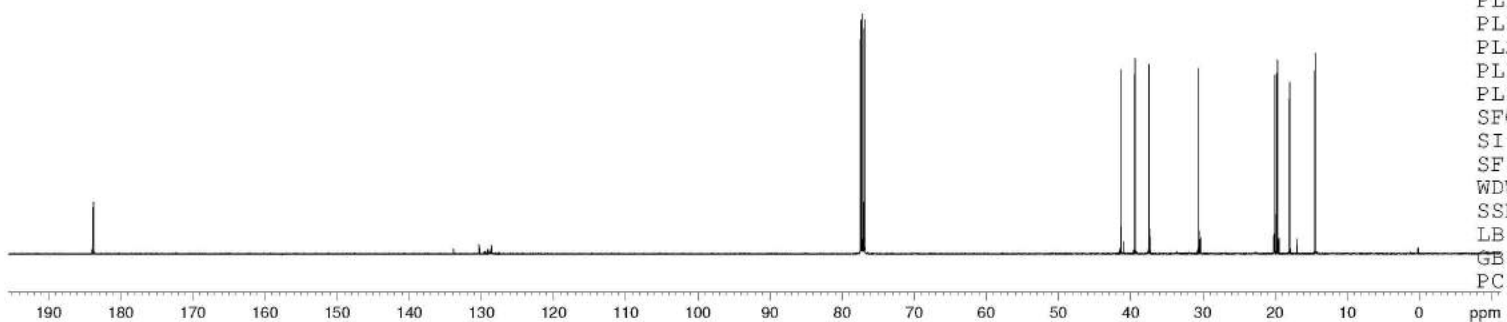

xh-rs-cooh

7.260

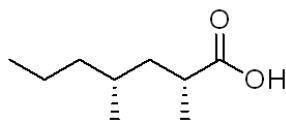

9b

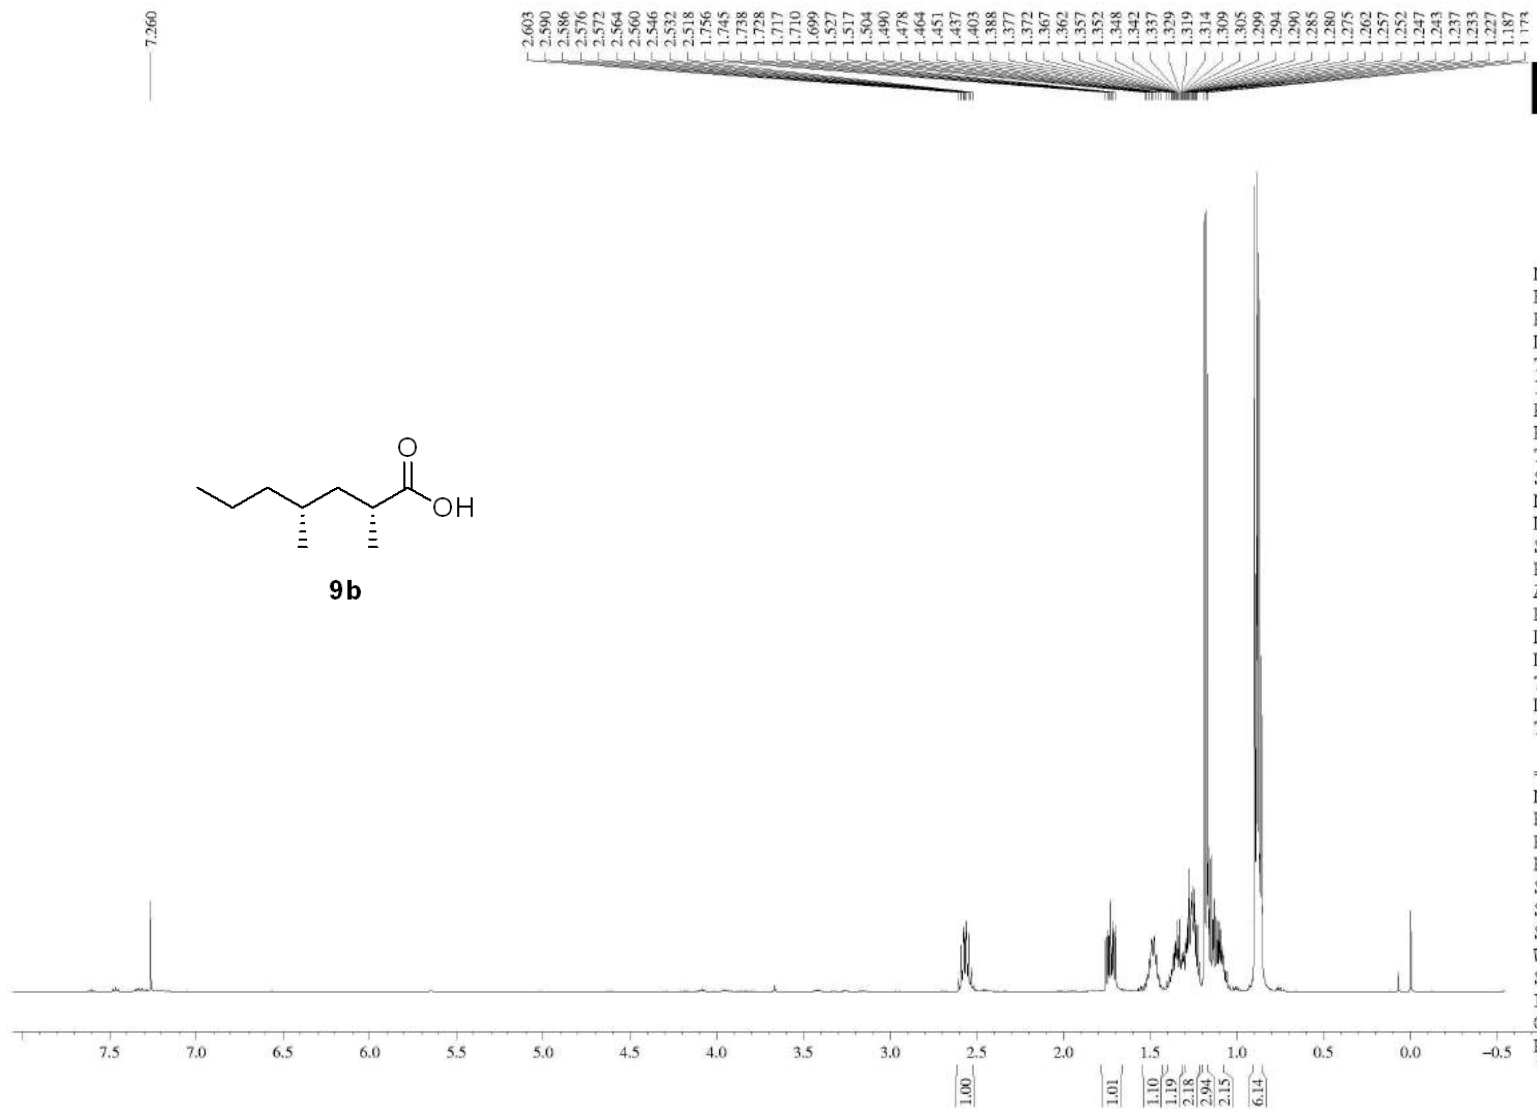

2.603  
2.590  
2.586  
2.576  
2.572  
2.564  
2.560  
2.546  
2.532  
2.518  
1.756  
1.745  
1.738  
1.728  
1.717  
1.710  
1.699  
1.627  
1.517  
1.504  
1.490  
1.478  
1.464  
1.451  
1.437  
1.403  
1.388  
1.377  
1.372  
1.367  
1.362  
1.357  
1.352  
1.348  
1.342  
1.337  
1.329  
1.319  
1.314  
1.309  
1.305  
1.299  
1.294  
1.290  
1.285  
1.280  
1.275  
1.262  
1.257  
1.252  
1.247  
1.243  
1.237  
1.233  
1.227  
1.187  
1.173

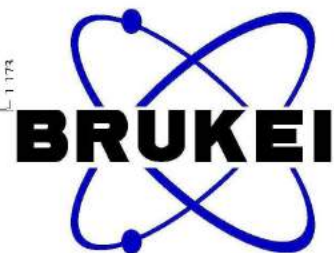

NAME 2020.12.18  
EXPNO 11  
PROCNO 1  
Date\_ 20201218  
Time 19.23  
INSTRUM spect  
PROBHD 5 mm PADUL 13C  
PULPROG zg30  
TD 65536  
SOLVENT CDCl3  
NS 15  
DS 0  
SWH 5000.000  
FIDRES 0.076294  
AQ 6.5536499  
RG 90.5  
DW 100.000  
DE 6.50  
TE 298.0  
D1 1.00000000  
TD0 1

===== CHANNEL f1 =====  
NUC1 1H  
P1 13.50  
PL1 2.00  
PL1W 16.79986763  
SFO1 500.1322506  
SI 32768  
SF 500.1300228  
WDW EM  
SSB 0  
LB 0.30  
GB 0  
PC 1.00

liushouxin-xh-RS-COOH

184.00

77.41  
77.16  
76.91

41.36  
39.41  
37.47  
30.57  
19.98  
19.67  
17.93  
14.42

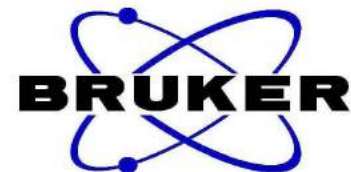

NAME 2021.03.11  
EXPNO 14  
PROCNO 1  
Date\_ 20210319  
Time 16.54  
INSTRUM spect  
PROBHD 5 mm PADUL 13C  
PULPROG zgpg30  
TD 32768  
SOLVENT CDC13  
NS 125  
DS 0  
SWH 29761.904 Hz  
FIDRES 0.908261 Hz  
AQ 0.5505524 sec  
RG 1150  
DW 16.800 usec  
DE 6.50 usec  
TE 295.4 K  
D1 2.00000000 sec  
D11 0.03000000 sec  
TD0 1

===== CHANNEL f1 =====  
NUC1 13C  
P1 12.00 usec  
PL1 4.50 dB  
PL1W 33.60015869 W  
SFO1 125.7703643 MHz

===== CHANNEL f2 =====  
CPDPRG2 waltz16  
NUC2 1H  
PCPD2 80.00 usec  
PL2 2.00 dB  
PL12 17.46 dB  
PL13 17.46 dB  
PL2W 16.79986763 W  
PL12W 0.47786582 W  
PL13W 0.47786582 W  
SFO2 500.1320005 MHz  
SI 32768  
SF 125.7577730 MHz  
WDW EM  
SSB 0  
LB 1.00 Hz  
GB 0  
PC 1.40

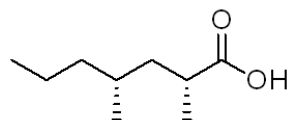

9b

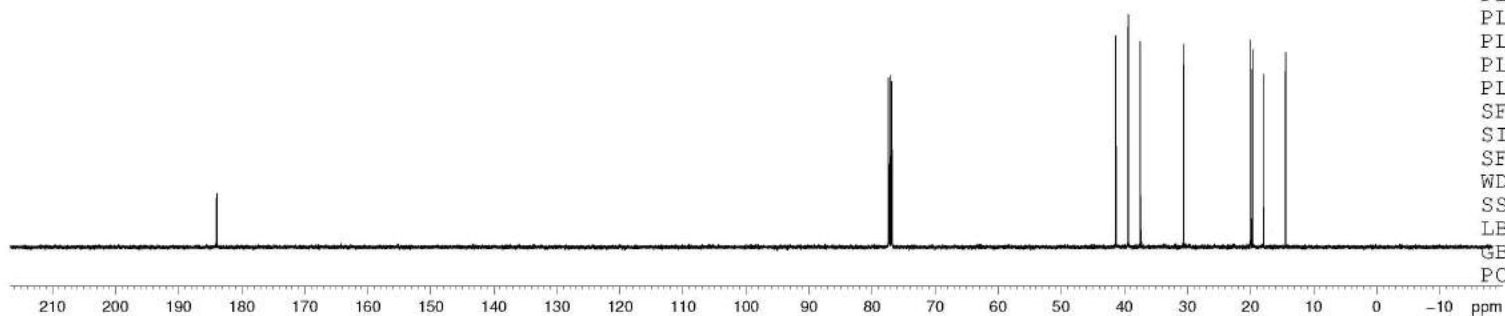



xh-cooh

7.260

2.575  
2.561  
2.546  
2.532  
2.519  
2.505  
1.567  
1.554  
1.551  
1.542  
1.538  
1.526  
1.513  
1.504  
1.491  
1.479  
1.463  
1.401  
1.391  
1.385  
1.375  
1.366  
1.360  
1.351  
1.344  
1.344  
1.337  
1.333  
1.331  
1.319  
1.309  
1.298  
1.294  
1.285  
1.280  
1.274  
1.271  
1.266  
1.260  
1.246  
1.241  
1.164  
1.150  
1.132  
1.126  
1.121  
1.117

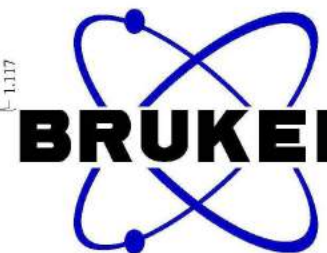

NAME 2020.12.01  
EXPNO 15  
PROCNO 1  
Date\_ 20201201  
Time 20.00  
INSTRUM spect  
PROBHD 5 mm PADUL 13C  
PULPROG zg30  
TD 65536  
SOLVENT CDCl3  
NS 16  
DS 0  
SWH 10000.000  
FIDRES 0.152588  
AQ 3.2768500  
RG 114  
DW 50.000  
DE 6.50  
TE 298.0  
D1 1.00000000  
TD0 1

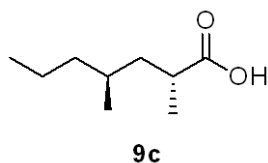

==== CHANNEL f1 ===  
NUC1 1H  
P1 13.50  
PL1 2.00  
PL1W 16.79986763  
SFO1 500.1340010  
SI 32768  
SF 500.1300230  
WDW EM  
SSB 0  
LB 0.30  
GB 0  
PC 1.00

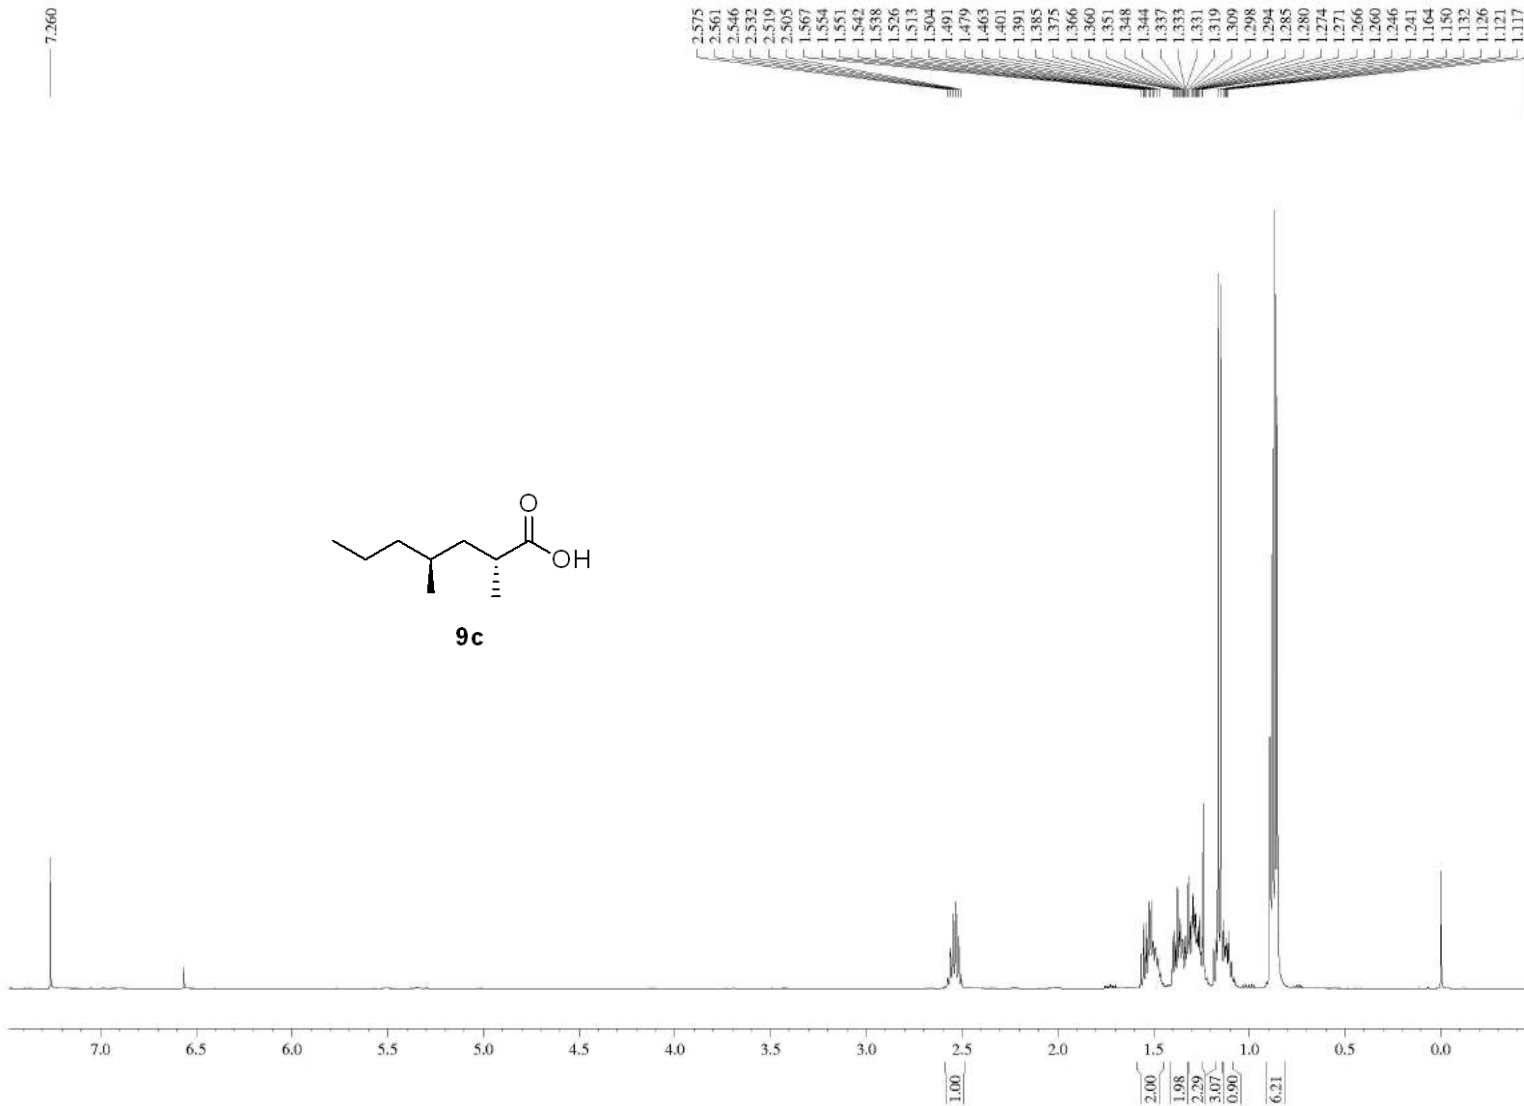



liushouxin XH-COOH-SS

183.86

77.42  
77.16  
76.91

40.95  
39.44  
37.30  
30.33  
20.08  
19.44  
16.97  
14.42

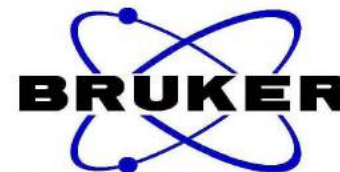

NAME 2021.05.07  
EXPNO 15  
PROCNO 1  
Date\_ 20210510  
Time 22.13  
INSTRUM spect  
PROBHD 5 mm PADUL 13C  
PULPROG zgpg30  
TD 32768  
SOLVENT CDC13  
NS 805  
DS 0  
SWH 29761.904 Hz  
FIDRES 0.908261 Hz  
AQ 0.5505524 sec  
RG 1440  
DW 16.800 usec  
DE 6.50 usec  
TE 299.8 K  
D1 2.00000000 sec  
D11 0.03000000 sec  
TD0 1

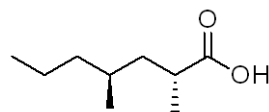

9c

===== CHANNEL f1 =====  
NUC1 13C  
P1 12.00 usec  
PL1 4.50 dB  
PL1W 33.60015869 W  
SFO1 125.7703643 MHz

===== CHANNEL f2 =====  
CPDPRG2 waltz16  
NUC2 1H  
PCPD2 80.00 usec  
PL2 2.00 dB  
PL12 17.46 dB  
PL13 17.46 dB  
PL2W 16.79986763 W  
PL12W 0.47786582 W  
PL13W 0.47786582 W  
SFO2 500.1320005 MHz  
SI 32768  
SF 125.7577713 MHz  
WDW EM  
SSB 0  
LB 1.00 Hz  
GB 0  
PC 1.40

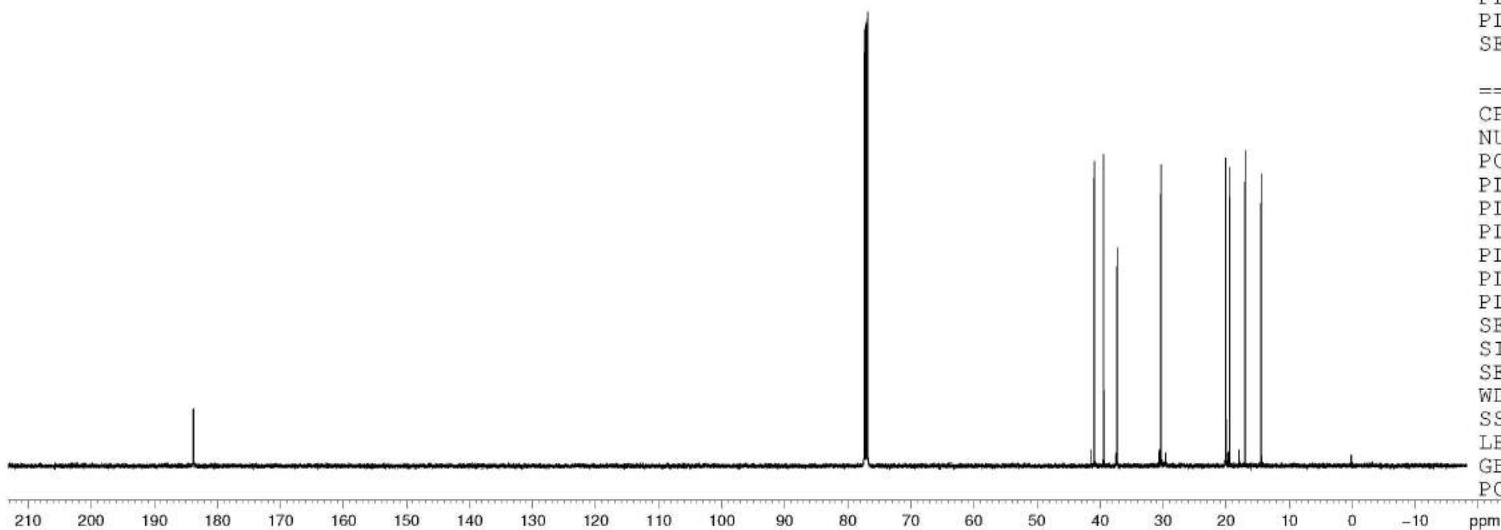

liushouxin-f-2013-4-10b

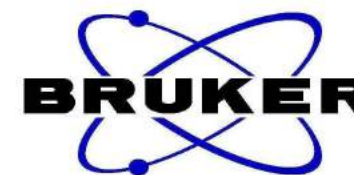

NAME 2013.04.13  
EXPNO 5  
PROCNO 1  
Date\_ 20130413  
Time 16.21  
INSTRUM spect  
PROBHD 5 mm PABBO BB-  
PULPROG zg30  
TD 32768  
SOLVENT CDCl3  
NS 4  
DS 0  
SWH 7500.000  
FIDRES 0.228882  
AQ 2.1845834  
RG 90.5  
DW 66.667  
DE 6.50  
TE 293.4  
D1 1.00000000  
TD0 1

==== CHANNEL f1 ====  
NUC1 1H  
P1 13.00  
PL1 2.00  
PL1W 16.79986763  
SFO1 500.1330885  
SI 32768  
SF 500.1300116  
WDW EM  
SSB 0  
LB 0.30  
GB 0  
PC 1.00

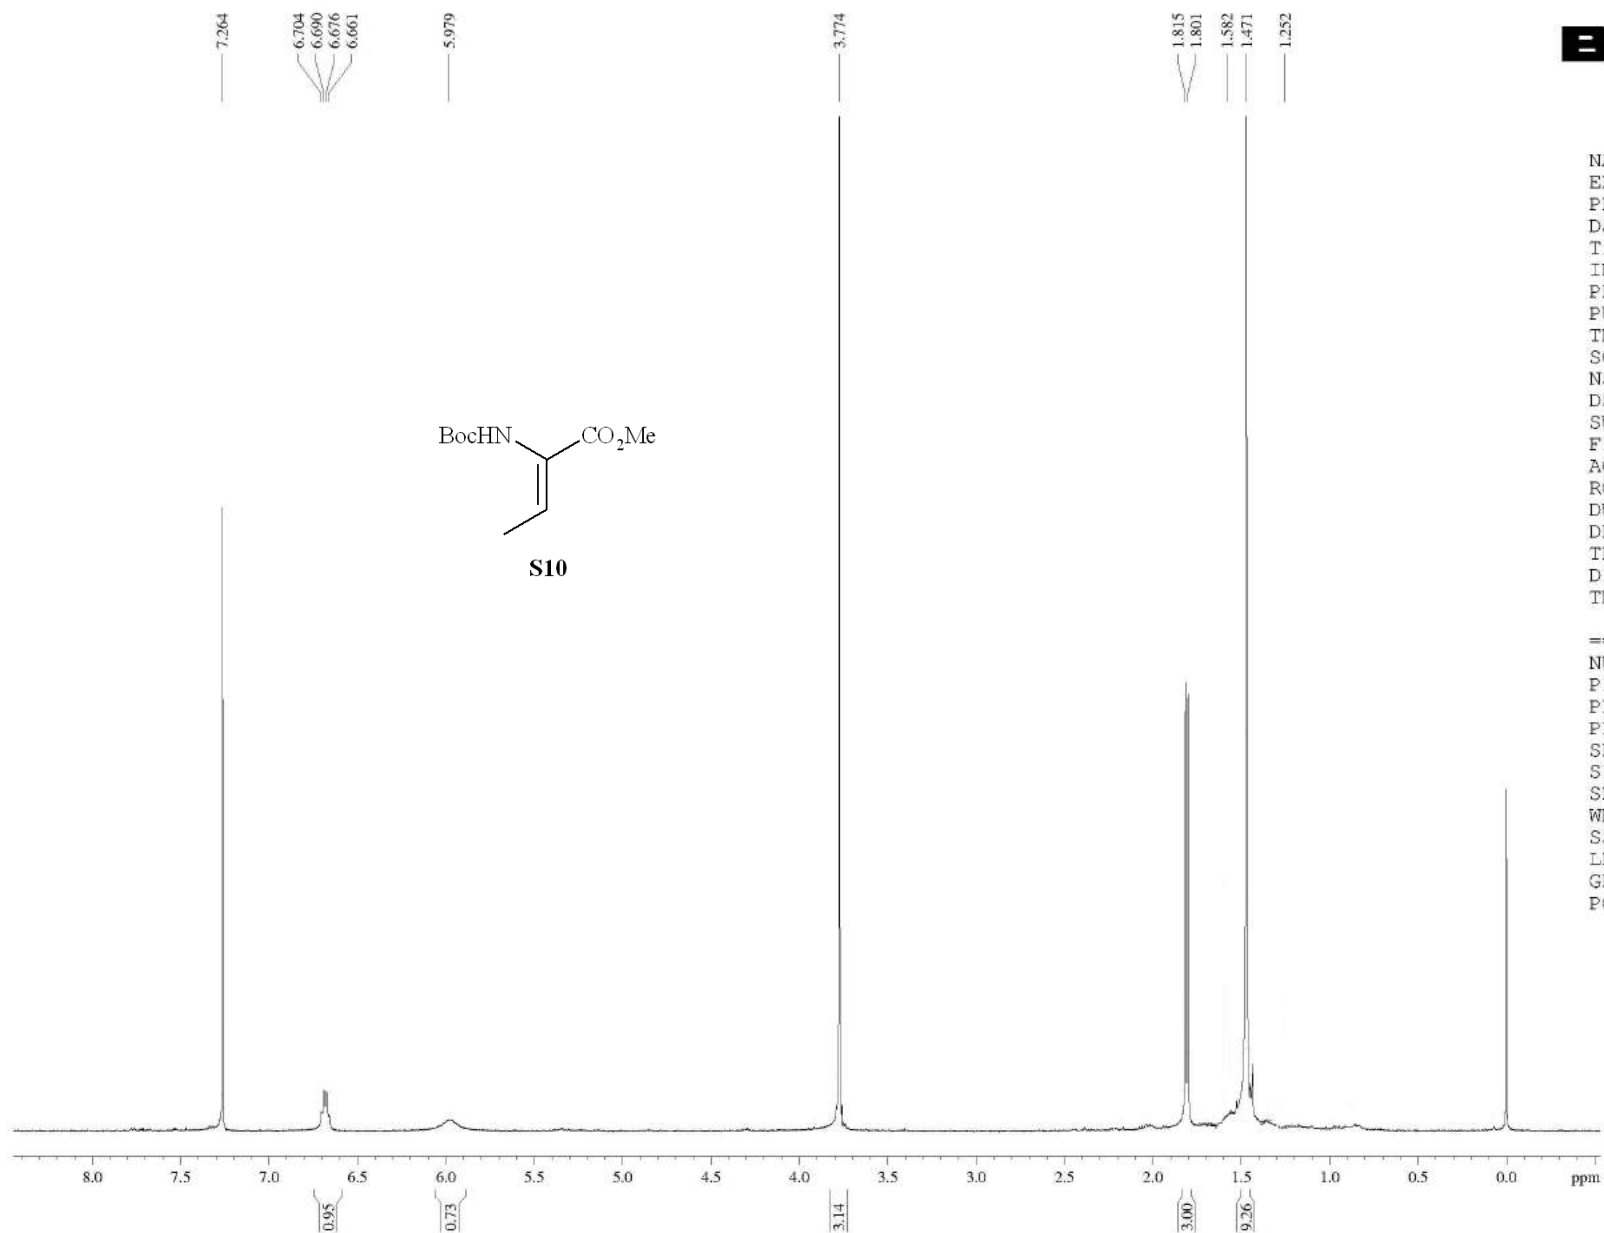

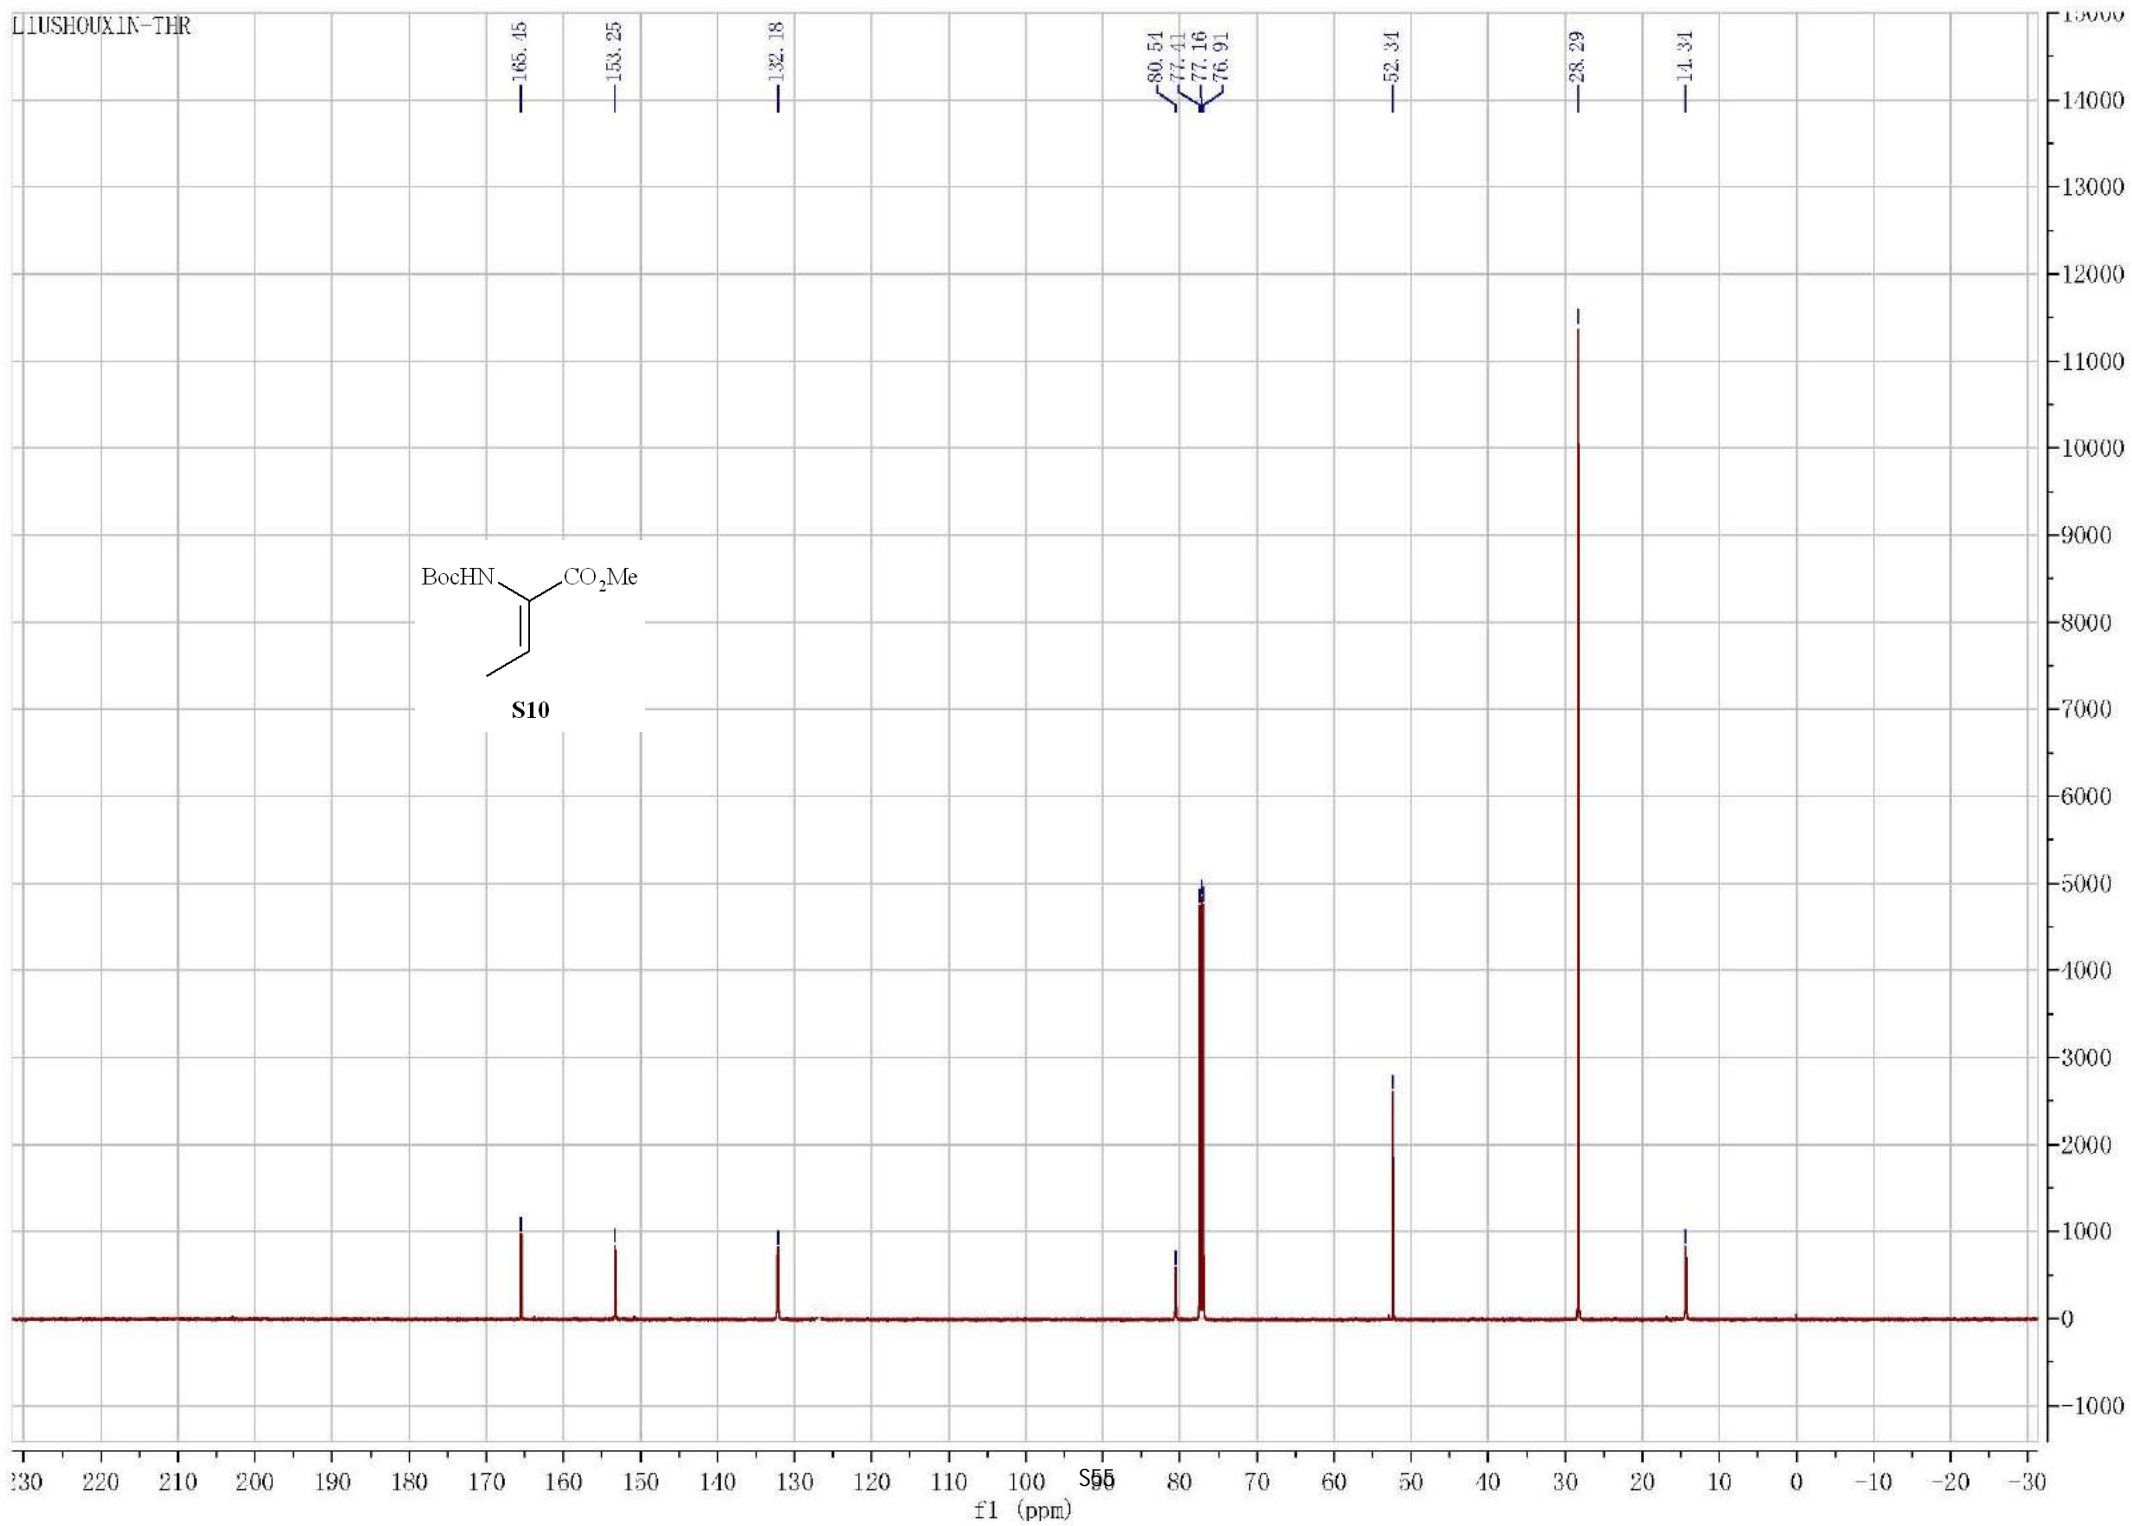

liushouxin-2018-3-14-ZY

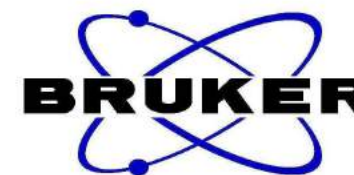

NAME 2018.03.15  
EXPNO 10  
PROCNO 1  
Date\_ 20180315  
Time 15.05  
INSTRUM spect  
PROBHD 5 mm PADUL 13C  
PULPROG zg30  
TD 65536  
SOLVENT MeOD  
NS 16  
DS 0  
SWH 10330.578  
FIDRES 0.157632  
AQ 3.1719923  
RG 18  
DW 48.400  
DE 6.50  
TE 298.0  
D1 1.00000000  
TD0 1

===== CHANNEL f1 =====  
NUC1 1H  
P1 13.50  
PL1 2.00  
PL1W 16.79986763  
SFO1 500.1330885  
SI 32768  
SF 500.1300153  
WDW EM  
SSB 0  
LB 0.30  
GB 0  
PC 1.00

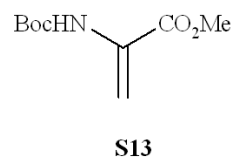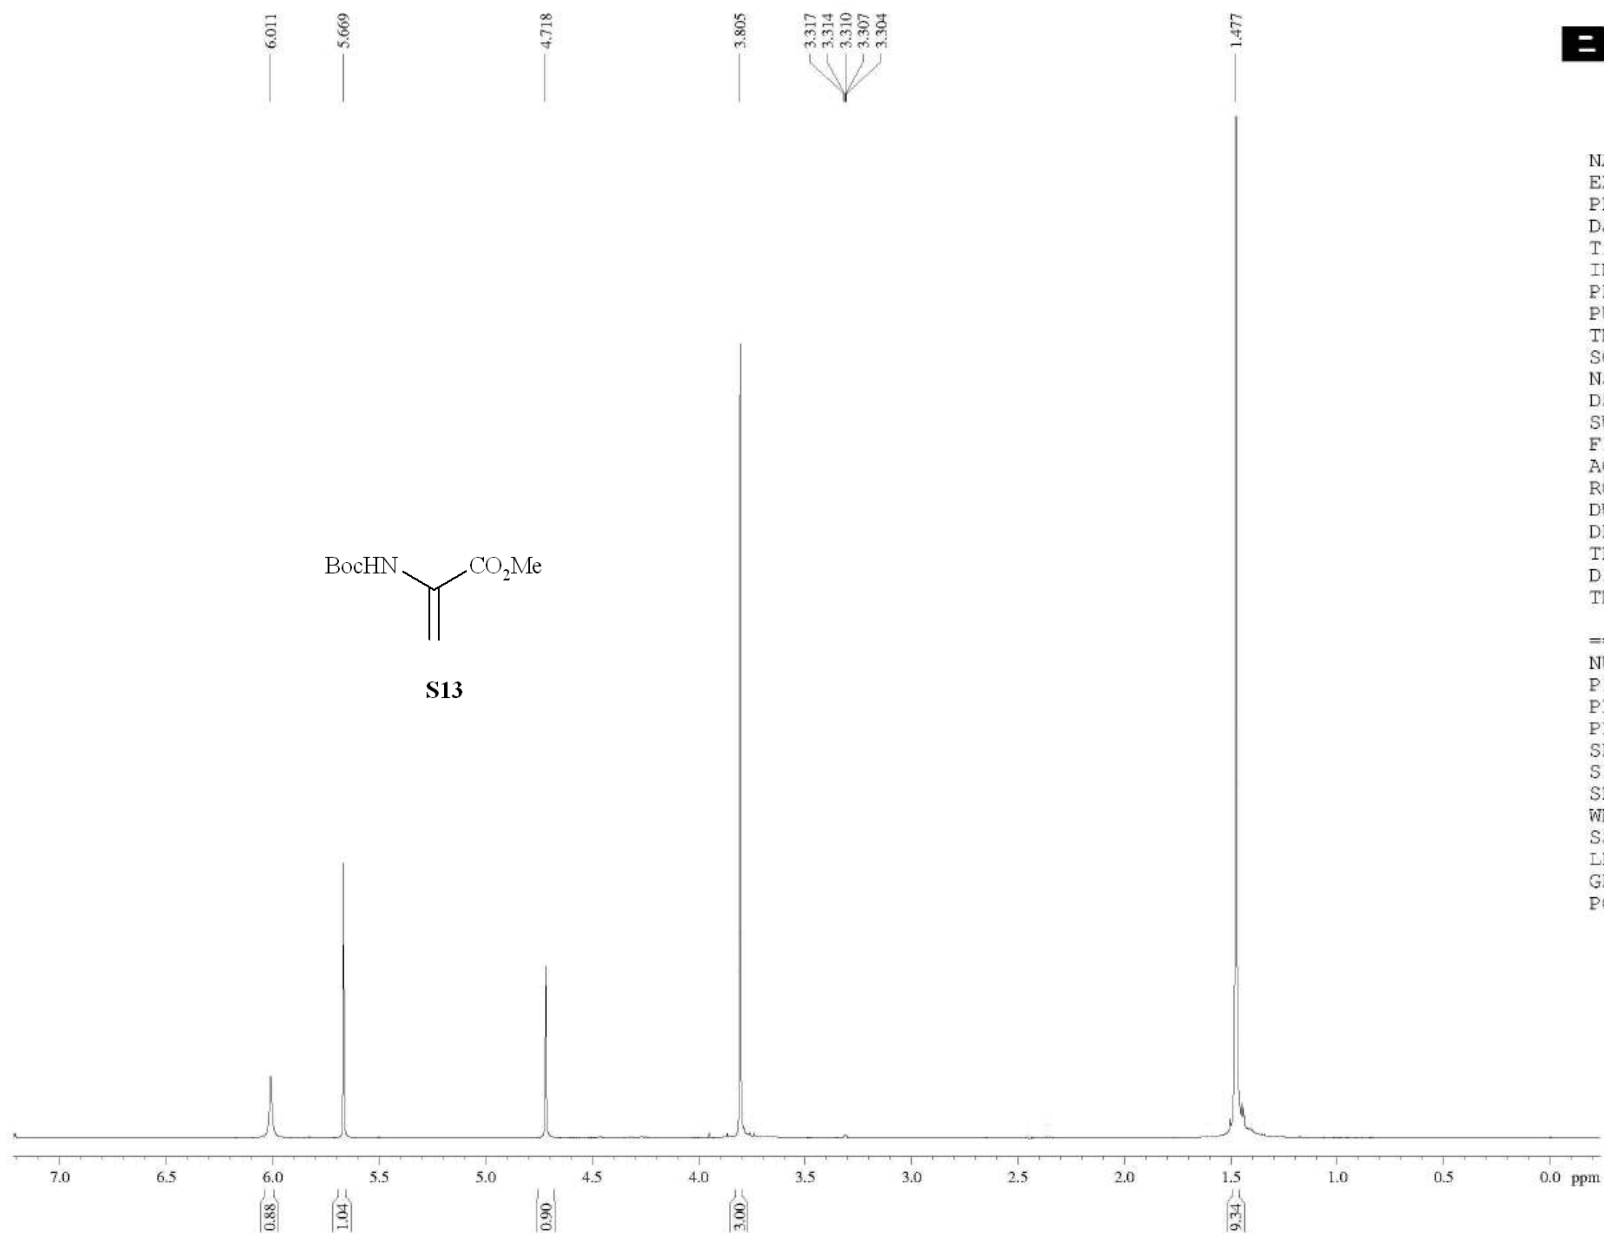

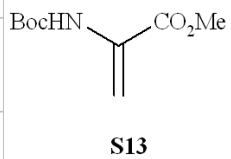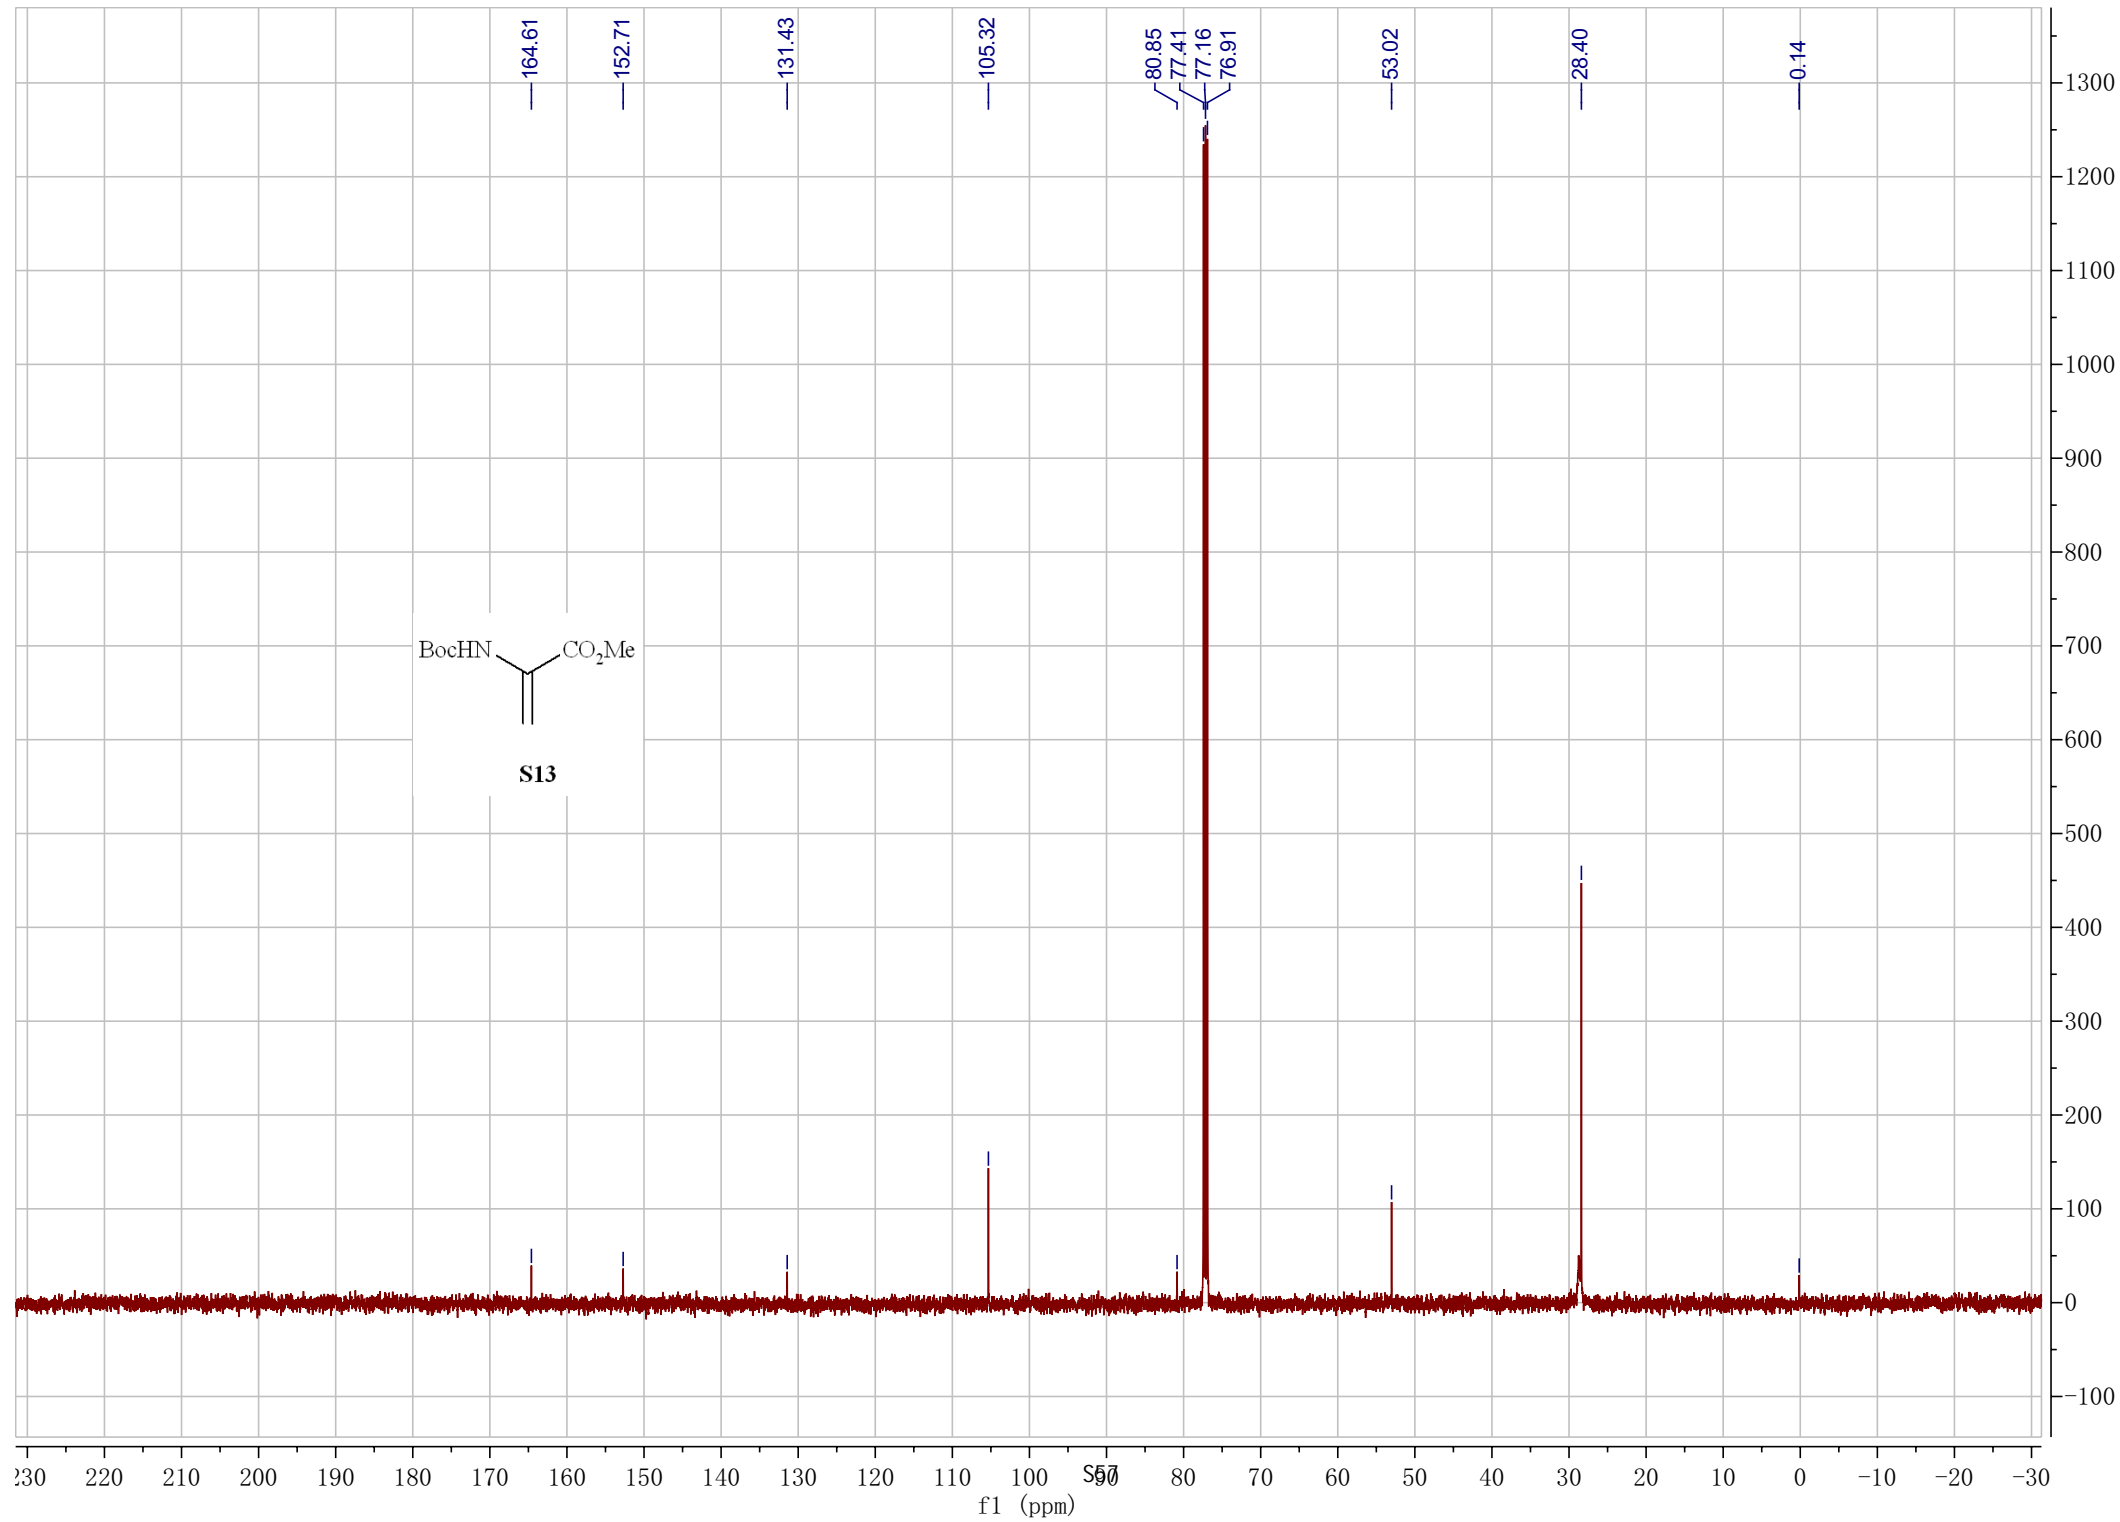

liu shou xin THR-Pro-H2o

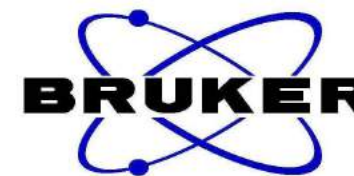

NAME 2012.08.08  
EXPNO 4  
PROCNO 1  
Date\_ 20120808  
Time 15.02  
INSTRUM spect  
PROBHD 5 mm PABBO BB-  
PULPROG zg30  
TD 65536  
SOLVENT CDCl3  
NS 1  
DS 2  
SWH 10330.578  
FIDRES 0.157632  
AQ 3.1719923  
RG 64  
DW 48.400  
DE 6.50  
TE 299.9  
D1 1.00000000  
TD0 1

==== CHANNEL f1 ====  
NUC1 1H  
P1 13.00  
PL1 2.00  
PL1W 16.79986763  
SFO1 500.1330885  
SI 32768  
SF 500.1299975  
WDW EM  
SSB 0  
LB 1.00  
GB 0  
PC 1.00

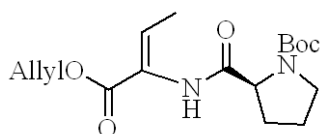

23

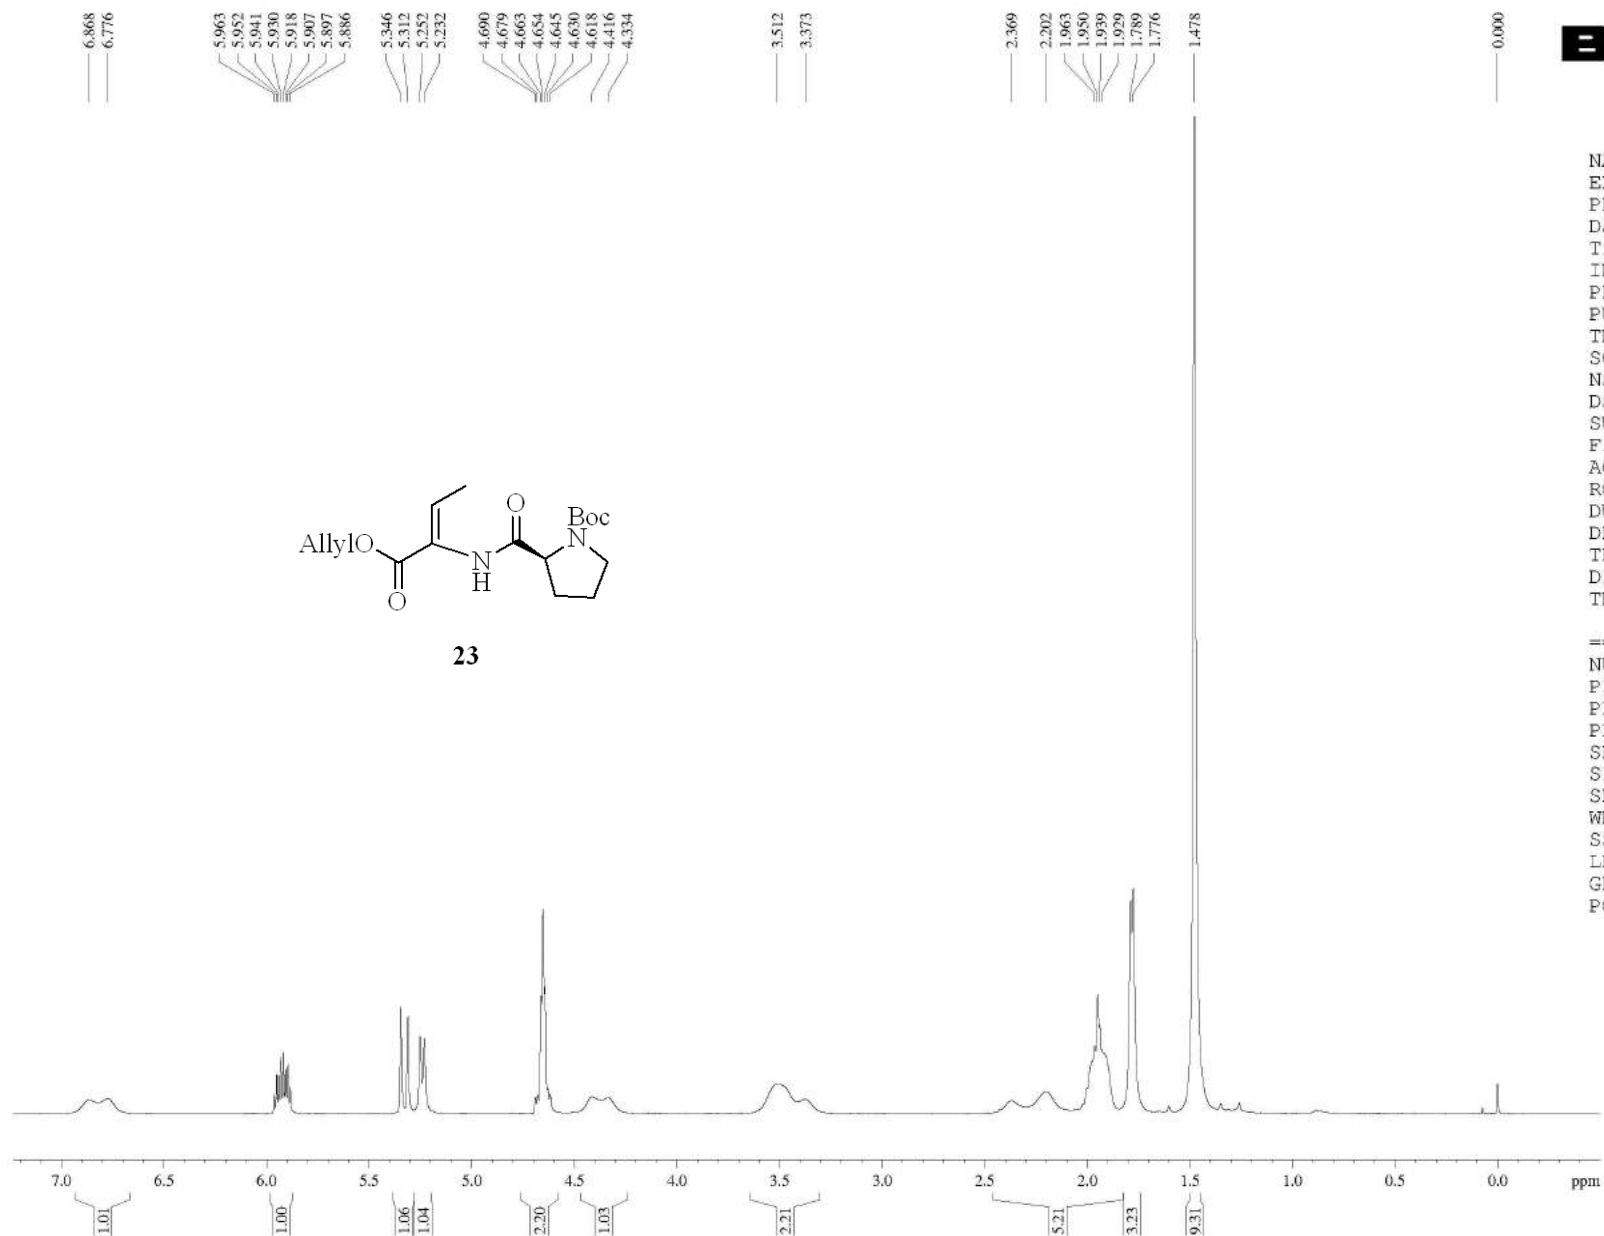

liushouxin-Thr-L-Pro

171.25  
170.47  
164.01  
155.97  
154.86  
134.65  
133.47  
132.04  
126.70  
125.68  
118.76  
118.30

80.91  
80.64  
77.41  
77.15  
76.90  
65.86  
61.56  
60.11  
47.23  
31.43  
28.43  
24.68  
23.77  
14.82  
14.38

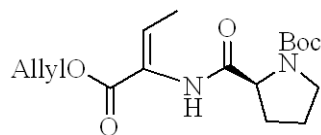

23

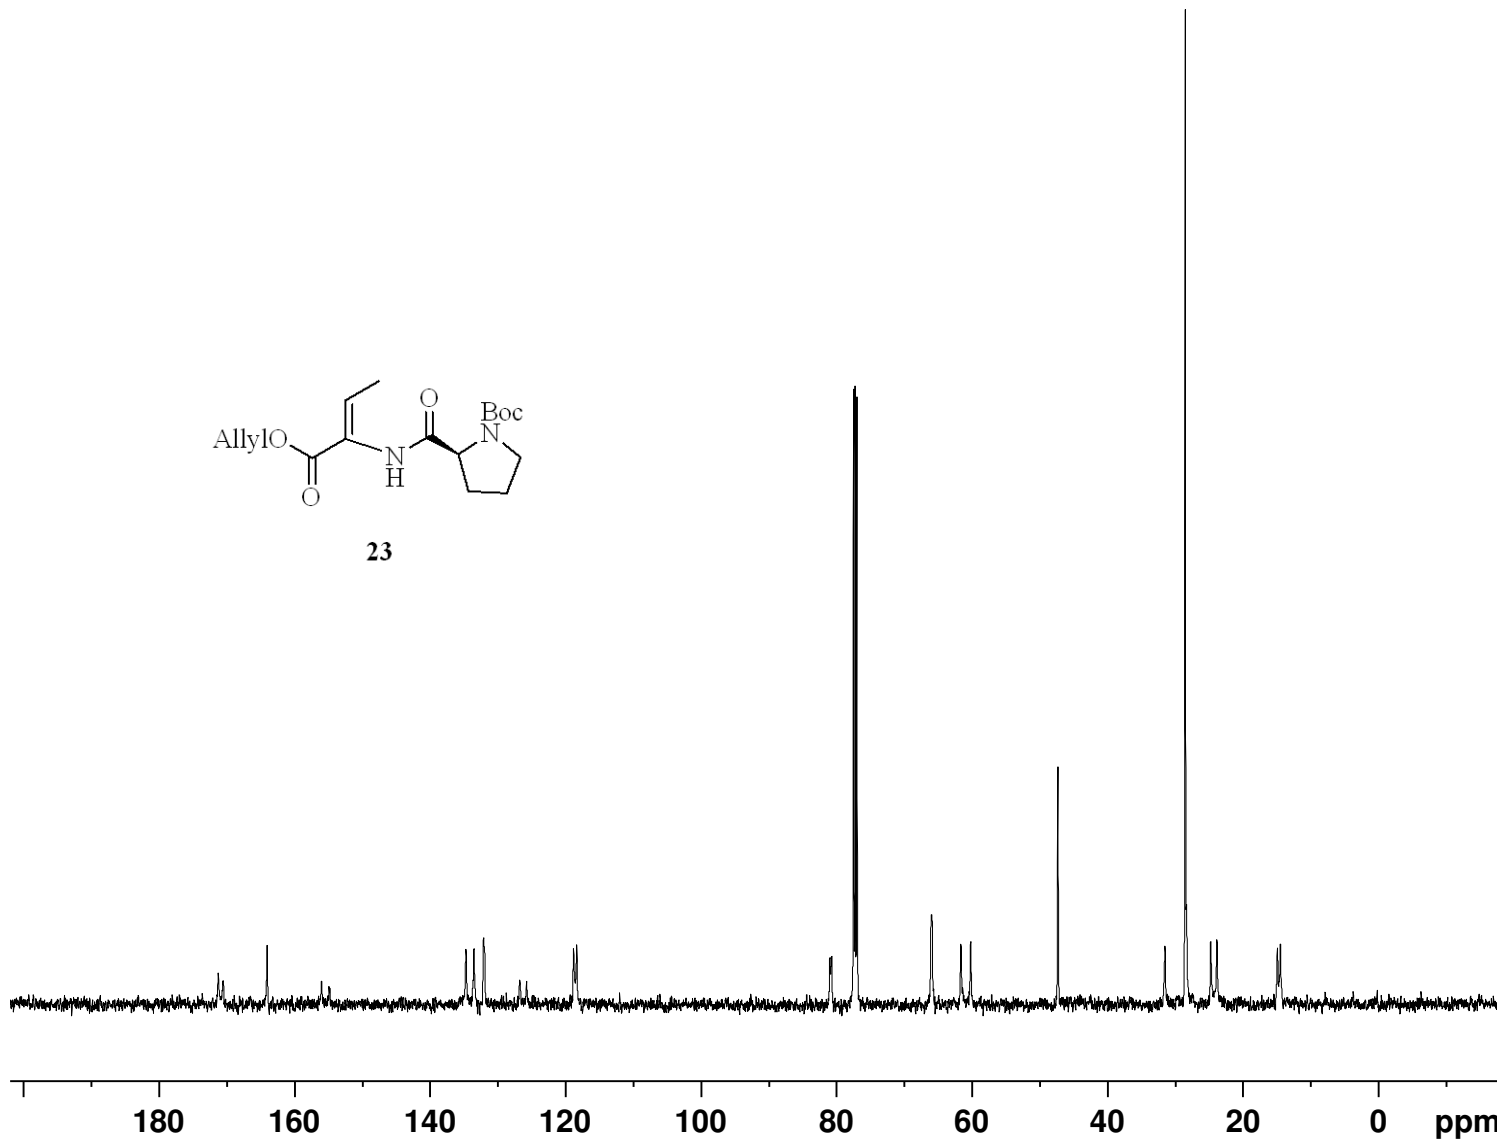

S59

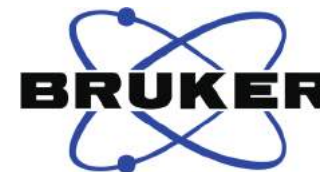

Current Data Parameters  
NAME xuehong  
EXPNO 1  
PROCNO 1

F2 - Acquisition Parameters  
Date\_ 20211102  
Time 12.04  
INSTRUM spect  
PROBHD 5 mm PABBO BB-  
PULPROG zgpg30  
TD 4096  
SOLVENT CDCl3  
NS 396  
DS 0  
SWH 29761.904 Hz  
FIDRES 3.633045 Hz  
AQ 0.1376256 sec  
RG 2050  
DW 16.800 usec  
DE 6.50 usec  
TE 293.8 K  
D1 2.00000000 sec  
D11 0.03000000 sec  
TD0 1

==== CHANNEL f1 =====  
NUC1 13C  
P1 12.30 usec  
PL1 4.50 dB  
PL1W 33.60015869 W  
SFO1 125.7703643 MHz

==== CHANNEL f2 =====  
CPDPRG[2] waltz16  
NUC2 1H  
PCPD2 80.00 usec  
PL2 2.00 dB  
PL12 17.78 dB  
PL13 17.78 dB  
PL2W 16.79986763 W  
PL12W 0.44392112 W  
PL13W 0.44392112 W  
SFO2 500.1320005 MHz

F2 - Processing parameters  
SI 32768  
SF 125.7577799 MHz  
WDW EM  
SSB 0  
LB 4.00 Hz  
GB 0  
PC 1.40

liu shou xin

Thr-I-Leu2

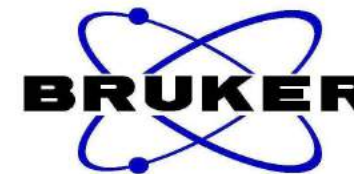

NAME 2012.07.25  
EXPNO 5  
PROCNO 1  
Date\_ 20120724  
Time 21.28  
INSTRUM spect  
PROBHD 5 mm PABBO BB-  
PULPROG zg30  
TD 65536  
SOLVENT CDCl3  
NS 1  
DS 2  
SWH 10330.578  
FIDRES 0.157632  
AQ 3.1719923  
RG 90.5  
DW 48.400  
DE 6.50  
TE 299.3  
D1 1.00000000  
TD0 1

===== CHANNEL f1 =====  
NUC1 1H  
P1 13.00  
PL1 2.00  
PL1W 16.79986763  
SFO1 500.1330885  
SI 32768  
SF 500.1300083  
WDW EM  
SSB 0  
LB 1.00  
GB 0  
PC 1.00

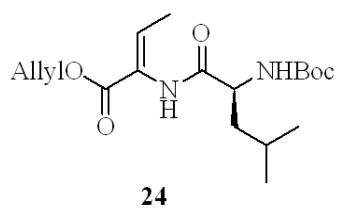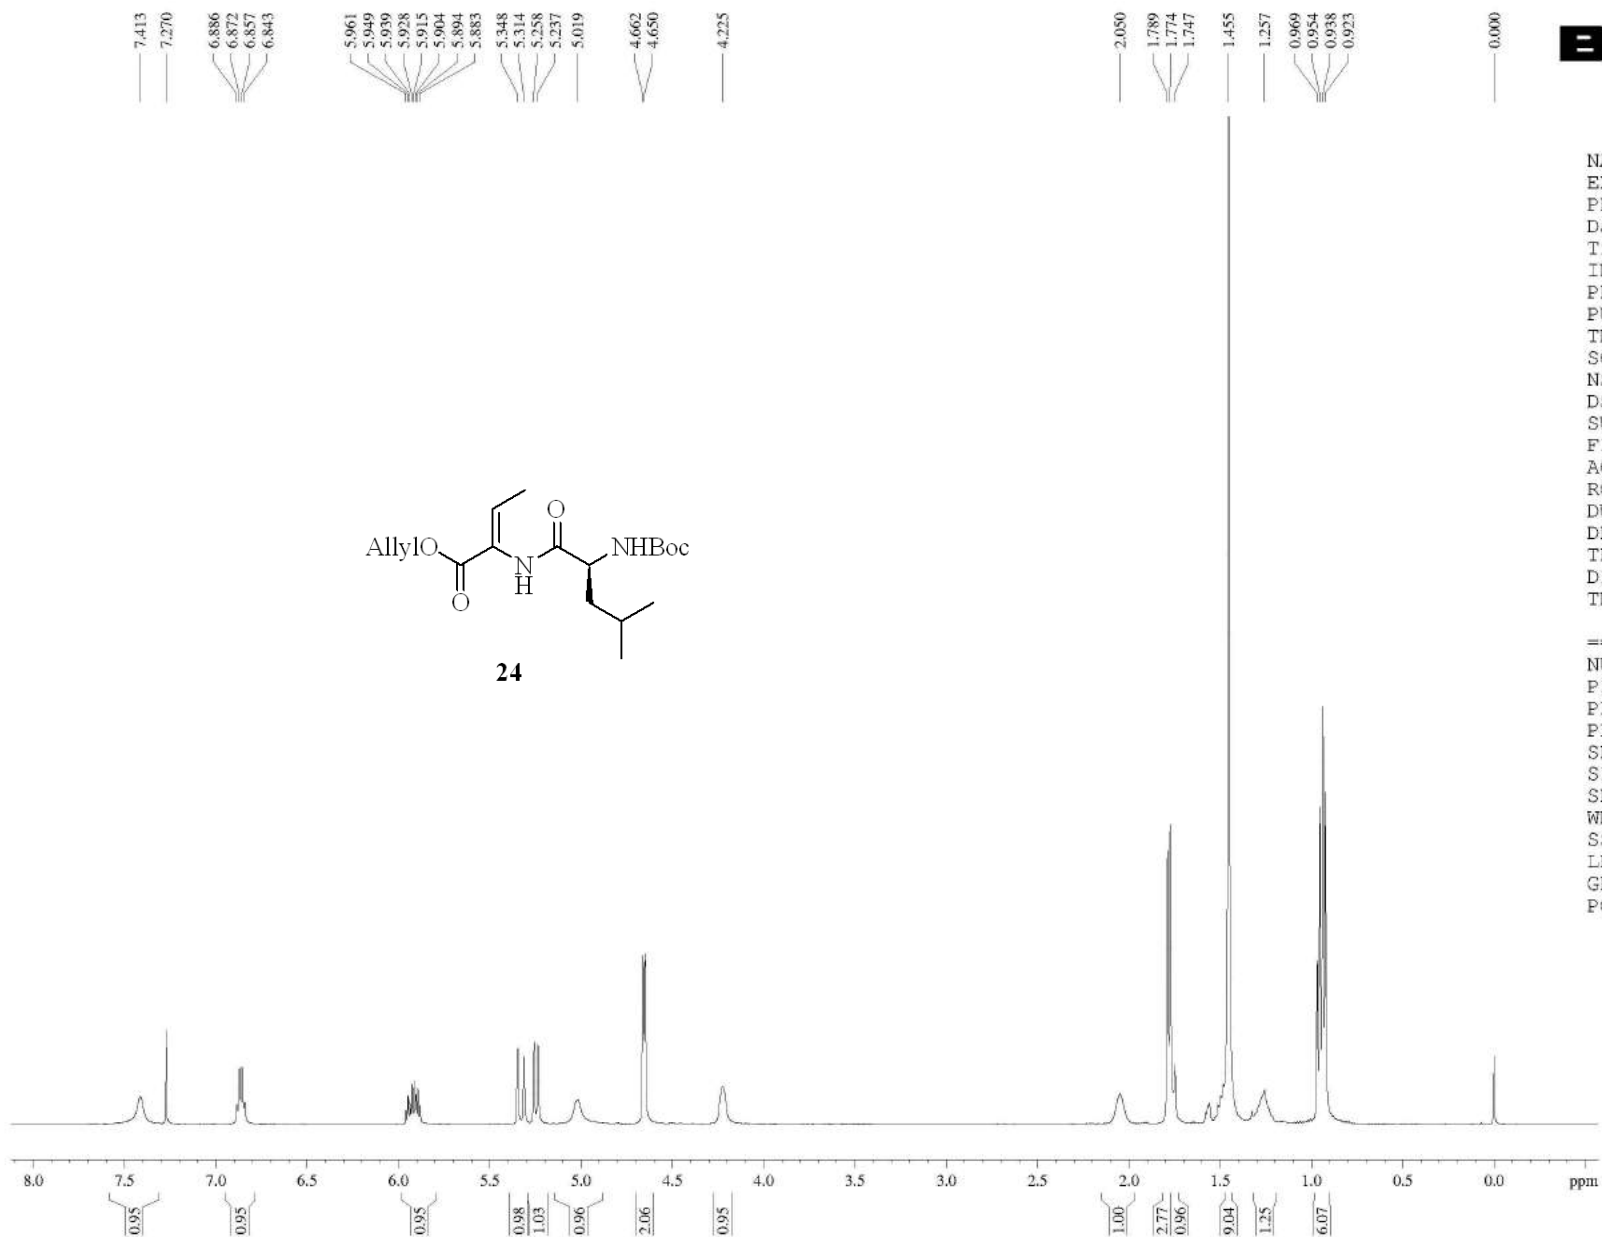



liushouxin-Thr-L-Leu

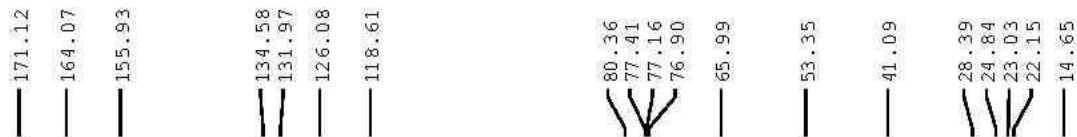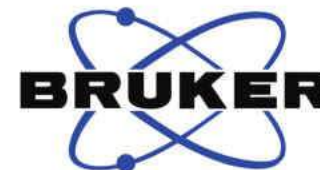

Current Data Parameters  
 NAME xuehong  
 EXPNO 6  
 PROCNO 1

F2 - Acquisition Parameters  
 Date\_ 20211108  
 Time 11.47  
 INSTRUM spect  
 PROBHD 5 mm PABBO BB-  
 PULPROG zgpg30  
 TD 2048  
 SOLVENT CDCl3  
 NS 198  
 DS 0  
 SWH 29761.904 Hz  
 FIDRES 3.633045 Hz  
 AQ 0.1376256 sec  
 RG 2050  
 DW 16.800 usec  
 DE 6.50 usec  
 TE 293.9 K  
 D1 2.00000000 sec  
 D11 0.03000000 sec  
 TDO 1

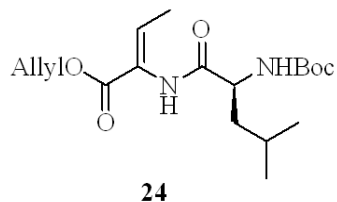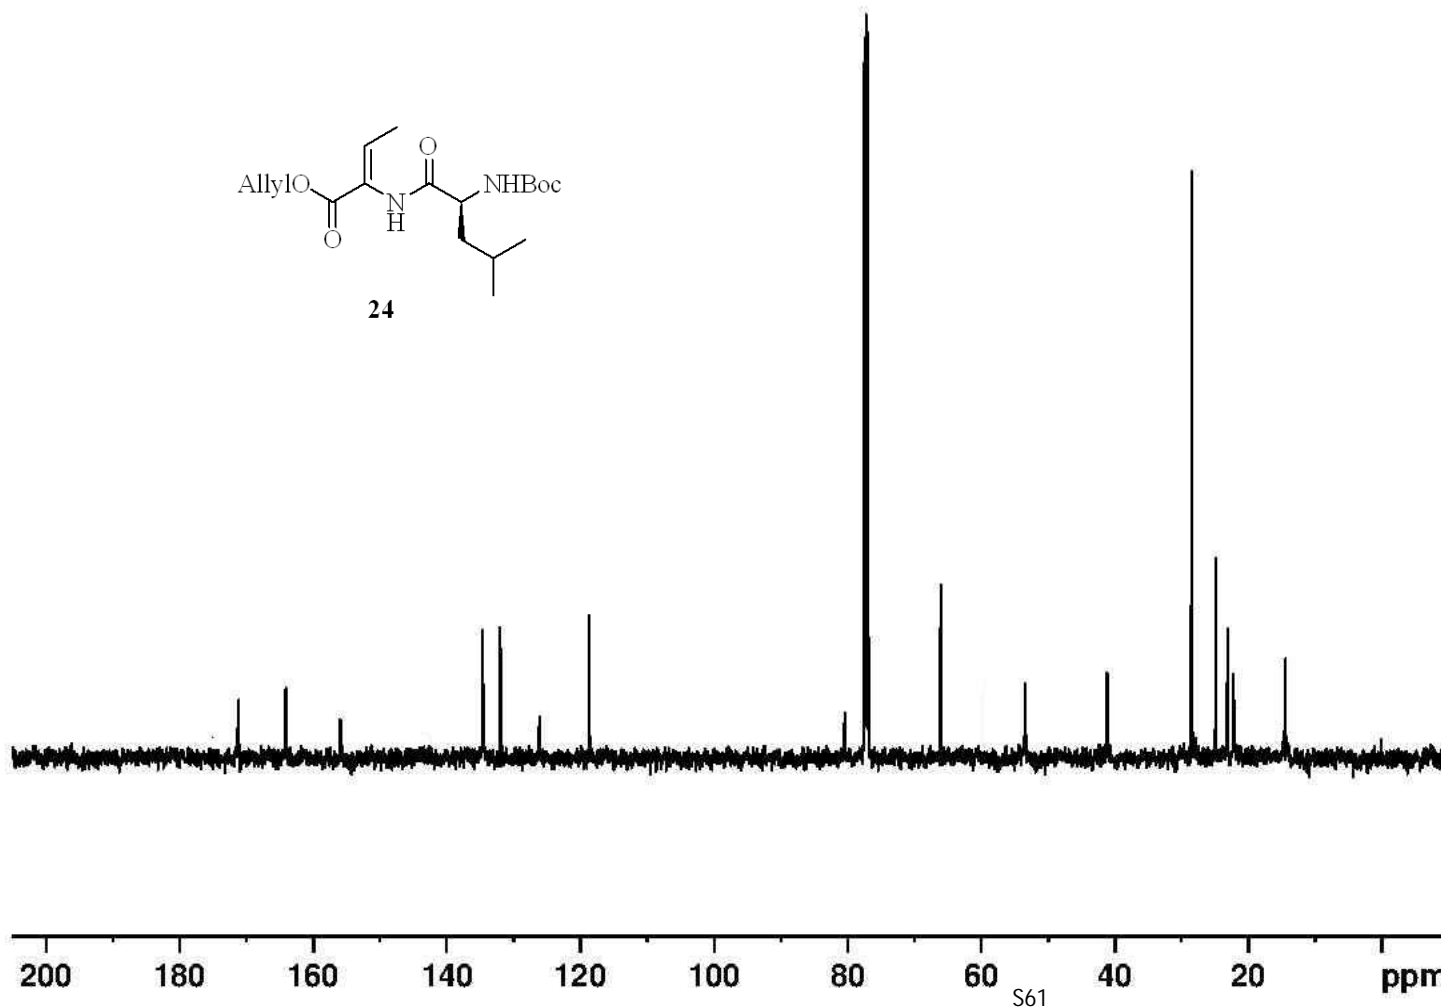

----- CHANNEL f1 -----  
 NUC1 13C  
 P1 12.30 usec  
 PL1 4.50 dB  
 PL1W 33.60015869 W  
 SFO1 125.7703643 MHz

----- CHANNEL f2 -----  
 CPDPRG[2] waltz16  
 NUC2 1H  
 PCPD2 80.00 usec  
 PL2 2.00 dB  
 PL12 17.78 dB  
 PL13 17.78 dB  
 PL2W 16.79986763 W  
 PL12W 0.44392112 W  
 PL13W 0.44392112 W  
 SFO2 500.1320005 MHz

F2 - Processing parameters  
 SI 32768  
 SF 125.7577754 MHz  
 WDW EM  
 SSB 0  
 LB 4.00 Hz  
 GB 0  
 PC 1.40

liu shou xin THR-Val-H2O2



NAME 2012.07.24  
EXPNO 5  
PROCNO 1  
Date\_ 20120723  
Time 21.29  
INSTRUM spect  
PROBHD 5 mm PABBO BB-  
PULPROG zg30  
TD 65536  
SOLVENT CDCl3  
NS 1  
DS 2  
SWH 10330.578  
FIDRES 0.157632  
AQ 3.1719923  
RG 144  
DW 48.400  
DE 6.50  
TE 299.1  
D1 1.00000000  
TD0 1

=====  
CHANNEL f1  
=====  
NUC1 1H  
P1 13.00  
PL1 2.00  
PL1W 16.79986763  
SFO1 500.1330885  
SI 32768  
SF 500.1299938  
WDW EM  
SSB 0  
LB 0.30  
GB 0  
PC 1.00

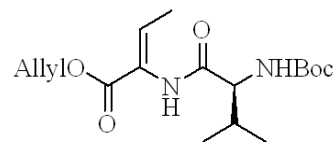

25

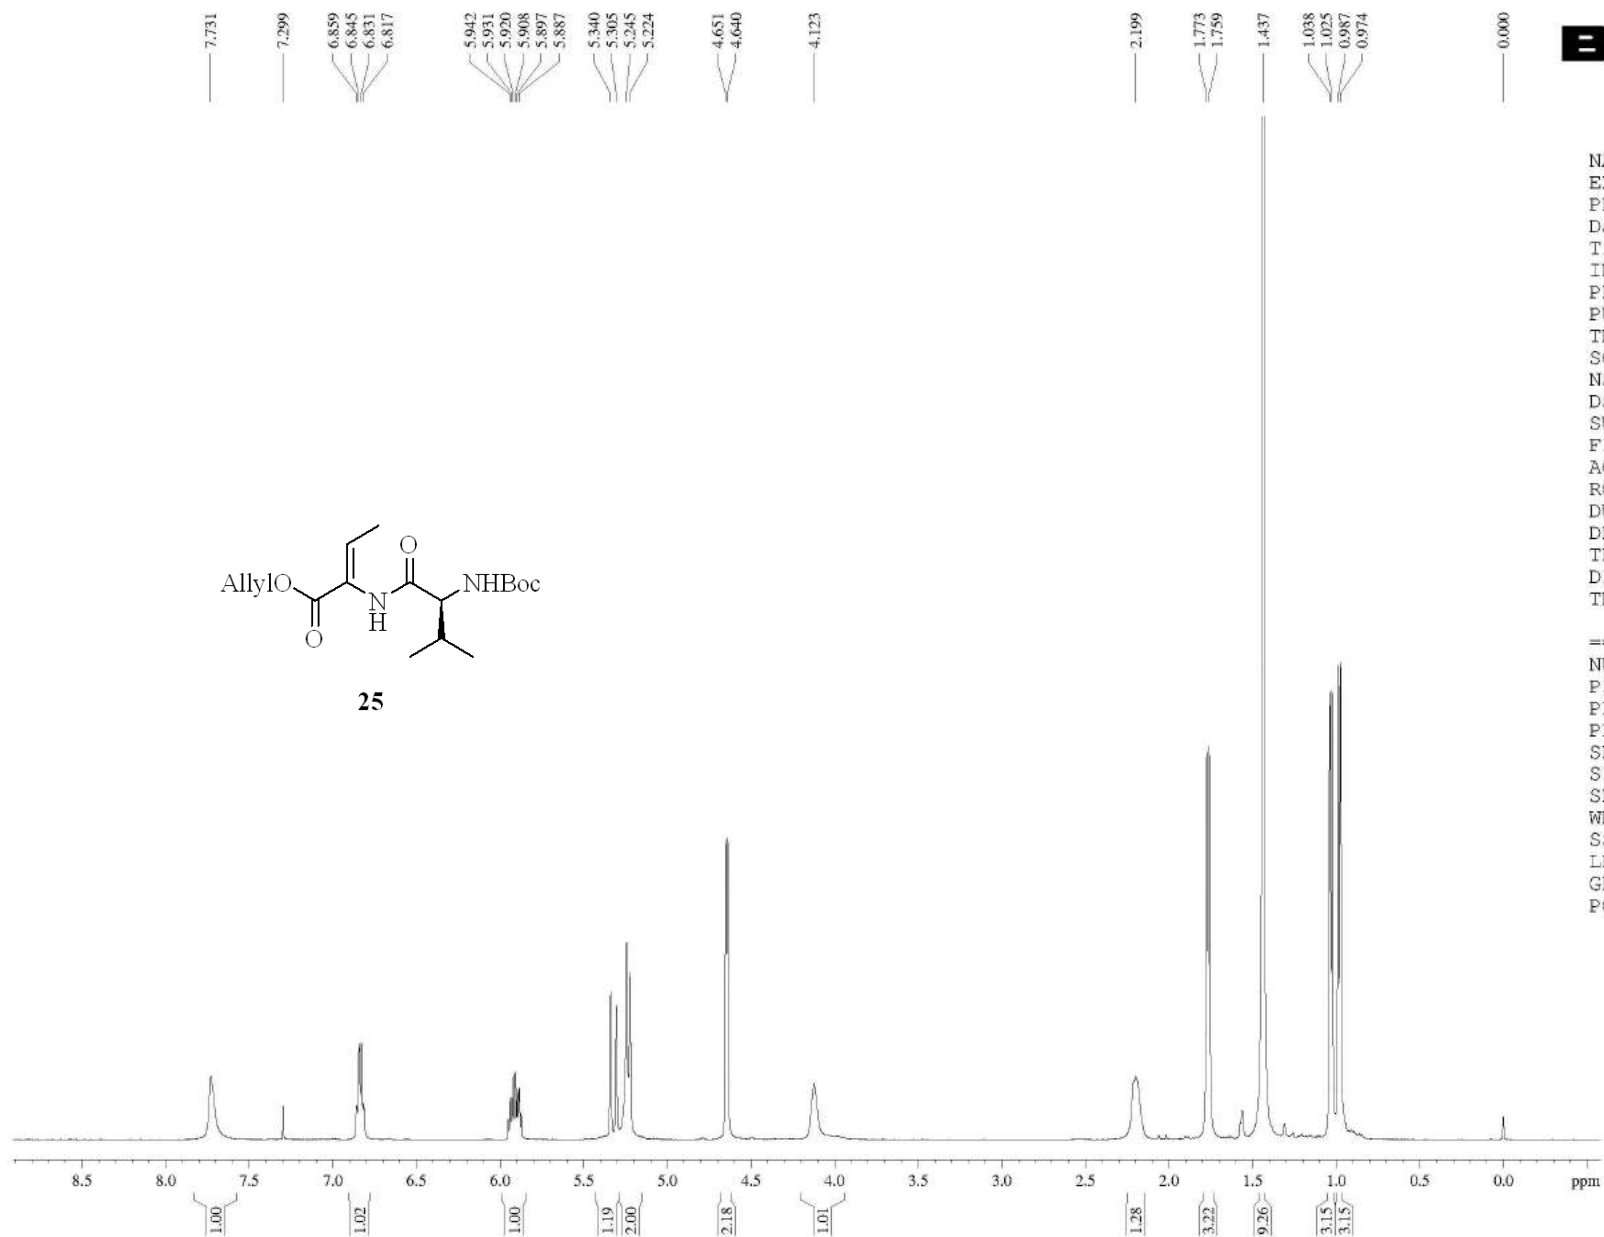

liushouxin-Thr-L-Val

170.51  
164.01  
156.05  
134.73  
131.90  
126.21  
118.57

79.99  
77.41  
77.16  
76.90  
65.93  
60.04

30.94  
28.33  
19.35  
17.90  
14.53

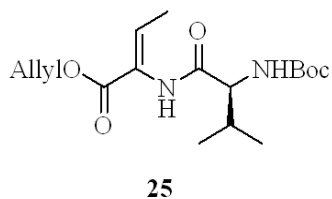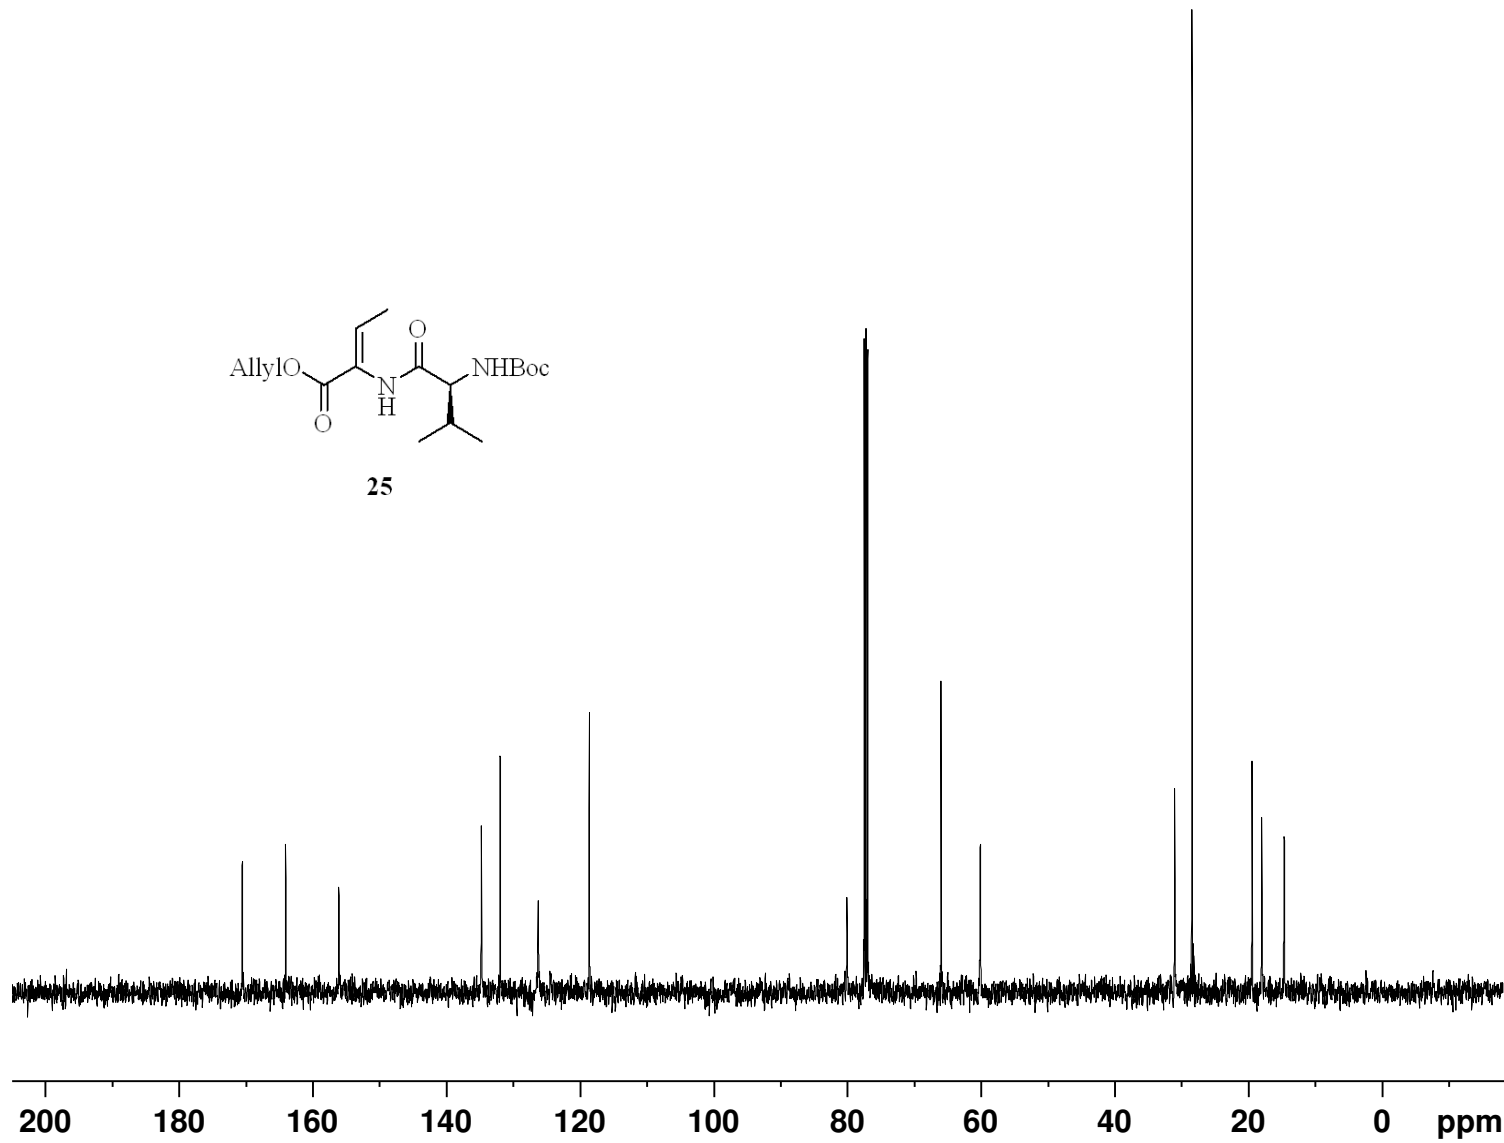

Current Data Parameters  
NAME xuehong  
EXPNO 2  
PROCNO 1

F2 - Acquisition Parameters  
Date\_ 20211102  
Time 14.05  
INSTRUM spect  
PROBHD 5 mm PABBO BB-  
PULPROG zgpg30  
TD 8192  
SOLVENT CDC13  
NS 152  
DS 0  
SWH 29761.904 Hz  
FIDRES 3.633045 Hz  
AQ 0.1376256 sec  
RG 2050  
DW 16.800 usec  
DE 6.50 usec  
TE 293.7 K  
D1 2.00000000 sec  
D11 0.03000000 sec  
TD0 1

==== CHANNEL f1 =====  
NUC1 13C  
P1 12.30 usec  
PL1 4.50 dB  
PL1W 33.60015869 W  
SFO1 125.7703643 MHz

==== CHANNEL f2 =====  
CPDPRG[2] waltz16  
NUC2 1H  
PCPD2 80.00 usec  
PL2 2.00 dB  
PL12 17.78 dB  
PL13 17.78 dB  
PL2W 16.79986763 W  
PL12W 0.44392112 W  
PL13W 0.44392112 W  
SFO2 500.1320005 MHz

F2 - Processing parameters  
SI 32768  
SF 125.7577813 MHz  
WDW EM  
SSB 0  
LB 3.00 Hz  
GB 0  
PC 1.40

liu shou xin Thr-I-Leu



```

NAME      2012.07.24
EXPNO     9
PROCNO    1
Date_     20120723
Time      21.52
INSTRUM   spect
PROBHD    5 mm PABBO BB-
PULPROG   zg30
TD        65536
SOLVENT   CDCl3
NS        4
DS        2
SWH       10330.578
FIDRES    0.157632
AQ        3.1719923
RG        322
DW        48.400
DE        6.50
TE        299.1
D1        1.00000000
TD0       1
    
```

```

===== CHANNEL f1 =====
NUC1      1H
P1        13.00
PL1       2.00
PL1W      16.79986763
SFO1      500.1330885
SI        32768
SF        500.1300115
WDW       EM
SSB       0
LB        0.30
GB        0
PC        1.00
    
```

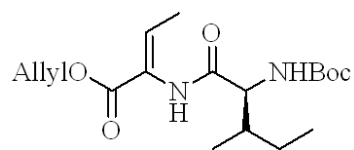

26

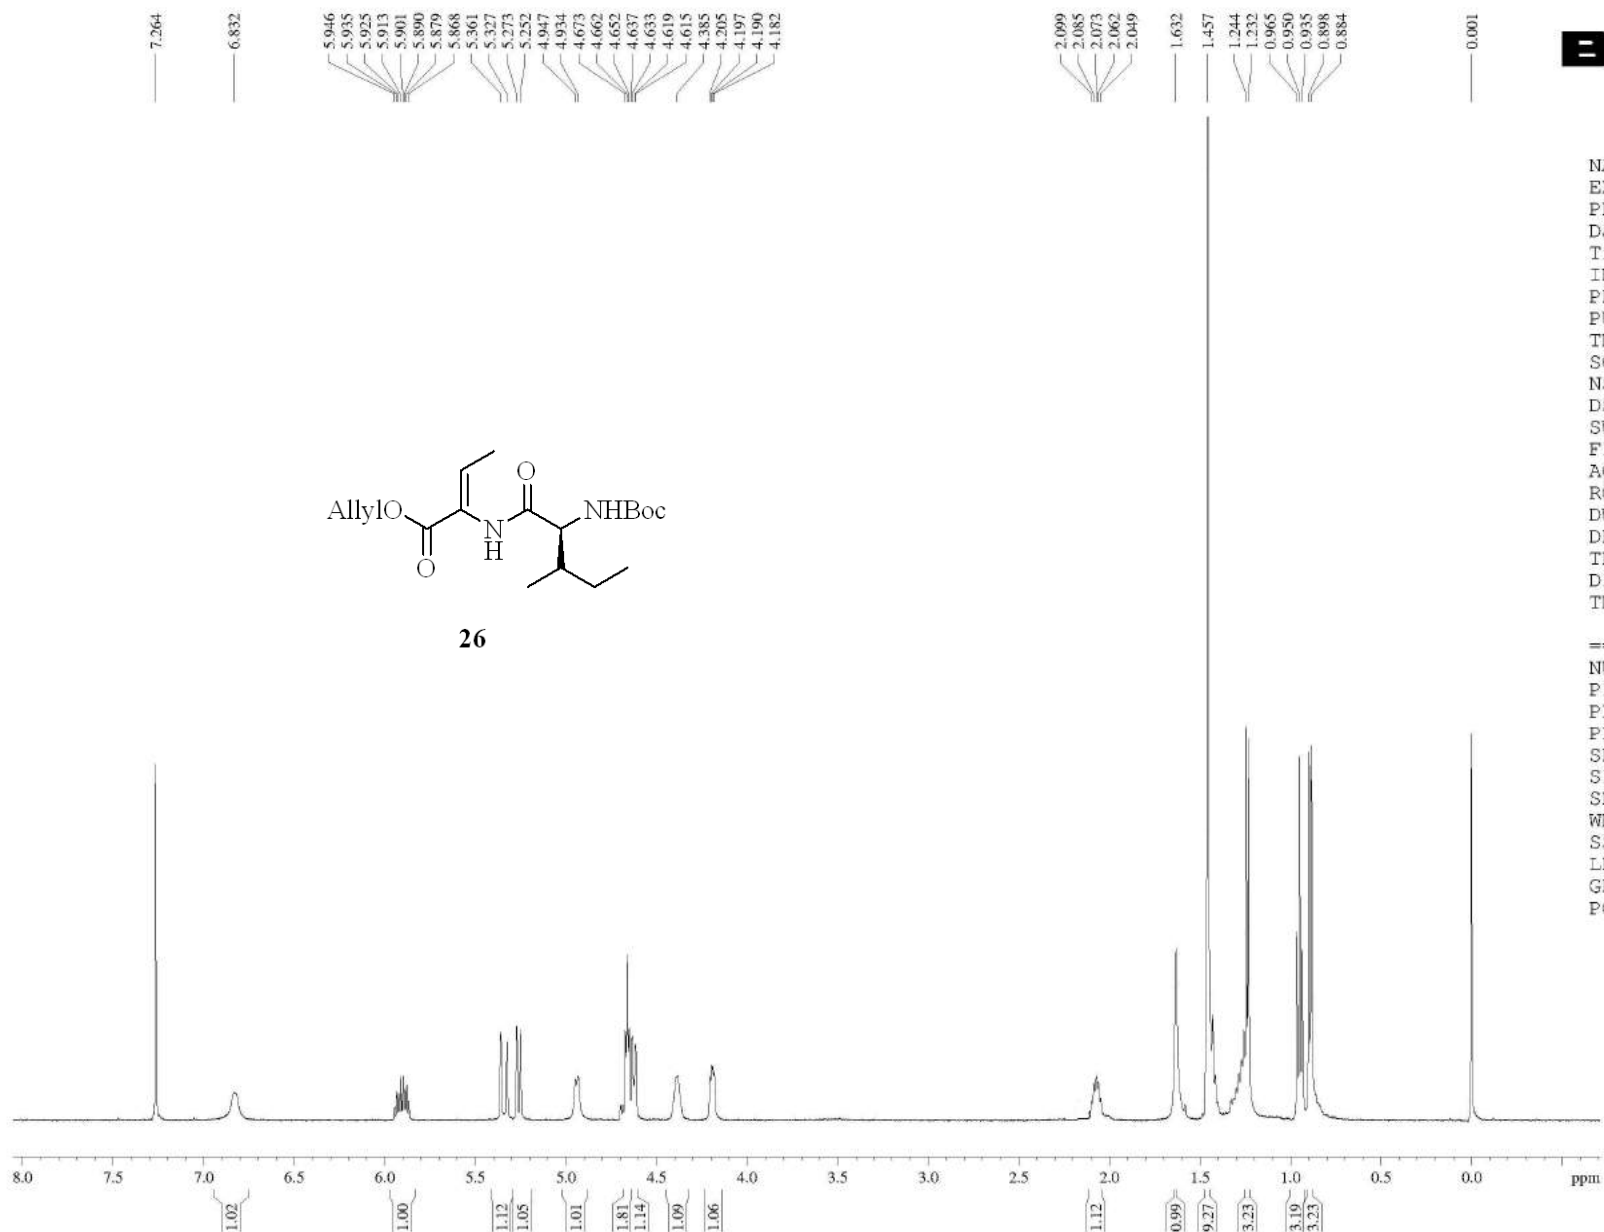

liushouxin-Thr-L-Ileu

170.50  
164.11  
156.03  
134.80  
131.93  
125.93  
118.73  
80.28  
77.41  
77.16  
76.90  
66.07  
58.54  
37.18  
28.39  
26.48  
14.83  
14.42  
11.82

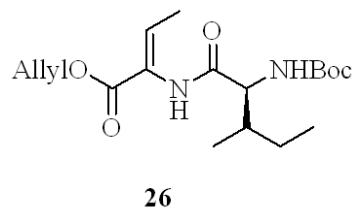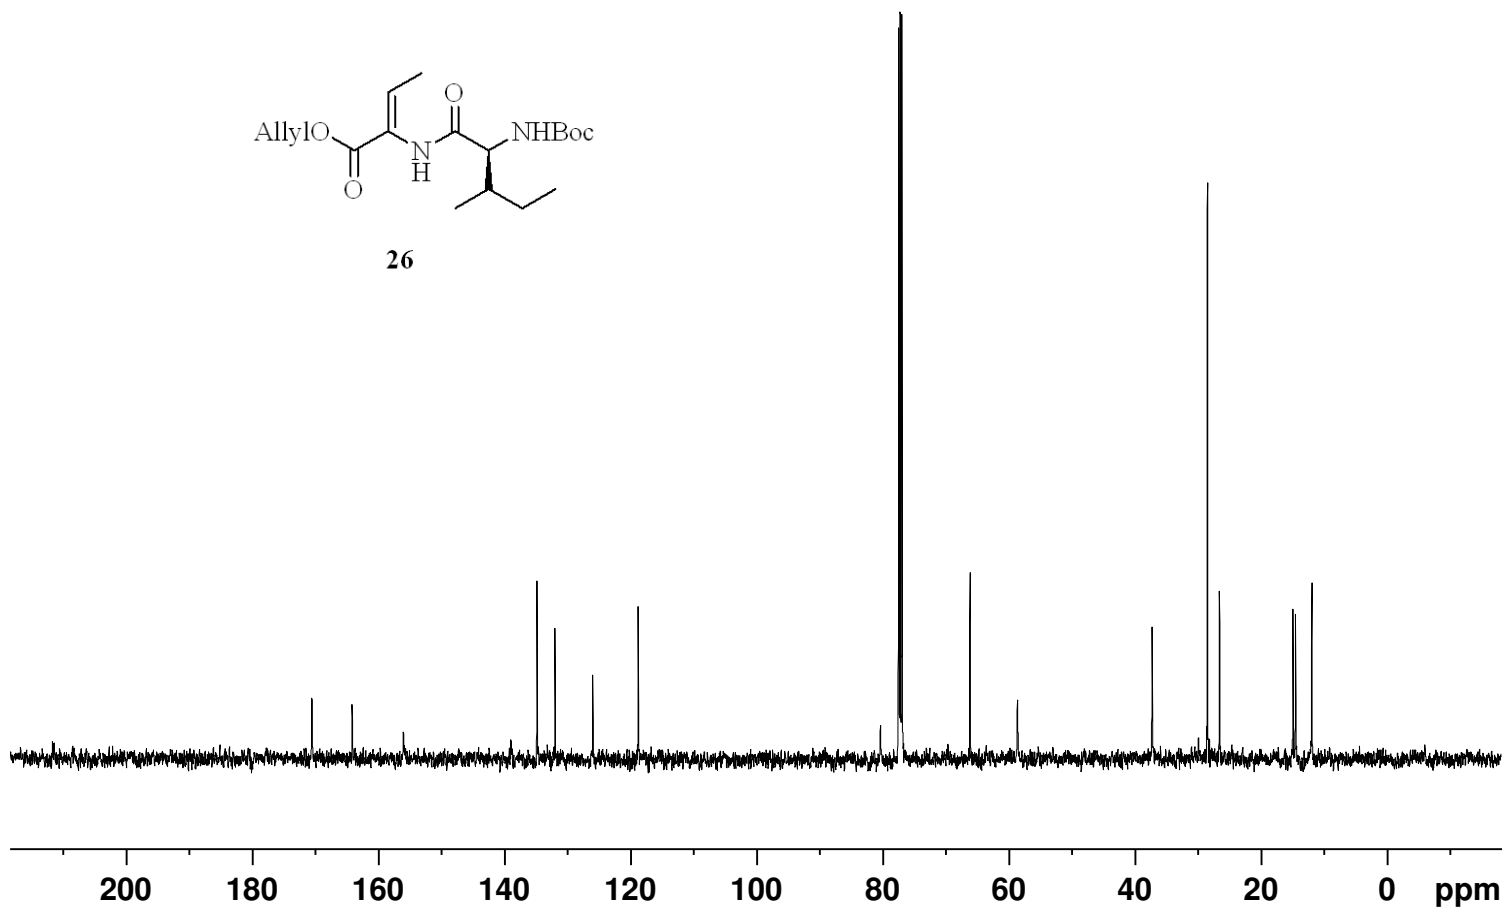

S65



Current Data Parameters  
NAME xuehong  
EXPNO 5  
PROCNO 1

F2 - Acquisition Parameters  
Date\_ 20211103  
Time 10.24  
INSTRUM spect  
PROBHD 5 mm PABBO BB-  
PULPROG zgpg30  
TD 8192  
SOLVENT CDC13  
NS 399  
DS 0  
SWH 29761.904 Hz  
FIDRES 3.633045 Hz  
AQ 0.1376256 sec  
RG 2050  
DW 16.800 usec  
DE 6.50 usec  
TE 293.7 K  
D1 2.00000000 sec  
D11 0.03000000 sec  
TD0 1

==== CHANNEL f1 =====  
NUC1 13C  
P1 12.30 usec  
PL1 4.50 dB  
PL1W 33.60015869 W  
SFO1 125.7703643 MHz

==== CHANNEL f2 =====  
CPDPRG[2] waltz16  
NUC2 1H  
PCPD2 80.00 usec  
PL2 2.00 dB  
PL12 17.78 dB  
PL13 17.78 dB  
PL2W 16.79986763 W  
PL12W 0.44392112 W  
PL13W 0.44392112 W  
SFO2 500.1320005 MHz

F2 - Processing parameters  
SI 32768  
SF 125.7577750 MHz  
WDW EM  
SSB 0  
LB 4.00 Hz  
GB 0  
PC 1.40

liushouxin-20170728-ZY

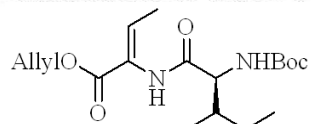

26

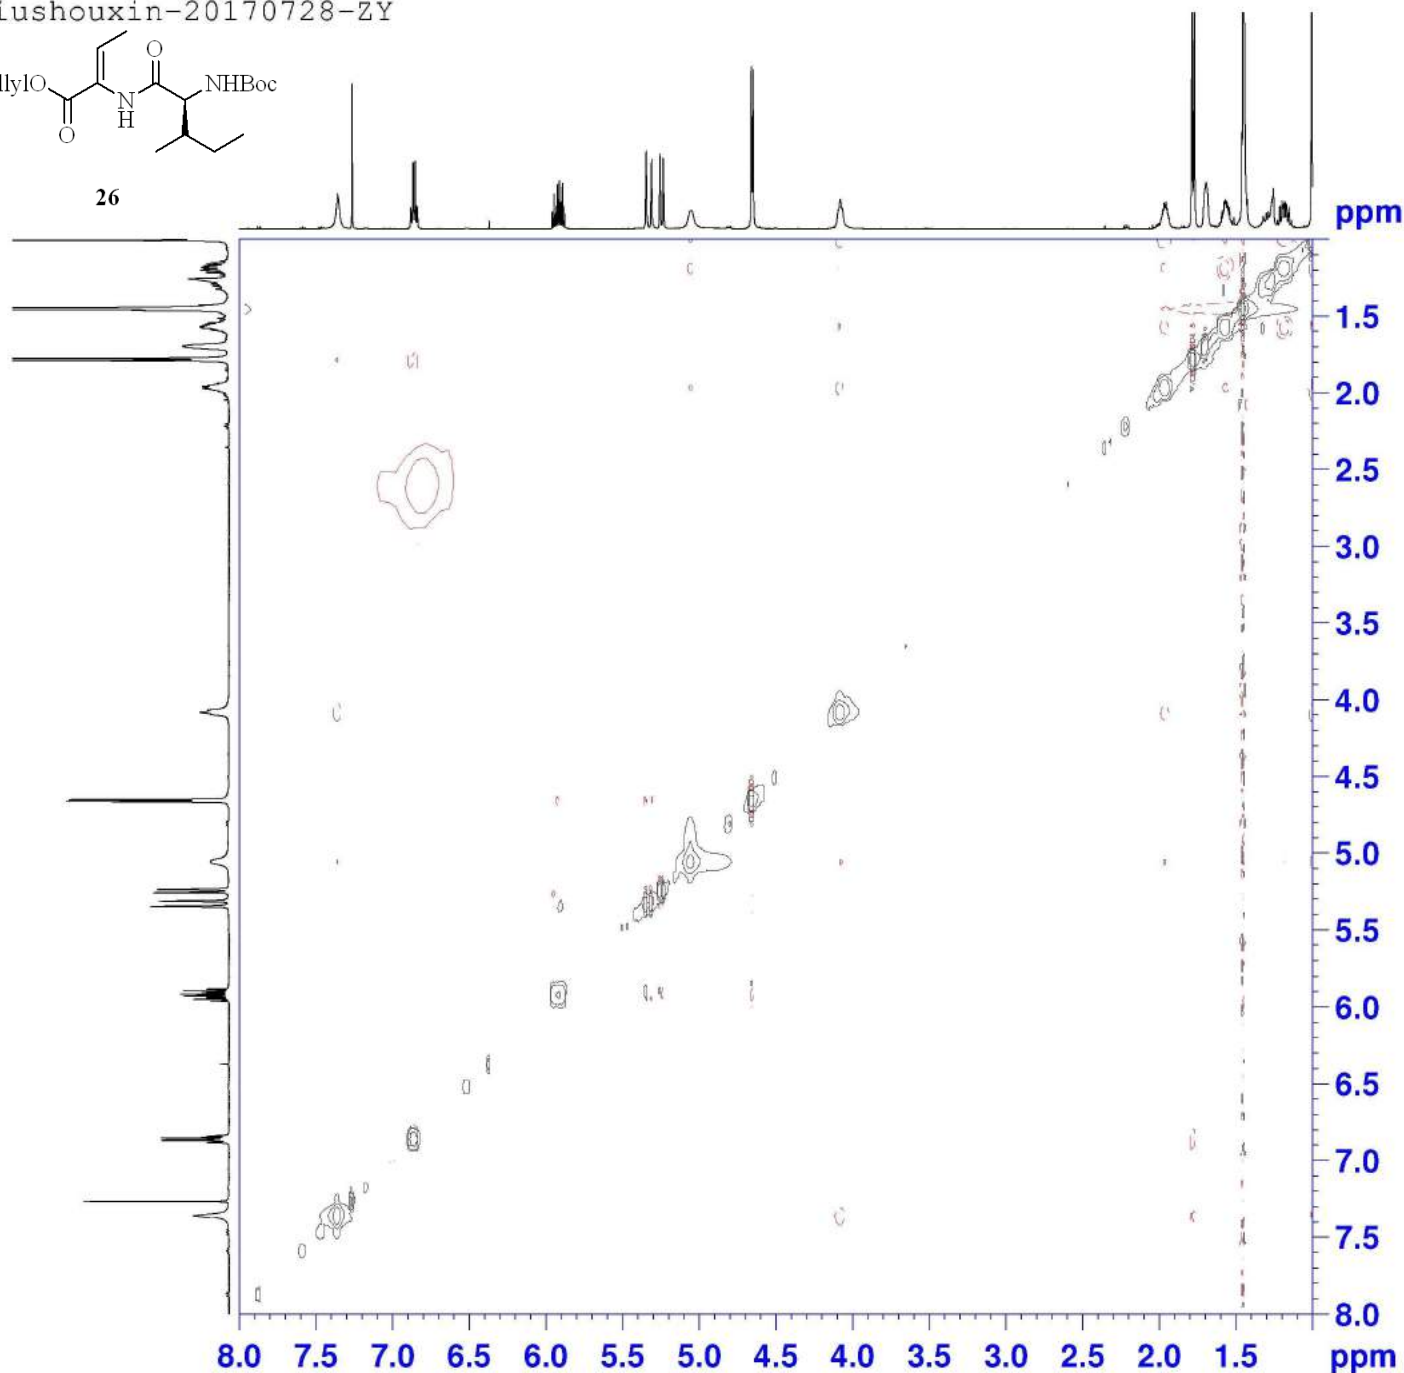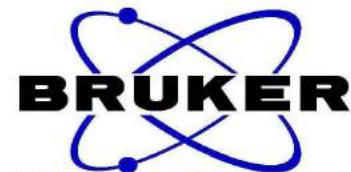

NAME 2017.07.28  
EXPNO 10  
PROCNO 1  
Date\_ 20170728  
Time 14.38  
INSTRUM spect  
PROBHD 5 mm PADUL 13C  
PULPROG noesygpph  
TD 2048  
SOLVENT CDCl3  
NS 16  
DS 8  
SWH 4504.504 Hz  
FIDRES 2.199465 Hz  
AQ 0.2273780 sec  
RG 456  
DW 111.000 usec  
DE 6.50 usec  
TE 298.3 K  
D0 0.00009453 sec  
D1 1.00000000 sec  
D8 0.60000002 sec  
D16 0.00020000 sec  
IN0 0.00022215 sec

===== CHANNEL f1 =====  
NUC1 1H  
P1 13.00 usec  
P2 26.00 usec  
PL1 2.00 dB  
PL1W 16.79986763 W  
SFO1 500.1317505 MHz

===== GRADIENT CHANNEL =====  
GPNAM1 SINE.100  
GPNAM2 SINE.100  
GPZ1 40.00 %  
GPZ2 -40.00 %  
P16 1500.00 usec  
ND0 1  
TD 256  
SFO1 500.1318 MHz  
FIDRES 17.582756 Hz  
SW 9.000 ppm  
FnMODE States-IPPI  
SI 1024  
SF 500.1300190 MHz  
WDW QSINE  
SSB 2  
LB 0.00 Hz  
GB 0  
PC 1.00  
SI 1024  
MC2 States-IPPI  
SF 500.1300168 MHz  
WDW QSINE  
SSB 2  
LB 0.00 Hz  
GB 0

liu shou xin Thr-D-Leu-H2o(2)

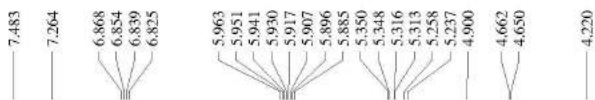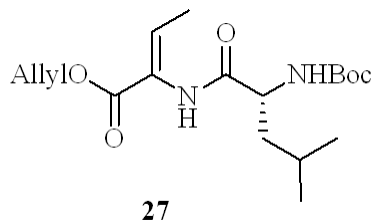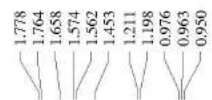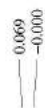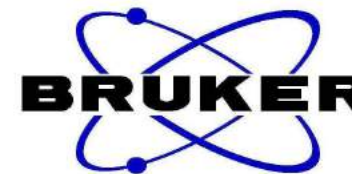

```

NAME          2012.08.06
EXPNO         1
PROCNO        1
Date_         20120806
Time          9.39
INSTRUM       spect
PROBHD        5 mm PABBO BB-
PULPROG       zg30
TD            65536
SOLVENT       CDC13
NS            1
DS            2
SWH           10330.578
FIDRES        0.157632
AQ            3.1719923
RG            256
DW            48.400
DE            6.50
TE            298.6
D1            1.00000000
TD0           1
  
```

```

===== CHANNEL f1 =====
NUC1          1H
P1            13.00
PL1           2.00
PL1W          16.79986763
SFO1          500.1330885
SI            32768
SF            500.1300111
WDW           EM
SSB           0
LB            1.00
GB            0
PC            1.00
  
```

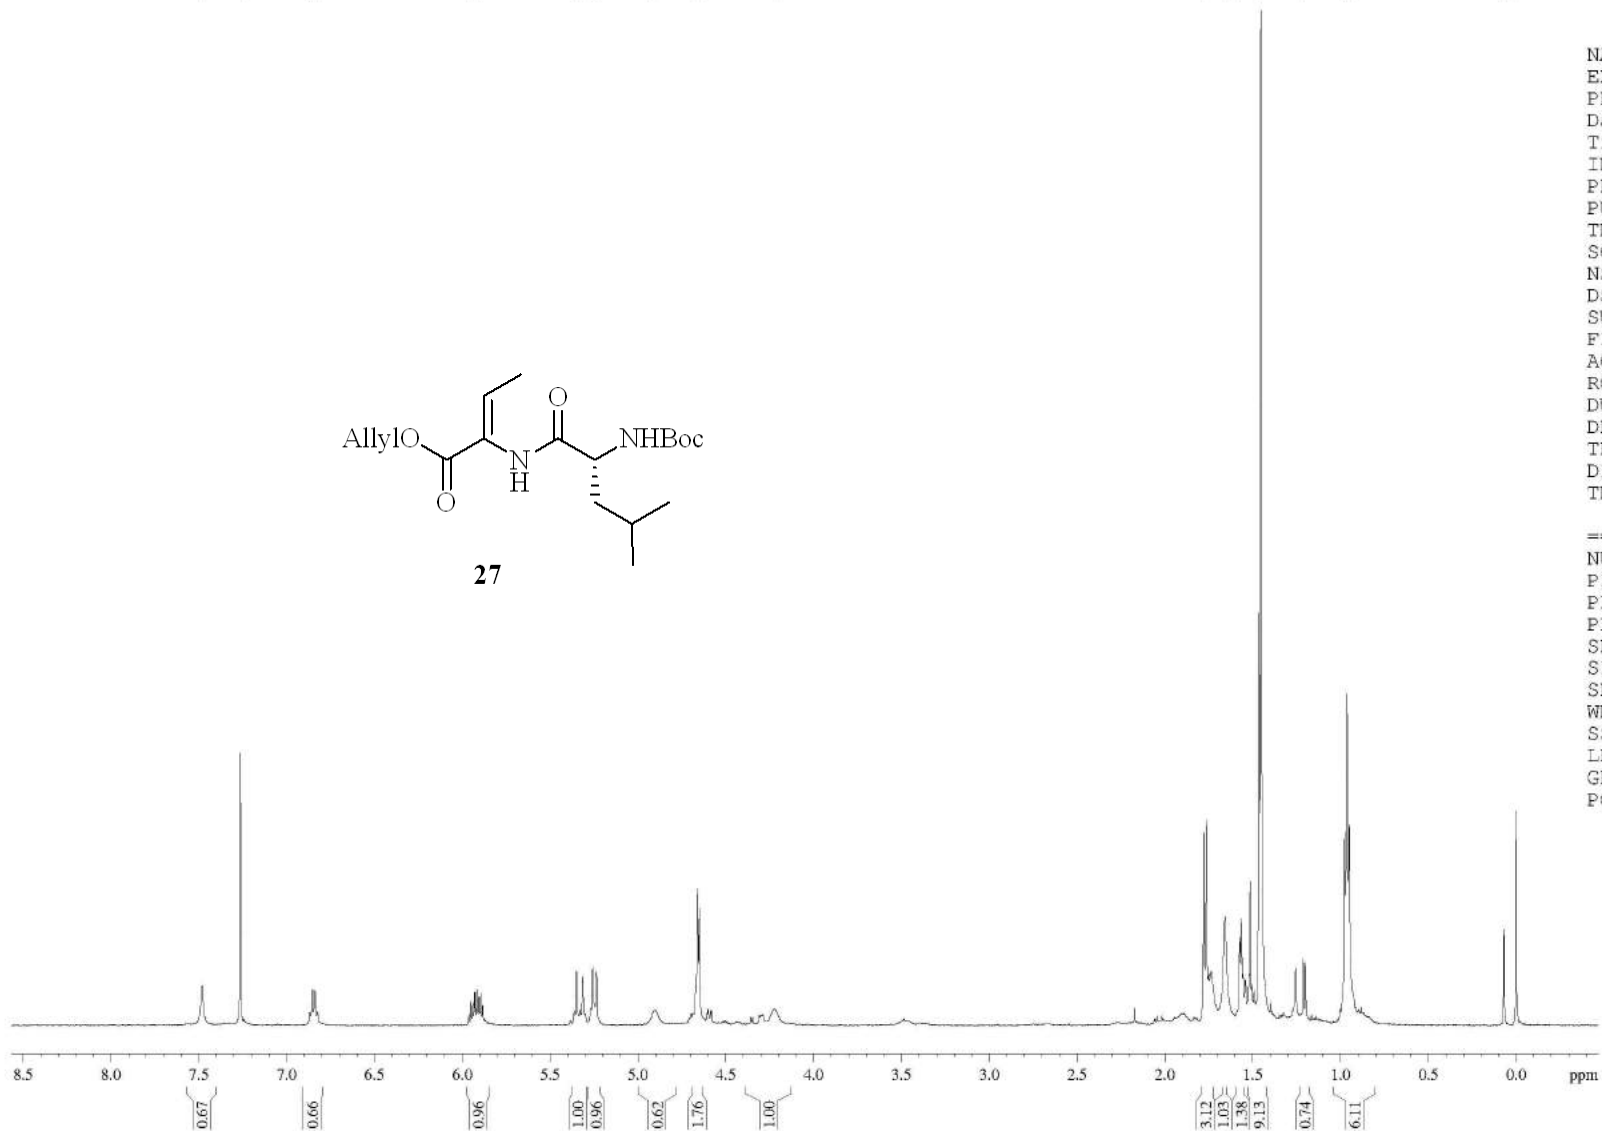

liushouxin-Thr-D-Leu

— 171.12  
 — 164.06  
 — 155.92  
 — 134.57  
 — 131.96  
 — 126.07  
 — 118.60

80.35  
 77.40  
 77.15  
 76.89  
 — 65.98  
 — 53.34  
 — 41.08  
 28.38  
 24.83  
 23.02  
 22.14  
 — 14.64

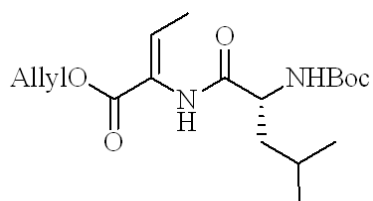

27

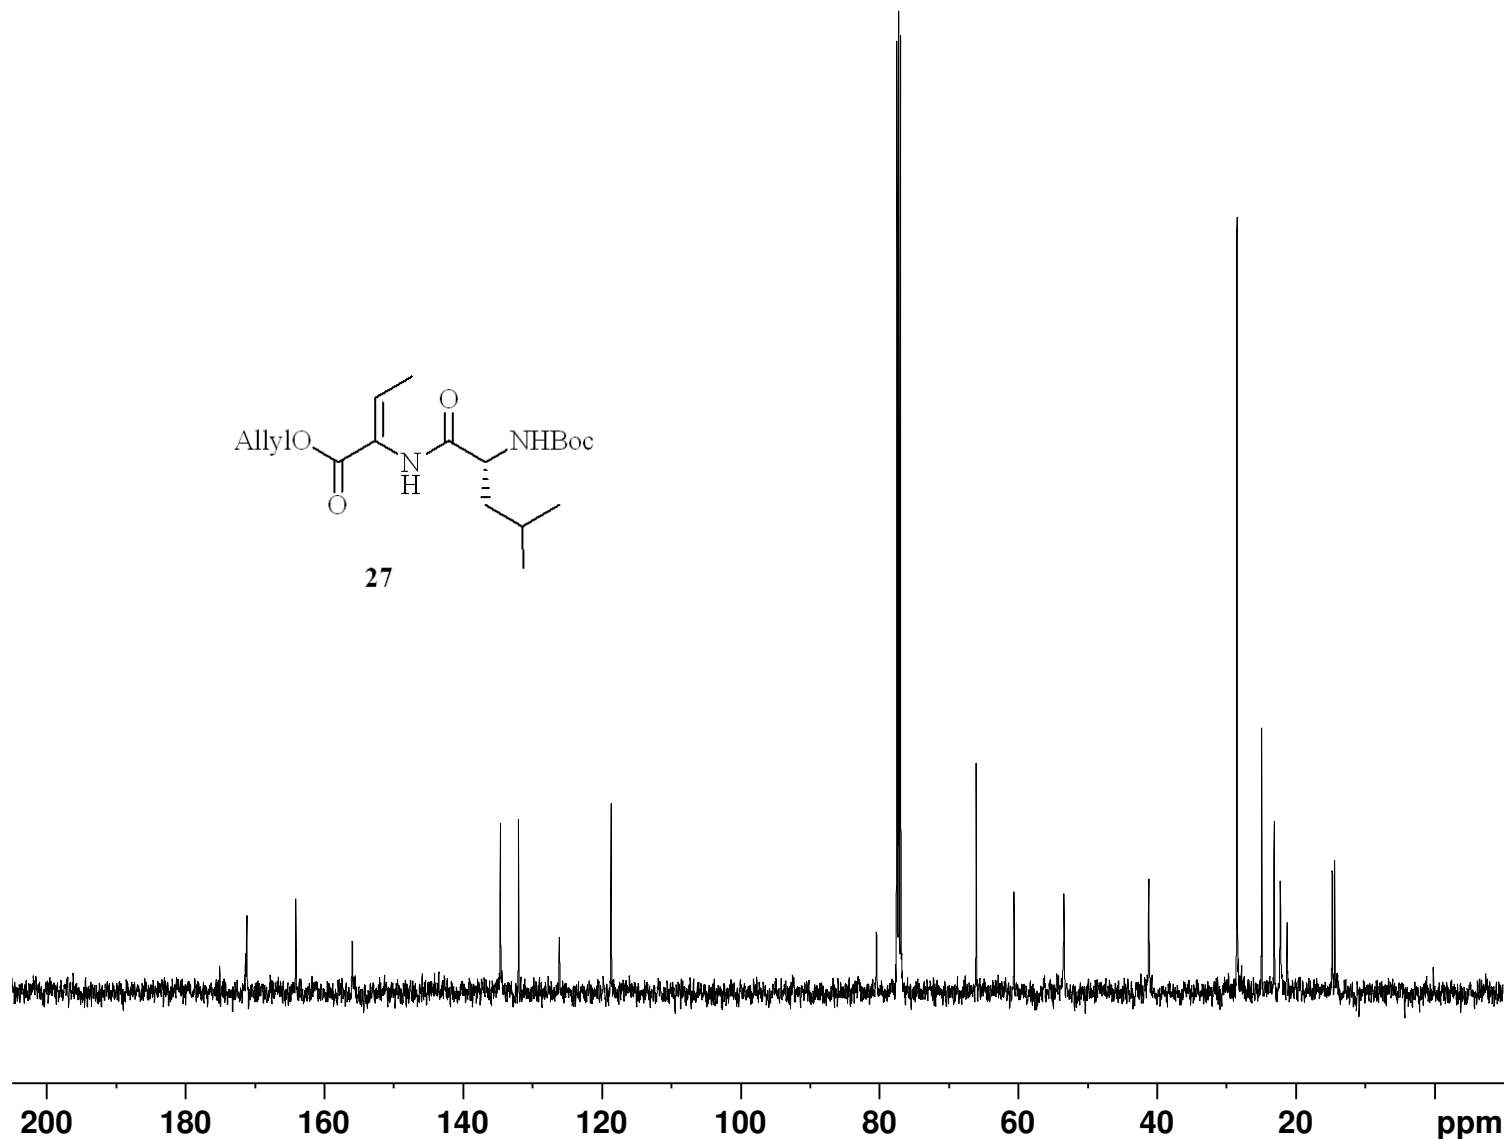

S68



Current Data Parameters  
 NAME xuehong  
 EXPNO 10  
 PROCNO 1

F2 - Acquisition Parameters

Date\_ 20211202  
 Time 17.32  
 INSTRUM spect  
 PROBHD 5 mm PABBO BB-  
 PULPROG zgpg30  
 TD 1024  
 SOLVENT CDCl3  
 NS 209  
 DS 0  
 SWH 29761.904 Hz  
 FIDRES 3.633045 Hz  
 AQ 0.1376256 sec  
 RG 2050  
 DW 16.800 usec  
 DE 6.50 usec  
 TE 293.9 K  
 D1 2.00000000 sec  
 D11 0.03000000 sec  
 TD0 1

==== CHANNEL f1 =====  
 NUC1 13C  
 P1 12.30 usec  
 PL1 4.50 dB  
 PL1W 33.60015869 W  
 SFO1 125.7703643 MHz

==== CHANNEL f2 =====  
 CPDPRG[2] waltz16  
 NUC2 1H  
 PCPD2 80.00 usec  
 PL2 2.00 dB  
 PL12 17.78 dB  
 PL13 17.78 dB  
 PL2W 16.79986763 W  
 PL12W 0.44392112 W  
 PL13W 0.44392112 W  
 SFO2 500.1320005 MHz

F2 - Processing parameters

SI 32768  
 SF 125.7577765 MHz  
 WDW EM  
 SSB 0  
 LB 4.00 Hz  
 GB 0  
 PC 1.40



liushouxin-20170629-ZY

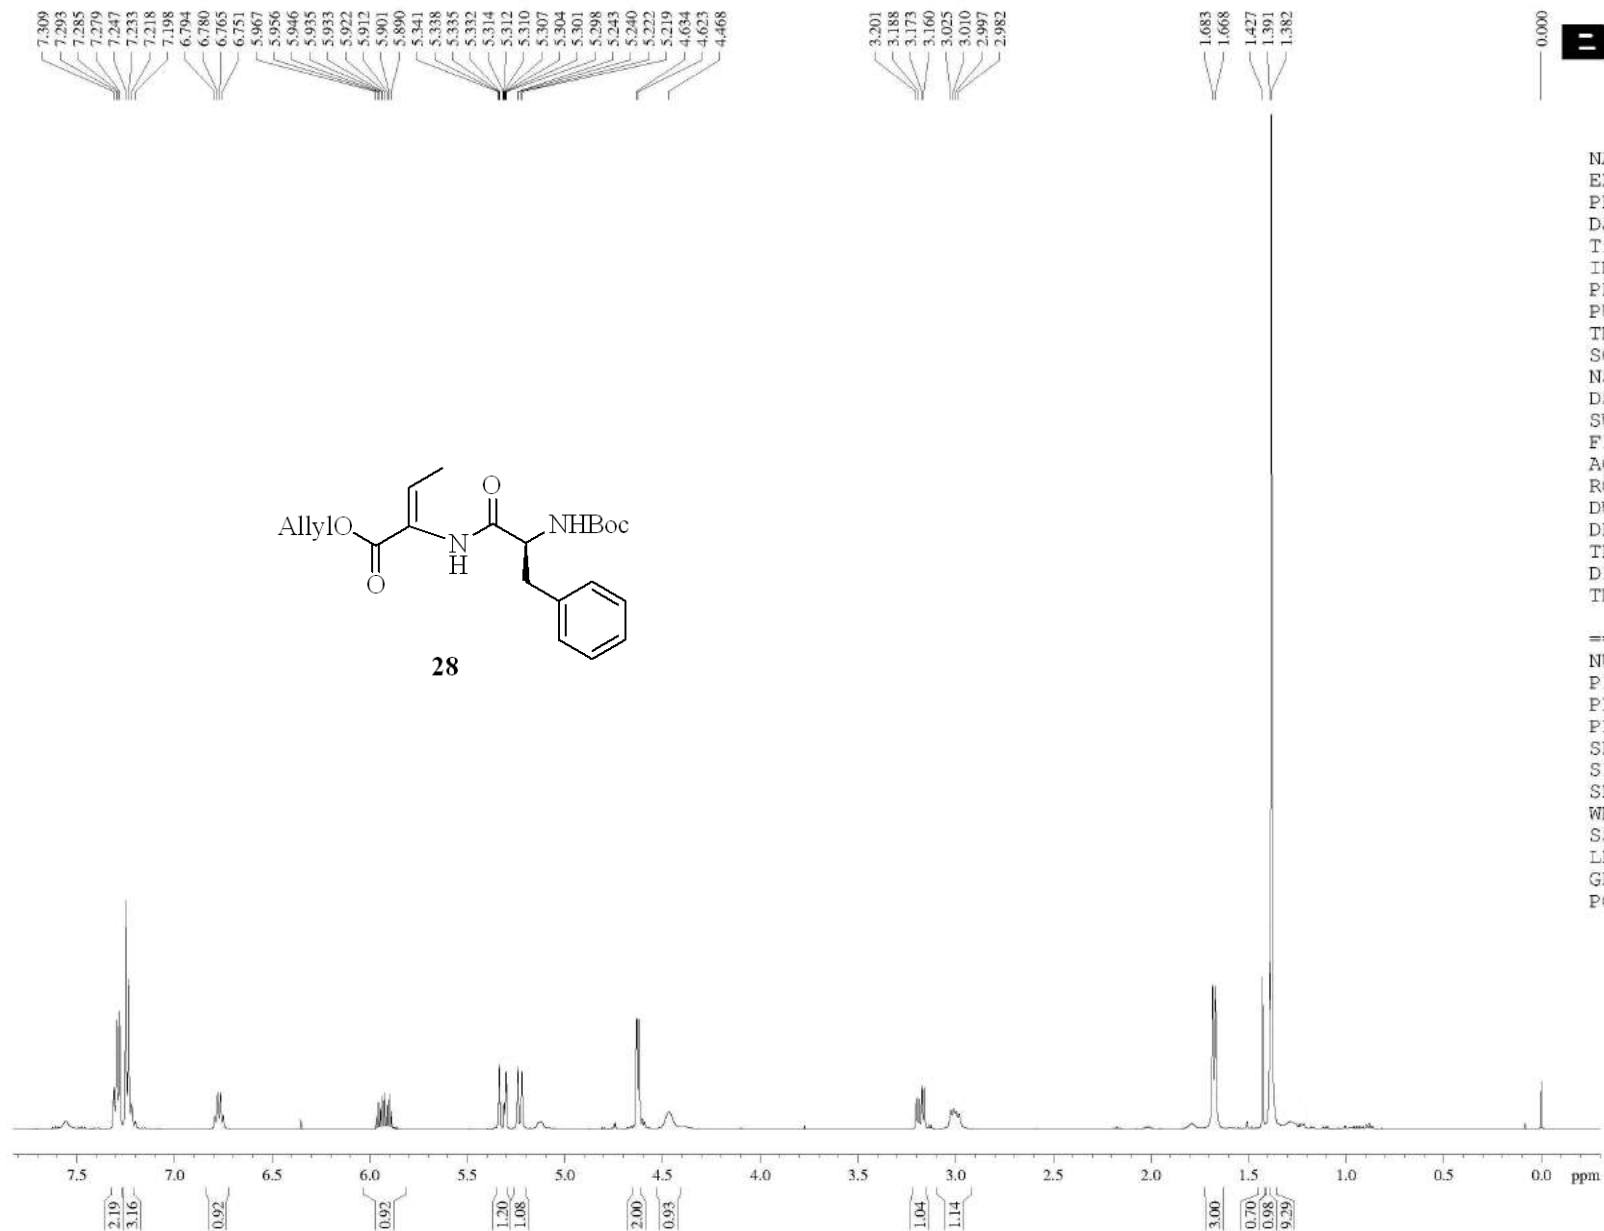

liushouxin-ertaituoshui

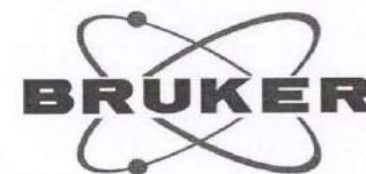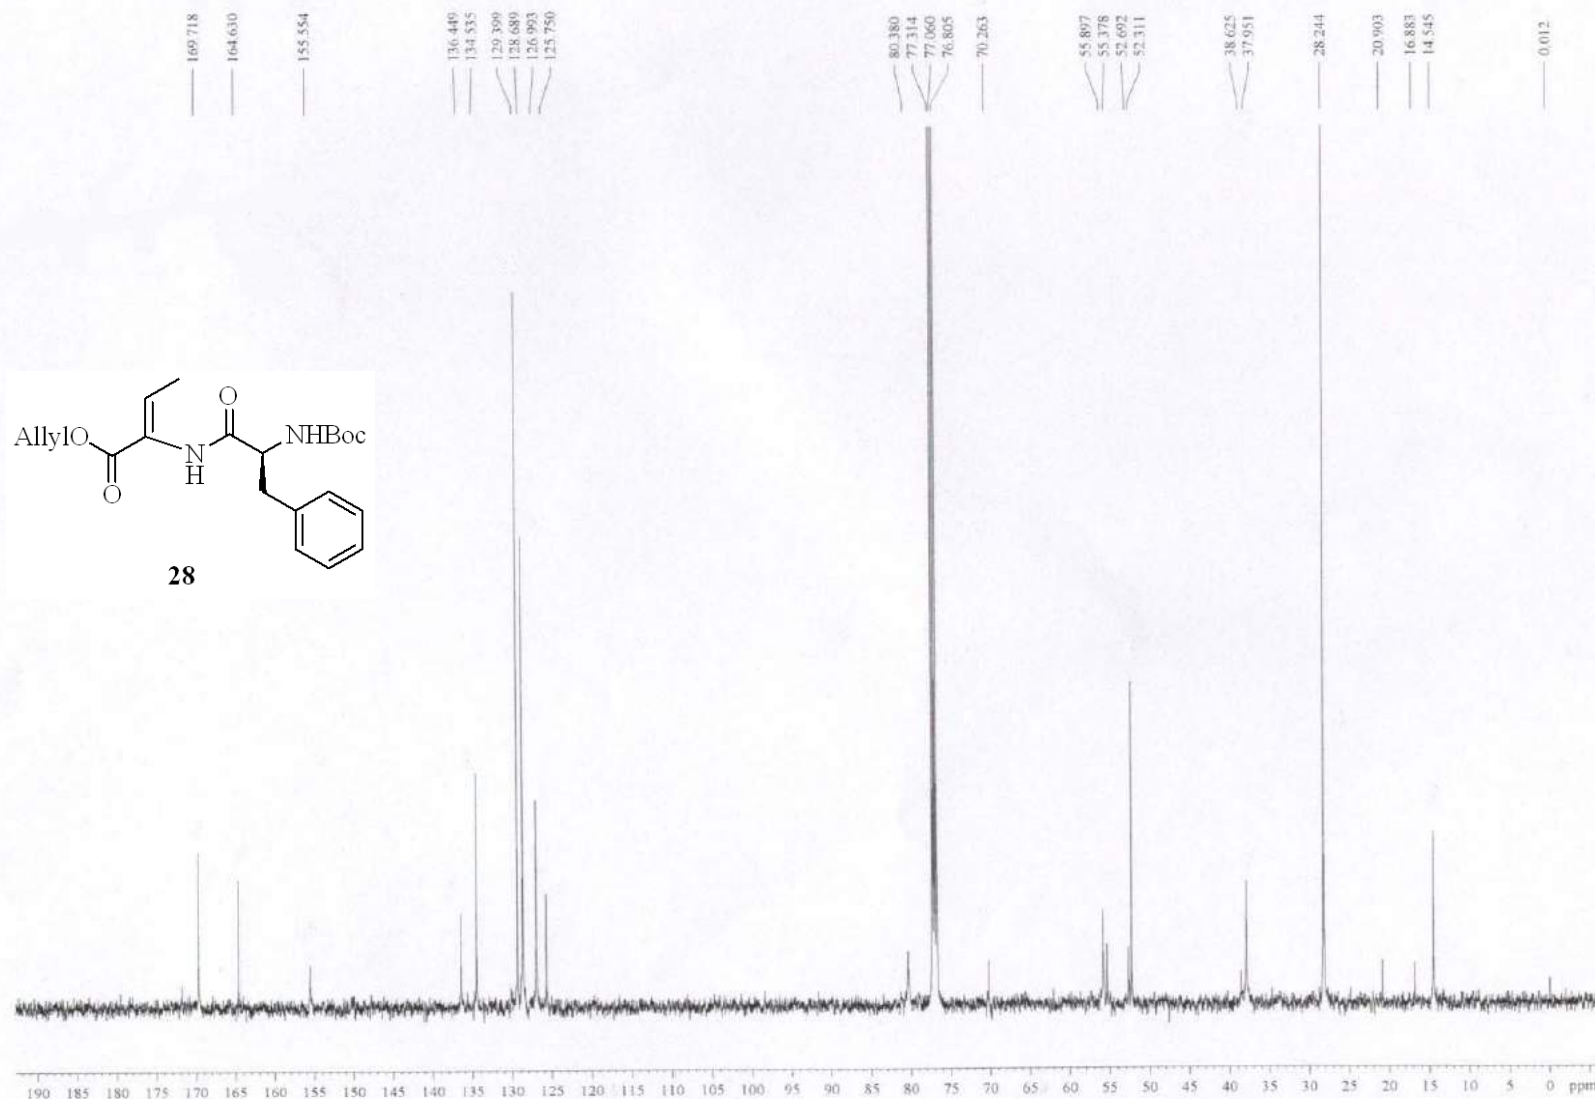

```

NAME      2013.04.18
EXPNO     21
PROCNO    1
Date_     20130418
Time      16.02
INSTRUM   spect
PROBHD    5 mm PABBO BB-
PULPROG   zgpg30
TD         16384
SOLVENT   CDC13
NS         450
DS         4
SWH       29761.904 Hz
FIDRES    1.816522 Hz
AQ         0.2753012 sec
RG         2050
DW         16.800 usec
DE         6.50 usec
TE         293.6 K
D1         2.00000000 sec
D11        0.03000000 sec
TD0        1
    
```

```

===== CHANNEL f1 =====
NUC1      13C
P1        12.30 usec
PL1       4.50 dB
PL1W      33.60015869 W
SFO1      125.7703643 MHz
    
```

```

===== CHANNEL f2 =====
CPDPRG2   waltz16
NUC2      1H
PCPD2     80.00 usec
PL2       2.00 dB
PL12      17.78 dB
PL13      17.78 dB
PL2W      16.79986763 W
PL12W     0.44392112 W
PL13W     0.44392112 W
SFO2      500.1320005 MHz
SI        32768
SF        125.7577890 MHz
WDW       EM
SSB       0
LB        3.00 Hz
GB        0
PC        1.40
    
```

liu shou xin Thr-His-H2O

7.83  
 7.28  
7.27  
7.25  
7.24  
7.20  
7.07  
 5.87  
5.86  
5.84  
5.83  
5.82  
5.81  
5.80  
5.79  
5.26  
5.22  
5.18  
5.16  
4.68  
4.67  
4.59

3.51  
3.49  
3.48  
3.46  
3.28  
3.25

1.68  
1.66  
1.52  
1.51  
1.41  
1.40  
1.39  
1.37  
1.35  
1.34

-0.00  
-0.07

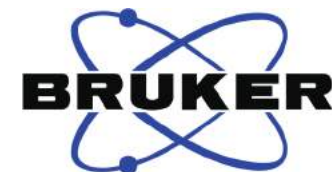

Current Data Parameters  
 NAME xuehong  
 EXPNO 20  
 PROCNO 1

F2 - Acquisition Parameters  
 Date\_ 20170802  
 Time 17.33  
 INSTRUM spect  
 PROBHD 5 mm PABBO BB-  
 PULPROG zg30  
 TD 65536  
 SOLVENT CDC13  
 NS 8  
 DS 0  
 SWH 10330.578 Hz  
 FIDRES 0.157632 Hz  
 AQ 3.1719425 sec  
 RG 181  
 DW 48.400 usec  
 DE 6.50 usec  
 TE 297.7 K  
 D1 1.00000000 sec  
 TD0 1

==== CHANNEL f1 =====  
 NUC1 1H  
 P1 13.00 usec  
 PL1 2.00 dB  
 PL1W 16.79986763 W  
 SFO1 500.1330885 MHz

F2 - Processing parameters  
 SI 32768  
 SF 500.1300451 MHz  
 WDW EM  
 SSB 0  
 LB 0.30 Hz  
 GB 0  
 PC 1.00

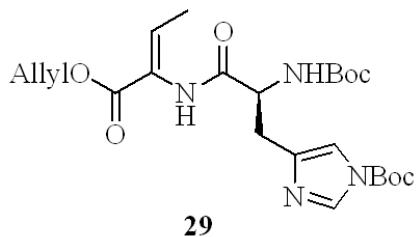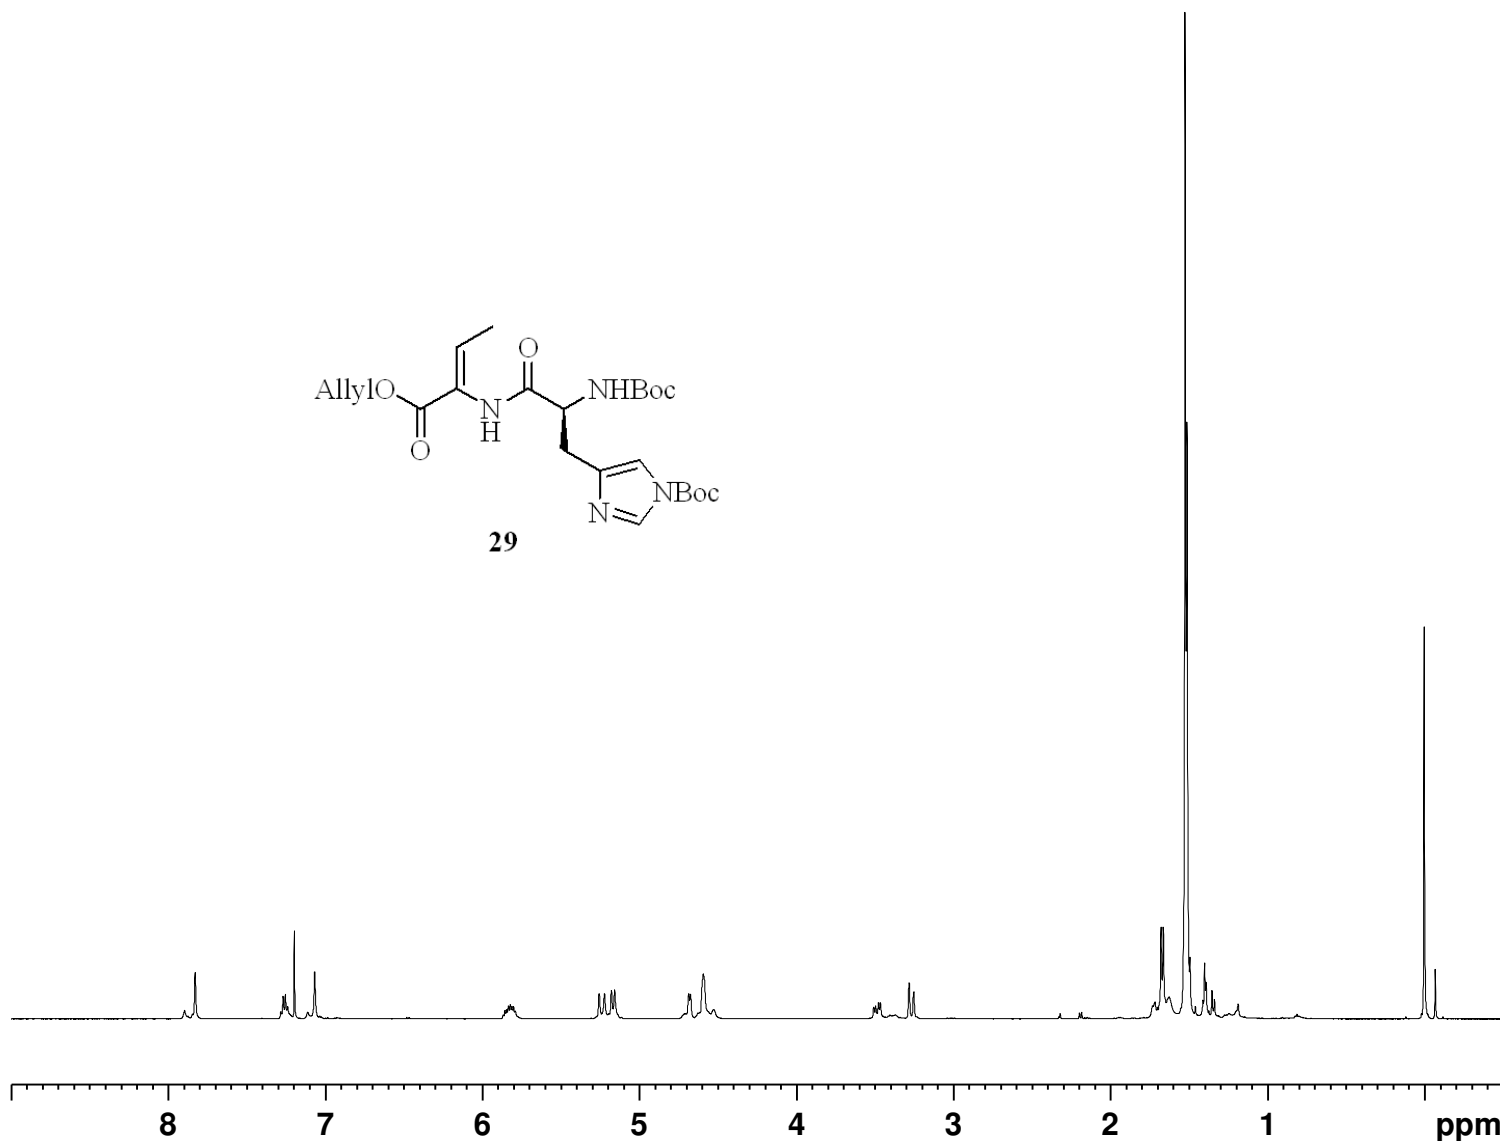

0.73  
0.86  
0.66  
0.80

1.00  
0.95  
1.02  
0.95  
2.07

0.99  
1.01

S71

3.25  
18.11  
1.89

liushouxin-Thr-L-His

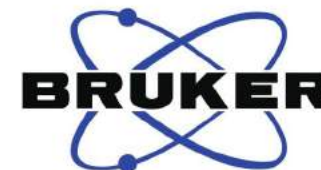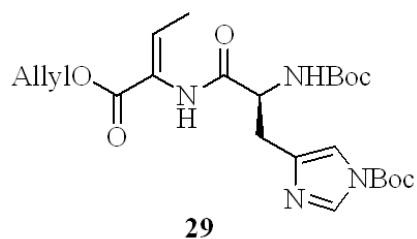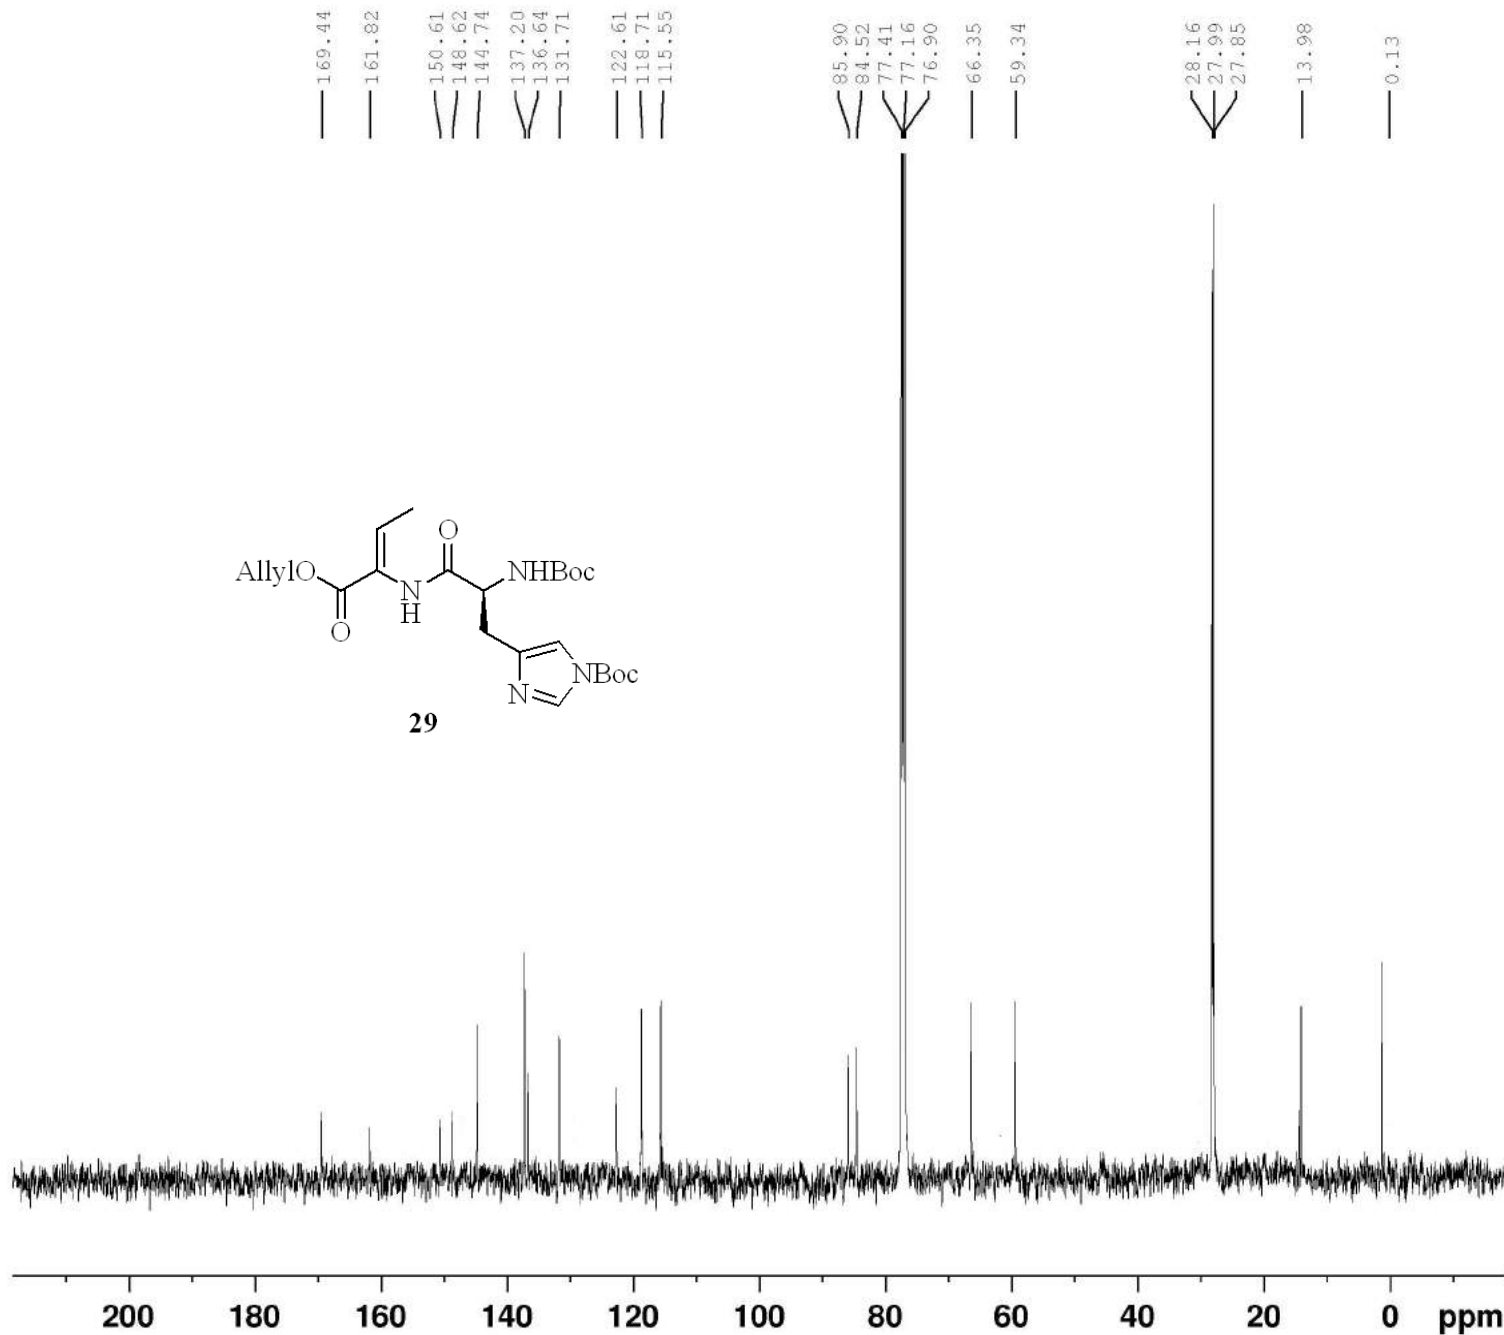

```

Current Data Parameters
NAME                xuehong
EXPNO                8
PROCNO              1

F2 - Acquisition Parameters
Date_                20211202
Time                 10.48
INSTRUM              spect
PROBHD               5 mm PABBO BB-
PULPROG              zgpg30
TD                   2048
SOLVENT              CDCl3
NS                   597
DS                   0
SWH                  29761.904 Hz
FIDRES               1.816522 Hz
AQ                   0.2752512 sec
RG                   2050
DW                   16.800 usec
DE                   6.50 usec
TE                   293.7 K
D1                   2.00000000 sec
D11                  0.03000000 sec
TD0                  1

===== CHANNEL f1 =====
NUC1                  13C
P1                    12.30 usec
PL1                   4.50 dB
PL1W                  33.60015869 W
SFO1                  125.7703643 MHz

===== CHANNEL f2 =====
CPDPRG[2]             waltz16
NUC2                   1H
PCPD2                 80.00 usec
PL2                   2.00 dB
PL12                  17.78 dB
PL13                  17.78 dB
PL2W                  16.79986763 W
PL12W                 0.44392112 W
PL13W                 0.44392112 W
SFO2                  500.1320005 MHz

F2 - Processing parameters
SI                    32768
SF                    125.7577739 MHz
WDW                   EM
SSE                   0
LB                    5.00 Hz
GB                   0
PC                    1.40
    
```

liu shou xin

Boc-Tyr-Thr-Allyl

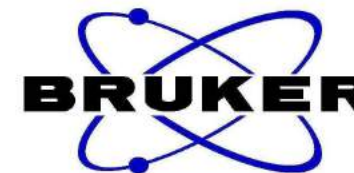

NAME 2012.07.25  
EXPNO 7  
PROCNO 1  
Date\_ 20120724  
Time 21.43  
INSTRUM spect  
PROBHD 5 mm PABBO BB-  
PULPROG zg30  
TD 65536  
SOLVENT CDCl3  
NS 1  
DS 2  
SWH 10330.578  
FIDRES 0.157632  
AQ 3.1719923  
RG 90.5  
DW 48.400  
DE 6.50  
TE 299.4  
D1 1.00000000  
TD0 1

===== CHANNEL f1 =====  
NUC1 1H  
P1 13.00  
PL1 2.00  
PL1W 16.79986763  
SFO1 500.1330885  
SI 32768  
SF 500.1300124  
WDW EM  
SSB 0  
LB 1.00  
GB 0  
PC 1.00

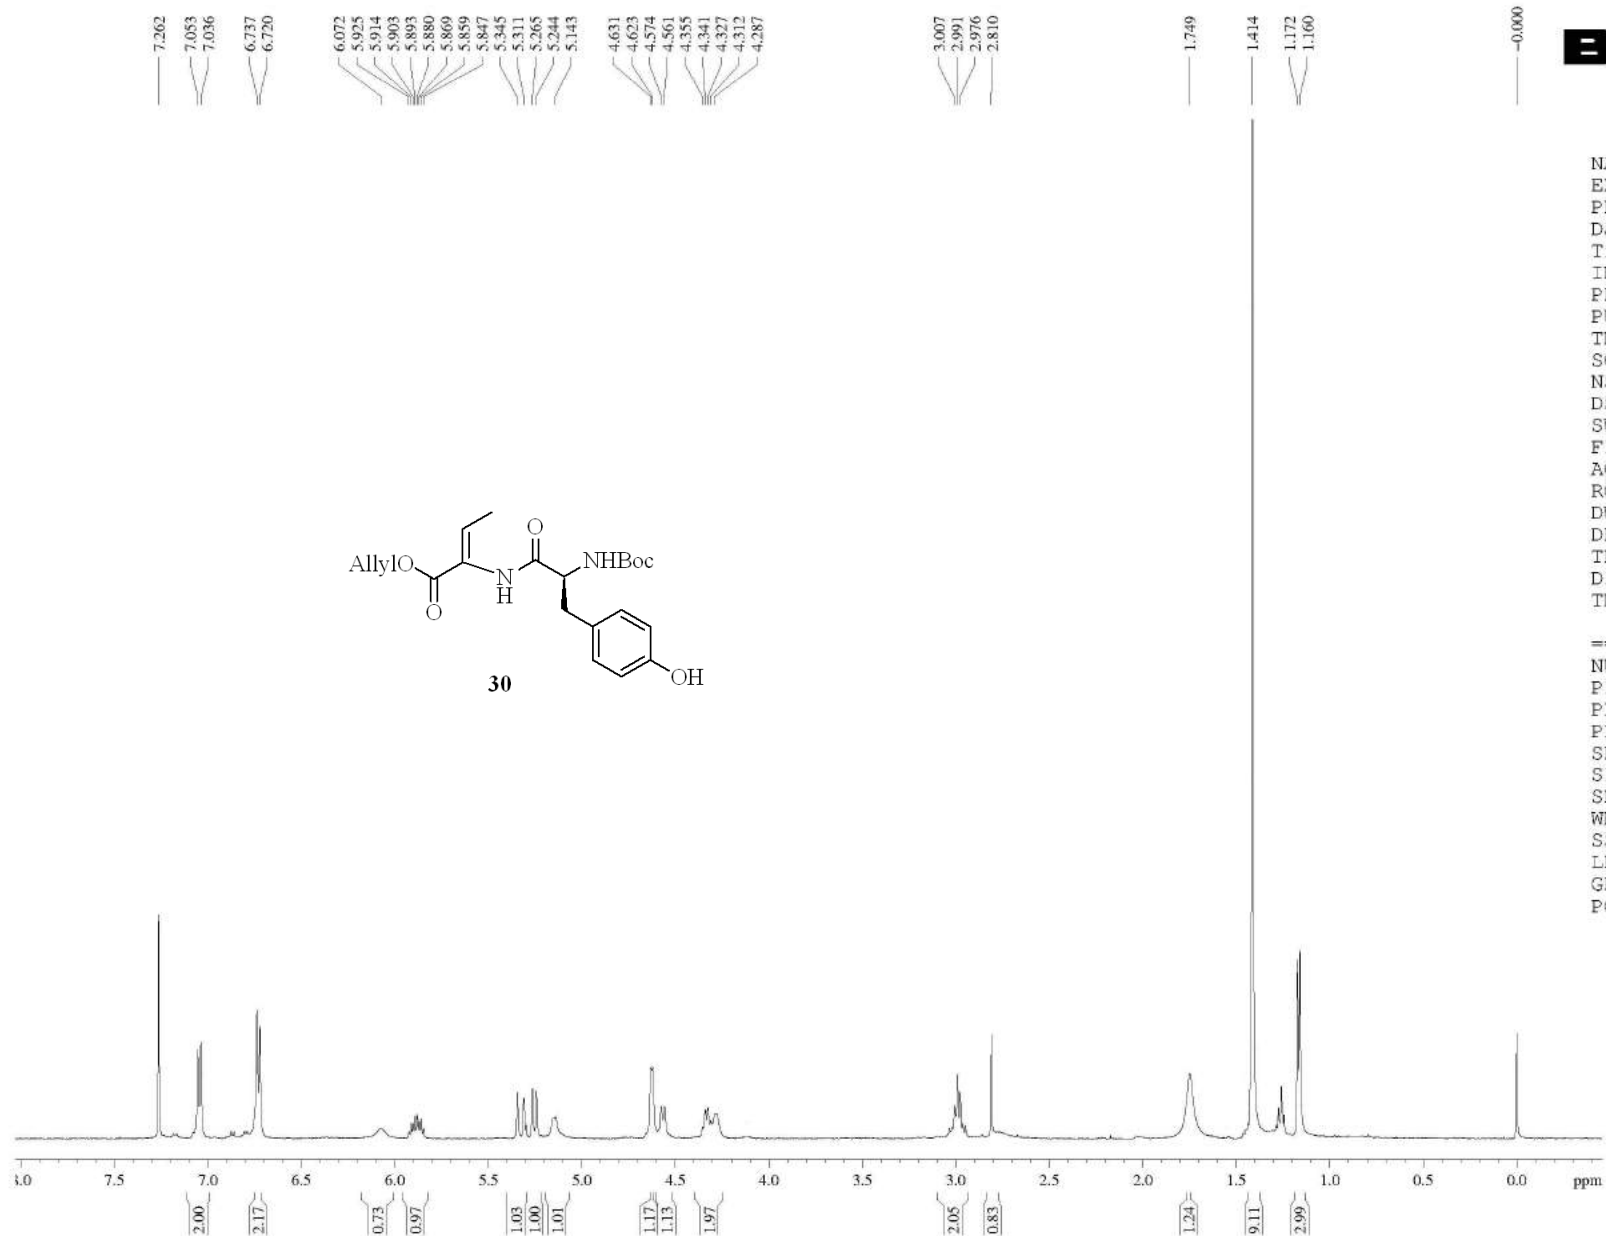

liushouxin-Thr-L-Tyr



169.71  
163.92  
151.95  
150.20  
134.85  
134.03  
131.96  
130.48  
125.88  
121.59  
118.65

83.69  
77.41  
77.16  
76.90  
66.03  
55.87  
37.24  
28.36  
27.81  
14.70

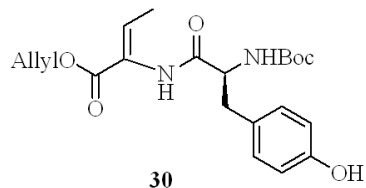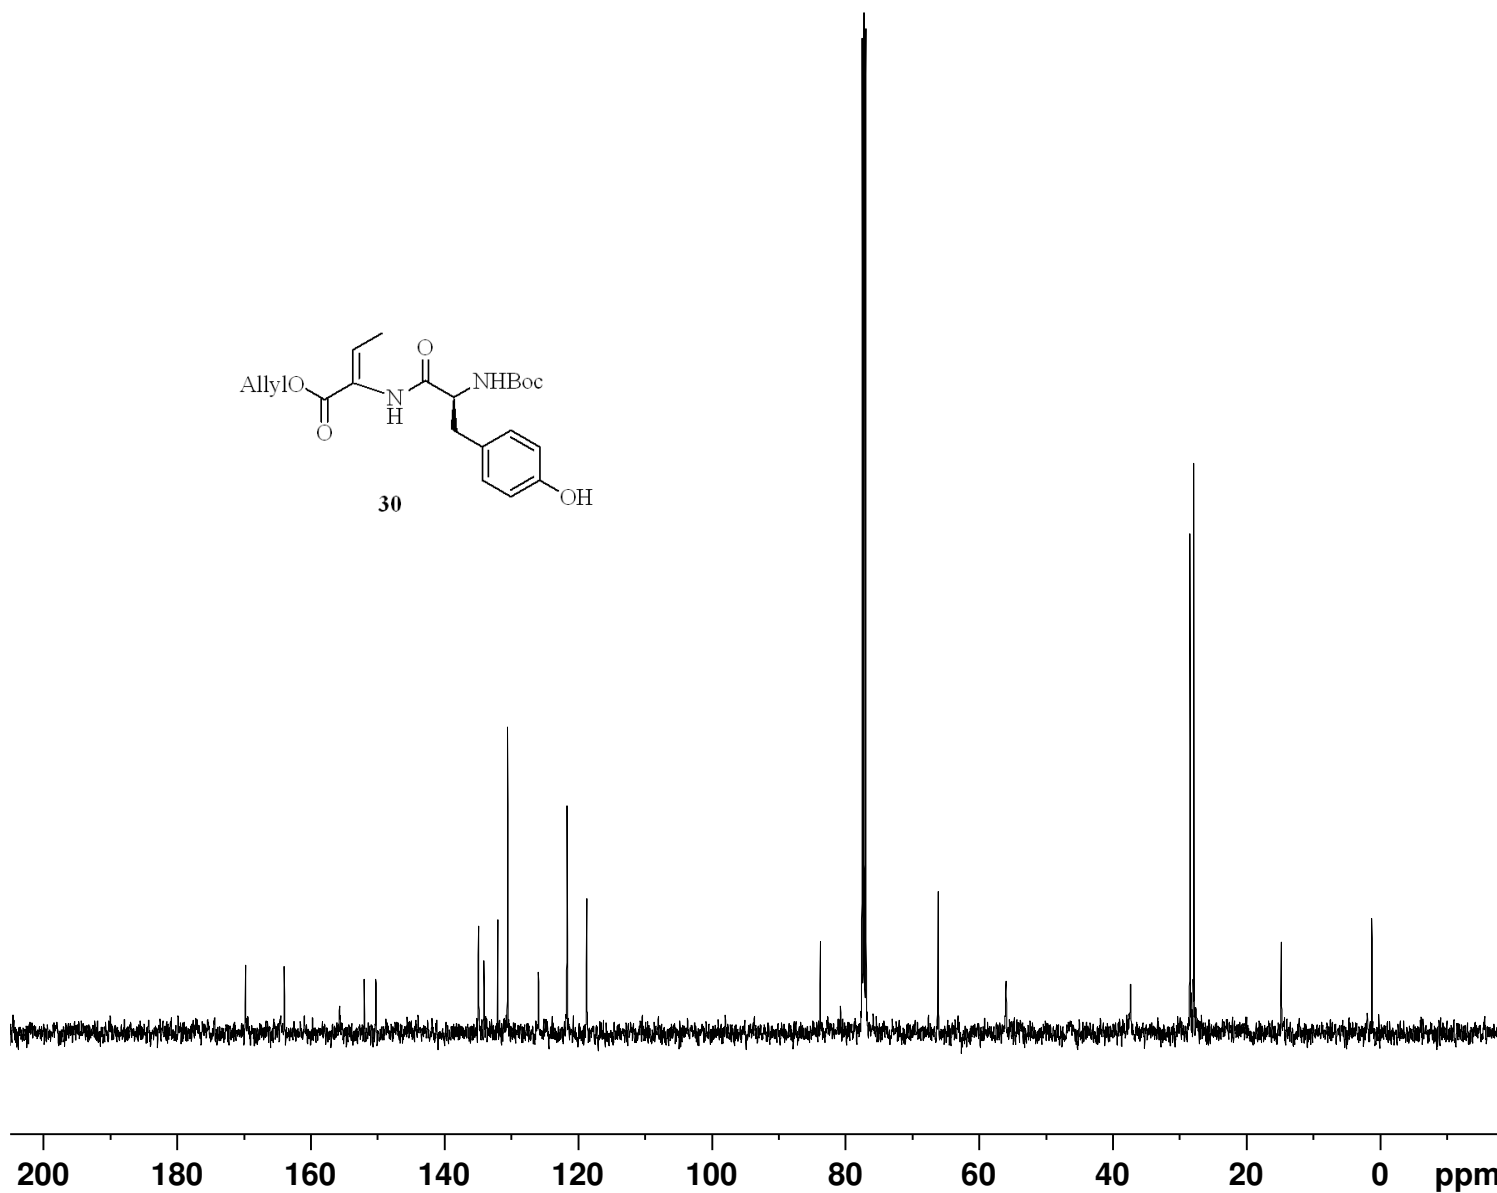

Current Data Parameters  
NAME xuehong  
EXPNO 4  
PROCNO 1

F2 - Acquisition Parameters

Date\_ 20211103  
Time 9.35  
INSTRUM spect  
PROBHD 5 mm PABBO BB-  
PULPROG zgpg30  
TD 2048  
SOLVENT CDC13  
NS 205  
DS 0  
SWH 29761.904 Hz  
FIDRES 3.633045 Hz  
AQ 0.1376256 sec  
RG 2050  
DW 16.800 usec  
DE 6.50 usec  
TE 293.6 K  
D1 2.00000000 sec  
D11 0.03000000 sec  
TD0 1

==== CHANNEL f1 =====  
NUC1 13C  
P1 12.30 usec  
PL1 4.50 dB  
PL1W 33.60015869 W  
SFO1 125.7703643 MHz

==== CHANNEL f2 =====  
CPDPRG[2] waltz16  
NUC2 1H  
PCPD2 80.00 usec  
PL2 2.00 dB  
PL12 17.78 dB  
PL13 17.78 dB  
PL2W 16.79986763 W  
PL12W 0.44392112 W  
PL13W 0.44392112 W  
SFO2 500.1320005 MHz

F2 - Processing parameters  
SI 32768  
SF 125.7577754 MHz  
WDW EM  
SSB 0  
LB 4.00 Hz  
GB 0  
PC 1.40

liu shou xin Thr-Pro

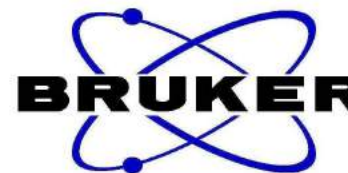

```

NAME      2012.08.06
EXPNO     5
PROCNO    1
Date_     20120806
Time      10.16
INSTRUM   spect
PROBHD    5 mm PABBO BB-
PULPROG   zg30
TD        65536
SOLVENT   CDCl3
NS         8
DS         2
SWH       10330.578
FIDRES    0.157632
AQ        3.1719923
RG         406
DW        48.400
DE         6.50
TE        298.8
D1        1.00000000
TD0       1
    
```

```

===== CHANNEL f1 =====
NUC1      1H
P1        13.00
PL1       2.00
PL1W     16.79986763
SFO1     500.1330885
SI        32768
SF        500.1300133
WDW       EM
SSB       0
LB        1.00
GB        0
PC        1.00
    
```

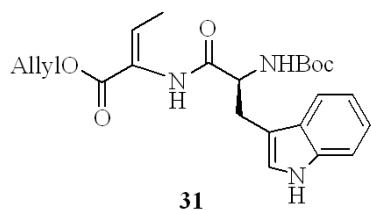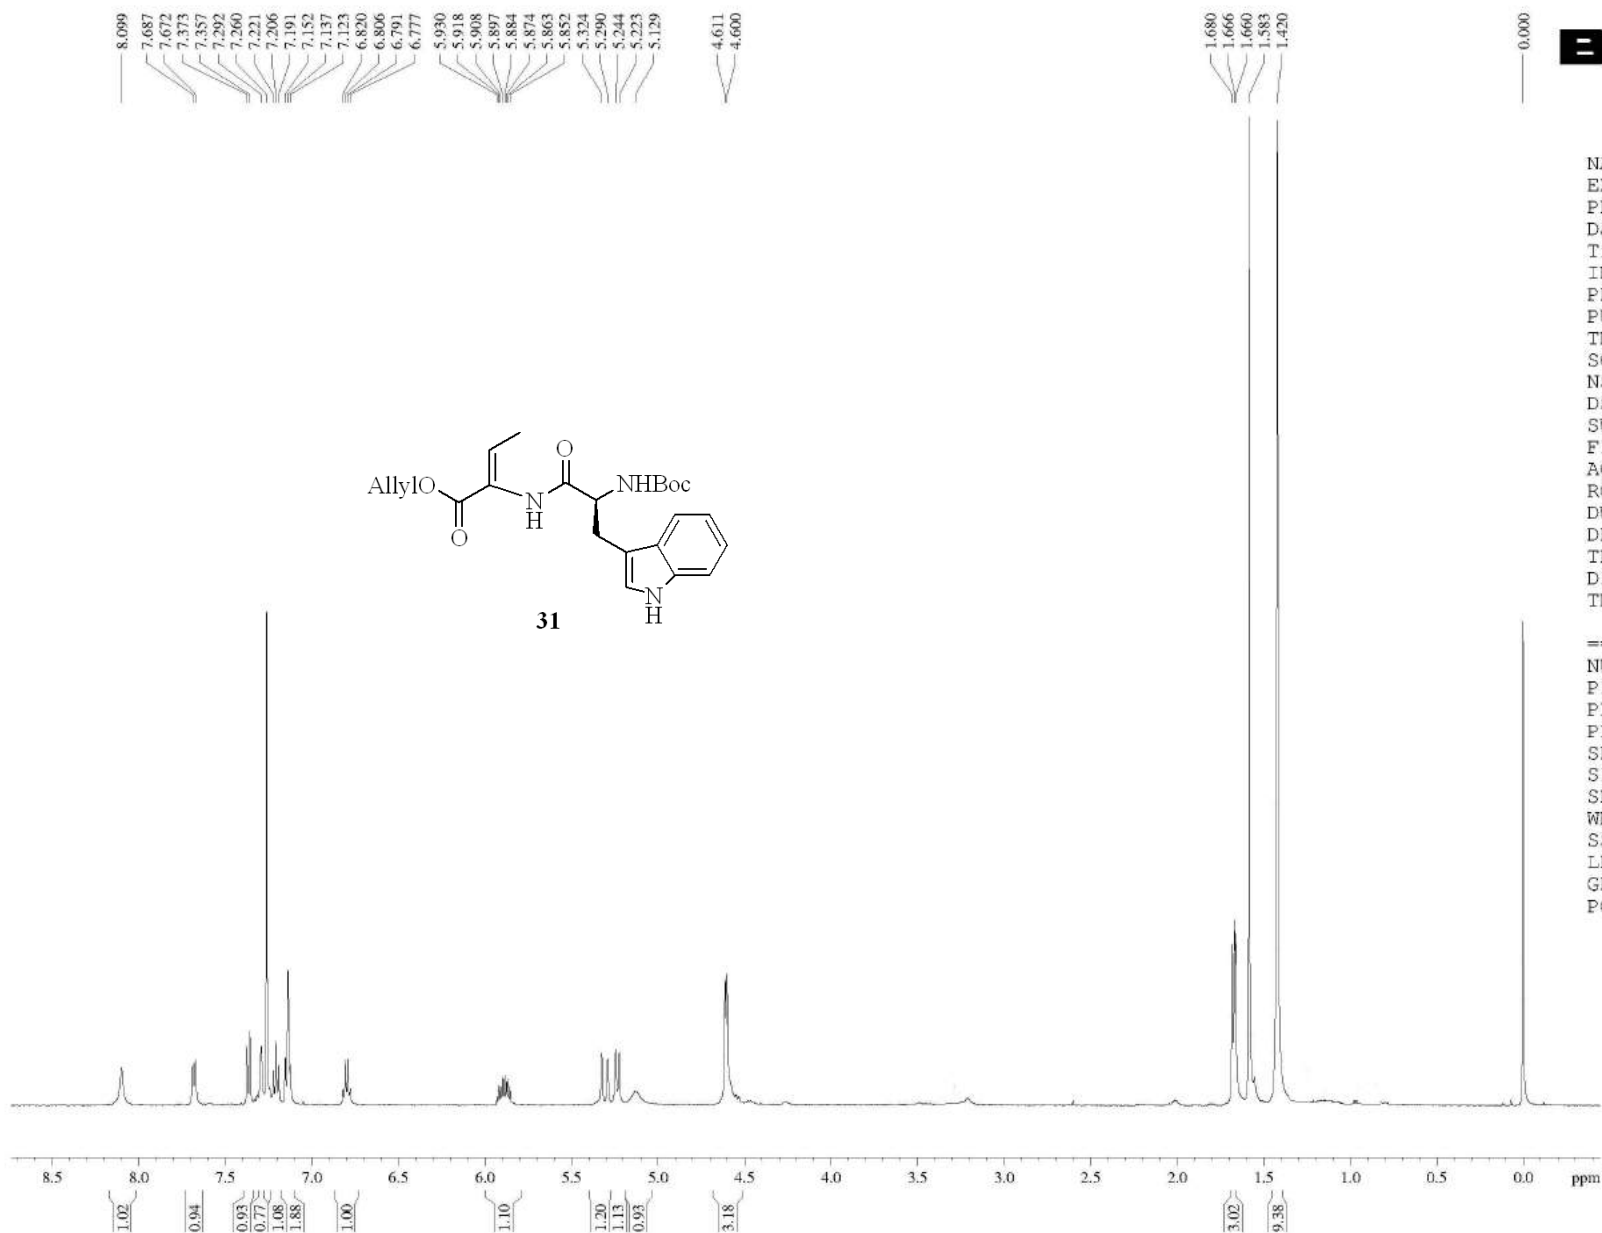



liushouxin--Thr-L-Trp

170.26  
170.14  
163.95  
136.34  
134.63  
132.01  
129.02  
127.67  
125.91  
123.50  
122.44  
119.96  
119.00  
118.59  
111.32

77.41  
77.16  
76.90  
65.99  
61.79  
55.44  
29.84  
28.40  
14.72  
0.14

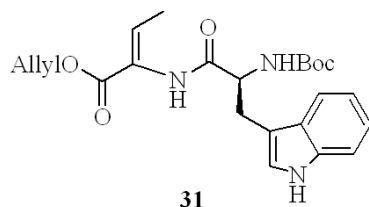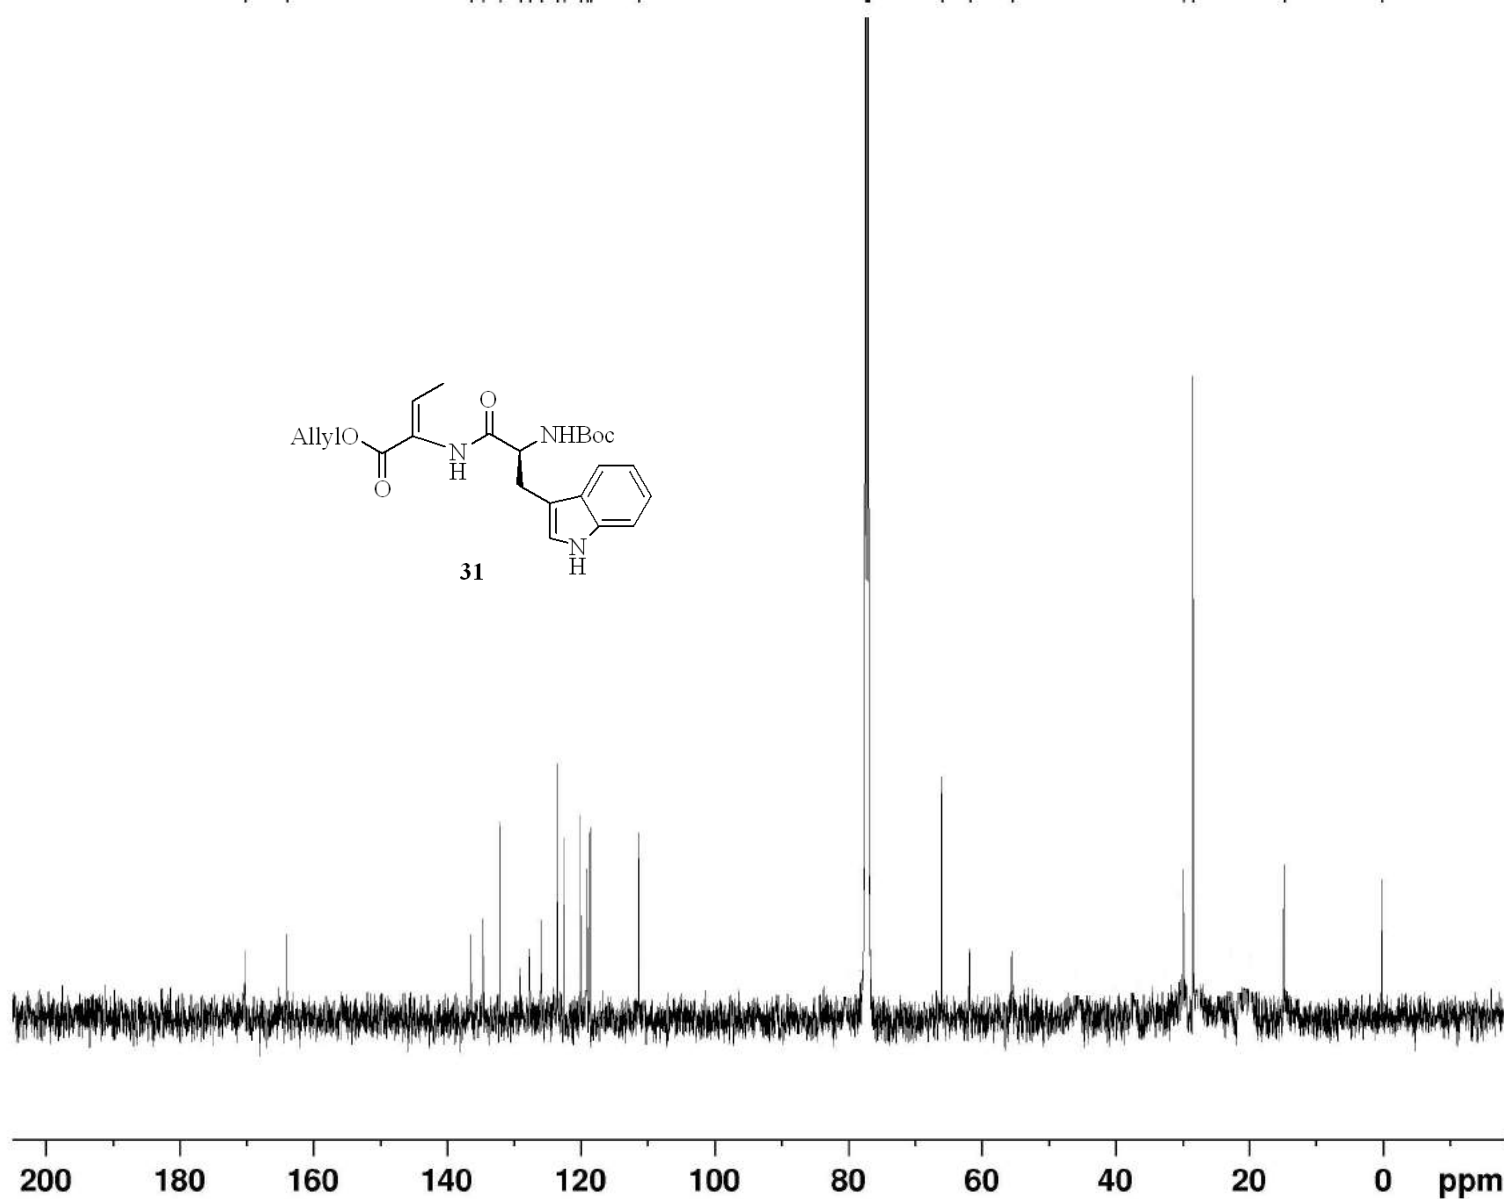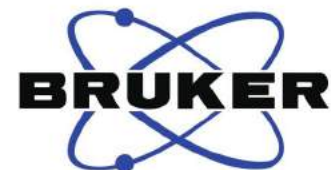

Current Data Parameters  
NAME xuehong  
EXPNO 9  
PROCNO 1

F2 - Acquisition Parameters  
Date\_ 20211202  
Time 14.29  
INSTRUM spect  
PROBHD 5 mm PABBO BB-  
PULPROG zgpg30  
TD 2048  
SOLVENT CDCl3  
NS 2048  
DS 0  
SWH 29761.904 Hz  
FIDRES 1.816522 Hz  
AQ 0.2752512 sec  
RG 2050  
DW 16.800 usec  
DE 6.50 usec  
TE 293.9 K  
D1 2.00000000 sec  
D11 0.03000000 sec  
TD0 1

===== CHANNEL f1 =====  
NUC1 13C  
P1 12.30 usec  
PL1 4.50 dB  
PL1W 33.60015869 W  
SFO1 125.7703643 MHz

===== CHANNEL f2 =====  
CPDPRG12 waltz16  
NUC2 1H  
PCPD2 80.00 usec  
PL2 2.00 dB  
PL12 17.78 dB  
PL13 17.78 dB  
PL2W 16.79986763 W  
PL12W 0.44392112 W  
PL13W 0.44392112 W  
SFO2 500.1320005 MHz

F2 - Processing parameters  
SI 32768  
SF 125.7577734 MHz  
WDW EM  
SSE 0  
LB 3.00 Hz  
GB 0  
PC 1.40



liu shou xin Thr-D-Nap-H2O1

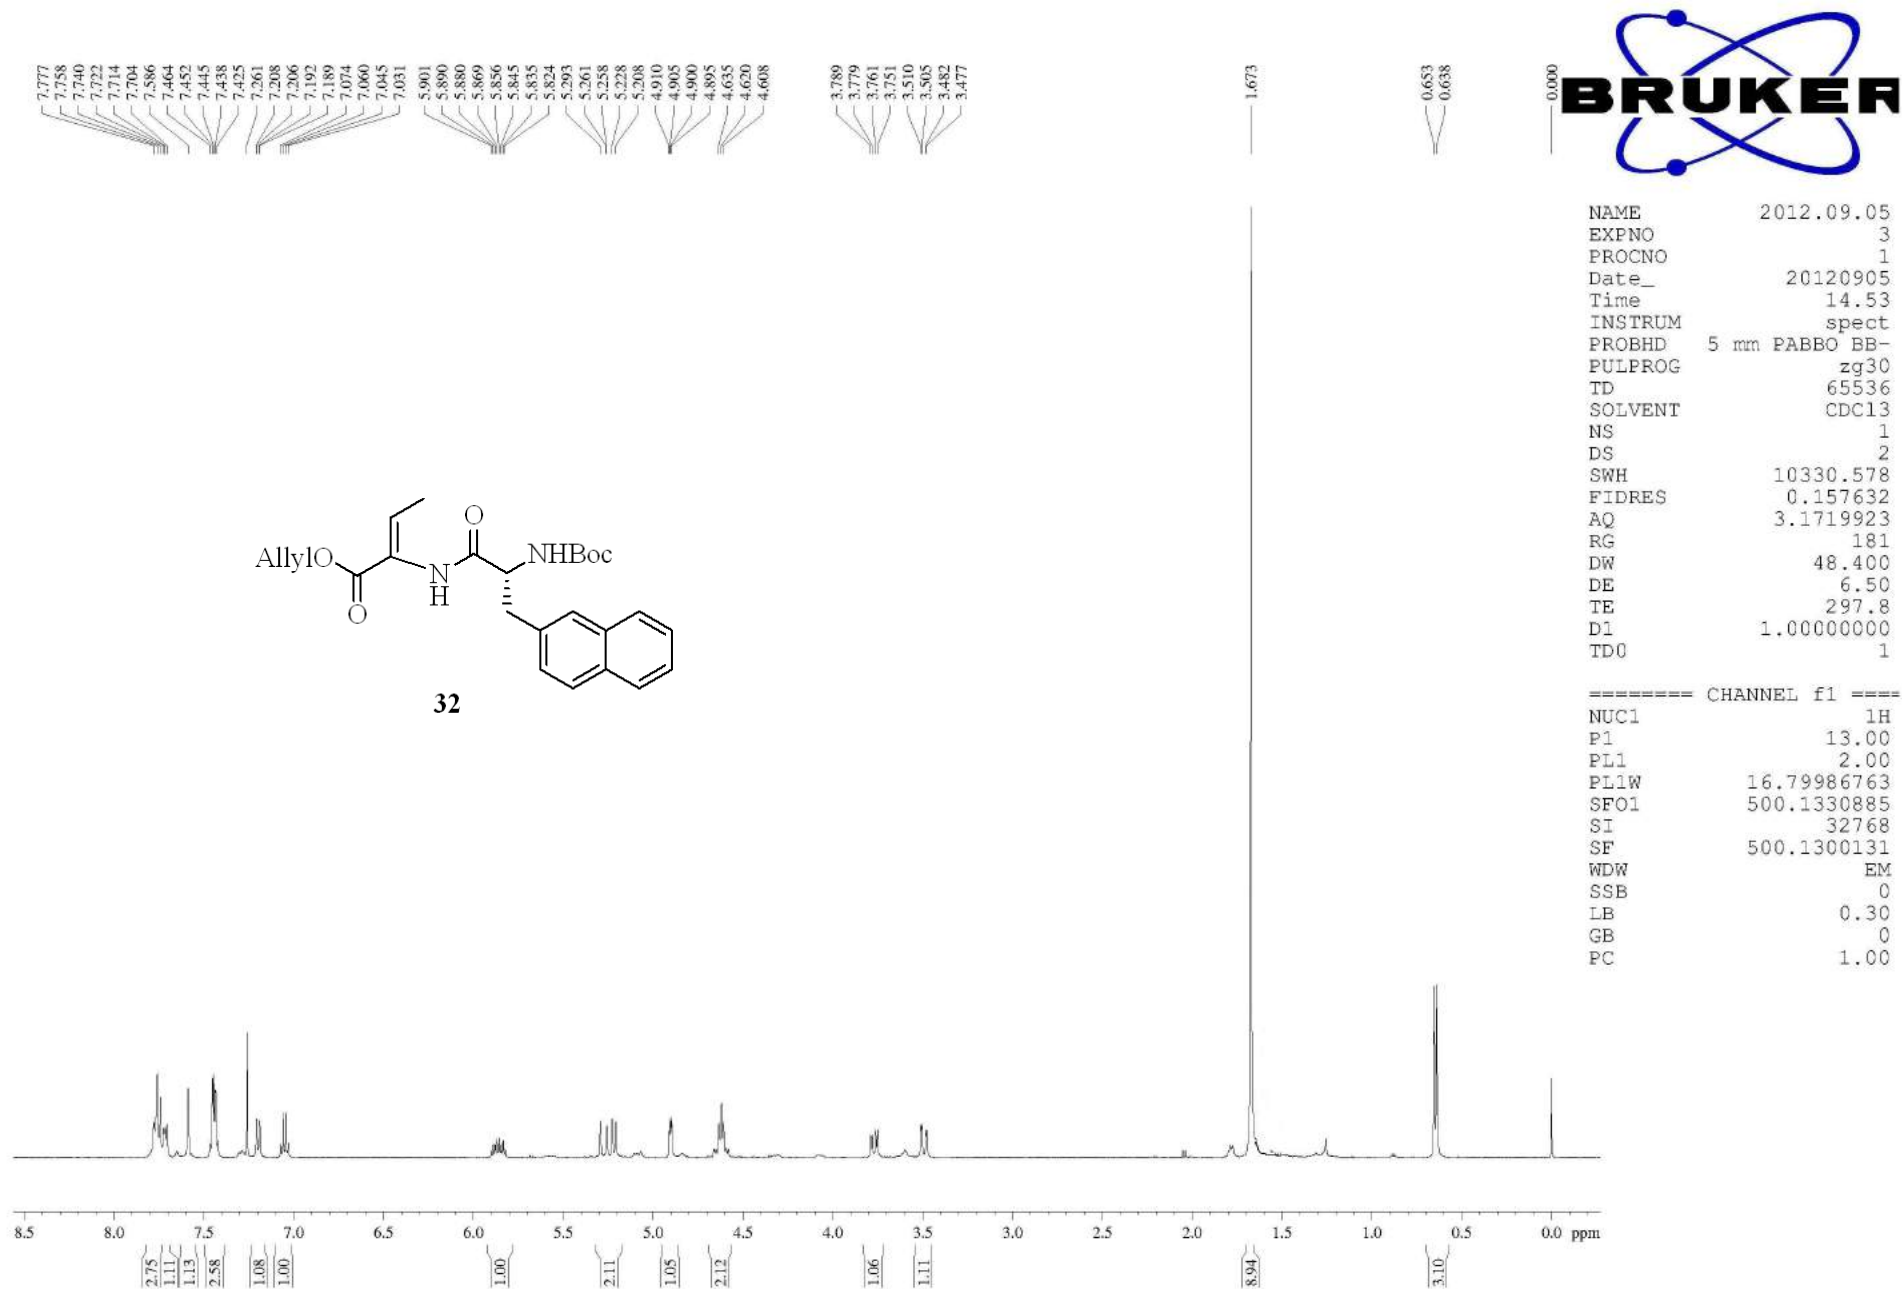

liushouxin-Thr-D-Nap



171.28  
169.08  
161.54  
149.97  
148.87  
144.53  
133.51  
132.78  
131.60  
131.06  
129.25  
128.64  
127.82  
127.73  
127.66  
126.48  
126.21  
122.20  
118.73

84.88  
77.41  
77.16  
76.90  
66.31  
61.02  
60.52  
34.97  
28.24  
21.18  
14.31  
13.07

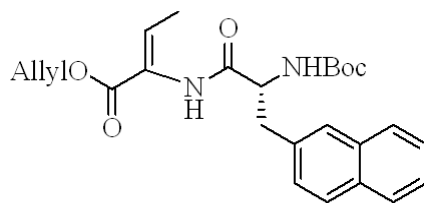

32

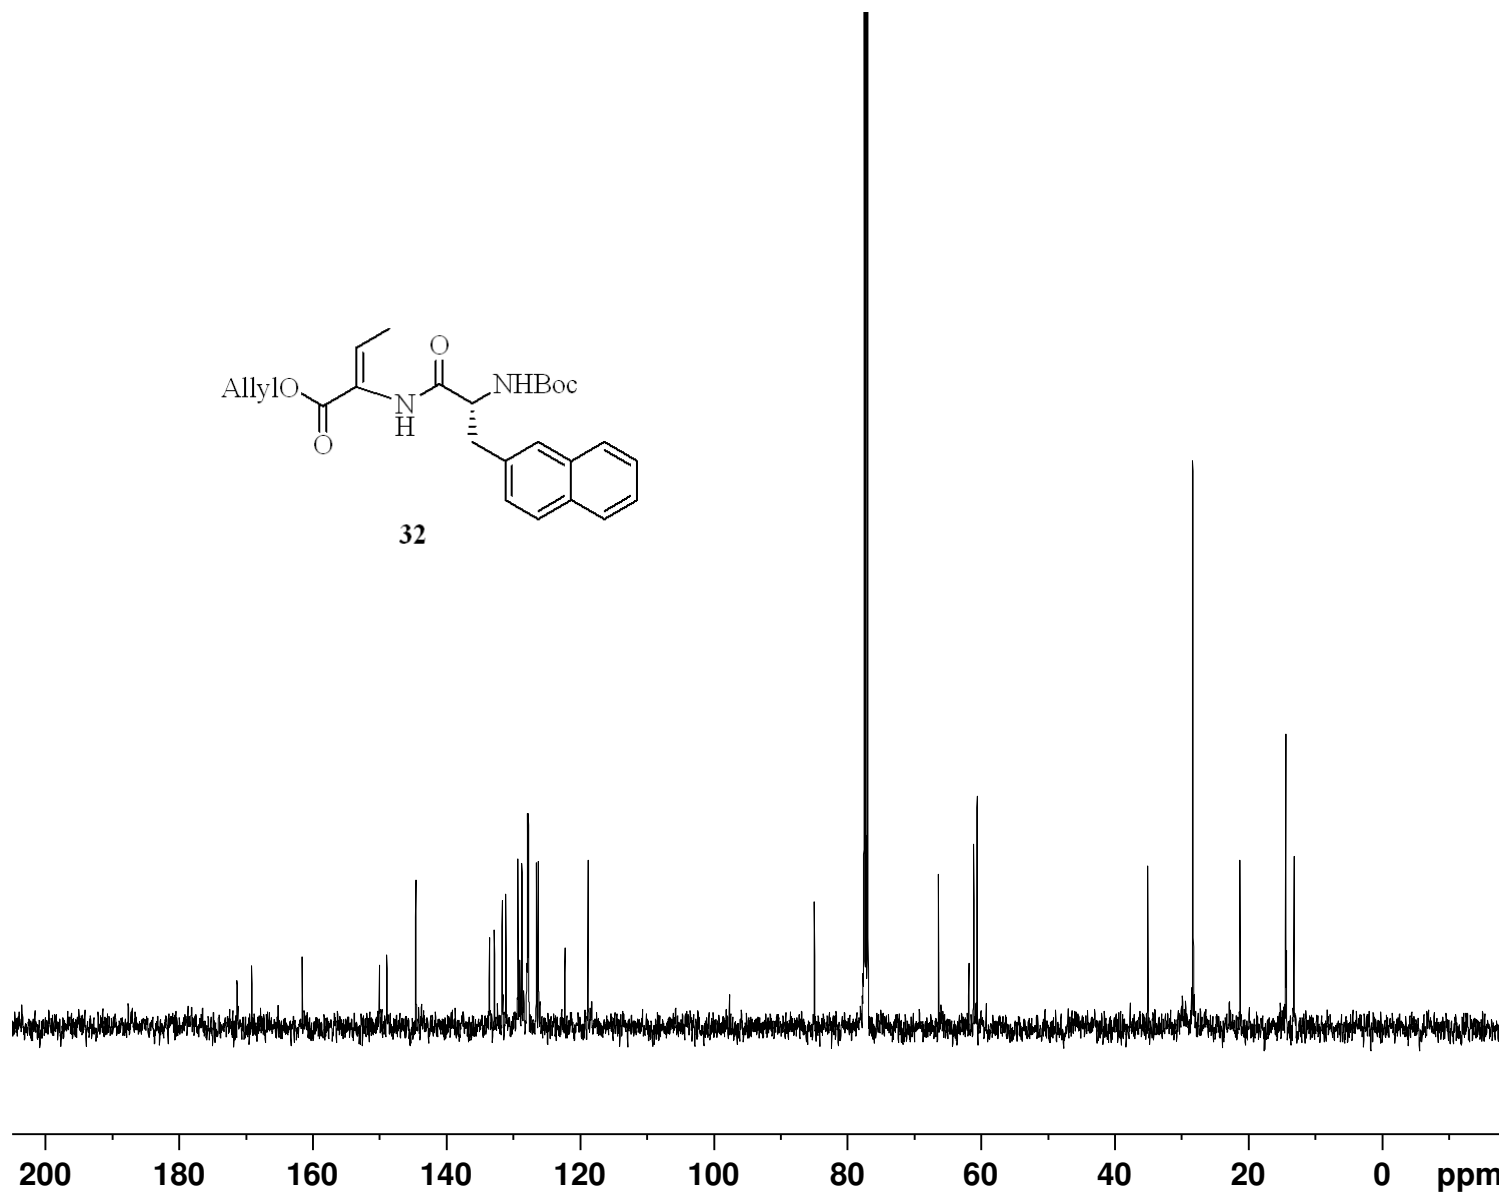

Current Data Parameters  
NAME xuehong  
EXPNO 3  
PROCNO 1

F2 - Acquisition Parameters  
Date\_ 20211103  
Time 9.06  
INSTRUM spect  
PROBHD 5 mm PABBO BB-  
PULPROG zgpg30  
TD 4096  
SOLVENT CDC13  
NS 153  
DS 0  
SWH 29761.904 Hz  
FIDRES 3.633045 Hz  
AQ 0.1376256 sec  
RG 2050  
DW 16.800 usec  
DE 6.50 usec  
TE 293.9 K  
D1 2.00000000 sec  
D11 0.03000000 sec  
TD0 1

==== CHANNEL f1 =====  
NUC1 13C  
P1 12.30 usec  
PL1 4.50 dB  
PL1W 33.60015869 W  
SFO1 125.7703643 MHz

==== CHANNEL f2 =====  
CPDPRG[2] waltz16  
NUC2 1H  
PCPD2 80.00 usec  
PL2 2.00 dB  
PL12 17.78 dB  
PL13 17.78 dB  
PL2W 16.79986763 W  
PL12W 0.44392112 W  
PL13W 0.44392112 W  
SFO2 500.1320005 MHz

F2 - Processing parameters  
SI 32768  
SF 125.7577763 MHz  
WDW EM  
SSB 0  
LB 4.00 Hz  
GB 0  
PC 1.40

liushouxin-2018.6.11-ZY



NAME 2018.06.14  
EXPNO 12  
PROCNO 1  
Date\_ 20180614  
Time 20.44  
INSTRUM spect  
PROBHD 5 mm PADUL 13C  
PULPROG zg30  
TD 65536  
SOLVENT CDCl3  
NS 8  
DS 0  
SWH 10330.578  
FIDRES 0.157632  
AQ 3.1719923  
RG 14.2  
DW 48.400  
DE 6.50  
TE 297.7  
D1 1.00000000  
TD0 1

===== CHANNEL f1 =====  
NUC1 1H  
P1 13.50  
PL1 2.00  
PL1W 16.79986763  
SFO1 500.1330885  
SI 32768  
SF 500.1300063  
WDW EM  
SSB 0  
LB 1.00  
GB 0  
PC 1.00

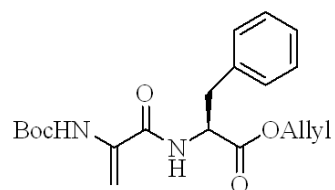

33

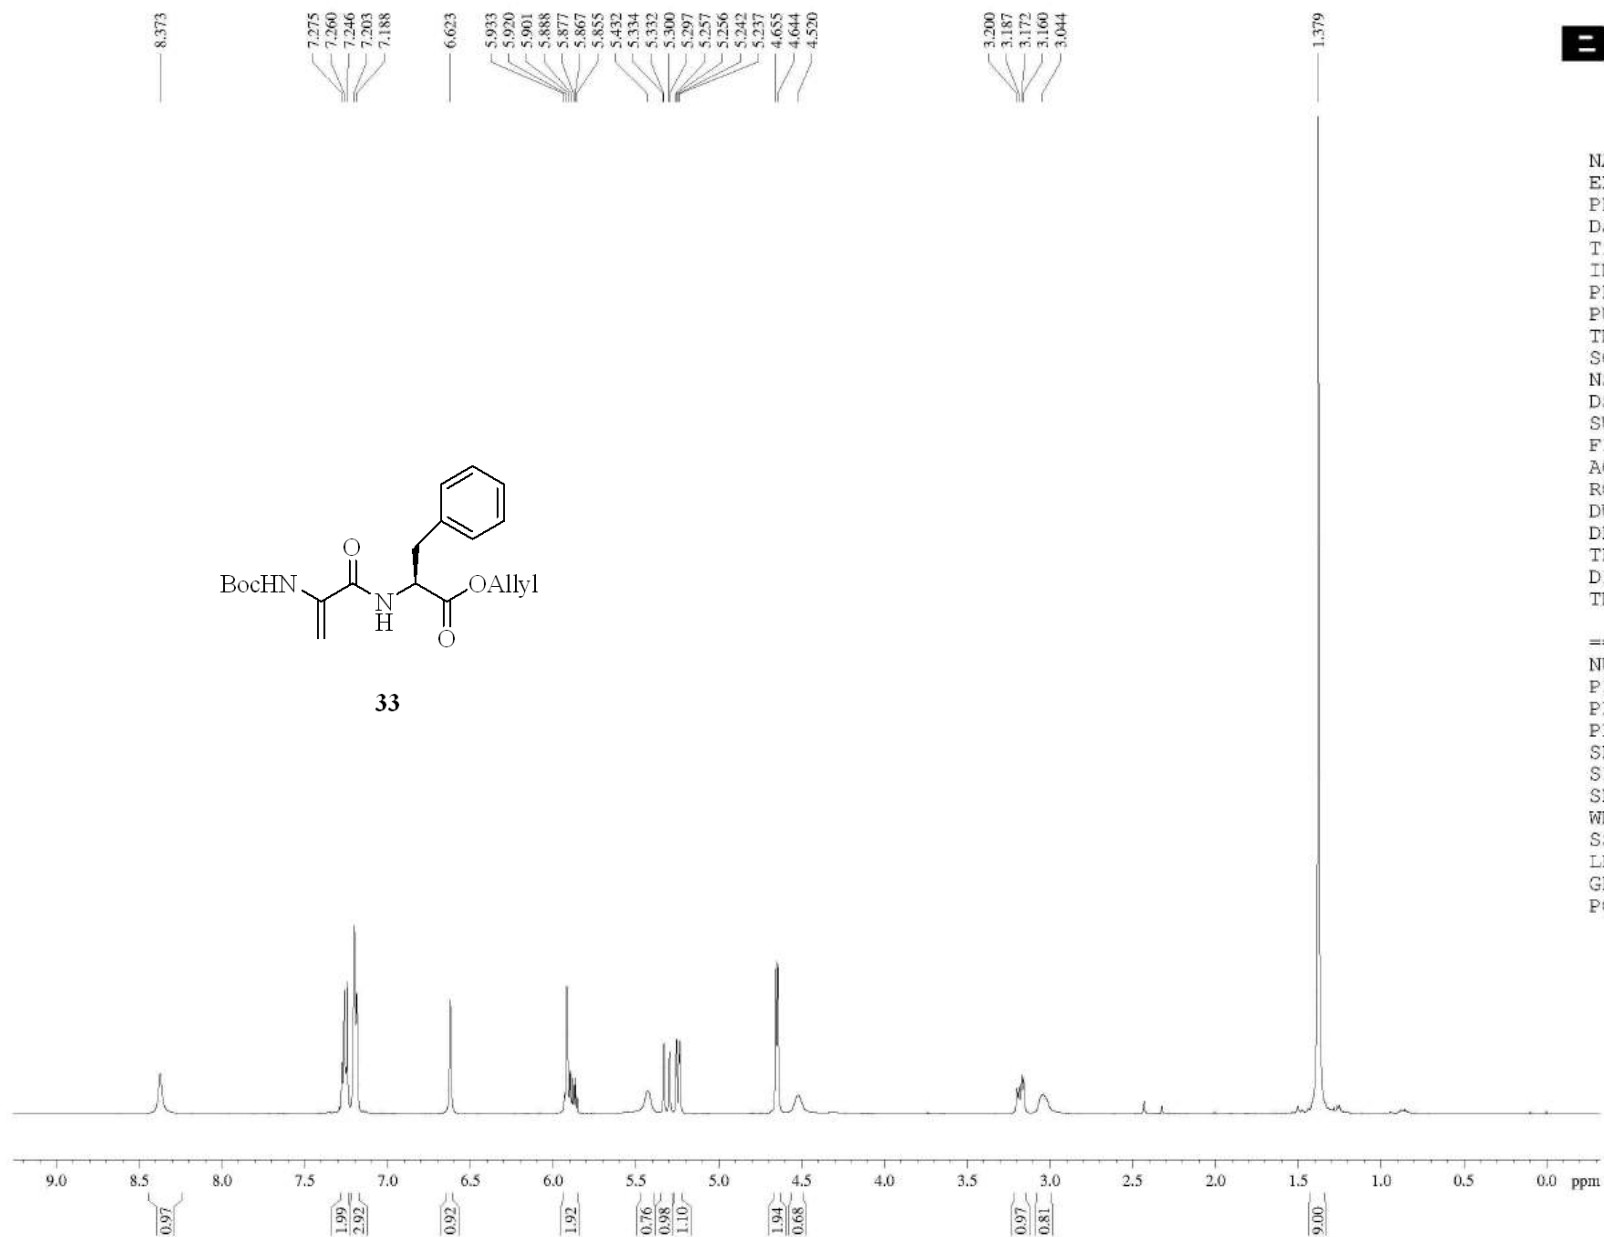

liushouxin-2018-6-11-zy

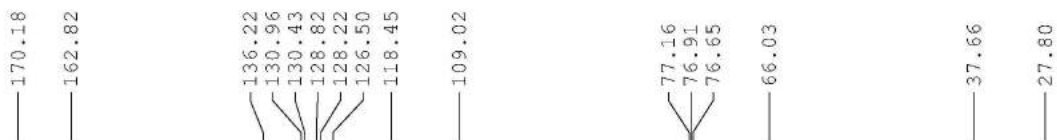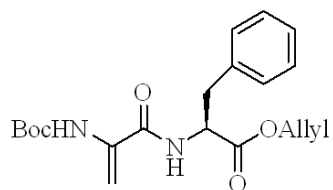

33

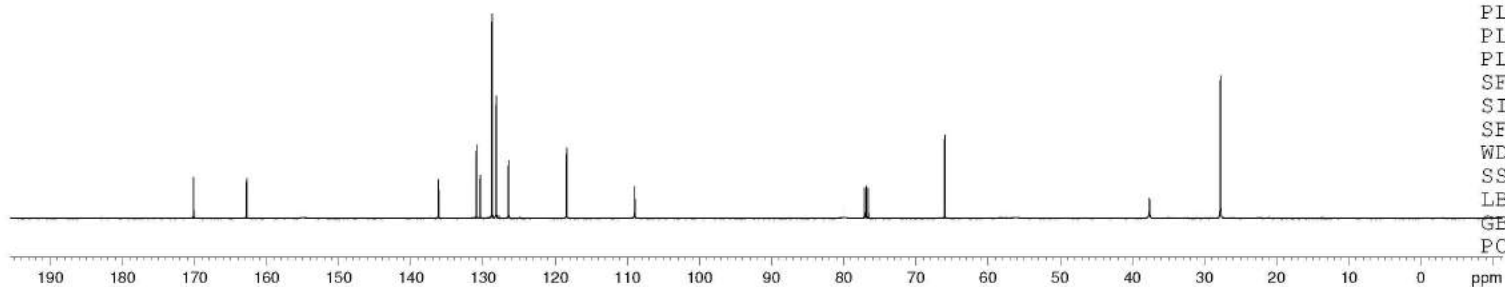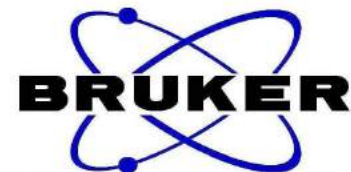

NAME 2018.06.23  
EXPNO 10  
PROCNO 1  
Date\_ 20180623  
Time 16.51  
INSTRUM spect  
PROBHD 5 mm PADUL 13C  
PULPROG zgpg30  
TD 32768  
SOLVENT CDC13  
NS 512  
DS 0  
SWH 29761.904 Hz  
FIDRES 0.908261 Hz  
AQ 0.5505524 sec  
RG 2050  
DW 16.800 usec  
DE 6.50 usec  
TE 299.7 K  
D1 2.00000000 sec  
D11 0.03000000 sec  
TD0 1

===== CHANNEL f1 =====  
NUC1 13C  
P1 12.00 usec  
PL1 4.50 dB  
PL1W 33.60015869 W  
SFO1 125.7703643 MHz

===== CHANNEL f2 =====  
CPDPRG2 waltz16  
NUC2 1H  
PCPD2 80.00 usec  
PL2 2.00 dB  
PL12 17.46 dB  
PL13 17.46 dB  
PL2W 16.79986763 W  
PL12W 0.47786582 W  
PL13W 0.47786582 W  
SFO2 500.1320005 MHz  
SI 32768  
SF 125.7578395 MHz  
WDW EM  
SSB 0  
LB 1.00 Hz  
GB 0  
PC 1.40

liushouxin-2018-5-26-ZY-3



NAME 2018.05.30  
EXPNO 21  
PROCNO 1  
Date\_ 20180530  
Time 12.29  
INSTRUM spect  
PROBHD 5 mm PADUL 13C  
PULPROG zg30  
TD 65536  
SOLVENT CDC13  
NS 16  
DS 0  
SWH 10330.578  
FIDRES 0.157632  
AQ 3.1719923  
RG 45.2  
DW 48.400  
DE 6.50  
TE 297.8  
D1 1.00000000  
TD0 1

===== CHANNEL f1 =====  
NUC1 1H  
P1 13.50  
PL1 2.00  
PL1W 16.79986763  
SFO1 500.1330885  
SI 32768  
SF 500.1300115  
WDW EM  
SSB 0  
LB 1.00  
GB 0  
PC 1.00

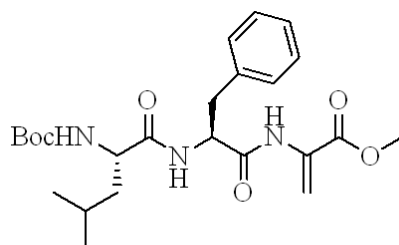

34

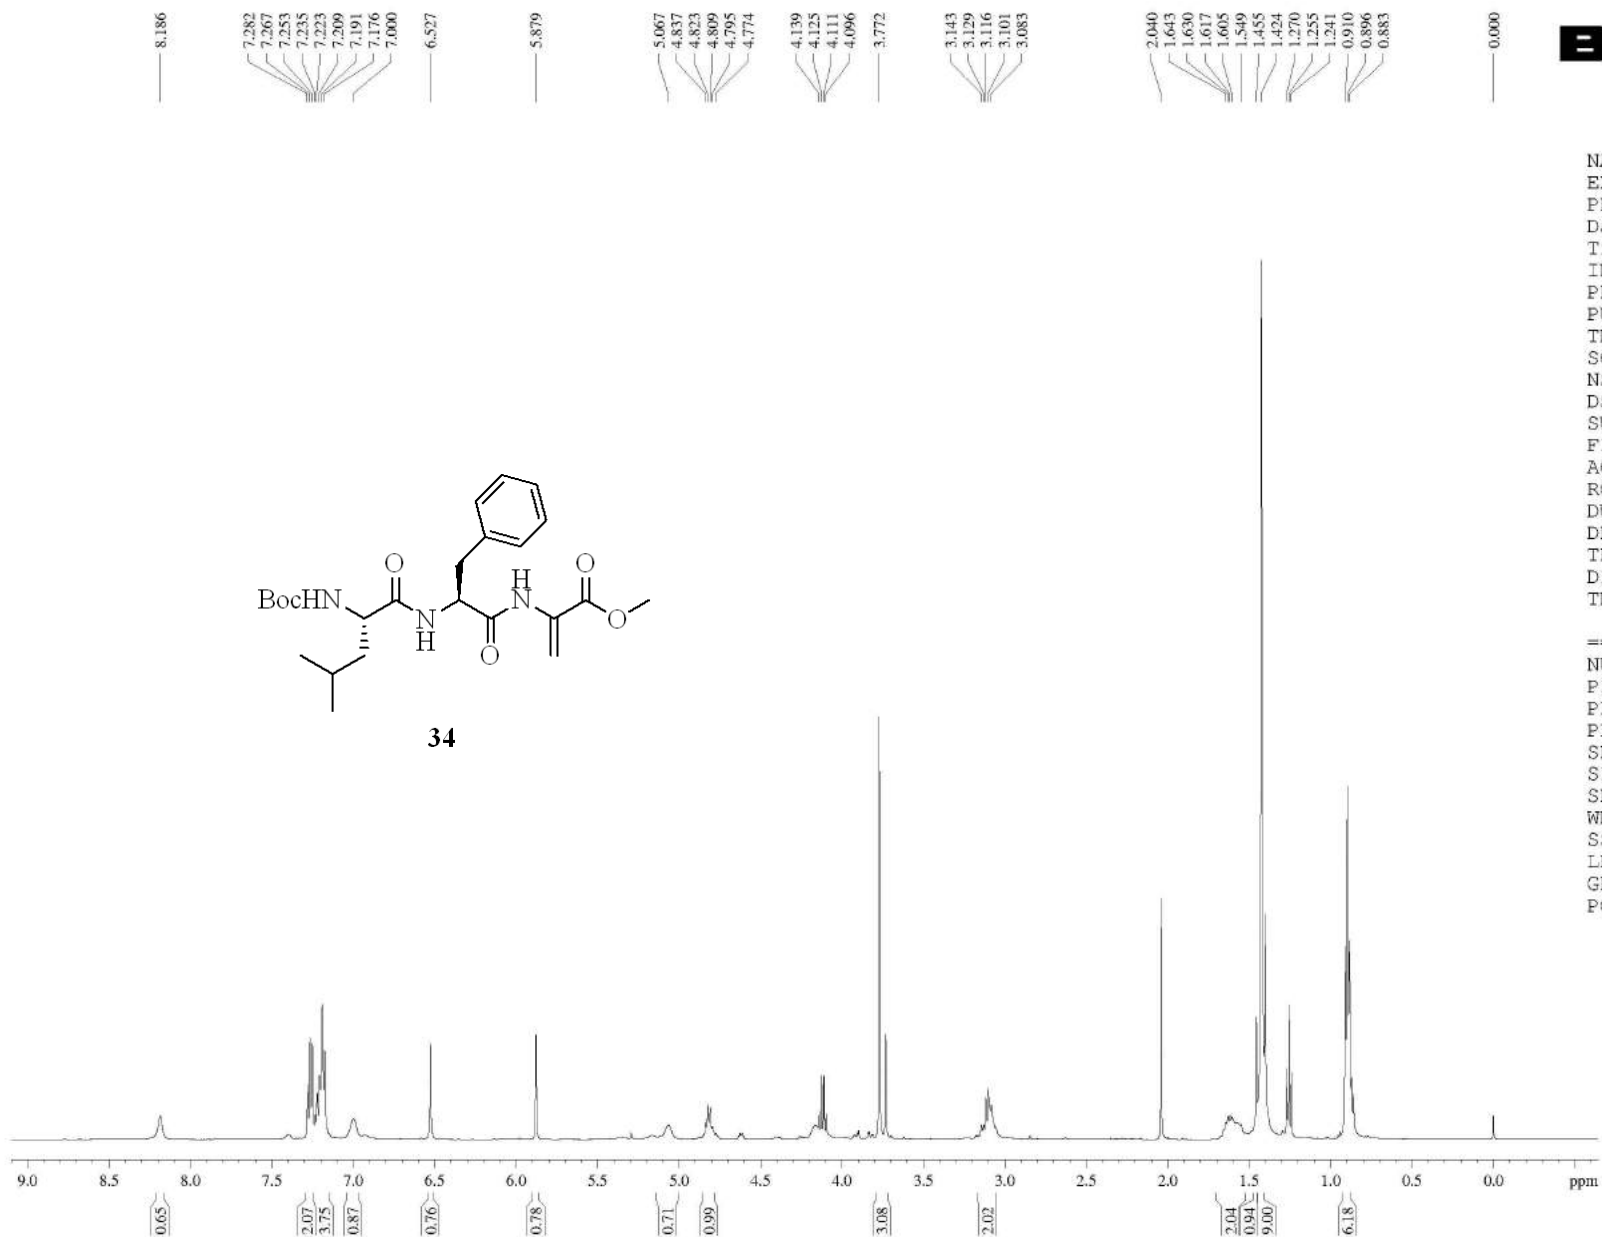

1-liushouxin-2018-5-26-zy-3

169.70  
163.84  
155.68  
136.17  
130.80  
129.26  
128.64  
127.02  
109.83  
77.36  
77.10  
76.85  
60.40  
55.06  
52.87  
41.21  
38.16  
28.29  
27.67  
24.70  
22.94  
14.19

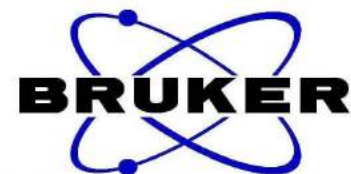

NAME 2018.06.08  
EXPNO 20  
PROCNO 1  
Date\_ 20180608  
Time 17.58  
INSTRUM spect  
PROBHD 5 mm PADUL 13C  
PULPROG zgpg30  
TD 32768  
SOLVENT CDC13  
NS 512  
DS 0  
SWH 29761.904 Hz  
FIDRES 0.908261 Hz  
AQ 0.5505524 sec  
RG 2050  
DW 16.800 usec  
DE 6.50 usec  
TE 299.7 K  
D1 2.00000000 sec  
D11 0.03000000 sec  
TDO 1

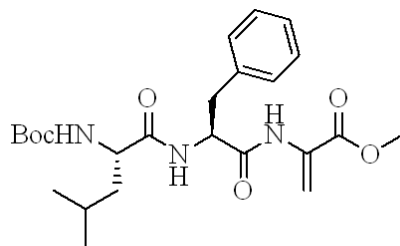

34

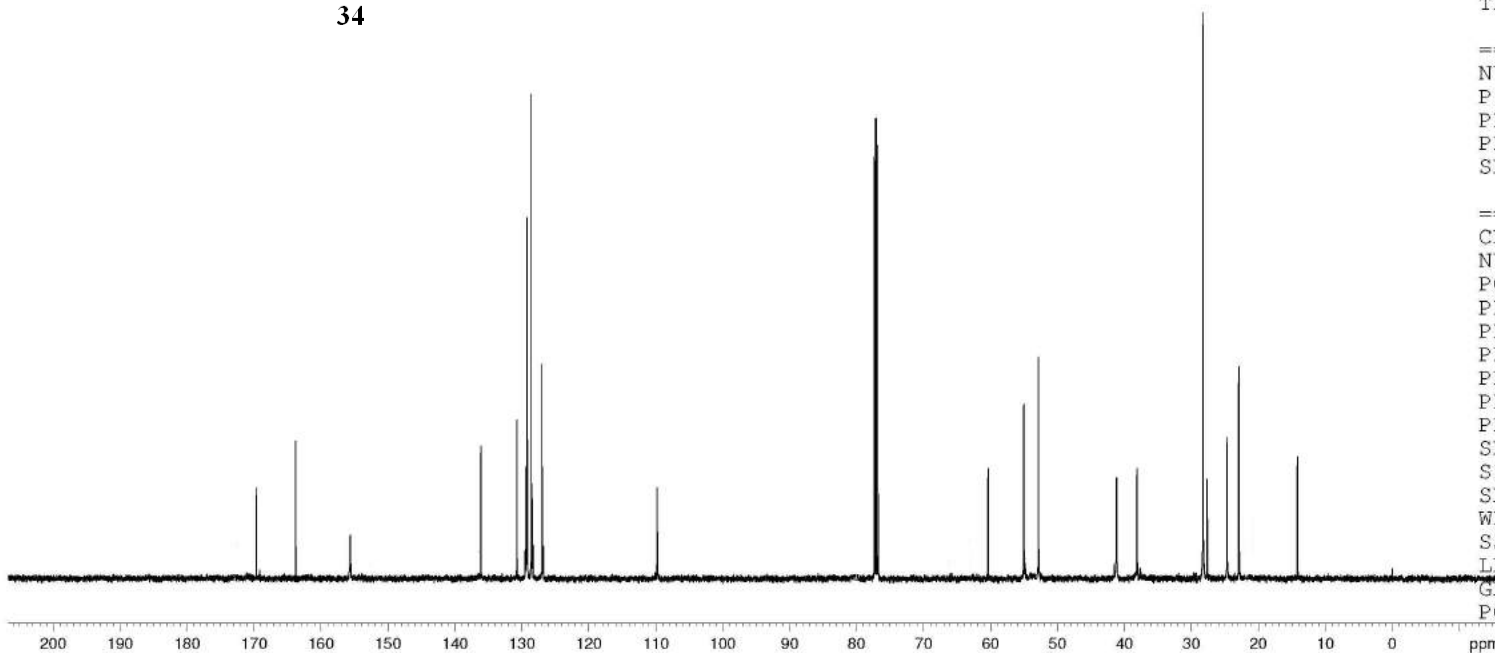

==== CHANNEL f1 =====  
NUC1 13C  
P1 12.00 usec  
PL1 4.50 dB  
PL1W 33.60015869 W  
SFO1 125.7703643 MHz  
  
==== CHANNEL f2 =====  
CPDPRG2 waltz16  
NUC2 1H  
PCPD2 80.00 usec  
PL2 2.00 dB  
PL12 17.46 dB  
PL13 17.46 dB  
PL2W 16.79986763 W  
PL12W 0.47786582 W  
PL13W 0.47786582 W  
SFO2 500.1320005 MHz  
SI 32768  
SF 125.7577890 MHz  
WDW EM  
SSB 0  
LB 1.00 Hz  
GB 0  
PC 1.40

liushouxin-ZY-2019.1.22

7.248  
7.236  
7.222  
7.199  
7.191  
7.186  
7.174  
6.858  
6.841

6.185  
5.744  
5.726

4.771  
4.754  
4.745  
4.728

3.780  
3.649  
3.633  
3.620  
3.354  
3.061  
3.051  
3.033  
3.023  
3.003  
2.995  
2.883  
2.864  
2.856  
2.836  
2.799  
2.788  
2.779  
2.771  
2.761  
2.752  
2.500

1.482  
1.454  
1.443  
1.415  
1.359  
1.305  
1.295  
1.286  
1.275  
1.247  
1.234  
0.828  
0.815  
0.790  
0.778



NAME 2019.01.22  
EXPNO 5  
PROCNO 1  
Date\_ 20190122  
Time 17.29  
INSTRUM spect  
PROBHD 5 mm PADUL 13C  
PULPROG zg30  
TD 65536  
SOLVENT DMSO  
NS 16  
DS 0  
SWH 10330.578  
FIDRES 0.157632  
AQ 3.1719923  
RG 80.6  
DW 48.400  
DE 6.50  
TE 298.0  
D1 1.00000000  
TD0 1

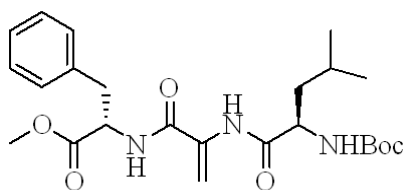

35

===== CHANNEL f1 =====  
NUC1 1H  
P1 13.50  
PL1 2.00  
PL1W 16.79986763  
SFO1 500.1330885  
SI 32768  
SF 500.1300092  
WDW EM  
SSB 0  
LB 1.00  
GB 0  
PC 1.00

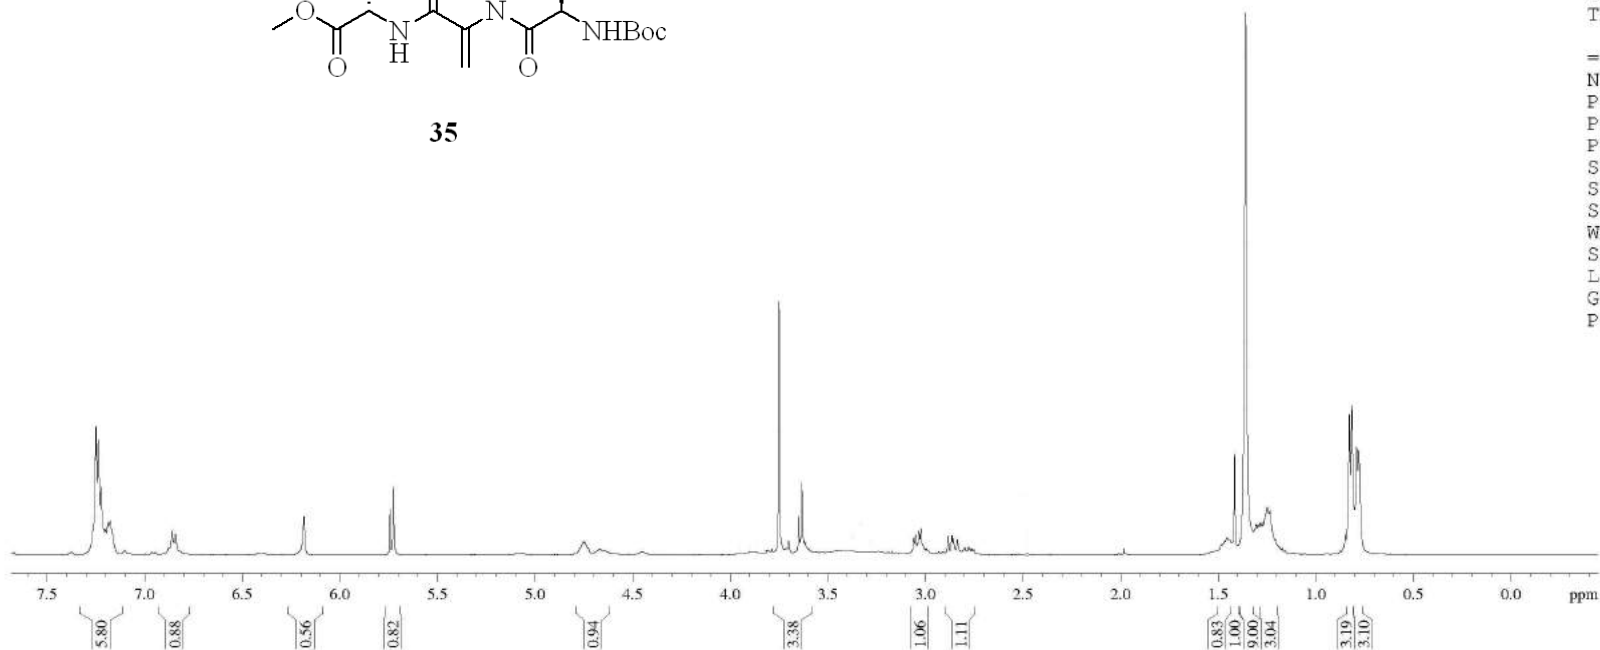



liushouxin-ZY-2019.1.22

173.06  
171.26  
164.12  
155.62  
137.81  
132.83  
129.72  
128.44  
126.74  
110.25  
78.54

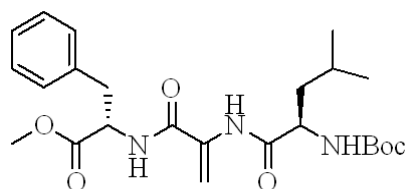

35

54.40  
53.42  
53.09  
41.30  
40.49  
40.32  
40.15  
39.99  
39.82  
39.65  
39.49  
28.63  
27.78  
24.62  
23.29  
22.03

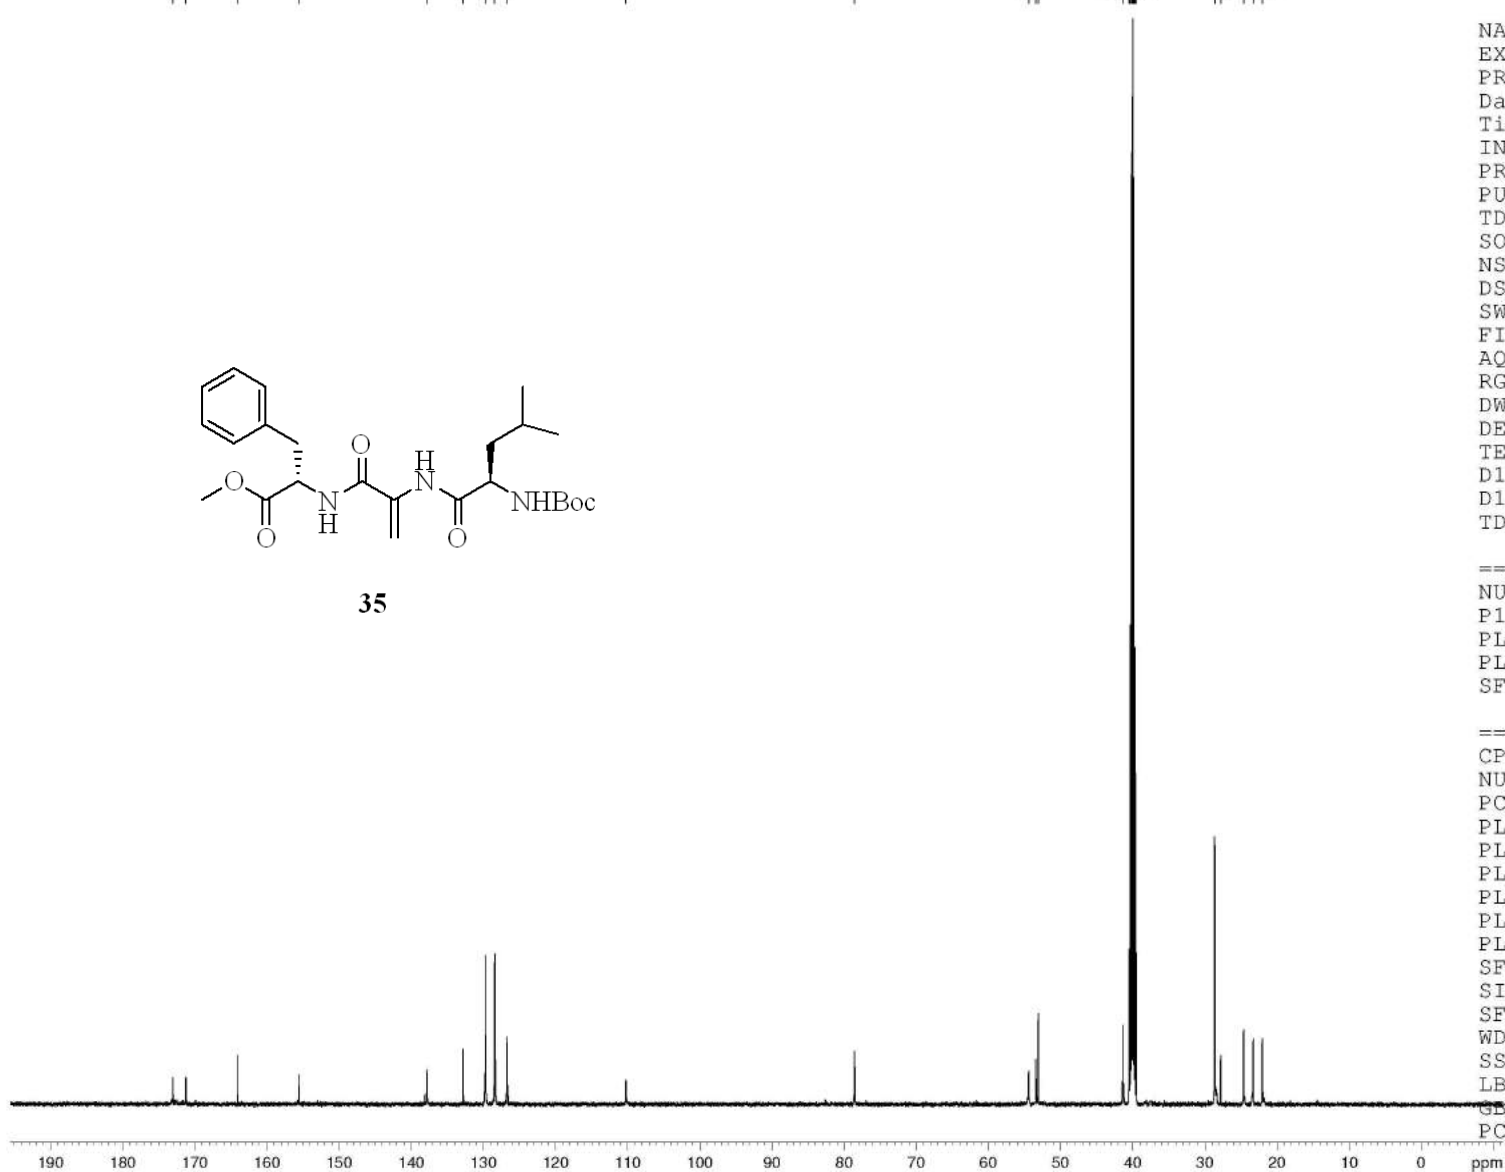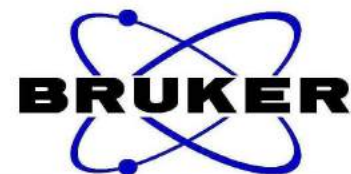

NAME 2019.01.22  
EXPNO 7  
PROCNO 1  
Date\_ 20190122  
Time 18.59  
INSTRUM spect  
PROBHD 5 mm PADUL 13C  
PULPROG zgpg30  
TD 32768  
SOLVENT DMSO  
NS 1279  
DS 4  
SWH 29761.904 Hz  
FIDRES 0.908261 Hz  
AQ 0.5505524 sec  
RG 912  
DW 16.800 usec  
DE 6.50 usec  
TE 298.0 K  
D1 2.0000000 sec  
D11 0.0300000 sec  
TD0 1

==== CHANNEL f1 =====  
NUC1 13C  
P1 12.00 usec  
PL1 4.50 dB  
PL1W 33.60015869 W  
SFO1 125.7703643 MHz

==== CHANNEL f2 =====  
CPDPRG2 waltz16  
NUC2 1H  
PCPD2 80.00 usec  
PL2 2.00 dB  
PL12 17.46 dB  
PL13 17.46 dB  
PL2W 16.79986763 W  
PL12W 0.47786582 W  
PL13W 0.47786582 W  
SFO2 500.1320005 MHz  
SI 32768  
SF 125.7577890 MHz  
WDW EM  
SSB 0  
LB 1.00 Hz  
GB 0  
PC 1.40



2018-10-11-zy



NAME 2018.10.11  
EXPNO 3  
PROCNO 1  
Date\_ 20181011  
Time 18.19  
INSTRUM spect  
PROBHD 5 mm PADUL 13C  
PULPROG zg30  
TD 65536  
SOLVENT DMSO  
NS 16  
DS 0  
SWH 7500.000  
FIDRES 0.114441  
AQ 4.3691168  
RG 322  
DW 66.667  
DE 6.50  
TE 296.5  
D1 1.00000000  
TD0 1

==== CHANNEL f1 ====  
NUC1 1H  
P1 13.50  
PL1 2.00  
PL1W 16.79986763  
SFO1 500.1330008  
SI 32768  
SF 500.1330094  
WDW EM  
SSB 0  
LB 1.00  
GB 0  
PC 1.00

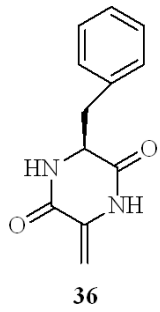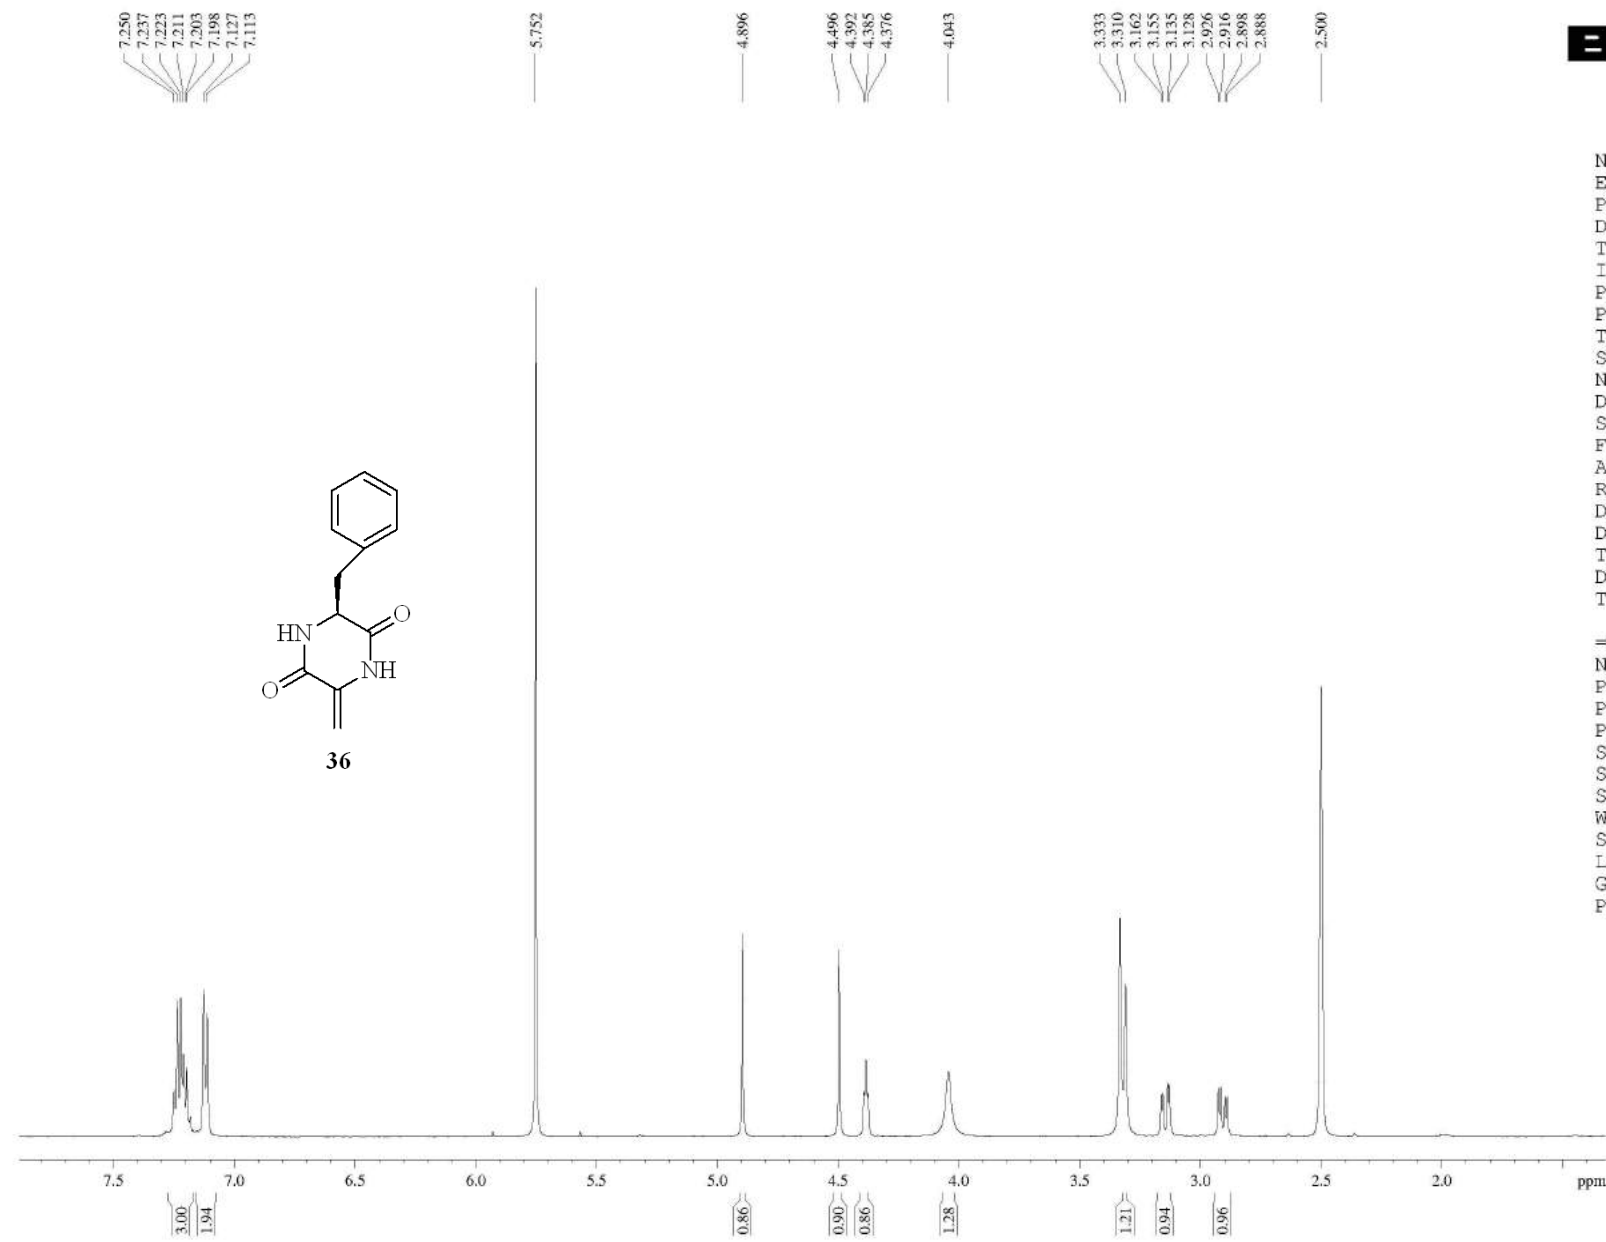

liushouxin-2018-10-11-zy

165.11  
158.06  
135.40  
134.21  
130.03  
128.04  
126.72

98.50

56.09  
55.99  
54.90  
40.02  
39.86  
39.69  
39.52  
39.36  
39.19  
39.02

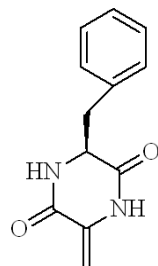

36

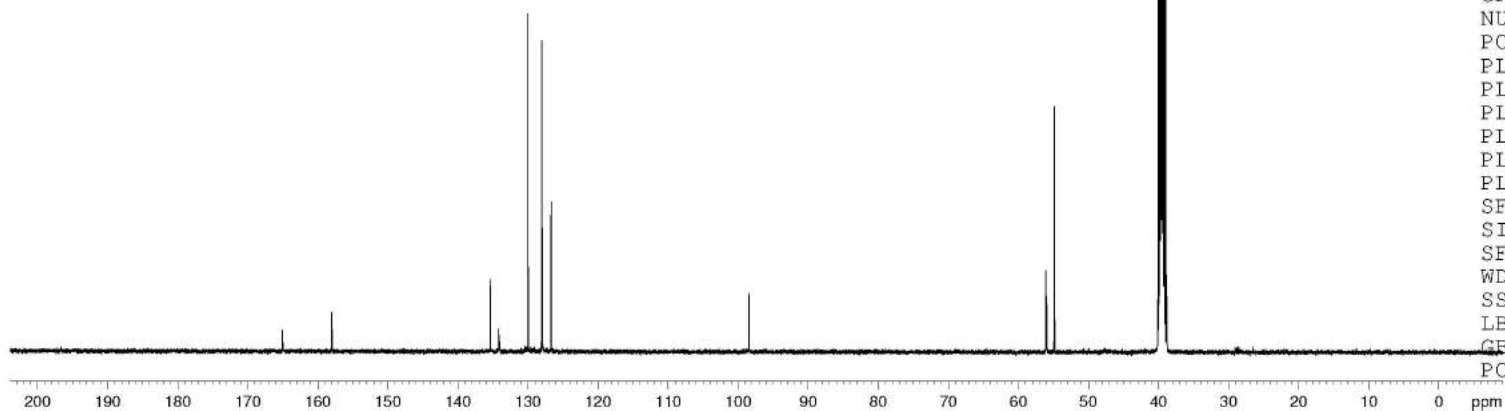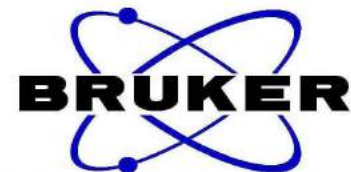

NAME 2018.10.19  
EXPNO 1  
PROCNO 1  
Date\_ 20181020  
Time 6.54  
INSTRUM spect  
PROBHD 5 mm PADUL 13C  
PULPROG zgpg30  
TD 32768  
SOLVENT DMSO  
NS 13312  
DS 0  
SWH 29761.904 Hz  
FIDRES 0.908261 Hz  
AQ 0.5505524 sec  
RG 1150  
DW 16.800 usec  
DE 6.50 usec  
TE 298.2 K  
D1 2.00000000 sec  
D11 0.03000000 sec  
TD0 1

==== CHANNEL f1 =====  
NUC1 13C  
P1 12.00 usec  
PL1 4.50 dB  
PL1W 33.60015869 W  
SFO1 125.7703643 MHz

==== CHANNEL f2 =====  
CPDPRG2 waltz16  
NUC2 1H  
PCPD2 80.00 usec  
PL2 2.00 dB  
PL12 17.46 dB  
PL13 17.46 dB  
PL2W 16.79986763 W  
PL12W 0.47786582 W  
PL13W 0.47786582 W  
SFO2 500.1320005 MHz  
SI 32768  
SF 125.7578489 MHz  
WDW EM  
SSB 0  
LB 1.00 Hz  
GB 0  
PC 1.40

ZY-2018-10-29



NAME 2018.10.30  
EXPNO 6  
PROCNO 1  
Date\_ 20181030  
Time 13.12  
INSTRUM spect  
PROBHD 5 mm PADUL 13C  
PULPROG zg30  
TD 65536  
SOLVENT MeOD  
NS 16  
DS 0  
SWH 10000.000  
FIDRES 0.152588  
AQ 3.2768500  
RG 256  
DW 50.000  
DE 6.50  
TE 294.9  
D1 1.00000000  
TD0 1

===== CHANNEL f1 =====  
NUC1 1H  
P1 13.50  
PL1 2.00  
PL1W 16.79986763  
SFO1 500.1330008  
SI 32768  
SF 500.1300156  
WDW EM  
SSB 0  
LB 1.00  
GB 0  
PC 1.00

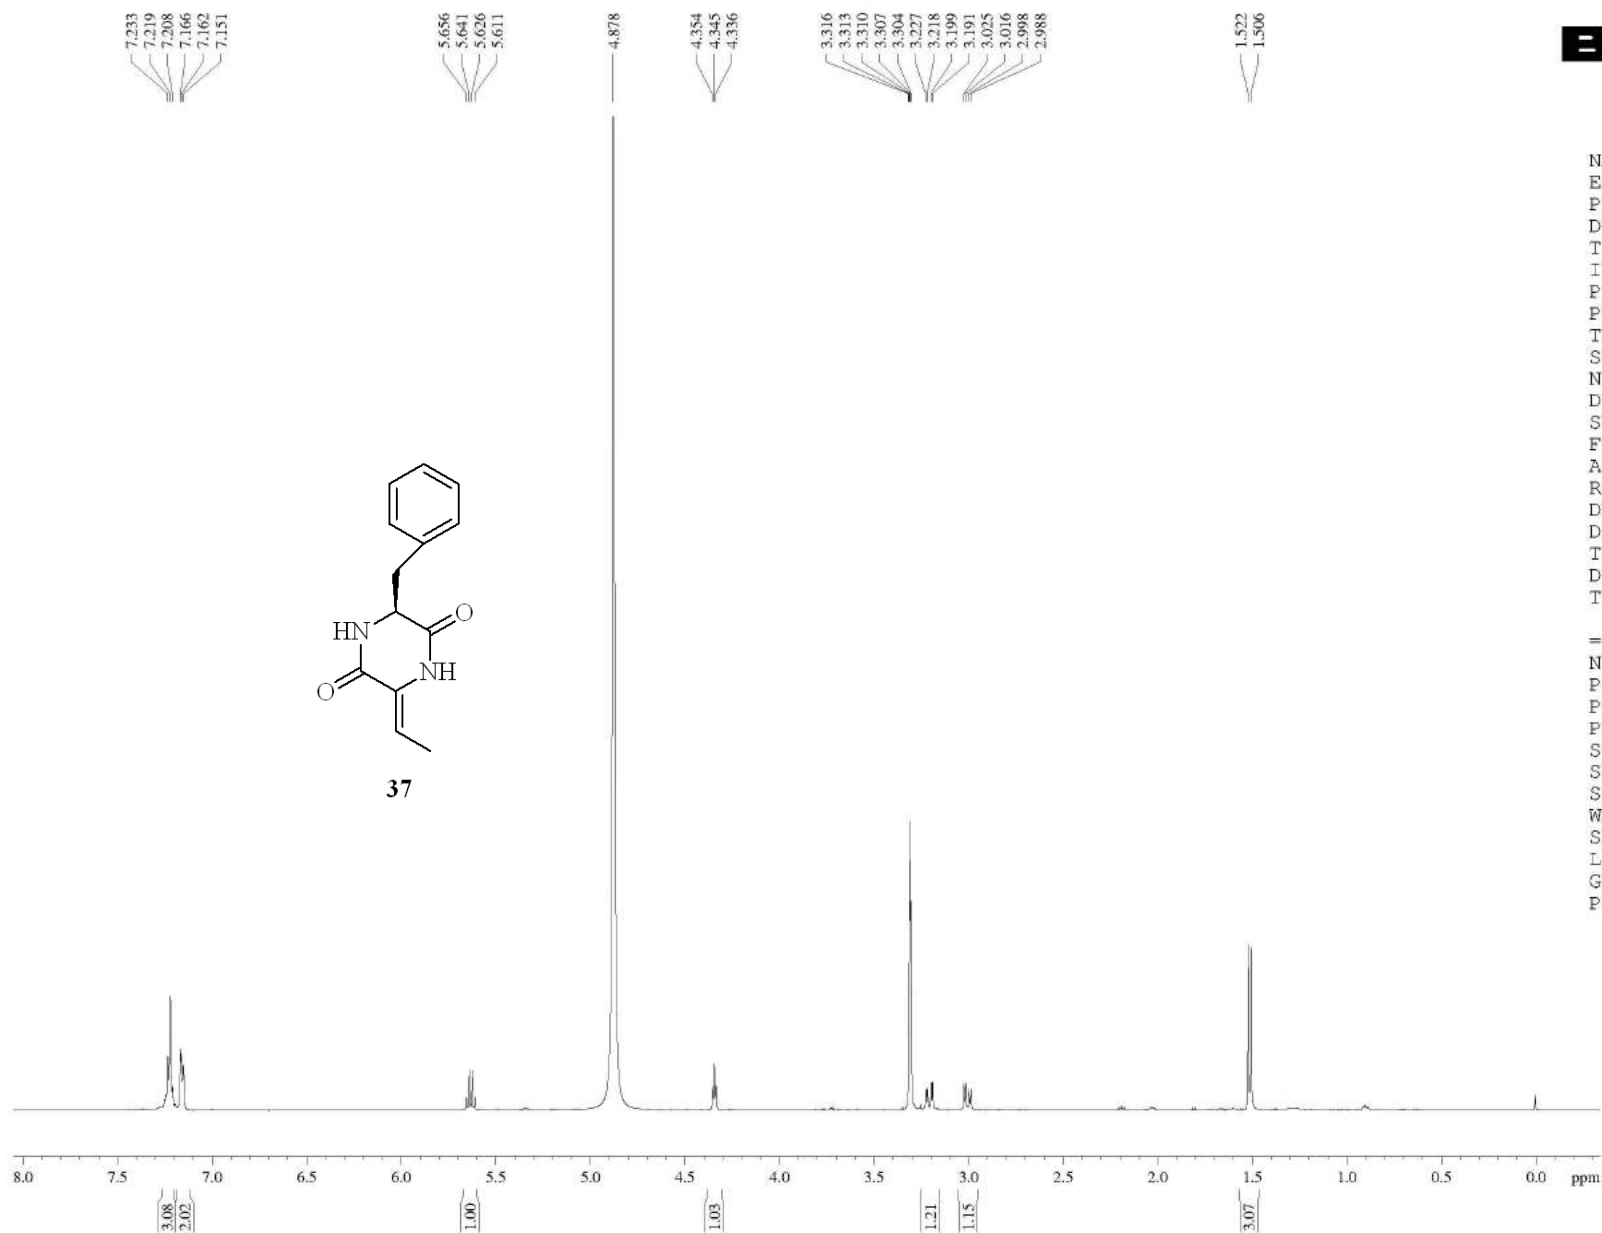

liushouxin-ZY-2018-10-29

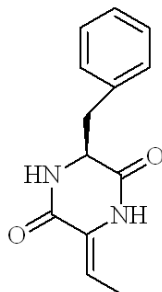

37

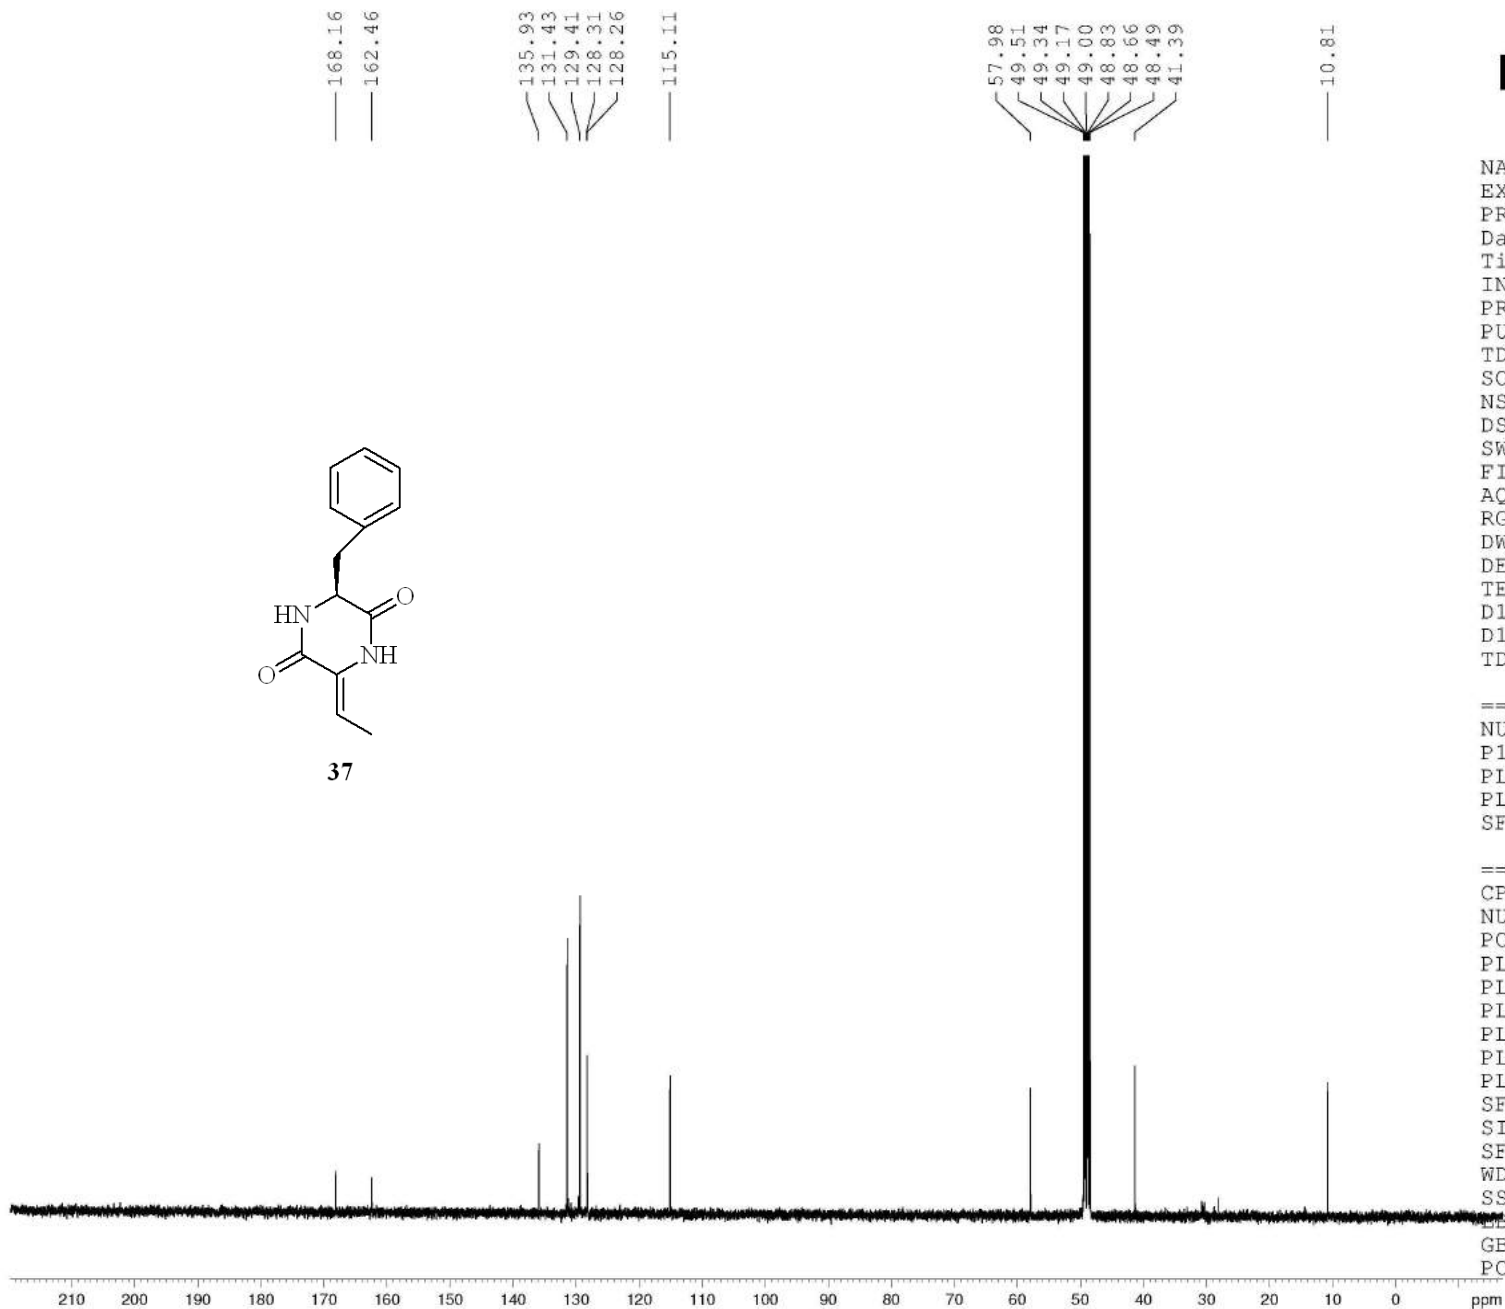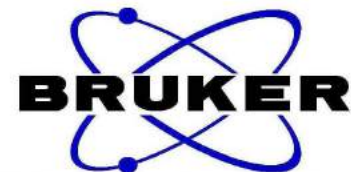

NAME 2018.11.21  
EXPNO 15  
PROCNO 1  
Date\_ 20181121  
Time 22.04  
INSTRUM spect  
PROBHD 5 mm PADUL 13C  
PULPROG zgpg30  
TD 32768  
SOLVENT MeOD  
NS 8192  
DS 0  
SWH 29761.904 Hz  
FIDRES 0.908261 Hz  
AQ 0.5505524 sec  
RG 1030  
DW 16.800 usec  
DE 6.50 usec  
TE 295.7 K  
D1 2.00000000 sec  
D11 0.03000000 sec  
TD0 1

===== CHANNEL f1 =====  
NUC1 13C  
P1 12.00 usec  
PL1 4.50 dB  
PL1W 33.60015869 W  
SFO1 125.7703643 MHz

===== CHANNEL f2 =====  
CPDPRG2 waltz16  
NUC2 1H  
PCPD2 80.00 usec  
PL2 2.00 dB  
PL12 17.46 dB  
PL13 17.46 dB  
PL2W 16.79986763 W  
PL12W 0.47786582 W  
PL13W 0.47786582 W  
SFO2 500.1320005 MHz  
SI 32768  
SF 125.7576132 MHz  
WDW EM  
SSB 0  
LB 1.00 Hz  
GB 0  
PC 1.40

liushouxin-xh-SR-T

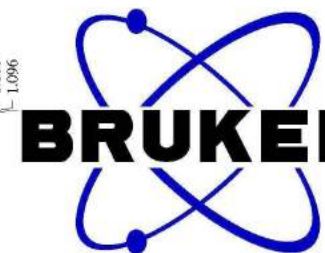

NAME 2020.12.29  
 EXPNO 9  
 PROCNO 1  
 Date\_ 20201229  
 Time 11.24  
 INSTRUM spect  
 PROBHD 5 mm PADUL 13C  
 PULPROG zg30  
 TD 65536  
 SOLVENT CDCl3  
 NS 8  
 DS 0  
 SWH 10000.000  
 FIDRES 0.152588  
 AQ 3.2768500  
 RG 50.8  
 DW 50.000  
 DE 6.50  
 TE 298.0  
 D1 1.00000000  
 TD0 1

===== CHANNEL f1 =====  
 NUC1 1H  
 P1 13.50  
 PL1 2.00  
 PL1W 16.79986763  
 SFO1 500.1340010  
 SI 32768  
 SF 500.1300224  
 WDW EM  
 SSB 0  
 LB 0.30  
 GB 0  
 PC 1.00

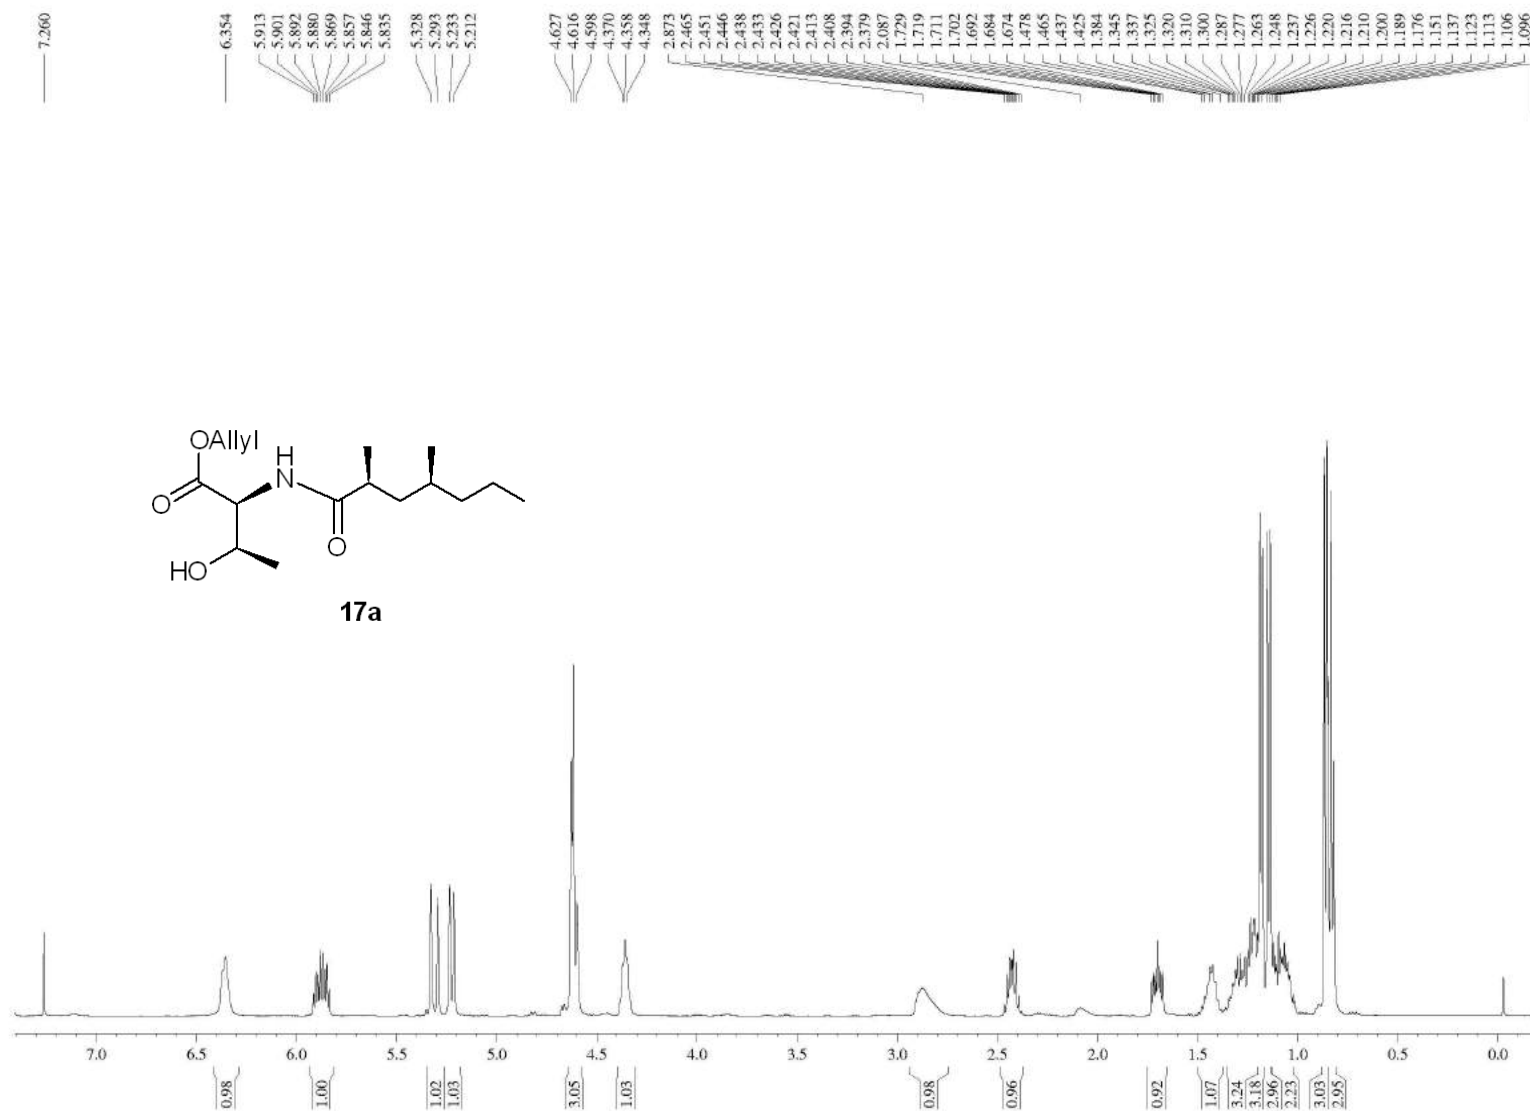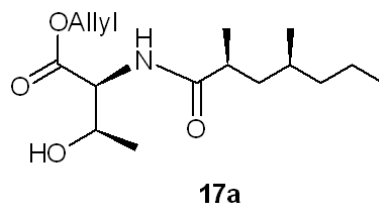

liushouxin-xh-SR-T

— 177.53  
— 170.95

— 131.60  
— 119.00

77.42  
77.16  
76.91  
68.12  
66.22  
57.01

41.88  
39.63  
39.35  
30.40

20.02  
19.70  
19.01  
14.42

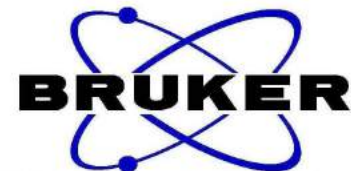

NAME 2021.03.11  
EXPNO 11  
PROCNO 1  
Date\_ 20210317  
Time 17.18  
INSTRUM spect  
PROBHD 5 mm PADUL 13C  
PULPROG zgpg30  
TD 32768  
SOLVENT CDC13  
NS 10240  
DS 0  
SWH 29761.904 Hz  
FIDRES 0.908261 Hz  
AQ 0.5505524 sec  
RG 1150  
DW 16.800 usec  
DE 6.50 usec  
TE 298.0 K  
D1 2.00000000 sec  
D11 0.03000000 sec  
TD0 1

==== CHANNEL f1 =====  
NUC1 13C  
P1 12.00 usec  
PL1 4.50 dB  
PL1W 33.60015869 W  
SFO1 125.7703643 MHz

==== CHANNEL f2 =====  
CPDPRG2 waltz16  
NUC2 1H  
PCPD2 80.00 usec  
PL2 2.00 dB  
PL12 17.46 dB  
PL13 17.46 dB  
PL2W 16.79986763 W  
PL12W 0.47786582 W  
PL13W 0.47786582 W  
SFO2 500.1320005 MHz  
SI 32768  
SF 125.7577768 MHz  
WDW EM  
SSB 0  
LB 1.00 Hz  
GB 0  
PC 1.40

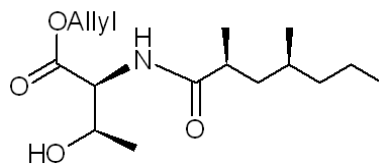

17a

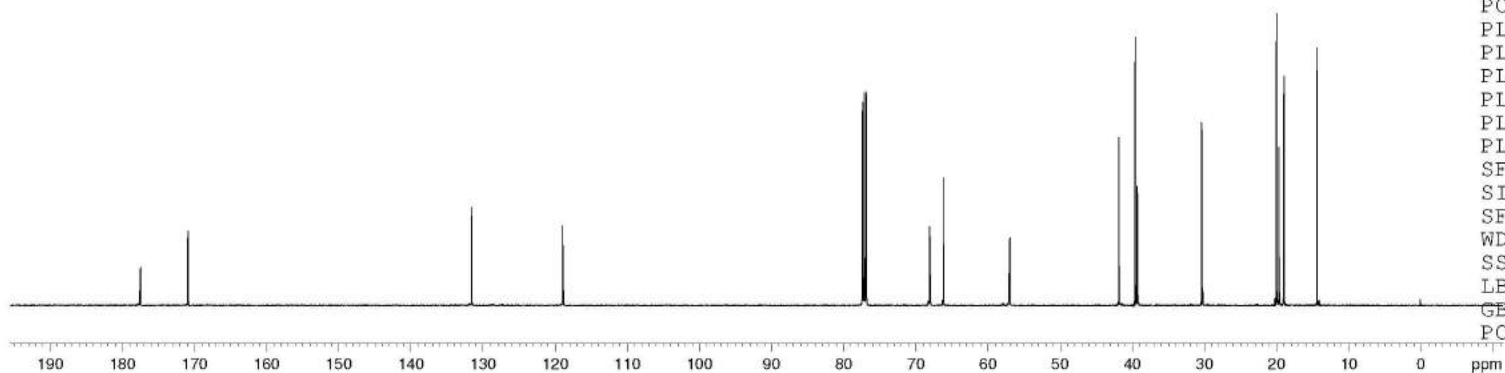

xh-rs-thr

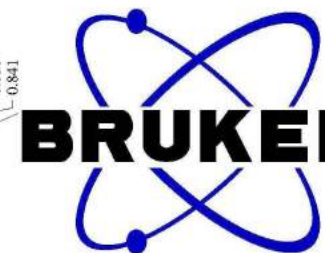

7.260 6.250 6.233 5.930 5.920 5.918 5.909 5.895 5.885 5.884 5.874 5.356 5.354 5.322 5.319 5.268 5.265 5.263 5.247 5.245 5.242 4.671 4.660 4.646 4.641 4.628 4.623 4.393 4.388 4.380 4.371 4.366 4.366 3.877 3.864 2.456 2.445 2.442 2.437 2.431 2.426 2.424 2.413 2.413 2.270 2.261 2.215 2.205 1.757 1.747 1.738 1.738 1.728 1.720 1.711 1.701 1.695 1.444 1.431 1.431 1.338 1.329 1.291 1.282 1.278 1.270 1.257 1.250 1.235 1.220 1.207 1.207 1.164 1.151 1.138 1.134 1.128 1.117 1.111 1.099 1.092 1.088 1.082 0.931 0.918 0.892 0.879 0.870 0.856 0.841

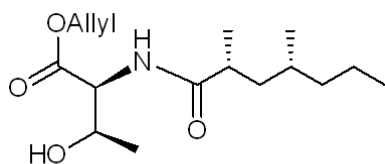

17b

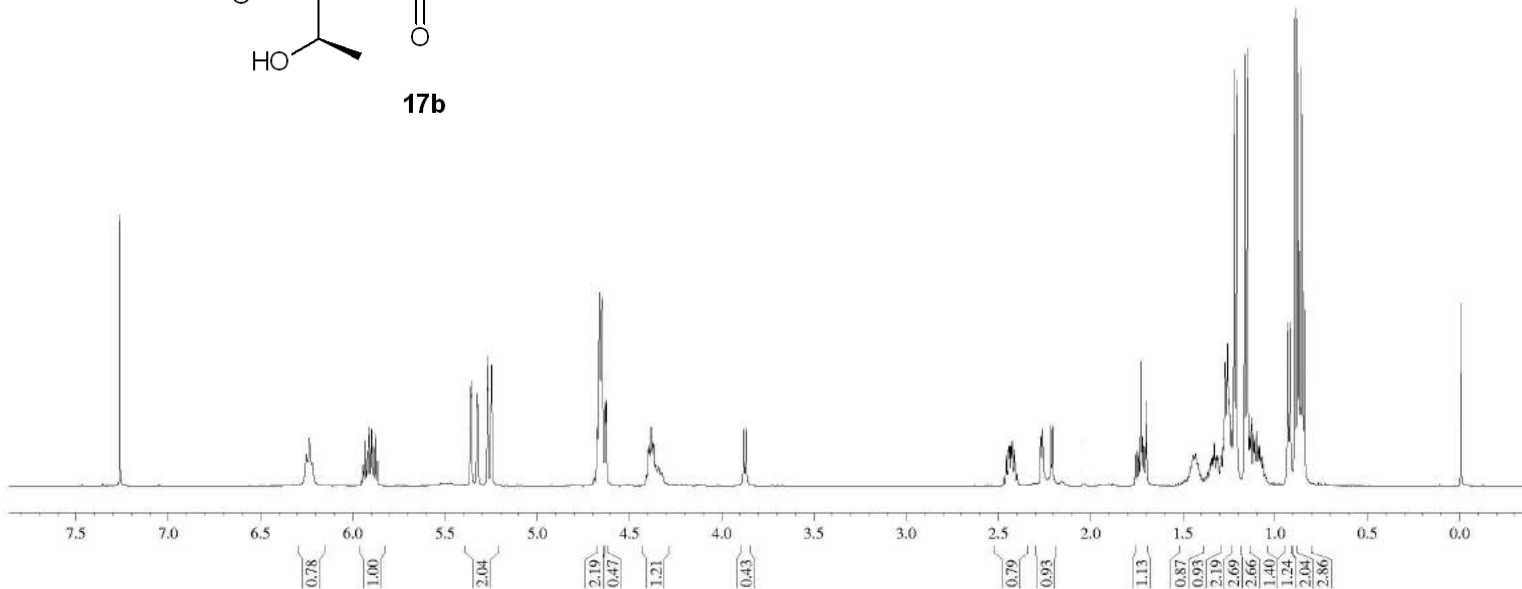

NAME 2020.12.18  
EXPNO 13  
PROCNO 1  
Date\_ 20201218  
Time 19.36  
INSTRUM spect  
PROBHD 5 mm PADUL 13C  
PULPROG zg30  
TD 65536  
SOLVENT CDCl3  
NS 22  
DS 0  
SWH 5000.000  
FIDRES 0.076294  
AQ 6.5536499  
RG 161  
DW 100.000  
DE 6.50  
TE 298.0  
D1 1.00000000  
TD0 1

===== CHANNEL f1 =====  
NUC1 1H  
P1 13.50  
PL1 2.00  
PL1W 16.79986763  
SFO1 500.1322506  
SI 32768  
SF 500.1300228  
WDW EM  
SSB 0  
LB 0.30  
GB 0  
PC 1.00



liushouxin-xh-RS-Thr

— 177.45  
— 171.05

— 131.59  
— 119.05

77.41  
77.16  
76.90  
68.13  
66.26  
57.08

41.84  
39.63  
39.43  
30.59  
20.10  
20.05  
19.64  
18.81  
14.40



NAME 2021.03.11  
EXPNO 18  
PROCNO 1  
Date\_ 20210324  
Time 17.18  
INSTRUM spect  
PROBHD 5 mm PADUL 13C  
PULPROG zgpg30  
TD 32768  
SOLVENT CDC13  
NS 10240  
DS 0  
SWH 29761.904 Hz  
FIDRES 0.908261 Hz  
AQ 0.5505524 sec  
RG 1820  
DW 16.800 usec  
DE 6.50 usec  
TE 296.5 K  
D1 2.00000000 sec  
D11 0.03000000 sec  
TD0 1

==== CHANNEL f1 =====  
NUC1 13C  
P1 12.00 usec  
PL1 4.50 dB  
PL1W 33.60015869 W  
SFO1 125.7703643 MHz

==== CHANNEL f2 =====  
CPDPRG2 waltz16  
NUC2 1H  
PCPD2 80.00 usec  
PL2 2.00 dB  
PL12 17.46 dB  
PL13 17.46 dB  
PL2W 16.79986763 W  
PL12W 0.47786582 W  
PL13W 0.47786582 W  
SFO2 500.1320005 MHz  
SI 32768  
SF 125.7577748 MHz  
WDW EM  
SSB 0  
LB 1.00 Hz  
GB 0  
PC 1.40

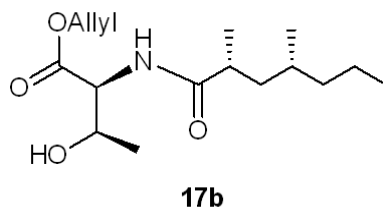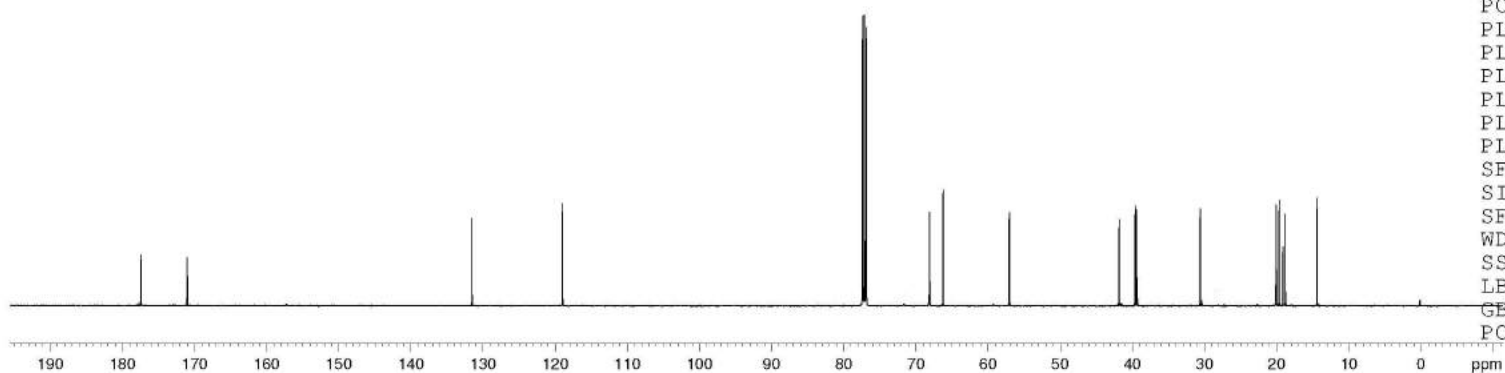



xh-thr-ss

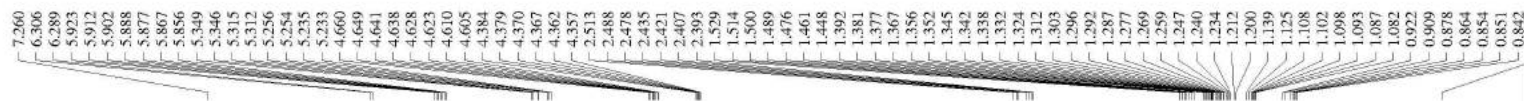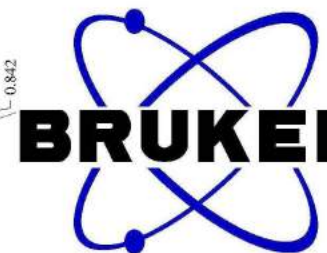

NAME 2020.12.03  
EXPNO 13  
PROCNO 1  
Date\_ 20201203  
Time 18.12  
INSTRUM spect  
PROBHD 5 mm PADUL 13C  
PULPROG zg30  
TD 65536  
SOLVENT CDCl3  
NS 20  
DS 0  
SWH 10000.000  
FIDRES 0.152588  
AQ 3.2768500  
RG 114  
DW 50.000  
DE 6.50  
TE 298.0  
D1 1.00000000  
TD0 1

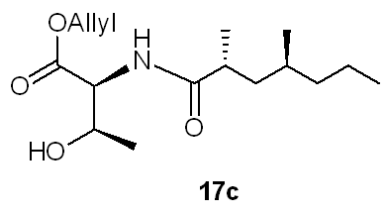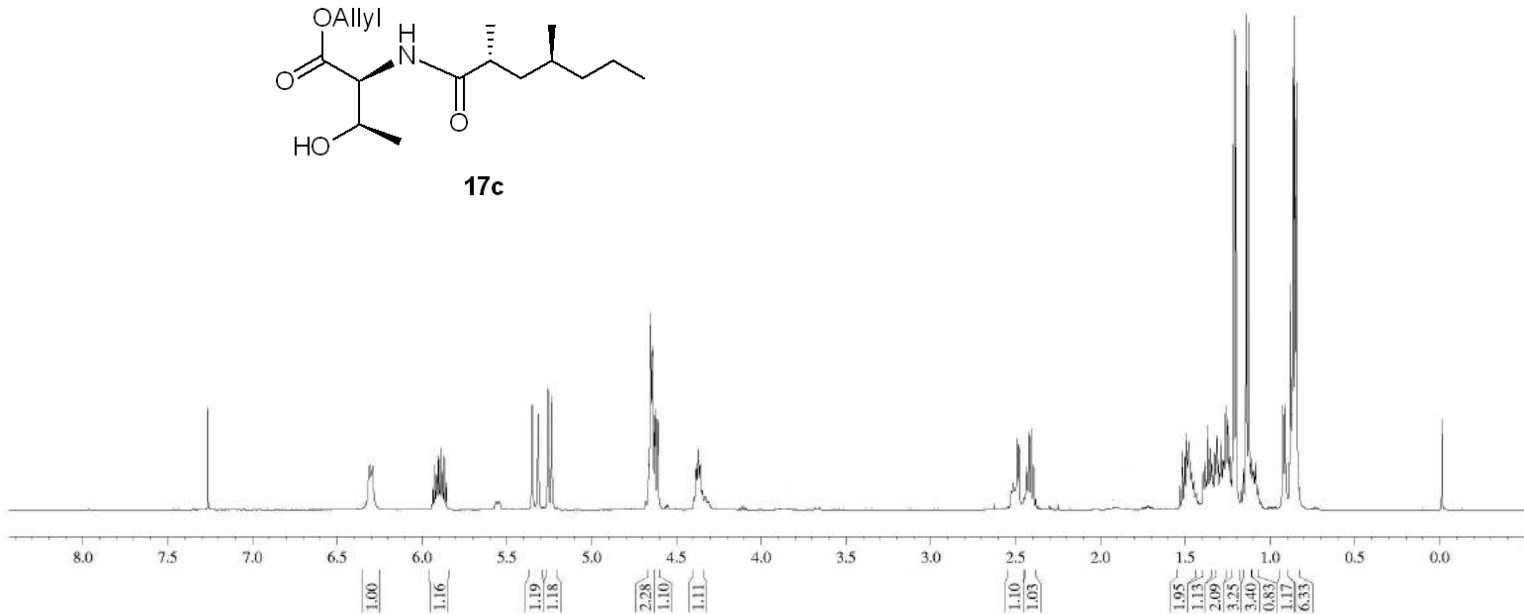

===== CHANNEL f1 =====  
NUC1 1H  
P1 13.50  
PL1 2.00  
PL1W 16.79986763  
SFO1 500.1340010  
SI 32768  
SF 500.1300230  
WDW EM  
SSB 0  
LB 0.30  
GB 0  
PC 1.00

liushouxin-xh--Thr-SS

— 177.83  
— 171.02

— 131.62  
— 118.90

77.41  
77.16  
76.90  
67.99  
66.17  
— 57.19

41.48  
39.34  
39.20  
— 30.34  
20.12  
20.03  
19.60  
17.82  
14.43



NAME 2021.03.11  
EXPNO 19  
PROCNO 1  
Date\_ 20210325  
Time 16.45  
INSTRUM spect  
PROBHD 5 mm PADUL 13C  
PULPROG zgpg30  
TD 32768  
SOLVENT CDC13  
NS 401  
DS 0  
SWH 29761.904 Hz  
FIDRES 0.908261 Hz  
AQ 0.5505524 sec  
RG 1820  
DW 16.800 usec  
DE 6.50 usec  
TE 296.4 K  
D1 2.00000000 sec  
D11 0.03000000 sec  
TD0 1

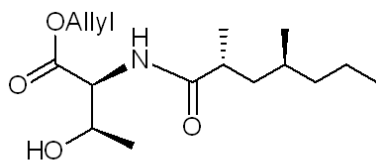

17c

==== CHANNEL f1 =====  
NUC1 13C  
P1 12.00 usec  
PL1 4.50 dB  
PL1W 33.60015869 W  
SFO1 125.7703643 MHz

==== CHANNEL f2 =====  
CPDPRG2 waltz16  
NUC2 1H  
PCPD2 80.00 usec  
PL2 2.00 dB  
PL12 17.46 dB  
PL13 17.46 dB  
PL2W 16.79986763 W  
PL12W 0.47786582 W  
PL13W 0.47786582 W  
SFO2 500.1320005 MHz  
SI 32768  
SF 125.7577786 MHz  
WDW EM  
SSB 0  
LB 1.00 Hz  
GB 0  
PC 1.40

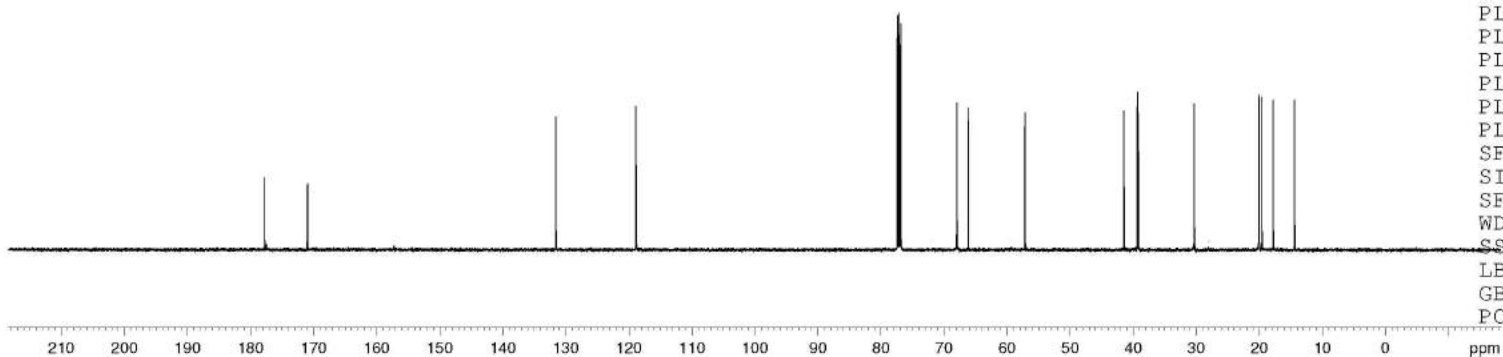

liushouxin-xh-SR-T-T

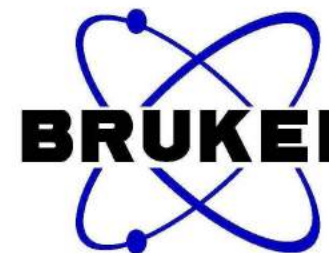

NAME 2020.12.29  
 EXPNO 10  
 PROCNO 1  
 Date\_ 20201229  
 Time 11.31  
 INSTRUM spect  
 PROBHD 5 mm PADUL 13C  
 PULPROG zg30  
 TD 65536  
 SOLVENT CDCl3  
 NS 8  
 DS 0  
 SWH 10000.000  
 FIDRES 0.152588  
 AQ 3.2768500  
 RG 50.8  
 DW 50.000  
 DE 6.50  
 TE 298.0  
 D1 1.00000000  
 TD0 1

===== CHANNEL f1 =====  
 NUC1 1H  
 P1 13.50  
 PL1 2.00  
 PL1W 16.79986763  
 SFO1 500.1340010  
 SI 32768  
 SF 500.1300224  
 WDW EM  
 SSB 0  
 LB 0.30  
 GB 0  
 PC 1.00

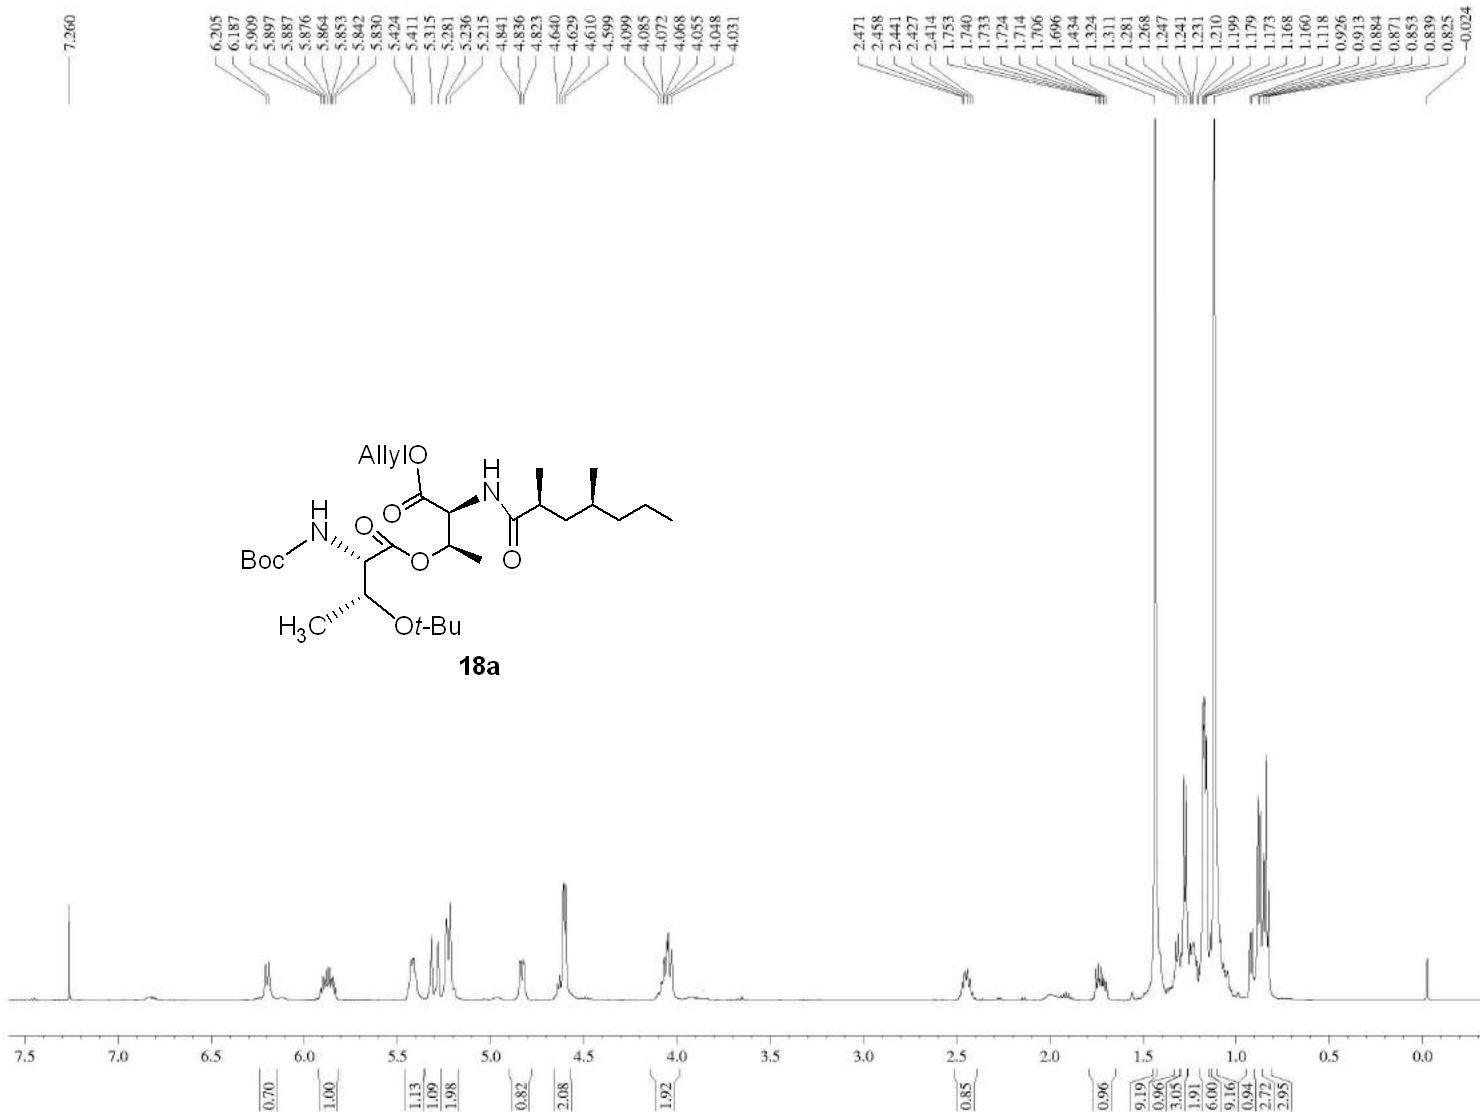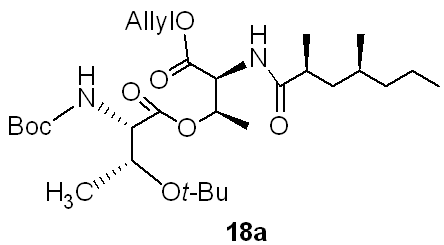

liushouxin-xh-SR-T-T

177.23  
170.64  
169.40  
156.04  
131.61  
119.25

79.85  
77.42  
77.16  
76.91  
74.07  
71.96  
67.08  
66.59  
59.41  
55.28

41.69  
39.56  
39.24  
30.40  
28.61  
28.41  
20.66  
20.02  
19.77  
19.08  
17.30  
14.40

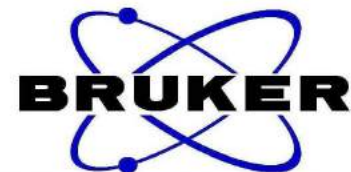

NAME 2021.03.11  
EXPNO 12  
PROCNO 1  
Date\_ 20210318  
Time 9.01  
INSTRUM spect  
PROBHD 5 mm PADUL 13C  
PULPROG zgpg30  
TD 32768  
SOLVENT CDC13  
NS 2391  
DS 0  
SWH 29761.904 Hz  
FIDRES 0.908261 Hz  
AQ 0.5505524 sec  
RG 1150  
DW 16.800 usec  
DE 6.50 usec  
TE 296.2 K  
D1 2.00000000 sec  
D11 0.03000000 sec  
TD0 1

===== CHANNEL f1 =====  
NUC1 13C  
P1 12.00 usec  
PL1 4.50 dB  
PL1W 33.60015869 W  
SFO1 125.7703643 MHz

===== CHANNEL f2 =====  
CPDPRG2 waltz16  
NUC2 1H  
PCPD2 80.00 usec  
PL2 2.00 dB  
PL12 17.46 dB  
PL13 17.46 dB  
PL2W 16.79986763 W  
PL12W 0.47786582 W  
PL13W 0.47786582 W  
SFO2 500.1320005 MHz  
SI 32768  
SF 125.7577776 MHz  
WDW EM  
SSB 0  
LB 1.00 Hz  
GB 0  
PC 1.40

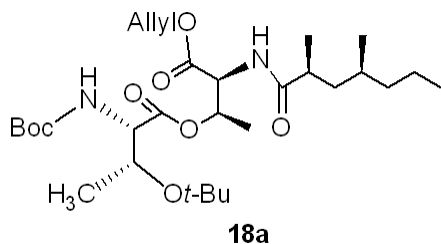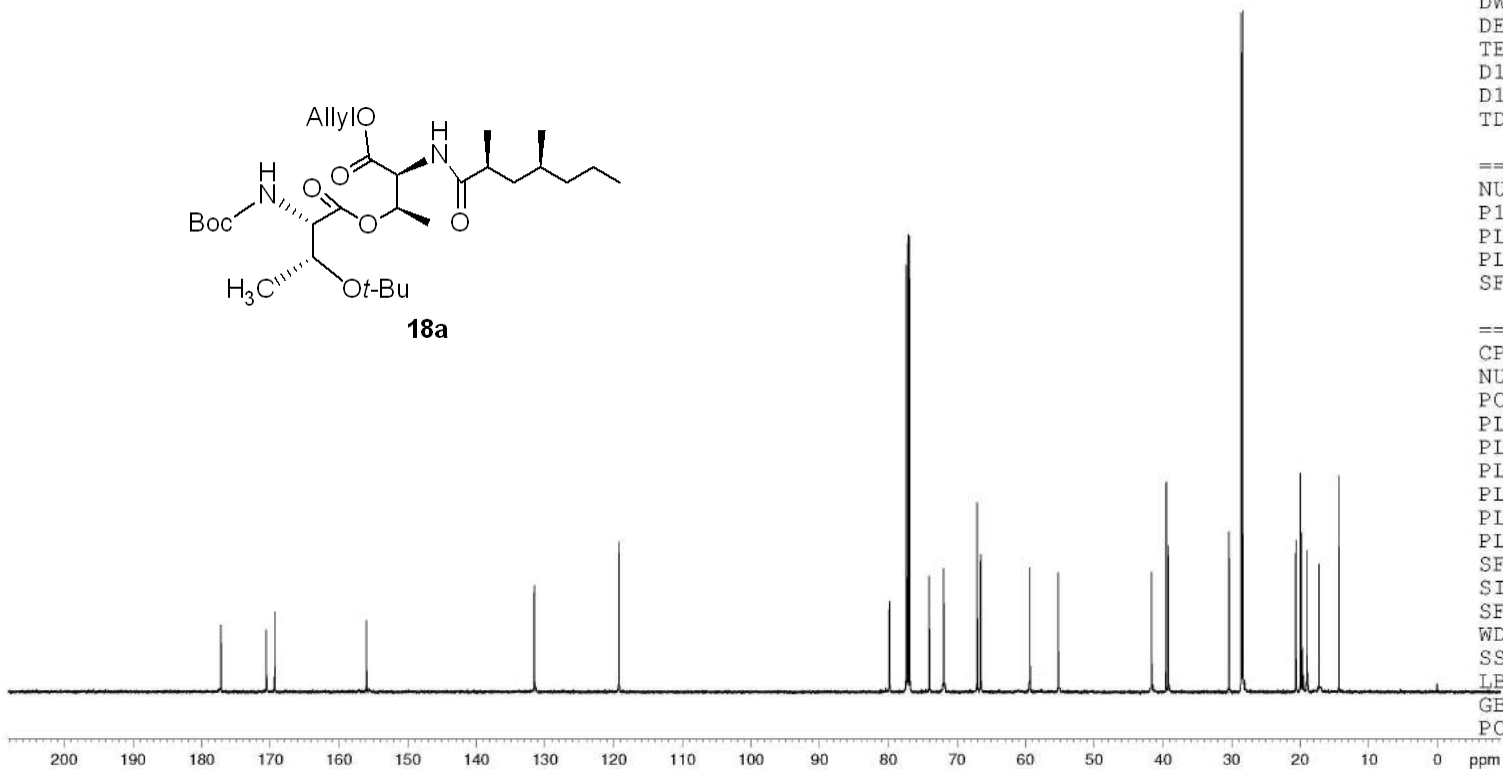

xh-rs-t-t

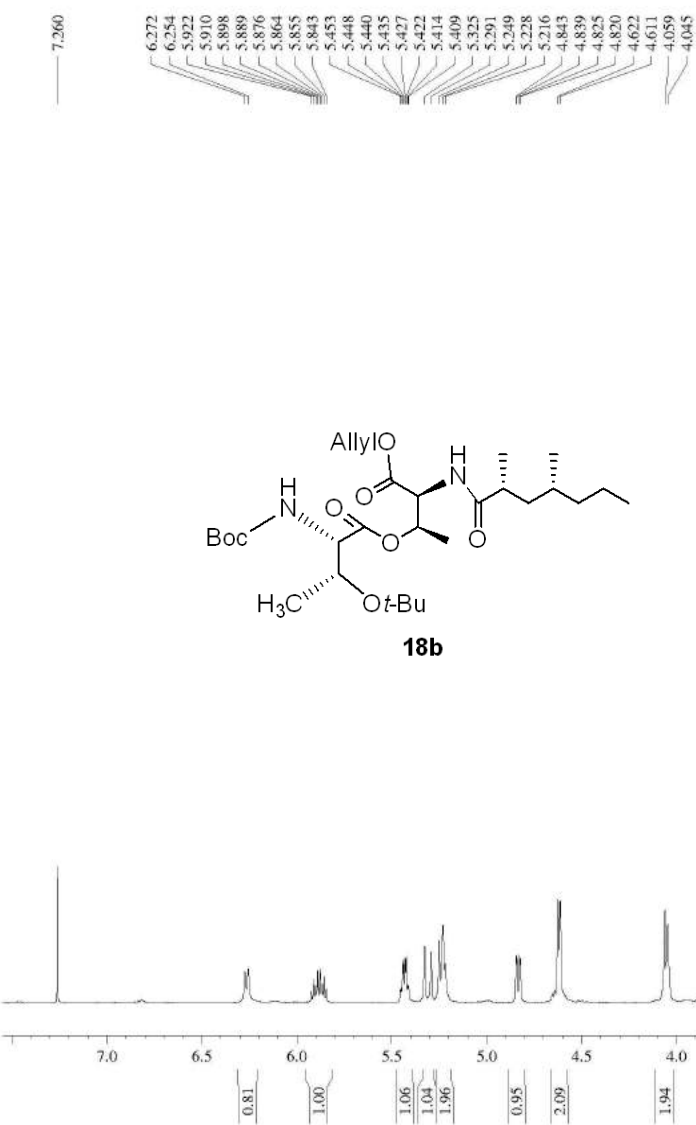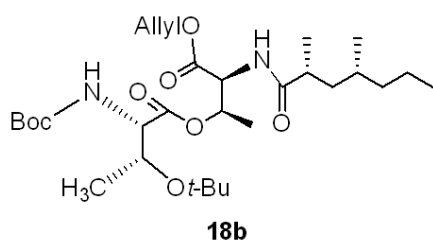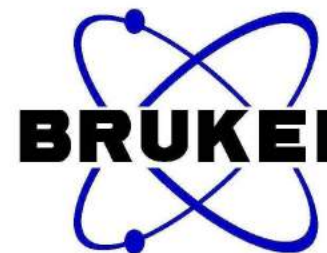

NAME 2020.12.23  
 EXPNO 24  
 PROCNO 1  
 Date\_ 20201223  
 Time 17.32  
 INSTRUM spect  
 PROBHD 5 mm PADUL 13C  
 PULPROG zg30  
 TD 65536  
 SOLVENT CDCl3  
 NS 16  
 DS 0  
 SWH 10000.000  
 FIDRES 0.152588  
 AQ 3.2768500  
 RG 80.6  
 DW 50.000  
 DE 6.50  
 TE 298.0  
 D1 1.00000000  
 TD0 1

===== CHANNEL f1 =====  
 NUC1 1H  
 P1 13.50  
 PL1 2.00  
 PL1W 16.79986763  
 SFO1 500.1340010  
 SI 32768  
 SF 500.1300227  
 WDW EM  
 SSB 0  
 LB 0.30  
 GB 0  
 PC 1.00

liushouxin-xh--RS-T-T

— 177.23  
— 170.59  
— 169.51  
— 156.03  
— 131.66  
— 119.29

79.91  
77.42  
77.16  
76.91  
74.14  
72.05  
67.18  
66.63  
59.40  
55.34

41.82  
39.63  
39.32  
30.62  
28.66  
28.45  
20.57  
20.06  
19.62  
18.75  
17.39  
14.39

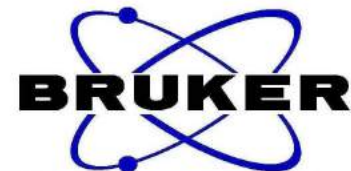

NAME 2021.03.11  
EXPNO 20  
PROCNO 1  
Date\_ 20210325  
Time 17.08  
INSTRUM spect  
PROBHD 5 mm PADUL 13C  
PULPROG zgpg30  
TD 32768  
SOLVENT CDC13  
NS 10240  
DS 0  
SWH 29761.904 Hz  
FIDRES 0.908261 Hz  
AQ 0.5505524 sec  
RG 1820  
DW 16.800 usec  
DE 6.50 usec  
TE 296.7 K  
D1 2.00000000 sec  
D11 0.03000000 sec  
TD0 1

==== CHANNEL f1 =====  
NUC1 13C  
P1 12.00 usec  
PL1 4.50 dB  
PL1W 33.60015869 W  
SFO1 125.7703643 MHz

==== CHANNEL f2 =====  
CPDPRG2 waltz16  
NUC2 1H  
PCPD2 80.00 usec  
PL2 2.00 dB  
PL12 17.46 dB  
PL13 17.46 dB  
PL2W 16.79986763 W  
PL12W 0.47786582 W  
PL13W 0.47786582 W  
SFO2 500.1320005 MHz  
SI 32768  
SF 125.7577748 MHz  
WDW EM  
SSB 0  
LB 1.00 Hz  
GB 0  
PC 1.40

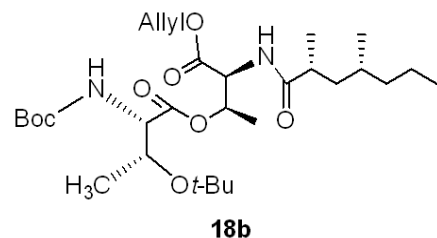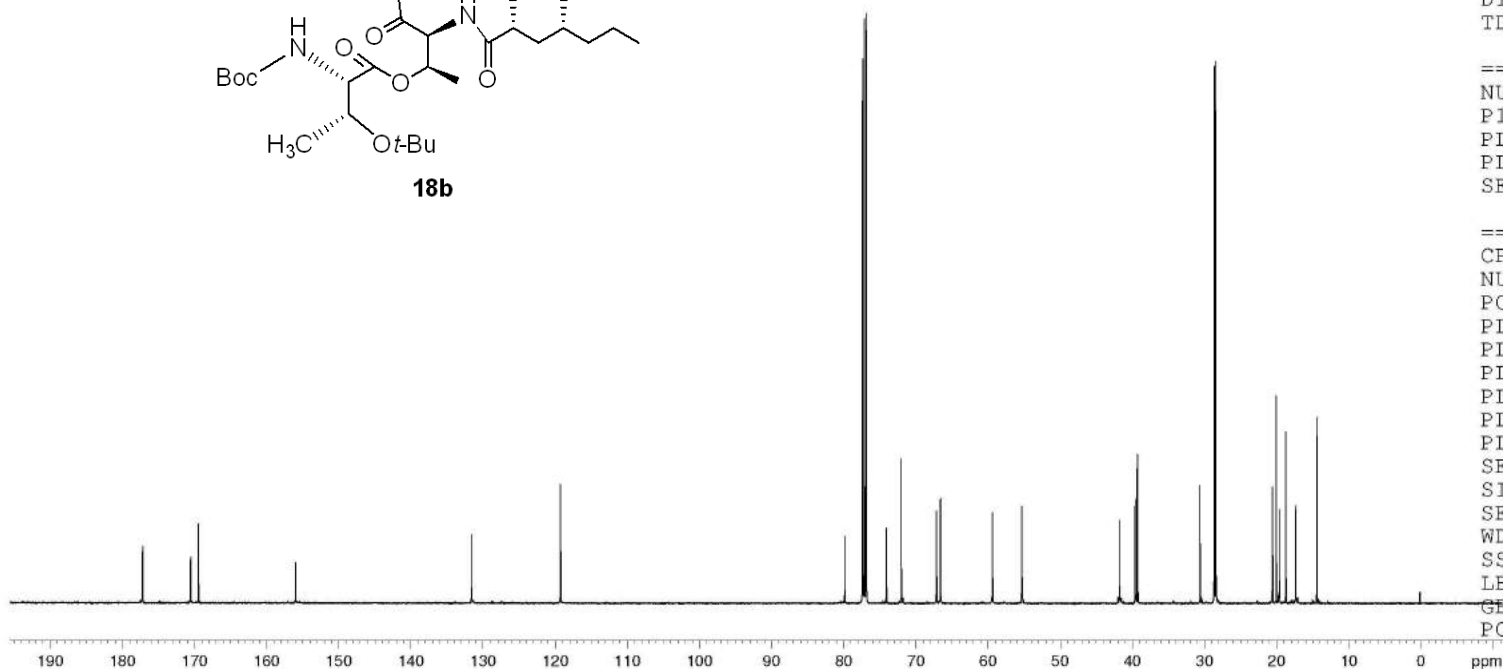



xh-ss-t-t

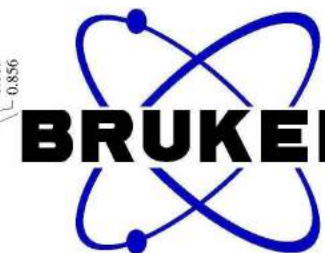

NAME 2020.12.09  
EXPNO 30  
PROCNO 1  
Date\_ 20201209  
Time 18.09  
INSTRUM spect  
PROBHD 5 mm PADUL 13C  
PULPROG zg30  
TD 65536  
SOLVENT CDCl3  
NS 32  
DS 0  
SWH 10000.000  
FIDRES 0.152588  
AQ 3.2768500  
RG 80.6  
DW 50.000  
DE 6.50  
TE 298.0  
D1 1.00000000  
TD0 1

===== CHANNEL f1 =====  
NUC1 1H  
P1 13.50  
PL1 2.00  
PL1W 16.79986763  
SFO1 500.1340010  
SI 32768  
SF 500.1300226  
WDW EM  
SSB 0  
LB 0.30  
GB 0  
PC 1.00

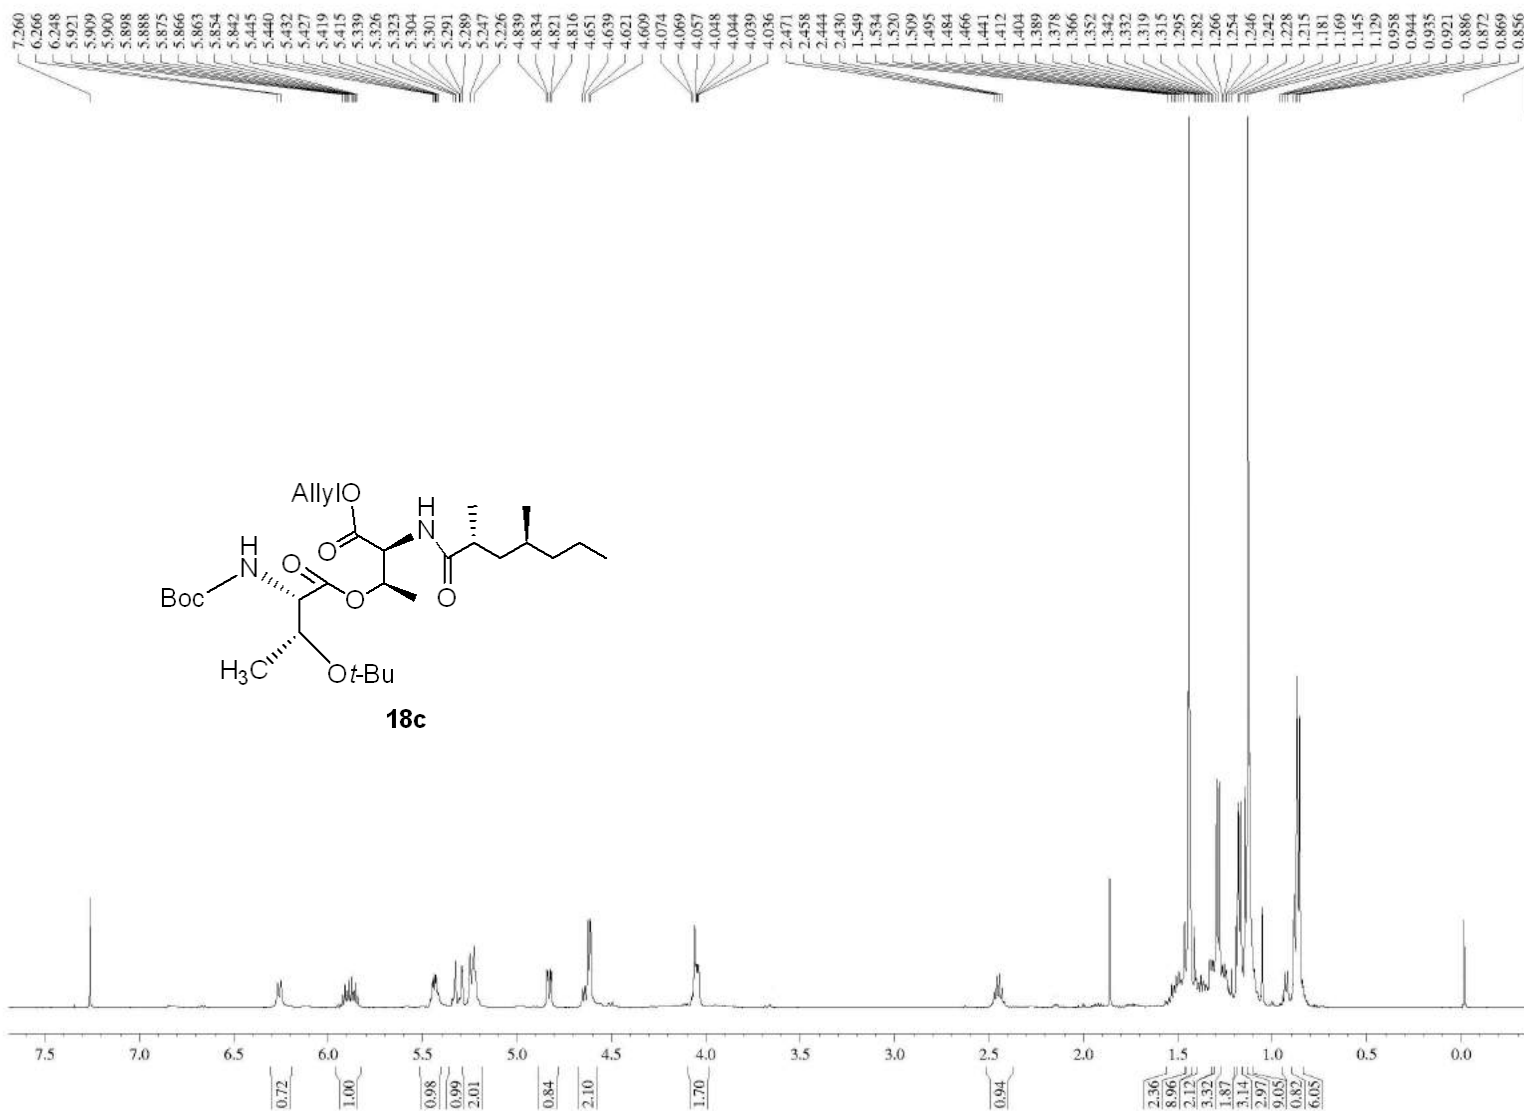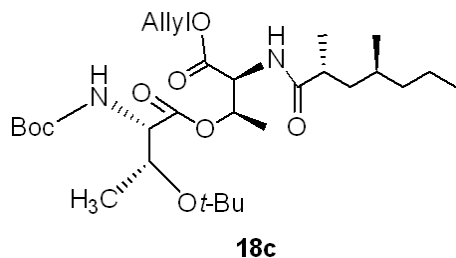

liushouxin-xh-SS-T-T

— 177.55  
 — 170.60  
 — 169.52  
 — 156.04  
 — 131.65  
 — 119.27

79.89  
 77.41  
 77.16  
 76.91  
 74.11  
 71.99  
 67.11  
 66.63  
 59.38  
 55.34

41.49  
 39.31  
 39.14  
 30.39  
 28.63  
 28.42  
 20.60  
 20.04  
 19.68  
 17.83  
 17.37  
 14.47

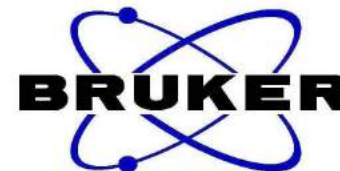

NAME 2021.03.11  
 EXPNO 13  
 PROCNO 1  
 Date\_ 20210318  
 Time 17.34  
 INSTRUM spect  
 PROBHD 5 mm PADUL 13C  
 PULPROG zgpg30  
 TD 32768  
 SOLVENT CDC13  
 NS 10240  
 DS 0  
 SWH 29761.904 Hz  
 FIDRES 0.908261 Hz  
 AQ 0.5505524 sec  
 RG 1150  
 DW 16.800 usec  
 DE 6.50 usec  
 TE 296.0 K  
 D1 2.00000000 sec  
 D11 0.03000000 sec  
 TD0 1

===== CHANNEL f1 =====

NUC1 13C  
 P1 12.00 usec  
 PL1 4.50 dB  
 PL1W 33.60015869 W  
 SFO1 125.7703643 MHz

===== CHANNEL f2 =====

CPDPRG2 waltz16  
 NUC2 1H  
 PCPD2 80.00 usec  
 PL2 2.00 dB  
 PL12 17.46 dB  
 PL13 17.46 dB  
 PL2W 16.79986763 W  
 PL12W 0.47786582 W  
 PL13W 0.47786582 W  
 SFO2 500.1320005 MHz  
 SI 32768  
 SF 125.7577767 MHz  
 WDW EM  
 SSB 0  
 LB 1.00 Hz  
 GB 0  
 PC 1.40

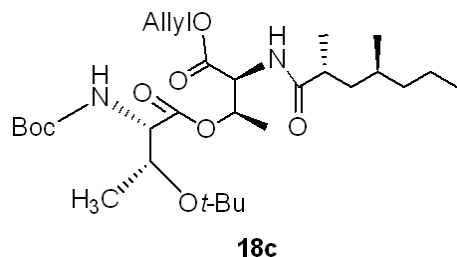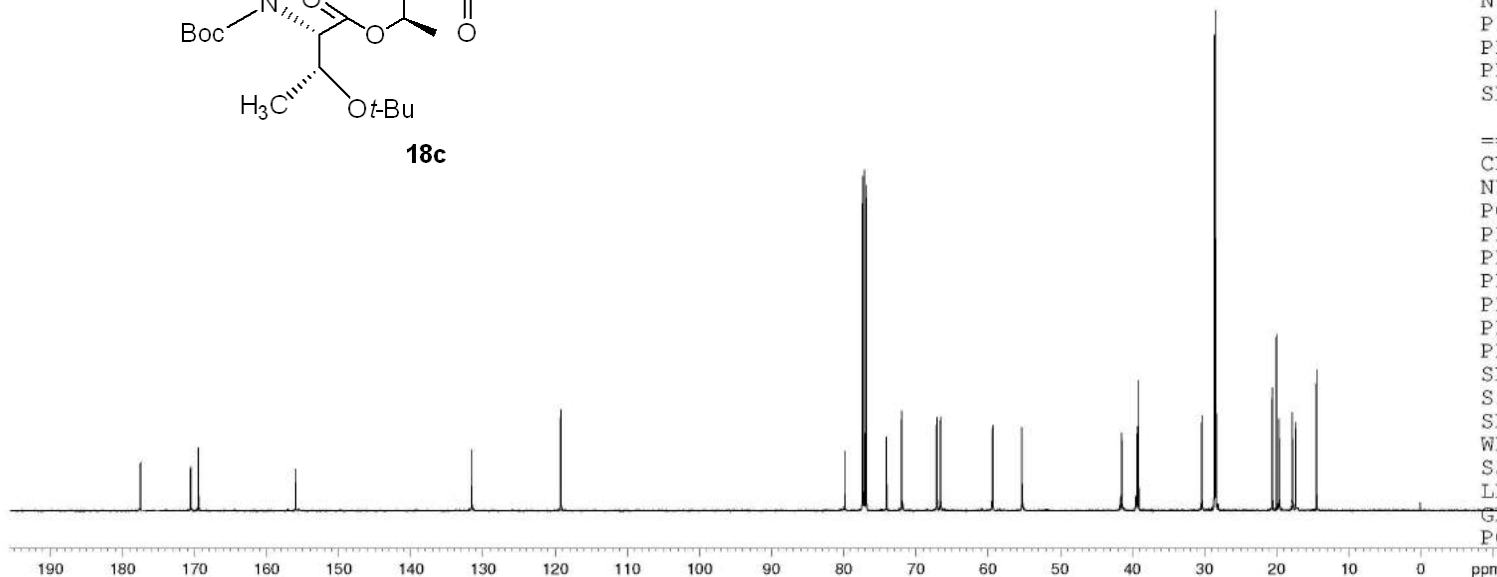





liushouxin XH-SR-3

177.94  
172.46  
170.69  
169.92

154.90

131.48  
130.49  
130.30  
129.17  
120.45  
120.28  
119.47

77.41  
77.16  
76.91  
71.57  
67.49  
66.81  
57.75  
55.51  
41.97  
39.67  
38.74  
37.60  
30.42  
28.43  
25.80  
20.08  
19.80  
19.78  
19.01  
18.32  
17.08  
14.45  
0.14  
-4.31

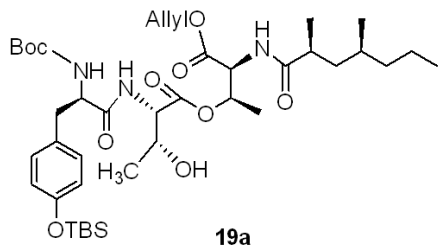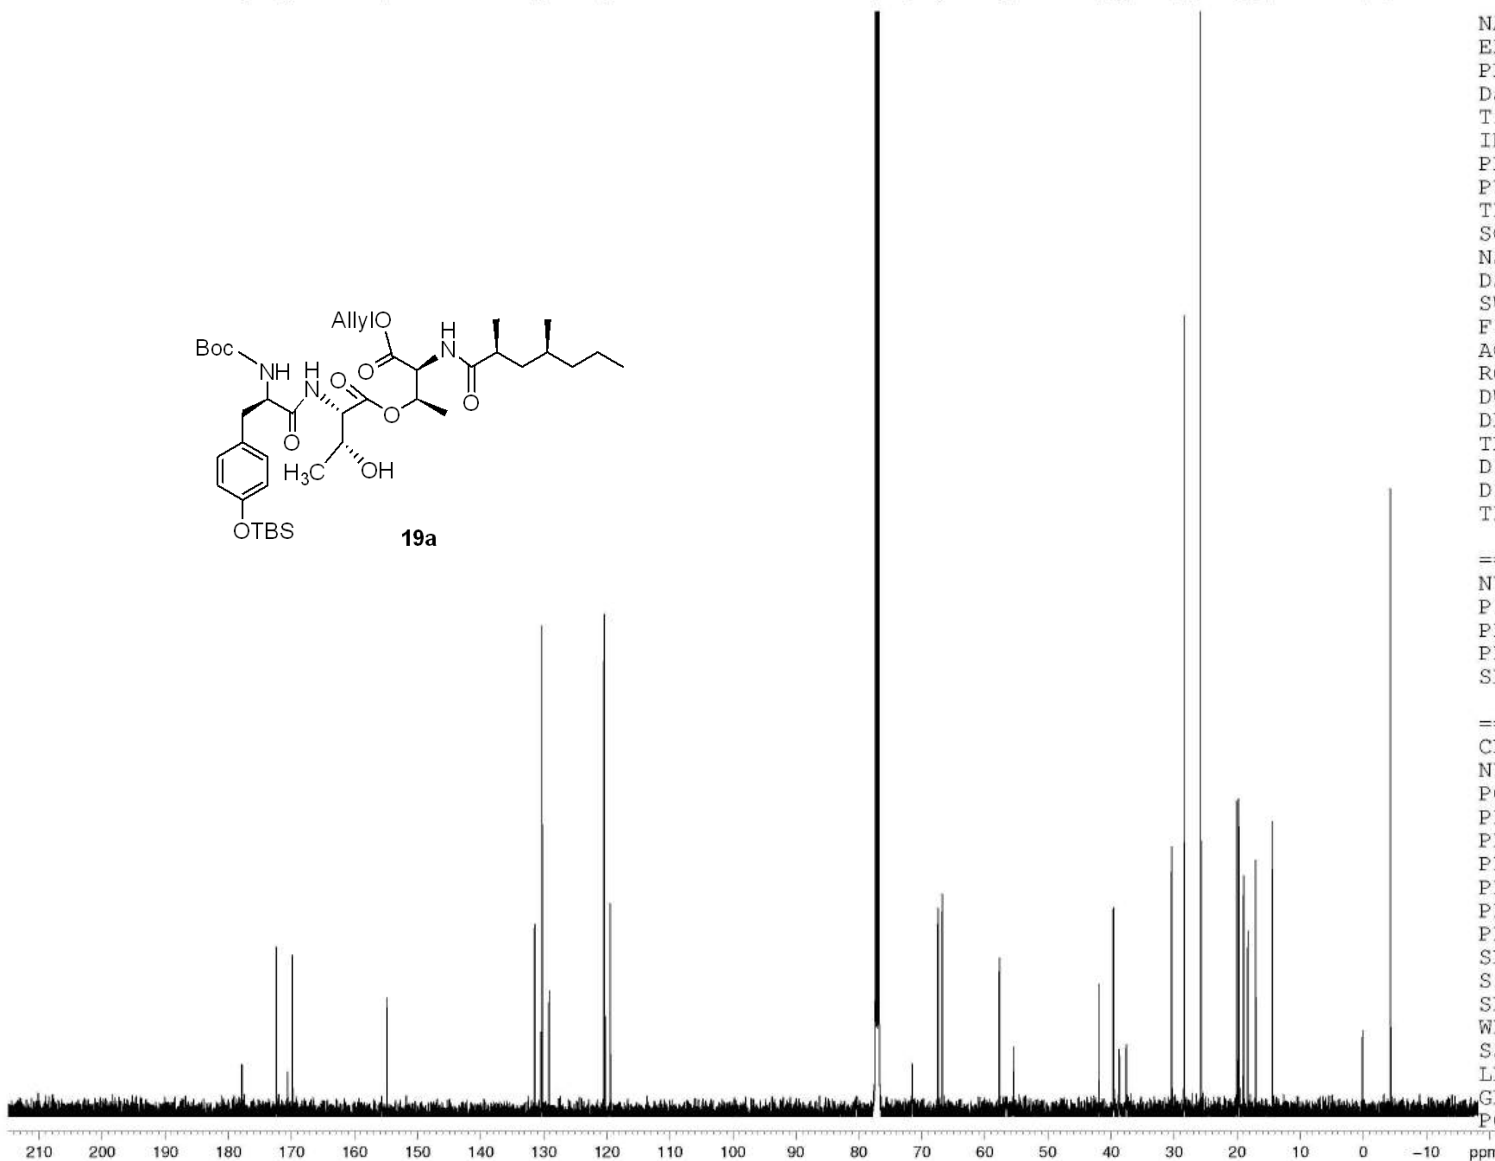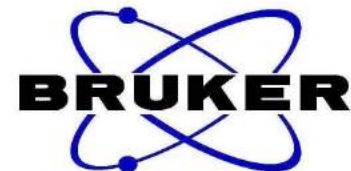

NAME 2021.05.07  
EXPNO 6  
PROCNO 1  
Date\_ 20210507  
Time 13.00  
INSTRUM spect  
PROBHD 5 mm PADUL 13C  
PULPROG zgpg30  
TD 32768  
SOLVENT CDC13  
NS 2048  
DS 0  
SWH 29761.904 Hz  
FIDRES 0.908261 Hz  
AQ 0.5505524 sec  
RG 912  
DW 16.800 usec  
DE 6.50 usec  
TE 298.6 K  
D1 2.00000000 sec  
D11 0.03000000 sec  
TD0 1

===== CHANNEL f1 =====  
NUC1 13C  
P1 12.00 usec  
PL1 4.50 dB  
PL1W 33.60015869 W  
SFO1 125.7703643 MHz

===== CHANNEL f2 =====  
CPDPRG2 waltz16  
NUC2 1H  
PCPD2 80.00 usec  
PL2 2.00 dB  
PL12 17.46 dB  
PL13 17.46 dB  
PL2W 16.79986763 W  
PL12W 0.47786582 W  
PL13W 0.47786582 W  
SFO2 500.1320005 MHz  
SI 32768  
SF 125.7577727 MHz  
WDW EM  
SSB 0  
LB 1.00 Hz  
GB 0  
PC 1.40

liushouxin-xh-RS-3

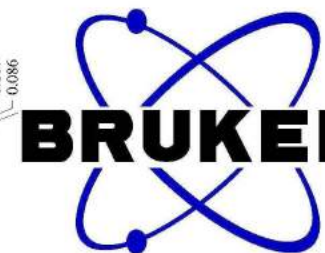

NAME 2020.12.29  
EXPNO 11  
PROCNO 1  
Date\_ 20201229  
Time 11.39  
INSTRUM spect  
PROBHD 5 mm PADUL 13C  
PULPROG zg30  
TD 65536  
SOLVENT CDCl3  
NS 8  
DS 0  
SWH 10000.000  
FIDRES 0.152588  
AQ 3.2768500  
RG 80.6  
DW 50.000  
DE 6.50  
TE 298.0  
D1 1.00000000  
TD0 1

===== CHANNEL f1 =====  
NUC1 1H  
P1 13.50  
PL1 2.00  
PL1W 16.79986763  
SFO1 500.1340010  
SI 32768  
SF 500.1300227  
WDW EM  
SSB 0  
LB 0.30  
GB 0  
PC 1.00

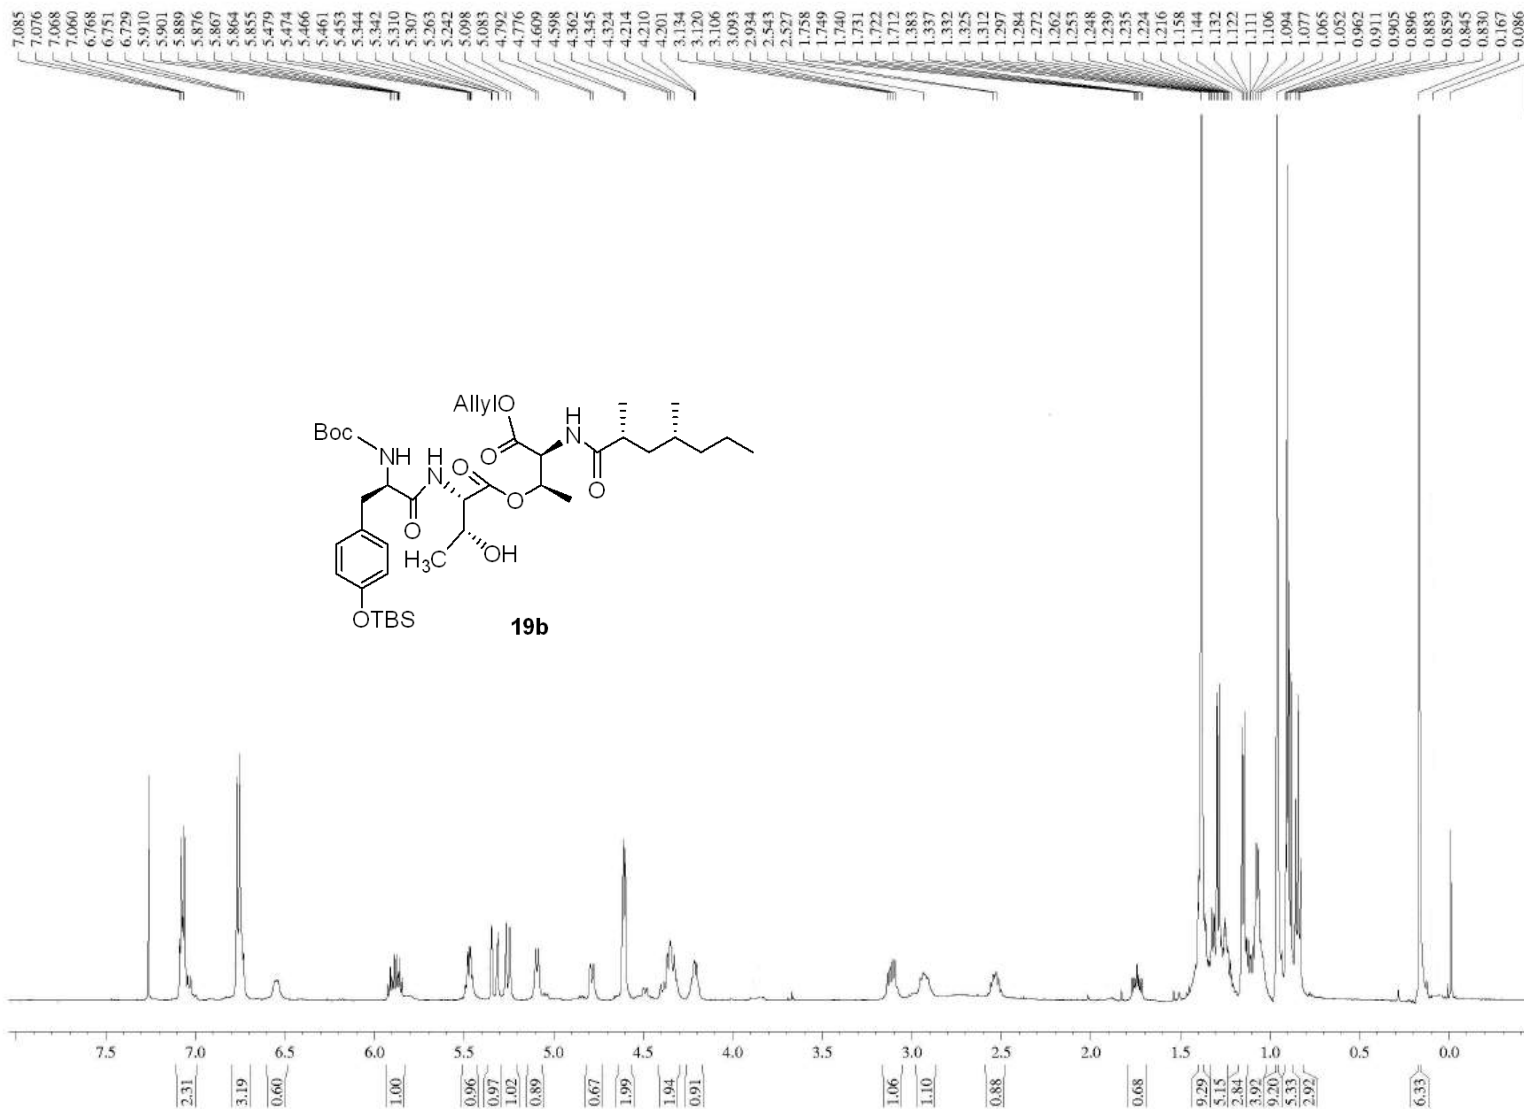

liushouxin-xh-RS-3

177.67  
172.45  
172.39  
170.61  
169.97  
169.85

154.81  
154.79

131.45  
130.33  
130.30  
129.31  
120.38  
119.50

77.41  
77.16  
76.91

67.49  
66.85

57.67  
55.32

41.68  
39.66  
39.04

30.64  
28.38  
25.78

20.07  
19.72  
19.61  
19.14

18.89  
18.29  
17.14  
14.41

0.12  
-4.33



NAME 2021.03.11  
EXPNO 10  
PROCNO 1  
Date\_ 20210317  
Time 9.24  
INSTRUM spect  
PROBHD 5 mm PADUL 13C  
PULPROG zgpg30  
TD 32768  
SOLVENT CDC13  
NS 10240  
DS 0  
SWH 29761.904 Hz  
FIDRES 0.908261 Hz  
AQ 0.5505524 sec  
RG 1150  
DW 16.800 usec  
DE 6.50 usec  
TE 295.2 K  
D1 2.00000000 sec  
D11 0.03000000 sec  
TD0 1

===== CHANNEL f1 =====  
NUC1 13C  
P1 12.00 usec  
PL1 4.50 dB  
PL1W 33.60015869 W  
SFO1 125.7703643 MHz

===== CHANNEL f2 =====  
CPDPRG2 waltz16  
NUC2 1H  
PCPD2 80.00 usec  
PL2 2.00 dB  
PL12 17.46 dB  
PL13 17.46 dB  
PL2W 16.79986763 W  
PL12W 0.47786582 W  
PL13W 0.47786582 W  
SFO2 500.1320005 MHz  
SI 32768  
SF 125.7577756 MHz  
WDW EM  
SSB 0  
LB 1.00 Hz  
GB 0  
PC 1.40

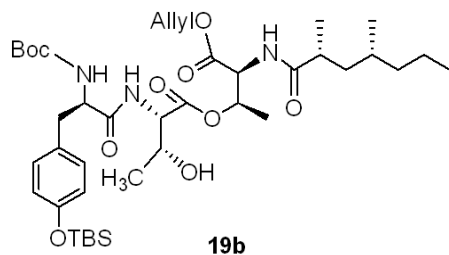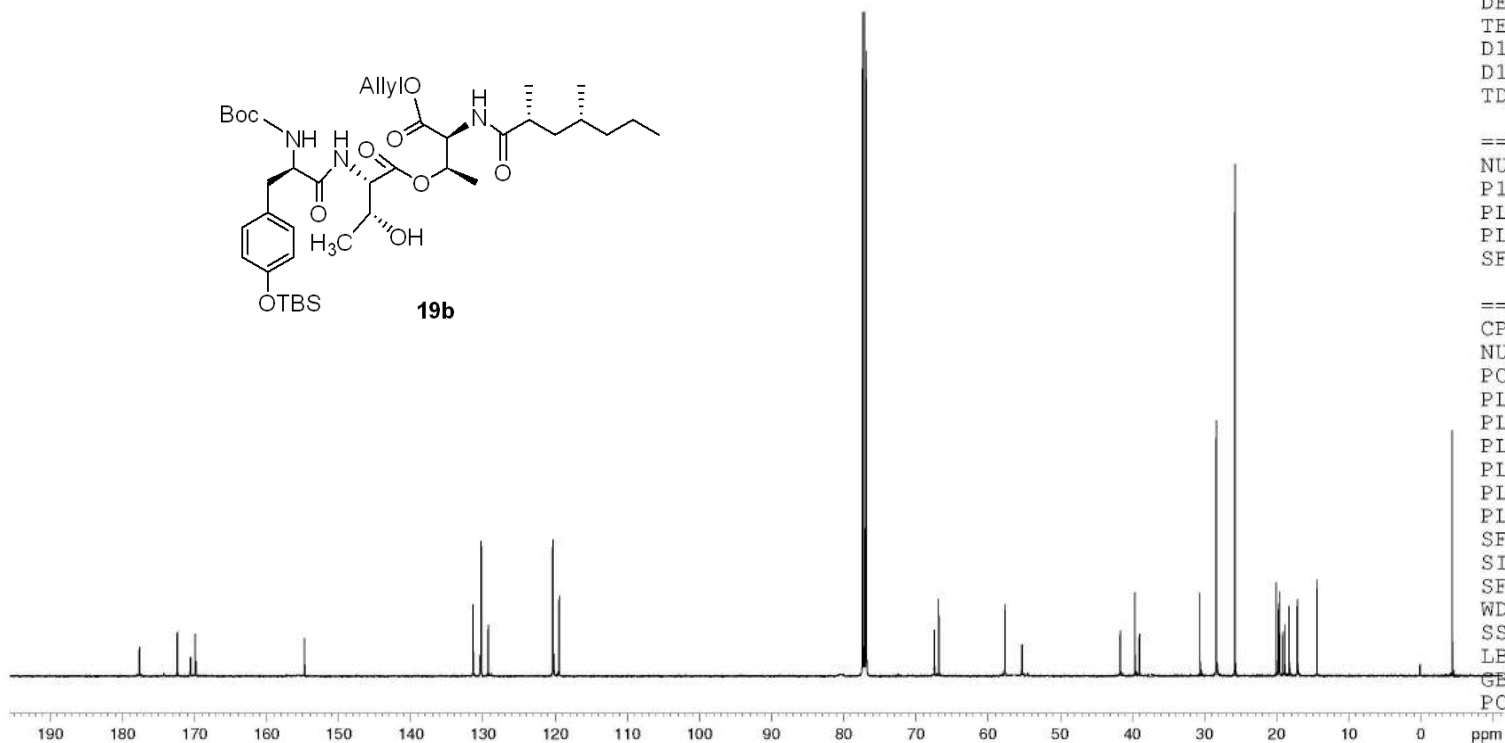

xh-ss-3

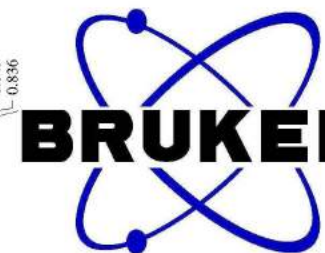

NAME 2020.12.18  
EXPNO 12  
PROCNO 1  
Date\_ 20201218  
Time 19.29  
INSTRUM spect  
PROBHD 5 mm PADUL 13C  
PULPROG zg30  
TD 65536  
SOLVENT CDCl3  
NS 16  
DS 0  
SWH 5000.000  
FIDRES 0.076294  
AQ 6.5536499  
RG 90.5  
DW 100.000  
DE 6.50  
TE 298.0  
D1 1.00000000  
TD0 1

===== CHANNEL f1 =====  
NUC1 1H  
P1 13.50  
PL1 2.00  
PL1W 16.79986763  
SFO1 500.1322506  
SI 32768  
SF 500.1300228  
WDW EM  
SSB 0  
LB 0.30  
GB 0  
PC 1.00

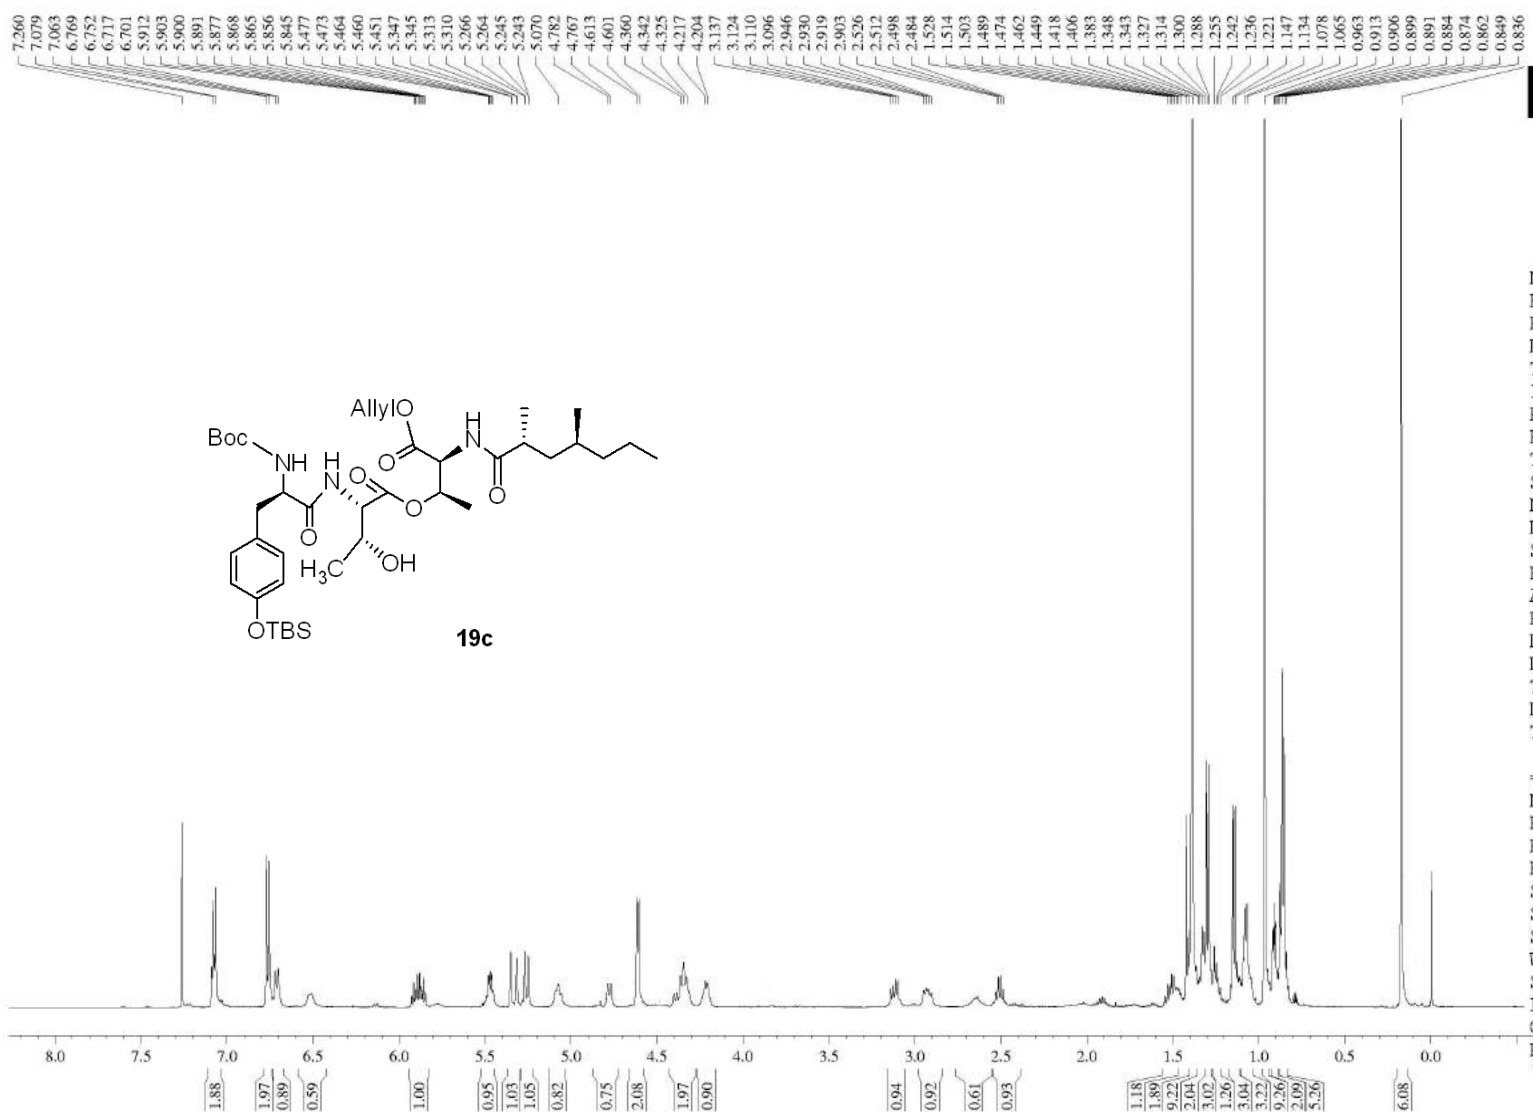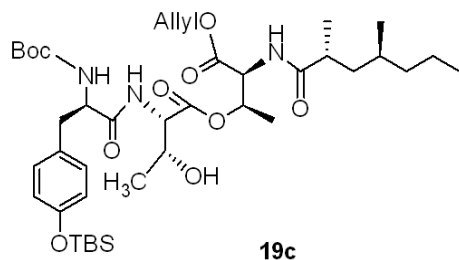



liushouxin-xh-SS-3

178.01  
172.44  
172.37  
170.55  
169.99  
169.85

154.80

131.45  
130.30  
129.30  
120.37  
119.50

80.40  
77.42  
77.16  
76.91  
71.67  
67.42  
66.83

57.64  
55.38

41.30  
39.44  
38.95  
37.53  
30.43  
28.39  
25.77  
20.10  
19.73  
19.61  
19.13  
18.29  
17.95  
17.15  
14.46

-4.34



NAME 2021.03.11  
EXPNO 16  
PROCNO 1  
Date\_ 20210322  
Time 13.01  
INSTRUM spect  
PROBHD 5 mm PADUL 13C  
PULPROG zgpg30  
TD 32768  
SOLVENT CDC13  
NS 10240  
DS 0  
SWH 29761.904 Hz  
FIDRES 0.908261 Hz  
AQ 0.5505524 sec  
RG 1820  
DW 16.800 usec  
DE 6.50 usec  
TE 297.3 K  
D1 2.00000000 sec  
D11 0.03000000 sec  
TD0 1

==== CHANNEL f1 =====  
NUC1 13C  
P1 12.00 usec  
PL1 4.50 dB  
PL1W 33.60015869 W  
SFO1 125.7703643 MHz

==== CHANNEL f2 =====  
CPDPRG2 waltz16  
NUC2 1H  
PCPD2 80.00 usec  
PL2 2.00 dB  
PL12 17.46 dB  
PL13 17.46 dB  
PL2W 16.79986763 W  
PL12W 0.47786582 W  
PL13W 0.47786582 W  
SFO2 500.1320005 MHz  
SI 32768  
SF 125.7577758 MHz  
WDW EM  
SSB 0  
LB 1.00 Hz  
GB 0  
PC 1.40

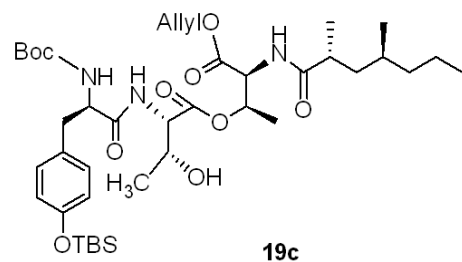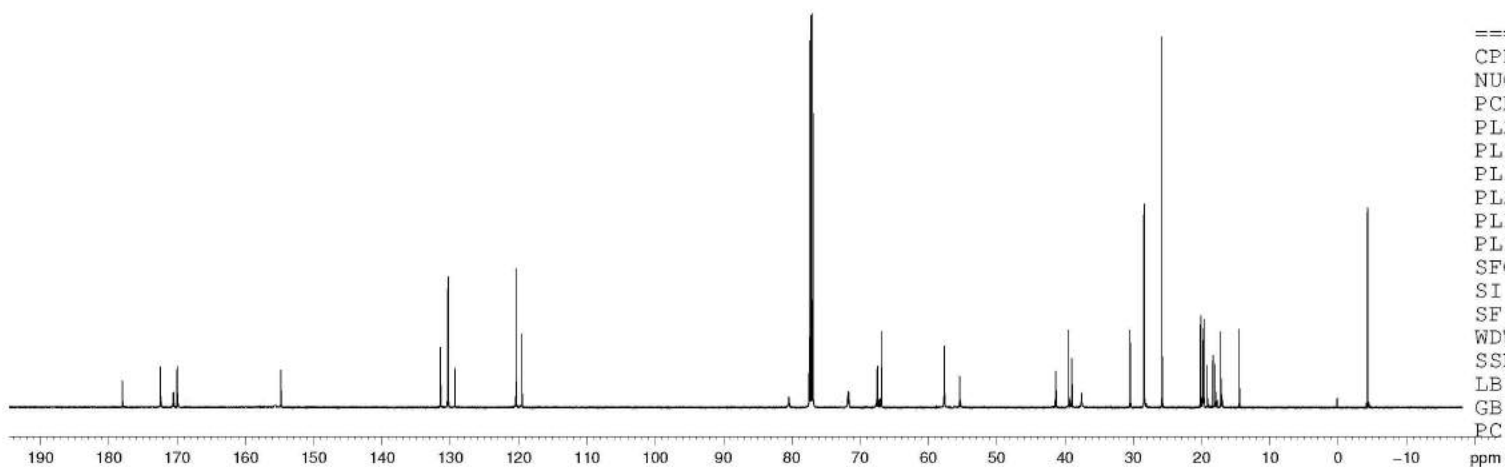

liushouxin-xh-SR-3-H2O

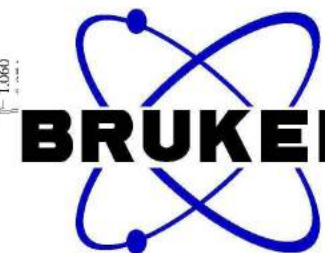

NAME 2021.05.06  
 EXPNO 15  
 PROCNO 1  
 Date\_ 20210506  
 Time 16.25  
 INSTRUM spect  
 PROBHD 5 mm PADUL 13C  
 PULPROG zg30  
 TD 65536  
 SOLVENT CDCl3  
 NS 32  
 DS 0  
 SWH 10000.000  
 FIDRES 0.152588  
 AQ 3.2768500  
 RG 181  
 DW 50.000  
 DE 6.50  
 TE 296.9  
 D1 1.00000000  
 TD0 1

===== CHANNEL f1 =====  
 NUC1 1H  
 P1 13.50  
 PL1 2.00  
 PL1W 16.79986763  
 SFO1 500.1345012  
 SI 32768  
 SF 500.1300207  
 WDW EM  
 SSB 0  
 LB 0.30  
 GB 0  
 PC 1.00

7.264  
7.199  
7.109  
7.092  
6.878  
6.787  
6.783  
6.770  
5.912  
5.900  
5.891  
5.888  
5.879  
5.866  
5.856  
5.854  
5.845  
5.833  
5.454  
5.325  
5.323  
5.291  
5.288  
5.226  
5.206  
4.939  
4.917  
4.911  
4.899  
4.893  
4.636  
4.624  
4.450  
4.438

3.093  
3.081  
3.069  
3.054  
3.041  
2.648  
1.795  
1.785  
1.776  
1.767  
1.758  
1.749  
1.739  
1.691  
1.676  
1.661  
1.427  
1.353  
1.348  
1.338  
1.333  
1.327  
1.314  
1.288  
1.275  
1.262  
1.251  
1.245  
1.235  
1.224  
1.214  
1.157  
1.143  
1.113  
1.105  
1.097  
1.086  
1.076  
1.065  
1.060

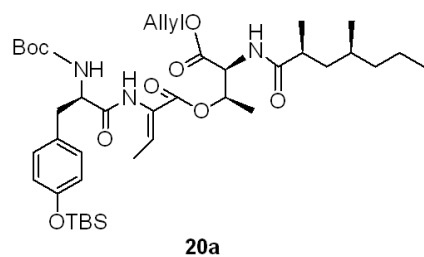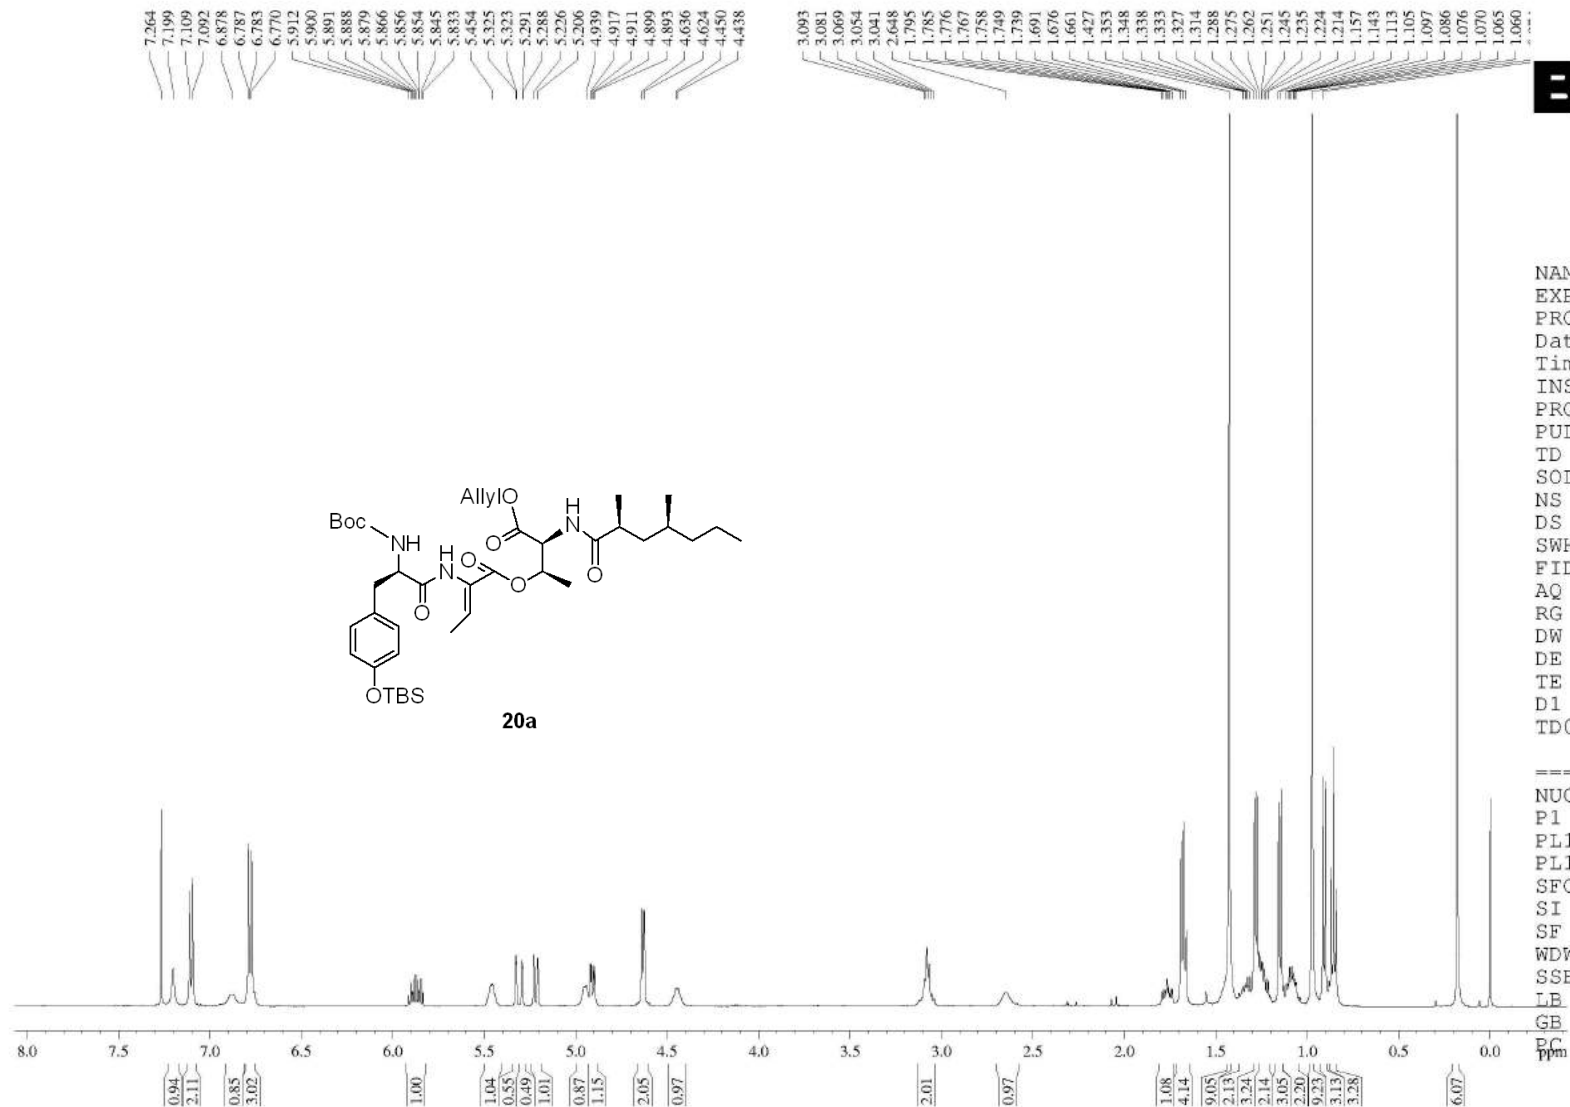

liushouxin XH-SR-3-h20



177.82  
170.48  
169.68  
162.96  
154.95  
135.73  
131.72  
130.49  
130.44  
128.98  
126.33  
120.52  
119.33  
119.24

80.77  
77.42  
77.16  
76.91  
72.23  
66.58  
55.47  
41.96  
39.83  
38.77  
36.59  
30.51  
28.38  
25.80  
20.10  
19.73  
19.30  
18.33  
16.92  
14.47  
14.41  
-4.30

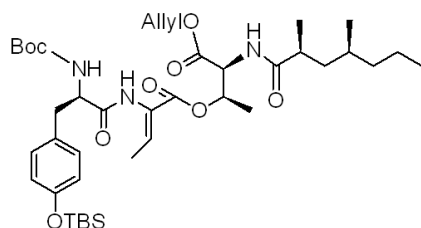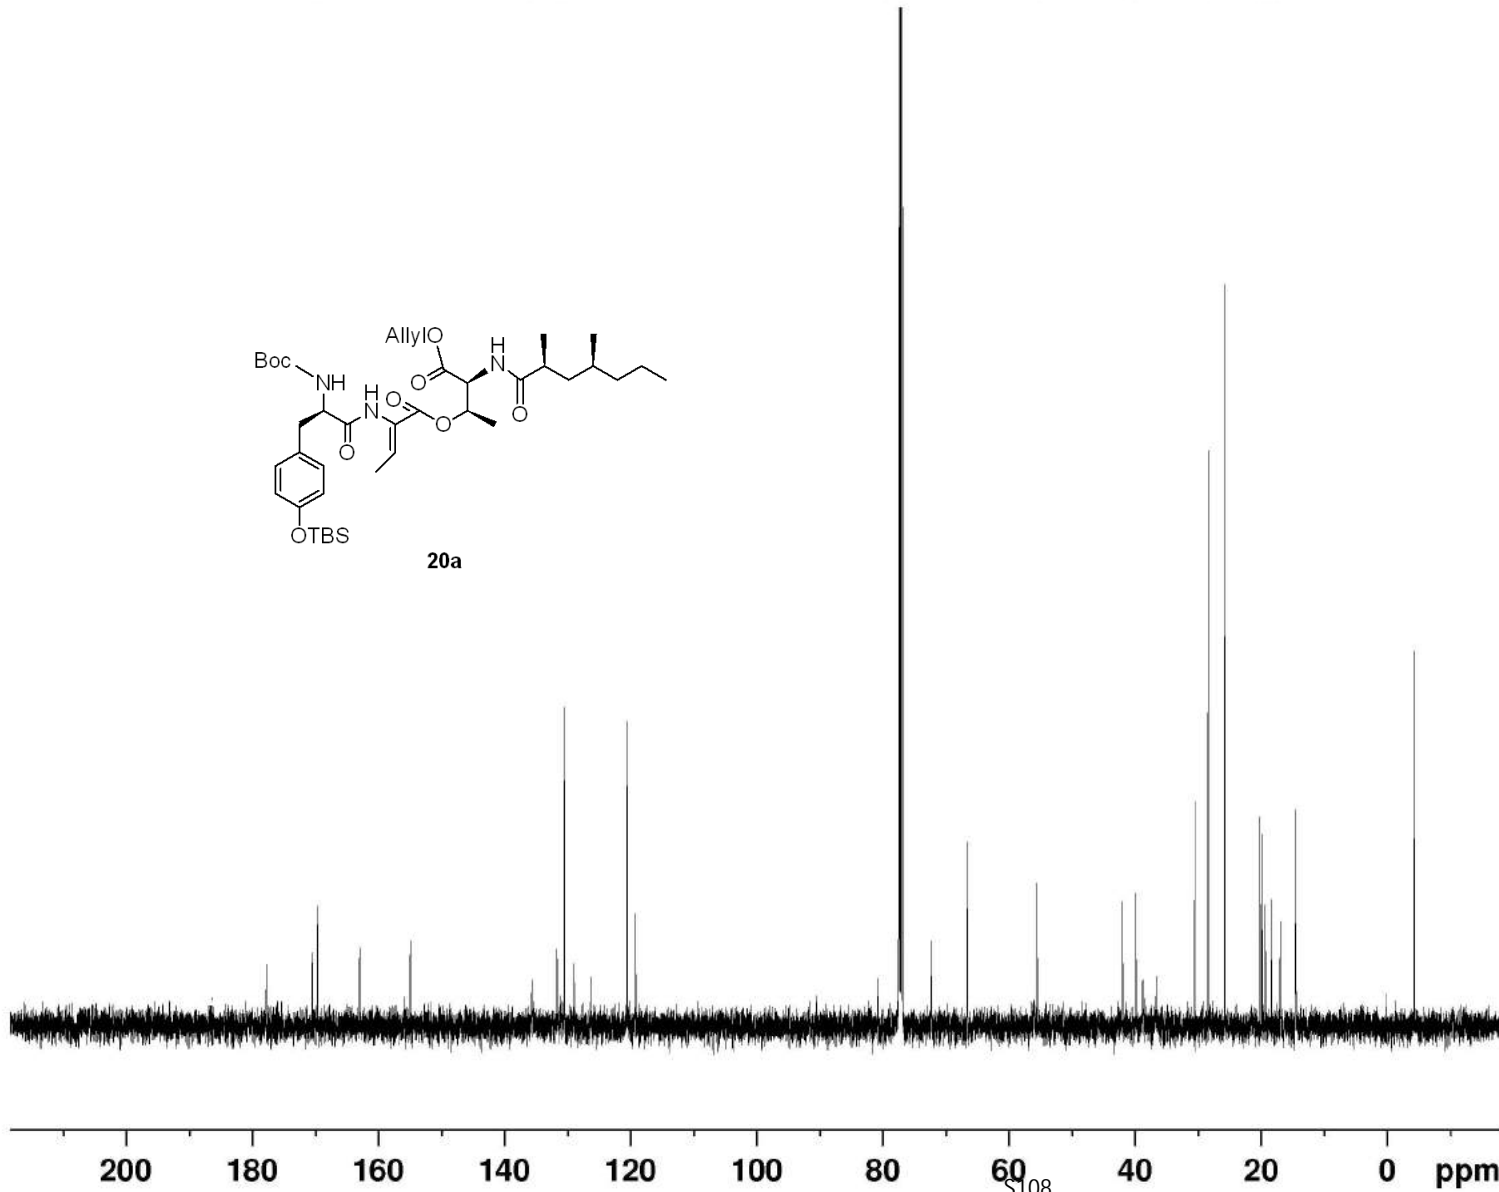

```
NAME 2021.05.07
EXPNO 7
PROCNO 1
Date_ 20210507
Time 17.37
INSTRUM spect
PROBHD 5 mm PADUL 13C
PULPROG zgpg30
TD 32768
SOLVENT CDC13
NS 262
DS 0
SWH 29761.904 Hz
FIDRES 0.908261 Hz
AQ 0.5505524 sec
RG 912
DW 16.800 usec
DE 6.50 usec
TE 298.8 K
D1 2.00000000 sec
D11 0.03000000 sec
TDO 1

===== CHANNEL f1 =====
NUC1 13C
P1 12.00 usec
PL1 4.50 dB
PL1W 33.60015869 W
SFO1 125.7703643 MHz

===== CHANNEL f2 =====
CPDPRG2 waltz16
NUC2 1H
PCPD2 80.00 usec
PL2 2.00 dB
PL12 17.46 dB
PL13 17.46 dB
PL2W 16.79986763 W
PL12W 0.47786582 W
PL13W 0.47786582 W
SFO2 500.1320005 MHz
SI 32768
SF 125.7577731 MHz
WDW EM
SSB 0
LB 1.00 Hz
GB 0
PC 1.40
```



liushouxin-xh-RS-3-H2O

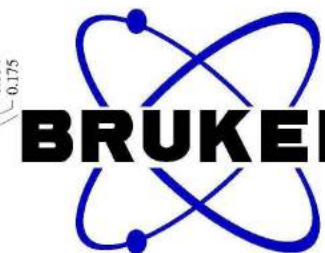

NAME 2020.12.29  
 EXPNO 12  
 PROCNO 1  
 Date\_ 20201229  
 Time 11.51  
 INSTRUM spect  
 PROBHD 5 mm PADUL 13C  
 PULPROG zg30  
 TD 65536  
 SOLVENT CDCl3  
 NS 32  
 DS 0  
 SWH 10000.000  
 FIDRES 0.152588  
 AQ 3.2768500  
 RG 203  
 DW 50.000  
 DE 6.50  
 TE 298.0  
 D1 1.00000000  
 TD0 1

===== CHANNEL f1 =====  
 NUC1 1H  
 P1 13.50  
 PL1 2.00  
 PL1W 16.79986763  
 SFO1 500.1340010  
 SI 32768  
 SF 500.1300226  
 WDW EM  
 SSB 0  
 LB 0.30  
 GB 0  
 PC 1.00

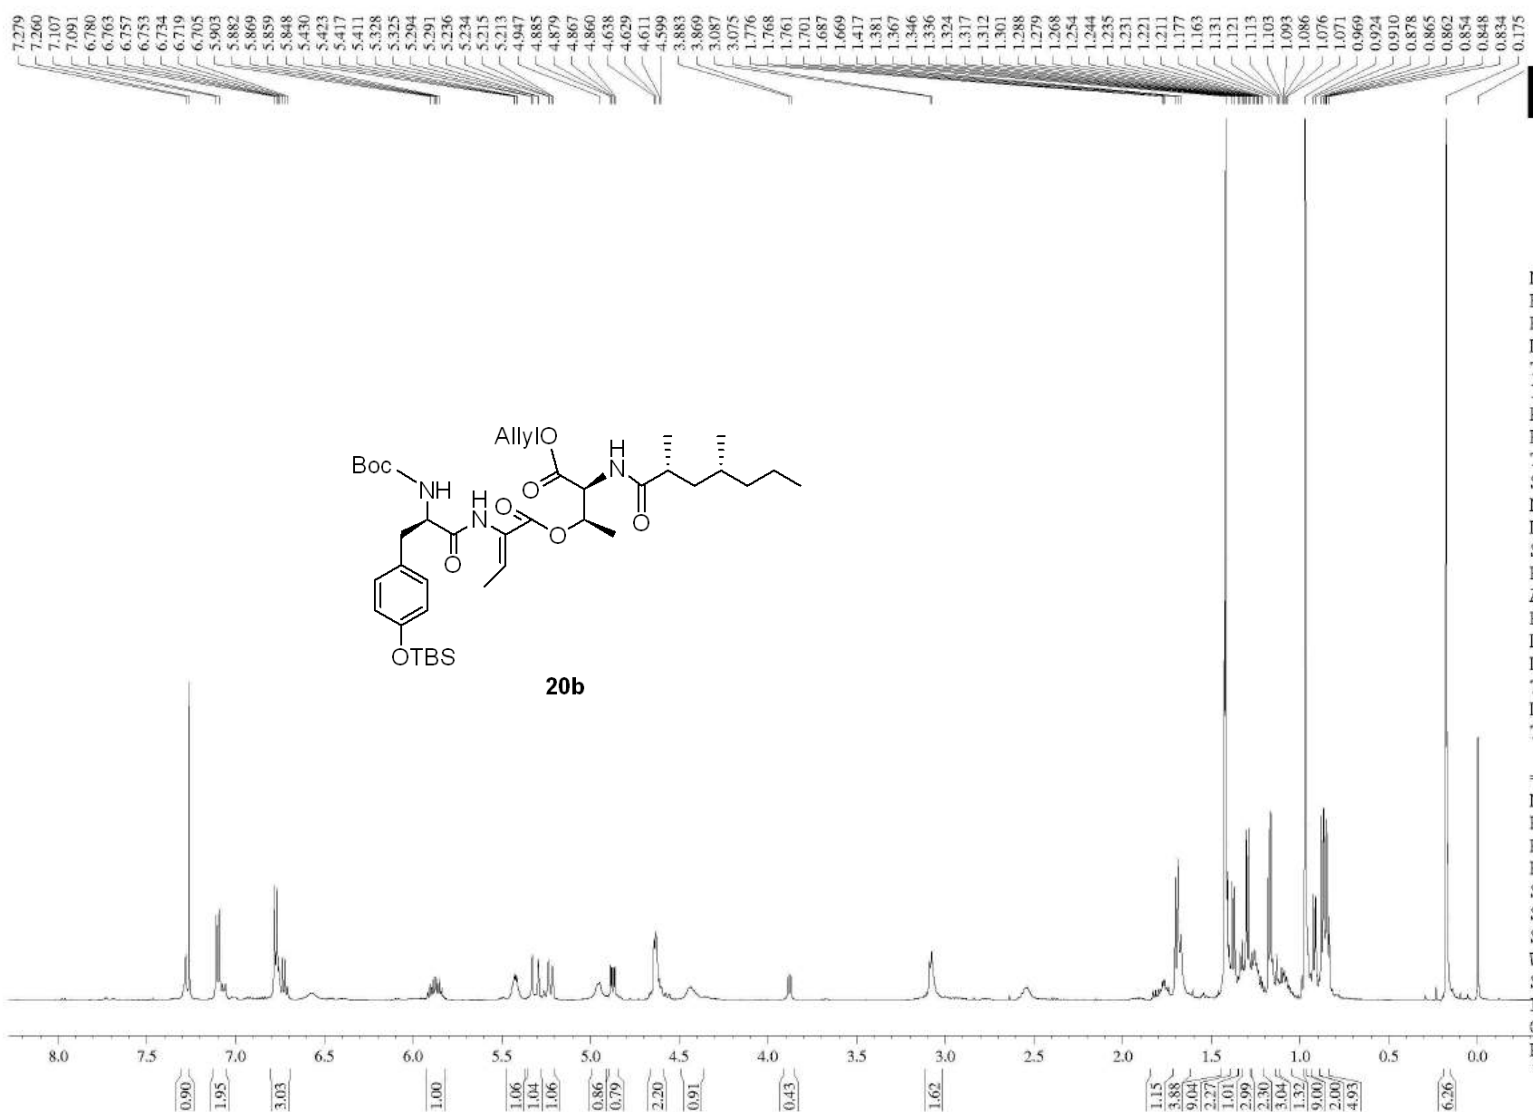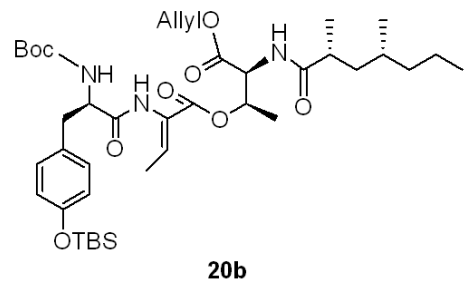

liushouxin-xh-RS--3-h2O

177.57  
170.47  
169.74  
163.06  
154.90  
135.10  
131.65  
130.45  
130.36  
130.30  
129.08  
120.49  
120.43  
120.31  
119.27

77.41  
77.16  
76.90  
72.23  
66.62  
55.56  
41.60  
39.76  
39.10  
30.69  
28.40  
25.80  
20.09  
19.70  
19.17  
19.09  
18.32  
17.05  
16.88  
14.44  
0.13  
-4.31

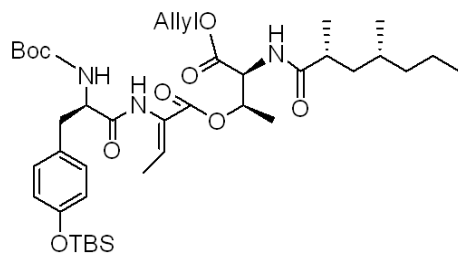

20b

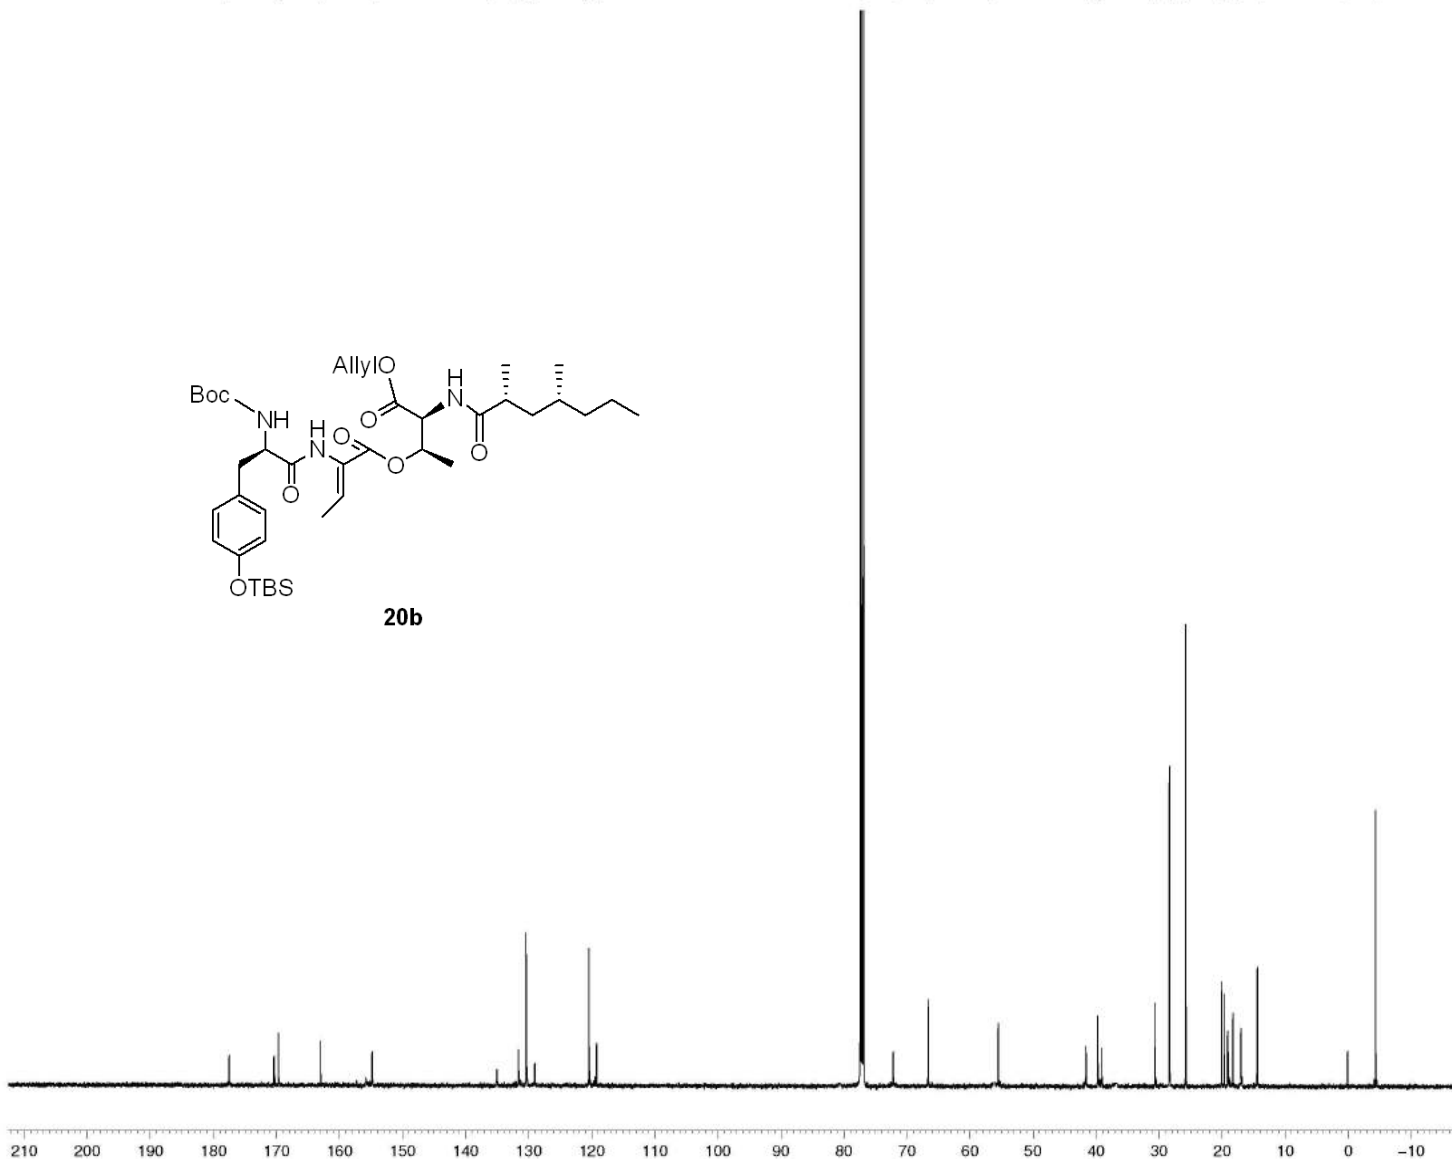

NAME 2021.03.11  
EXPNO 15  
PROCNO 1  
Date\_ 20210319  
Time 17.05  
INSTRUM spect  
PROBHD 5 mm PADUL 13C  
PULPROG zgpg30  
TD 32768  
SOLVENT CDC13  
NS 10240  
DS 0  
SWH 29761.904 Hz  
FIDRES 0.908261 Hz  
AQ 0.5505524 sec  
RG 912  
DW 16.800 usec  
DE 6.50 usec  
TE 296.6 K  
D1 2.00000000 sec  
D11 0.03000000 sec  
TD0 1

===== CHANNEL f1 =====  
NUC1 13C  
P1 12.00 usec  
PL1 4.50 dB  
PL1W 33.60015869 W  
SFO1 125.7703643 MHz

===== CHANNEL f2 =====  
CPDPRG2 waltz16  
NUC2 1H  
PCPD2 80.00 usec  
PL2 2.00 dB  
PL12 17.46 dB  
PL13 17.46 dB  
PL2W 16.79986763 W  
PL12W 0.47786582 W  
PL13W 0.47786582 W  
SFO2 500.1320005 MHz  
SI 32768  
SF 125.7577740 MHz  
WDW EM  
SSB 0  
LB 1.00 Hz  
GB 0  
PC 1.40

xh-ss-3-h2o

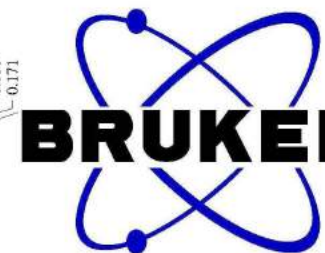

NAME 2020.12.23  
EXPNO 23  
PROCNO 1  
Date\_ 20201223  
Time 17.26  
INSTRUM spect  
PROBHD 5 mm PADUL 13C  
PULPROG zg30  
TD 65536  
SOLVENT CDCl3  
NS 16  
DS 0  
SWH 10000.000  
FIDRES 0.152588  
AQ 3.2768500  
RG 80.6  
DW 50.000  
DE 6.50  
TE 298.0  
D1 1.00000000  
TD0 1

==== CHANNEL f1 ===  
NUC1 1H  
P1 13.50  
PL1 2.00  
PL1W 16.79986763  
SFO1 500.1340010  
SI 32768  
SF 500.1300227  
WDW EM  
SSB 0  
LB 0.30  
GB 0  
PC 1.00

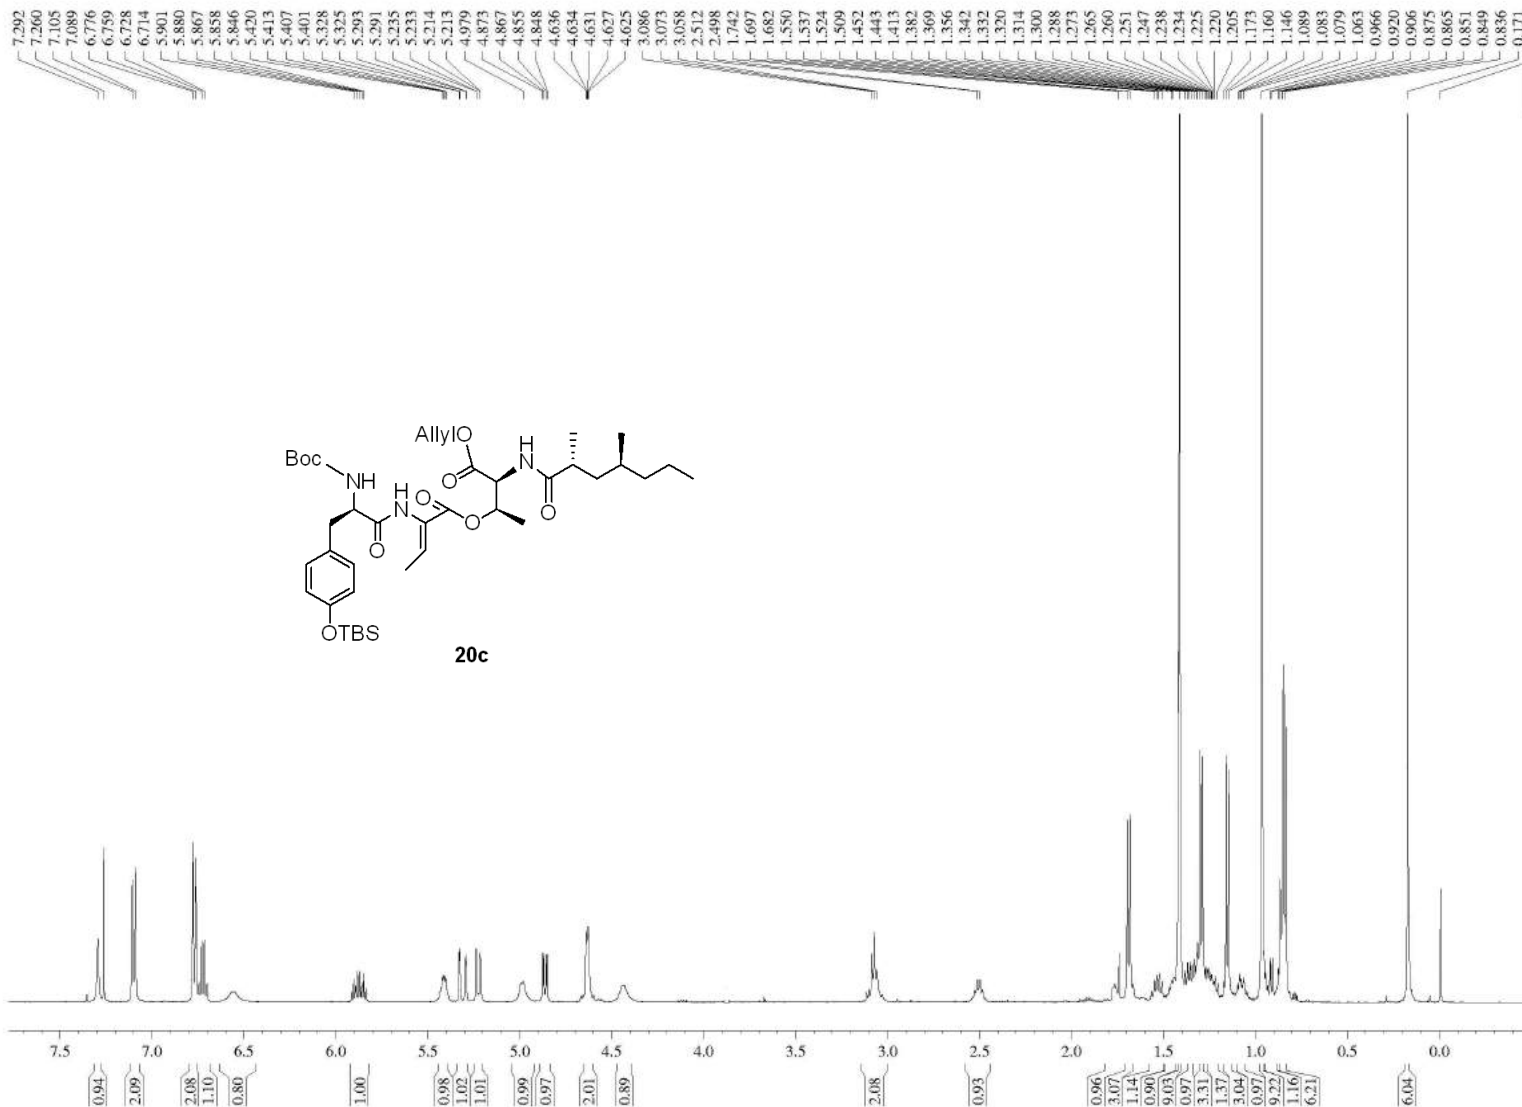

liushouxin-xh-SS-3-h2O

177.89  
170.46  
169.74  
163.05  
154.87  
135.06  
131.61  
130.43  
129.09  
126.24  
120.46  
119.29

80.62  
77.41  
77.16  
76.90  
72.22  
66.60  
55.60  
41.27  
39.41  
39.02  
36.87  
30.50  
28.39  
25.78  
20.10  
20.07  
19.73  
19.15  
18.30  
18.23  
17.07  
14.47  
14.43  
0.11  
-4.33



NAME 2021.03.11  
EXPNO 17  
PROCNO 1  
Date\_ 20210323  
Time 16.52  
INSTRUM spect  
PROBHD 5 mm PADUL 13C  
PULPROG zgpg30  
TD 32768  
SOLVENT CDC13  
NS 10240  
DS 0  
SWH 29761.904 Hz  
FIDRES 0.908261 Hz  
AQ 0.5505524 sec  
RG 1820  
DW 16.800 usec  
DE 6.50 usec  
TE 296.4 K  
D1 2.00000000 sec  
D11 0.03000000 sec  
TD0 1

==== CHANNEL f1 =====  
NUC1 13C  
P1 12.00 usec  
PL1 4.50 dB  
PL1W 33.60015869 W  
SFO1 125.7703643 MHz

==== CHANNEL f2 =====  
CPDPRG2 waltz16  
NUC2 1H  
PCPD2 80.00 usec  
PL2 2.00 dB  
PL12 17.46 dB  
PL13 17.46 dB  
PL2W 16.79986763 W  
PL12W 0.47786582 W  
PL13W 0.47786582 W  
SFO2 500.1320005 MHz  
SI 32768  
SF 125.7577758 MHz  
WDW EM  
SSB 0  
LB 1.00 Hz  
GB 0  
PC 1.40

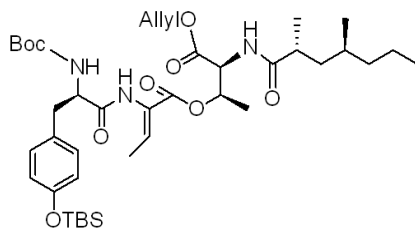

20c

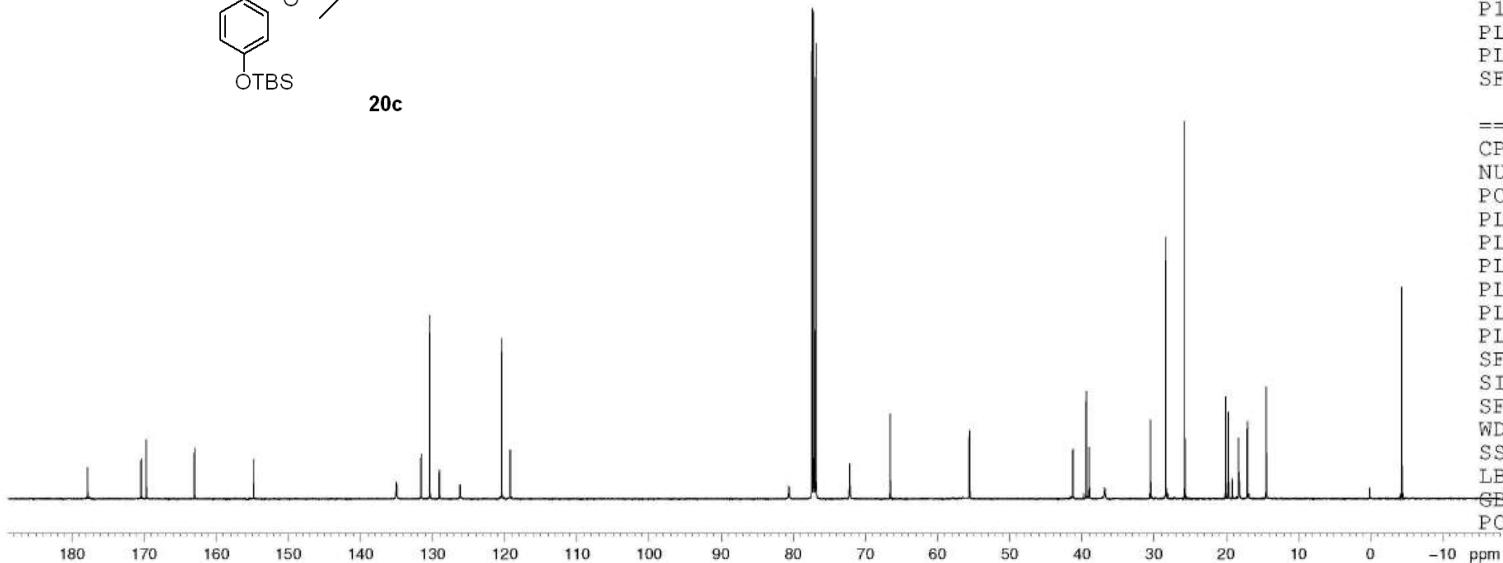

liushouxin-xh-SR-4

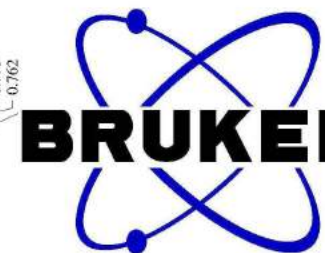

NAME 2021.03.11  
 EXPNO 1  
 PROCNO 2  
 Date\_ 20210630  
 Time 17.41  
 INSTRUM spect  
 PROBHD 5 mm PADUL 13C  
 PULPROG zg30  
 TD 65536  
 SOLVENT CDCl3  
 NS 4  
 DS 0  
 SWH 10000.000  
 FIDRES 0.152588  
 AQ 3.2768500  
 RG 80.6  
 DW 50.000  
 DE 6.50  
 TE 296.4  
 D1 1.00000000  
 TD0 1

===== CHANNEL f1 =====  
 NUC1 1H  
 P1 13.50  
 PL1 2.00  
 PL1W 16.79986763  
 SFO1 500.1340010  
 SI 32768  
 SF 500.1300227  
 WDW EM  
 SSB 0  
 LB 0.30  
 GB 0  
 PC 1.00

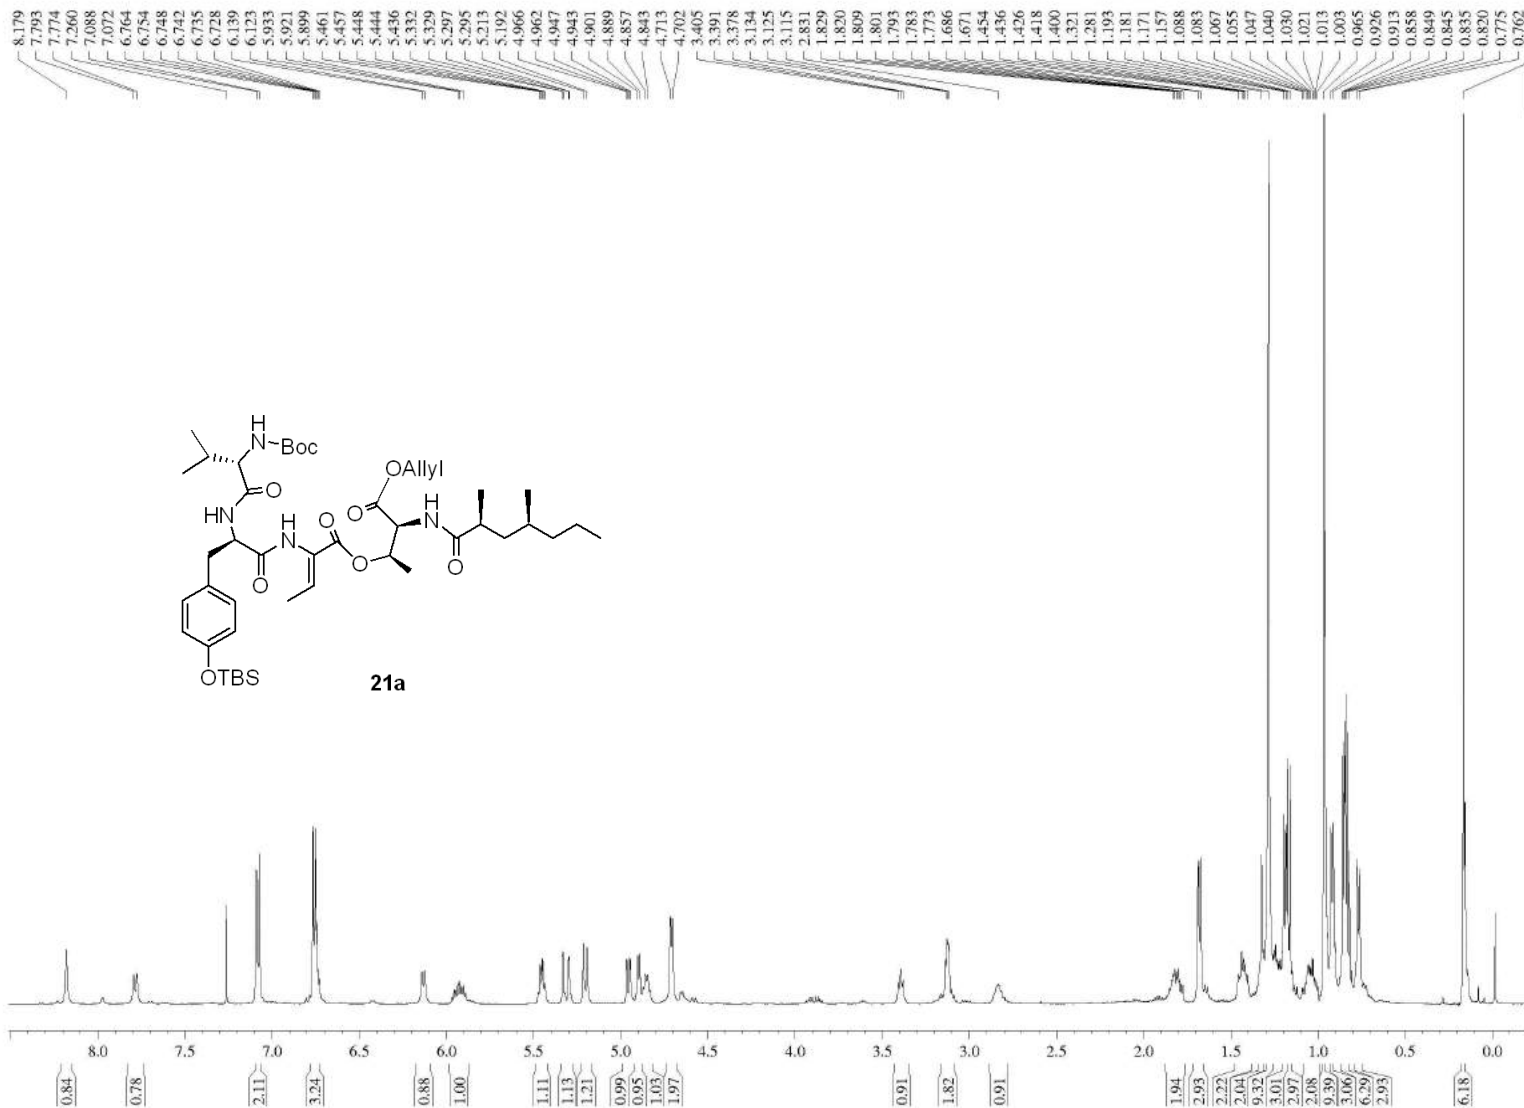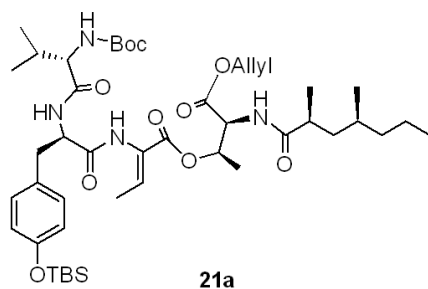



liushouxin-xh-SR-4

178.08  
172.35  
170.62  
169.45  
163.29  
156.75  
155.03  
135.49  
132.22  
130.34  
129.04  
127.90  
120.59  
118.56

80.79  
77.41  
77.16  
76.91  
72.46  
66.60  
62.32  
55.09  
54.25  
41.56  
39.93  
38.15  
35.93  
30.51  
29.93  
28.34  
28.29  
25.78  
20.11  
19.74  
19.63  
19.22  
19.19  
18.96  
18.31  
16.75  
14.47  
13.48  
0.11  
-4.33

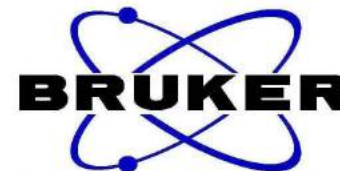

NAME 2021.03.11  
EXPNO 4  
PROCNO 1  
Date\_ 20210312  
Time 15.13  
INSTRUM spect  
PROBHD 5 mm PADUL 13C  
PULPROG zgpg30  
TD 32768  
SOLVENT CDC13  
NS 10240  
DS 0  
SWH 29761.904 Hz  
FIDRES 0.908261 Hz  
AQ 0.5505524 sec  
RG 2050  
DW 16.800 usec  
DE 6.50 usec  
TE 296.5 K  
D1 2.00000000 sec  
D11 0.03000000 sec  
TD0 1

==== CHANNEL f1 =====  
NUC1 13C  
P1 12.00 usec  
PL1 4.50 dB  
PL1W 33.60015869 W  
SFO1 125.7703643 MHz

==== CHANNEL f2 =====  
CPDPRG2 waltz16  
NUC2 1H  
PCPD2 80.00 usec  
PL2 2.00 dB  
PL12 17.46 dB  
PL13 17.46 dB  
PL2W 16.79986763 W  
PL12W 0.47786582 W  
PL13W 0.47786582 W  
SFO2 500.1320005 MHz  
SI 32768  
SF 125.7577757 MHz  
WDW EM  
SSB 0  
LB 1.00 Hz  
GB 0  
PC 1.40

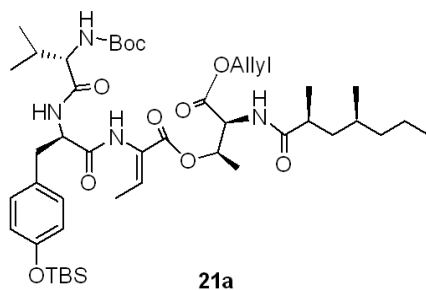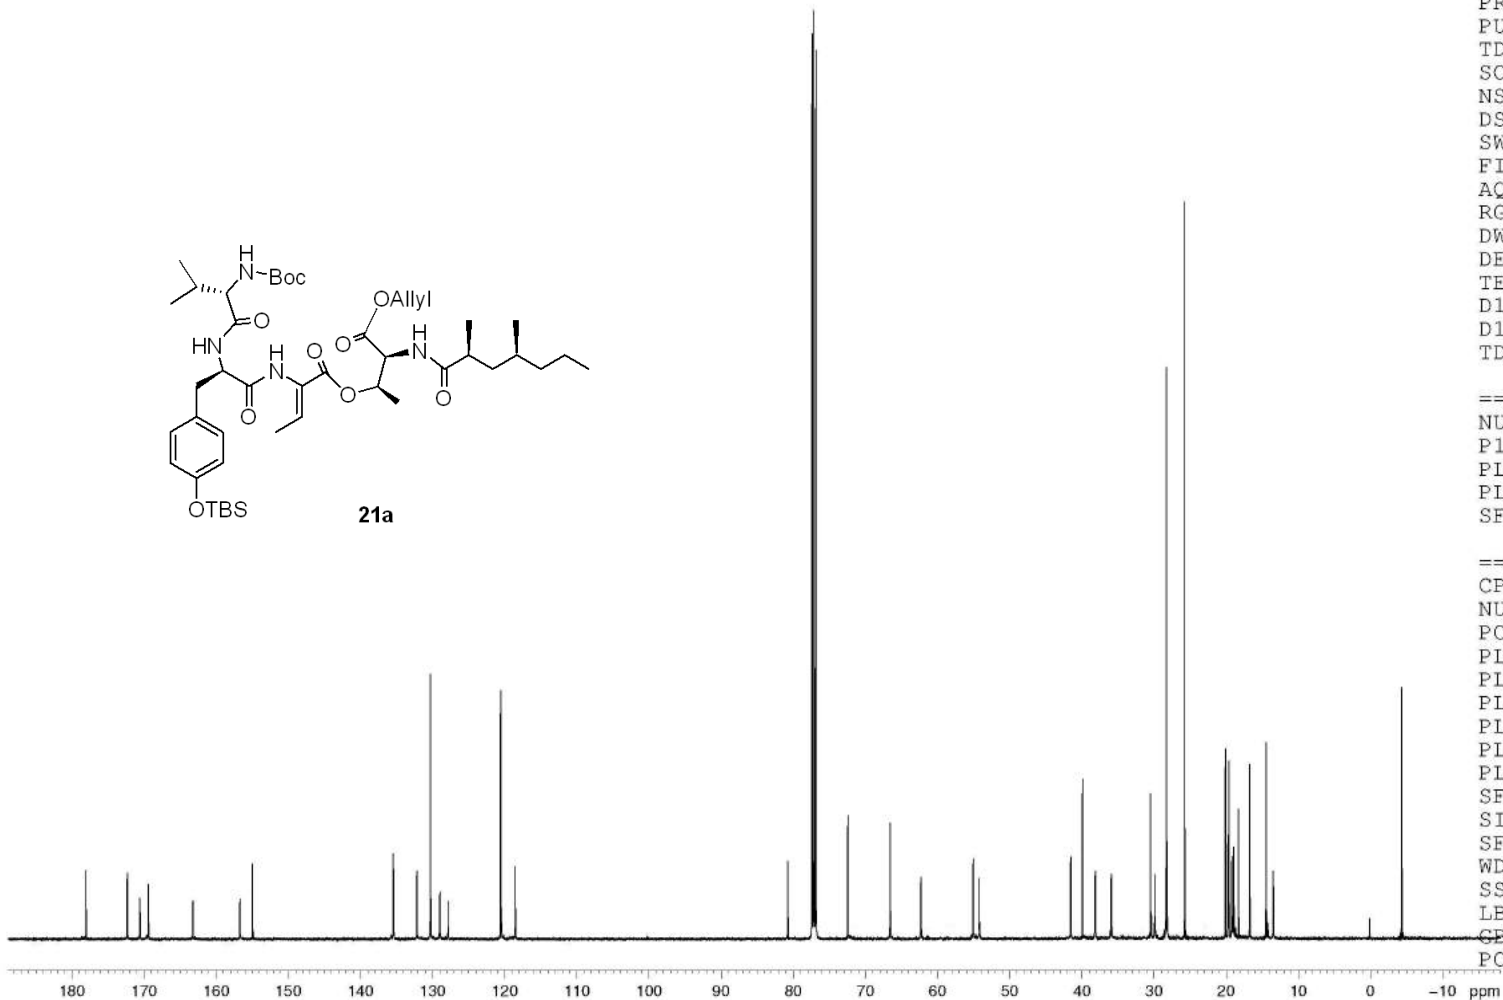



liushouxin-xh-RS-4

178.35  
172.36  
170.86  
169.42  
165.91  
163.32  
156.74  
154.94

135.41  
132.26  
130.32  
129.23  
128.09  
120.52  
118.43

80.66  
77.41  
77.16  
76.90  
72.00  
66.61  
62.25  
55.22  
54.30  
41.57  
39.92  
38.72  
38.22  
35.75  
30.67  
29.89  
28.22  
25.75  
20.13  
19.58  
19.11  
18.81  
18.28  
16.67  
14.38  
0.08  
-4.37



NAME 2021.03.11  
EXPNO 8  
PROCNO 1  
Date\_ 20210315  
Time 17.03  
INSTRUM spect  
PROBHD 5 mm PADUL 13C  
PULPROG zgpg30  
TD 32768  
SOLVENT CDC13  
NS 10240  
DS 0  
SWH 29761.904 Hz  
FIDRES 0.908261 Hz  
AQ 0.5505524 sec  
RG 2050  
DW 16.800 usec  
DE 6.50 usec  
TE 295.5 K  
D1 2.00000000 sec  
D11 0.03000000 sec  
TD0 1

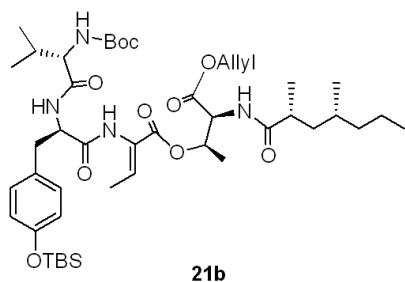

==== CHANNEL f1 =====  
NUC1 13C  
P1 12.00 usec  
PL1 4.50 dB  
PL1W 33.60015869 W  
SFO1 125.7703643 MHz

==== CHANNEL f2 =====  
CPDPRG2 waltz16  
NUC2 1H  
PCPD2 80.00 usec  
PL2 2.00 dB  
PL12 17.46 dB  
PL13 17.46 dB  
PL2W 16.79986763 W  
PL12W 0.47786582 W  
PL13W 0.47786582 W  
SFO2 500.1320005 MHz  
SI 32768  
SF 125.7577784 MHz  
WDW EM  
SSB 0  
LB 1.00 Hz  
GB 0  
PC 1.40

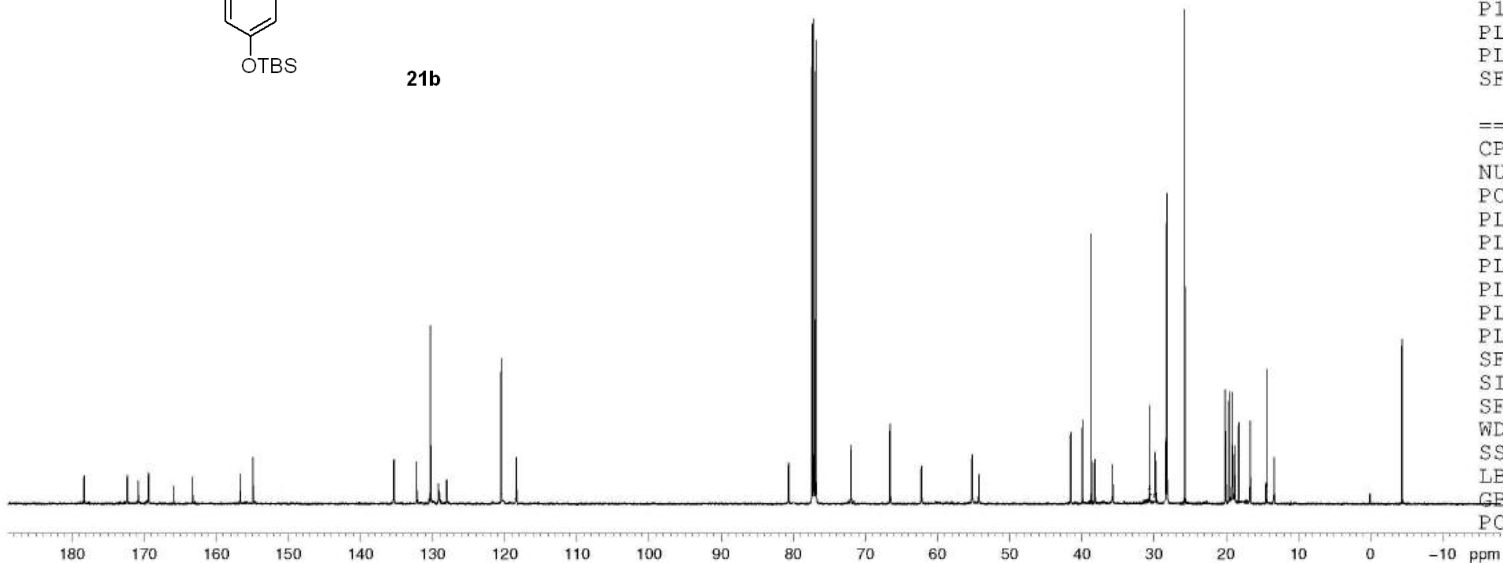



liushouxin-xh-SS-4

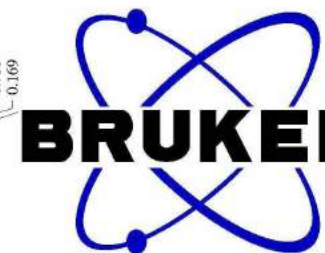

NAME 2020.12.29  
 EXPNO 7  
 PROCNO 1  
 Date\_ 20201229  
 Time 11.02  
 INSTRUM spect  
 PROBHD 5 mm PADUL 13C  
 PULPROG zg30  
 TD 65536  
 SOLVENT CDCl3  
 NS 32  
 DS 0  
 SWH 10000.000  
 FIDRES 0.152588  
 AQ 3.2768500  
 RG 512  
 DW 50.000  
 DE 6.50  
 TE 298.0  
 D1 1.00000000  
 TD0 1

===== CHANNEL f1 =====  
 NUC1 1H  
 P1 13.50  
 PL1 2.00  
 PL1W 16.79986763  
 SFO1 500.1340010  
 SI 32768  
 SF 500.1300227  
 WDW EM  
 SSB 0  
 LB 0.30  
 GB 0  
 PC 1.00

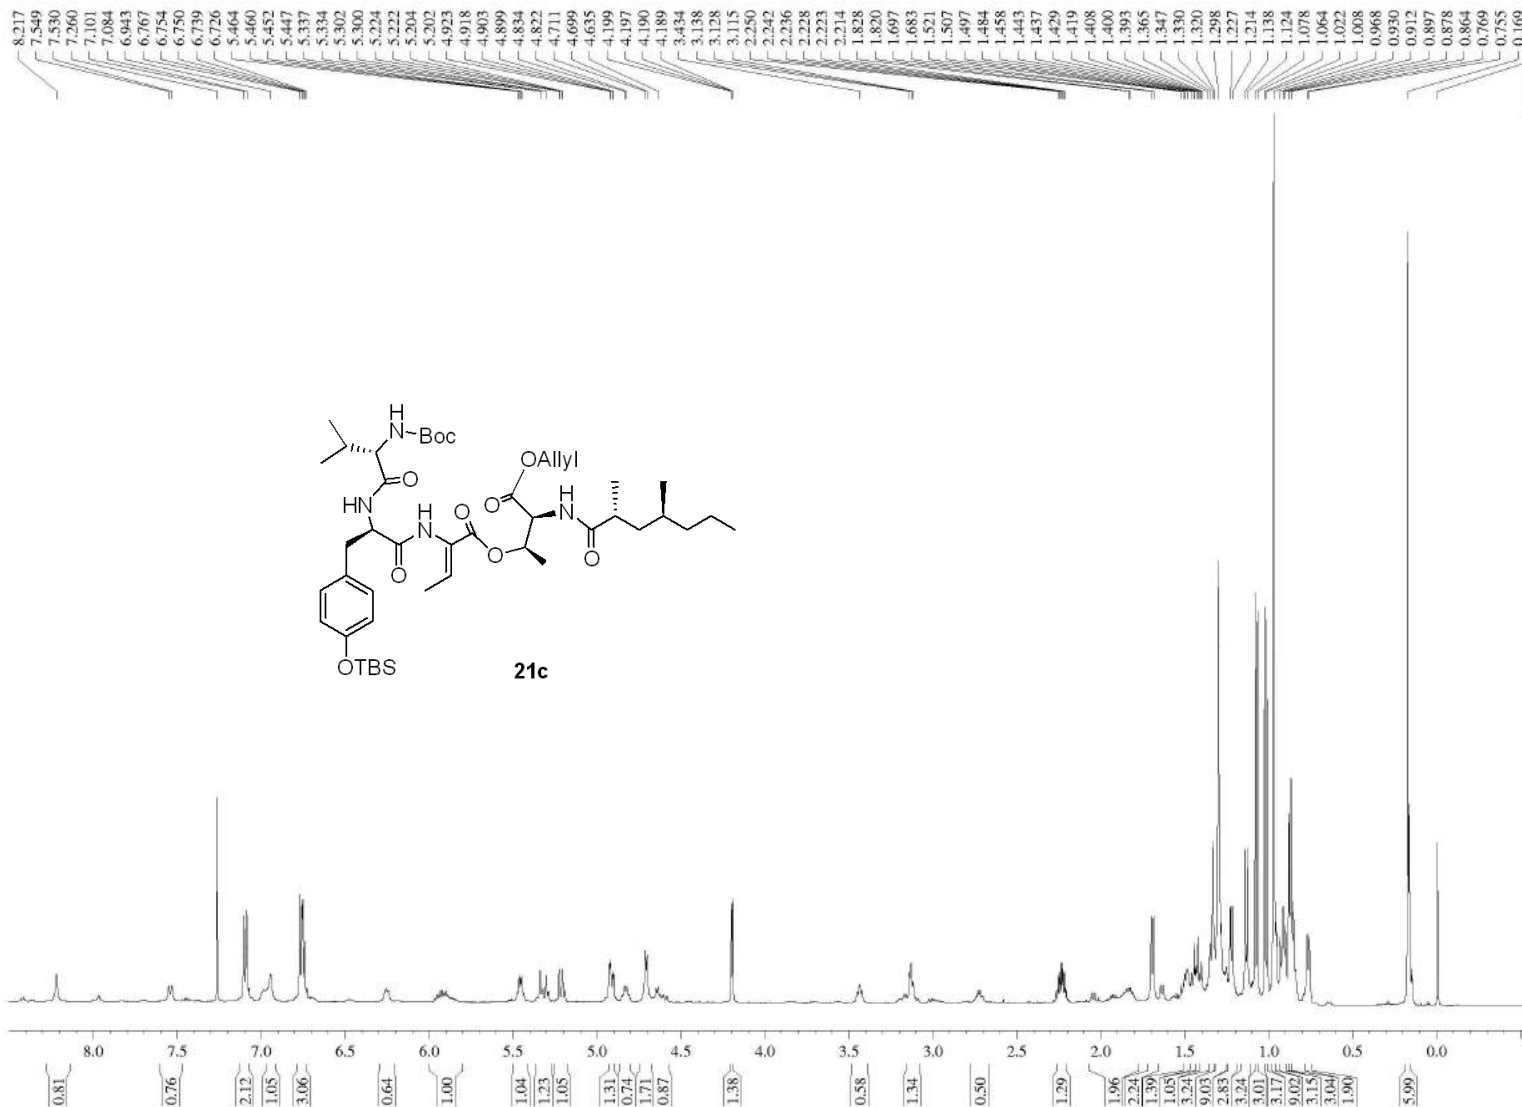



liushouxin-xh-SR-5

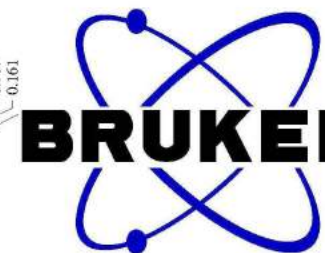

NAME 2021.03.11  
 EXPNO 2  
 PROCNO 2  
 Date\_ 20210630  
 Time 17.45  
 INSTRUM spect  
 PROBHD 5 mm PADUL 13C  
 PULPROG zg30  
 TD 65536  
 SOLVENT CDCl3  
 NS 8  
 DS 0  
 SWH 10000.000  
 FIDRES 0.152588  
 AQ 3.2768500  
 RG 80.6  
 DW 50.000  
 DE 6.50  
 TE 296.6  
 D1 1.00000000  
 TD0 1

===== CHANNEL f1 =====  
 NUC1 1H  
 P1 13.50  
 PL1 2.00  
 PL1W 16.79986763  
 SFO1 500.1340010  
 SI 32768  
 SF 500.1300229  
 WDW EM  
 SSB 0  
 LB 0.30  
 GB 0  
 PC 1.00

8.051 7.260 7.092 7.075 6.748 6.731 6.716 6.572 6.556 5.902 5.888 5.887 5.473 5.465 5.461 5.319 5.316 5.285 5.282 5.204 5.202 5.183 4.953 4.948 4.934 4.929 4.900 4.734 4.722 4.664 4.652 3.879 3.866 3.765 3.752 3.739 3.221 3.193 3.182 2.050 2.026 2.007 1.786 1.671 1.656 1.650 1.635 1.529 1.515 1.503 1.488 1.462 1.430 1.404 1.350 1.332 1.326 1.317 1.303 1.240 1.227 1.167 1.153 1.076 1.071 1.065 1.056 1.048 1.039 1.030 1.020 0.963 0.918 0.905 0.872 0.866 0.858 0.853 0.843 0.837 0.828 0.825 0.780 0.767 0.161

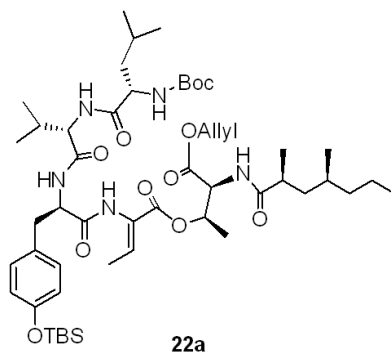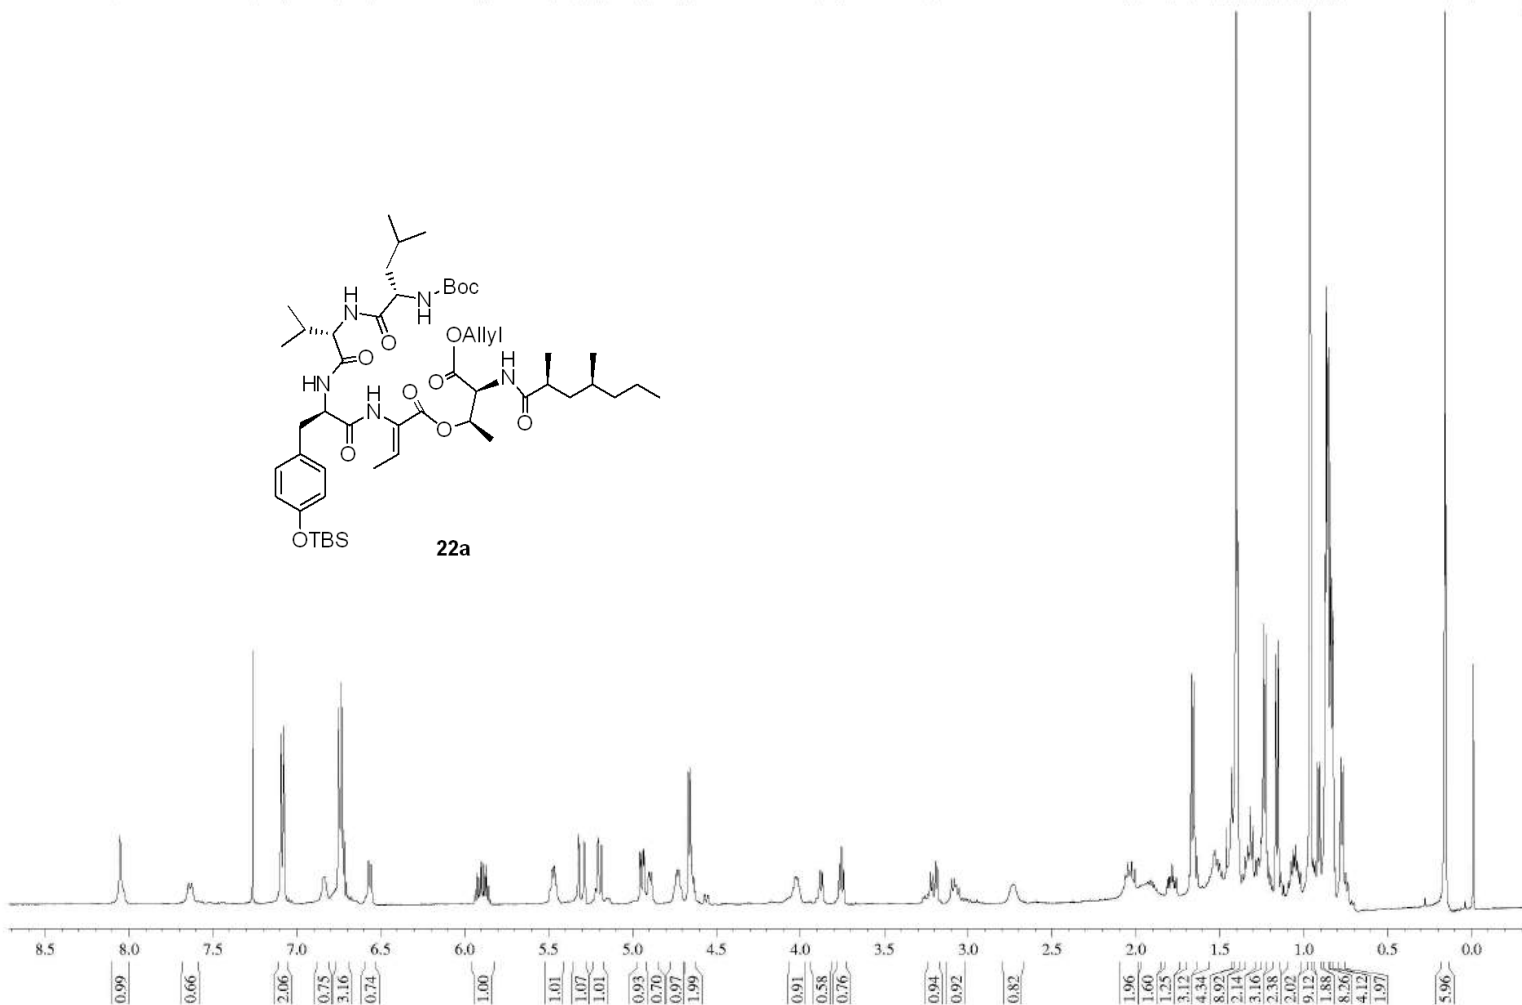

liushouxin-xh-SR-5

178.01  
173.58  
171.64  
170.02  
169.66  
163.18  
154.88

134.95  
132.02  
130.29  
129.34  
127.28  
120.47  
120.39  
118.81

80.89  
77.42  
77.16  
76.91  
72.19  
66.51  
60.83  
55.16  
54.95  
52.97  
41.68  
39.93  
38.35  
35.91  
30.48  
29.64  
28.41  
25.79  
24.73  
22.84  
22.13  
20.10  
19.71  
19.62  
19.19  
19.16  
18.40  
18.31  
16.96  
14.47  
13.91



NAME 2021.03.11  
EXPNO 3  
PROCNO 1  
Date\_ 20210311  
Time 17.14  
INSTRUM spect  
PROBHD 5 mm PADUL 13C  
PULPROG zgpg30  
TD 32768  
SOLVENT CDC13  
NS 10240  
DS 0  
SWH 29761.904 Hz  
FIDRES 0.908261 Hz  
AQ 0.5505524 sec  
RG 2050  
DW 16.800 usec  
DE 6.50 usec  
TE 297.9 K  
D1 2.00000000 sec  
D11 0.03000000 sec  
TD0 1

===== CHANNEL f1 =====  
NUC1 13C  
P1 12.00 usec  
PL1 4.50 dB  
PL1W 33.60015869 W  
SFO1 125.7703643 MHz

===== CHANNEL f2 =====  
CPDPRG2 waltz16  
NUC2 1H  
PCPD2 80.00 usec  
PL2 2.00 dB  
PL12 17.46 dB  
PL13 17.46 dB  
PL2W 16.79986763 W  
PL12W 0.47786582 W  
PL13W 0.47786582 W  
SFO2 500.1320005 MHz  
SI 32768  
SF 125.7577746 MHz  
WDW EM  
SSB 0  
LB 1.00 Hz  
GB 0  
PC 1.40

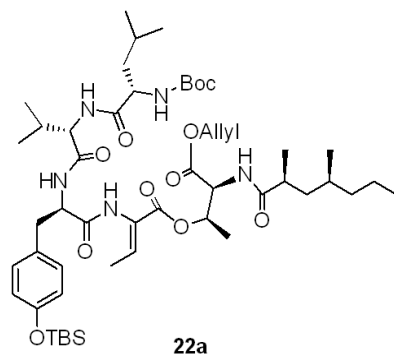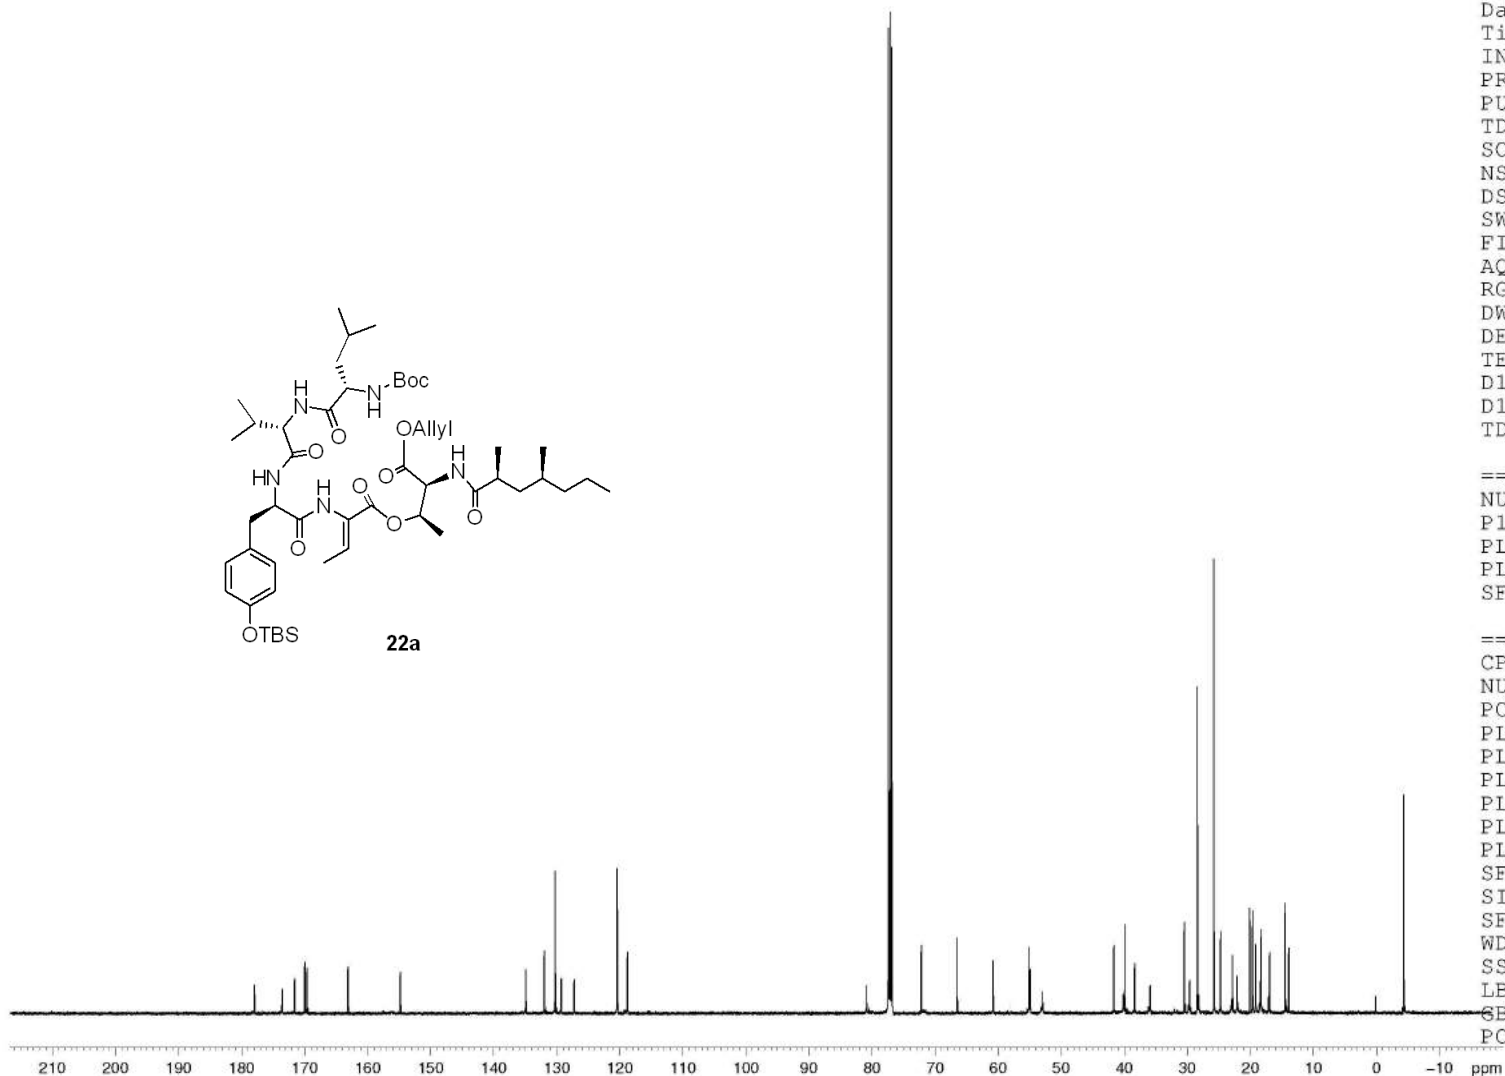

liushouxin-xh-RS-5

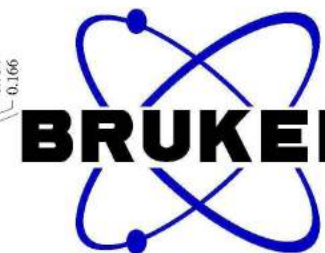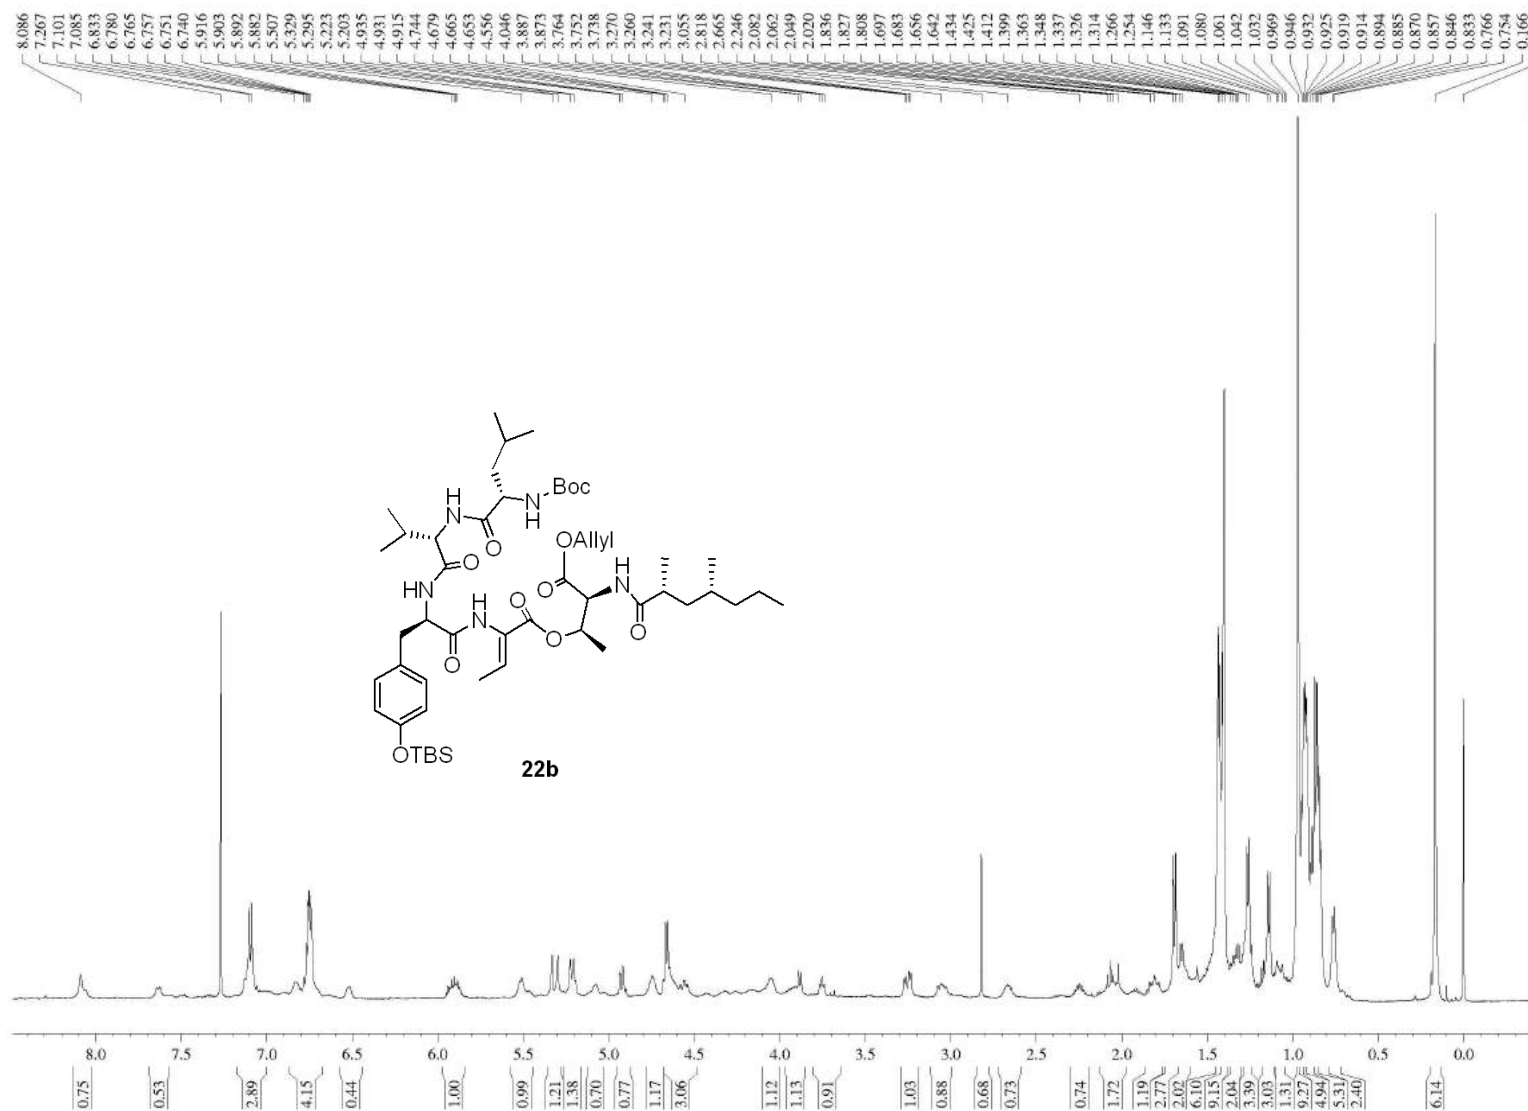

```

NAME          2021.03.11
EXPNO         5
PROCNO        1
Date_         20210313
Time          15.31
INSTRUM       spect
PROBHD        5 mm PADUL 13C
PULPROG       zg30
TD            65536
SOLVENT       CDCl3
NS            8
DS            0
SWH           10000.000
FIDRES        0.152588
AQ            3.2768500
RG            80.6
DW            50.000
DE            6.50
TE            295.1
D1            1.00000000
TD0           1
  
```

```

===== CHANNEL f1 =====
NUC1          1H
P1            13.50
PL1           2.00
PL1W         16.79986763
SFO1         500.1340010
SI            32768
SF           500.1300193
WDW           EM
SSB           0
LB            0.30
GB            0
RG            1.00
  
```



liushouxin-xh-RS-5

178.16  
173.99  
171.75  
169.92  
163.15  
156.20  
154.89  
135.48  
131.96  
130.23  
129.41  
127.06  
120.50  
120.42  
118.90

80.81  
77.42  
77.16  
76.91  
71.72  
66.62  
61.01  
57.16  
55.40  
55.10  
41.60  
41.51  
39.94  
39.91  
38.79  
38.60  
30.72  
28.41  
25.80  
24.71  
22.88  
22.07  
20.13  
19.65  
19.20  
19.16  
19.09  
18.32  
17.09  
14.42  
14.08  
0.14  
-4.32

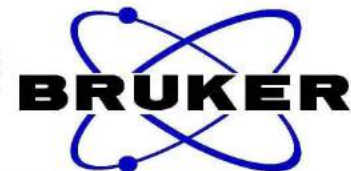

NAME 2021.03.11  
EXPNO 6  
PROCNO 1  
Date\_ 20210313  
Time 15.33  
INSTRUM spect  
PROBHD 5 mm PADUL 13C  
PULPROG zgpg30  
TD 32768  
SOLVENT CDC13  
NS 10240  
DS 0  
SWH 29761.904 Hz  
FIDRES 0.908261 Hz  
AQ 0.5505524 sec  
RG 2050  
DW 16.800 usec  
DE 6.50 usec  
TE 295.3 K  
D1 2.00000000 sec  
D11 0.03000000 sec  
TD0 1

==== CHANNEL f1 =====  
NUC1 13C  
P1 12.00 usec  
PL1 4.50 dB  
PL1W 33.60015869 W  
SFO1 125.7703643 MHz

==== CHANNEL f2 =====  
CPDPRG2 waltz16  
NUC2 1H  
PCPD2 80.00 usec  
PL2 2.00 dB  
PL12 17.46 dB  
PL13 17.46 dB  
PL2W 16.79986763 W  
PL12W 0.47786582 W  
PL13W 0.47786582 W  
SFO2 500.1320005 MHz  
SI 32768  
SF 125.7577735 MHz  
WDW EM  
SSB 0  
LB 1.00 Hz  
GB 0  
PC 1.40

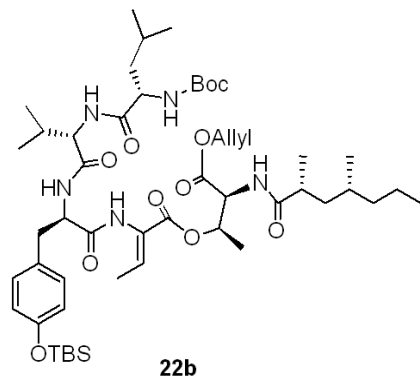

22b

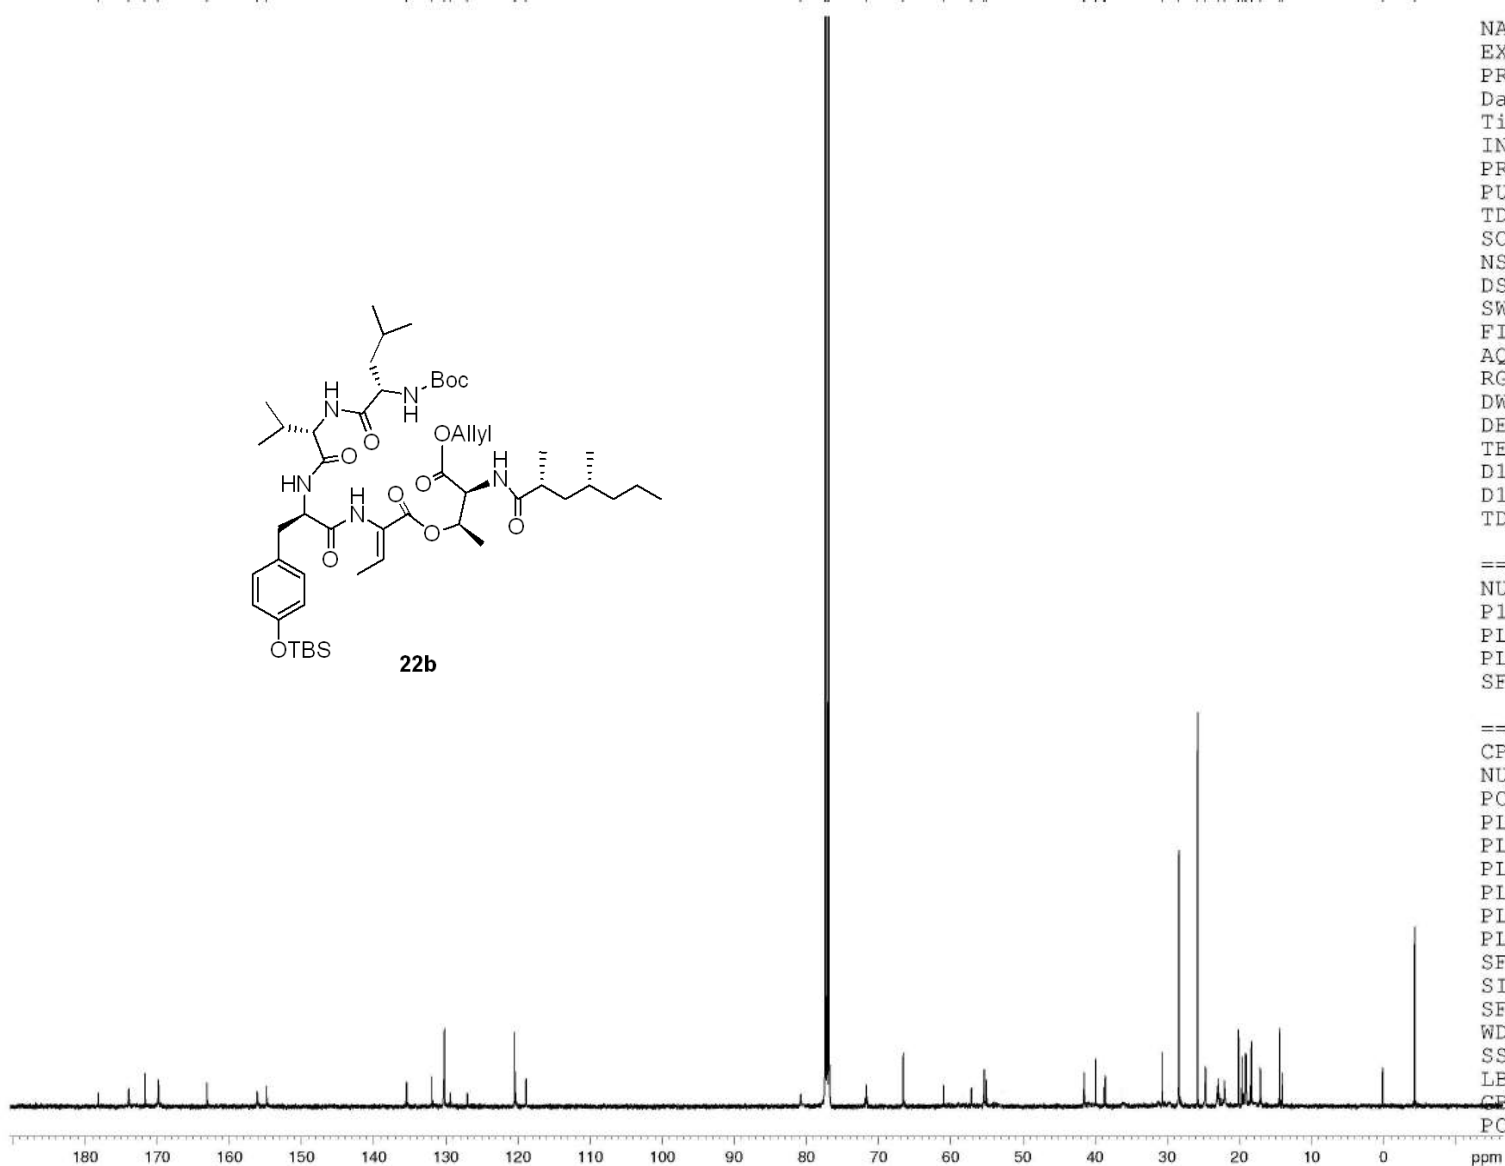



liushouxin-xh-SS-5

178.55  
173.80  
171.73  
170.00  
169.88  
163.13  
156.18  
154.83

135.27  
131.89  
130.25  
129.43  
127.03  
120.44  
120.38  
118.96

80.75  
77.42  
77.16  
76.91  
71.87  
66.59  
60.70  
57.18  
55.44  
55.08  
41.53  
41.00  
39.62  
38.64  
30.46  
28.40  
25.79  
24.80  
24.73  
22.88  
22.10  
20.11  
19.67  
19.15  
18.30  
18.07  
17.70  
17.11  
14.51  
14.06  
0.12  
-4.33



NAME 2021.03.11  
EXPNO 9  
PROCNO 1  
Date\_ 20210316  
Time 16.53  
INSTRUM spect  
PROBHD 5 mm PADUL 13C  
PULPROG zgpg30  
TD 32768  
SOLVENT CDC13  
NS 10240  
DS 0  
SWH 29761.904 Hz  
FIDRES 0.908261 Hz  
AQ 0.5505524 sec  
RG 2050  
DW 16.800 usec  
DE 6.50 usec  
TE 296.1 K  
D1 2.00000000 sec  
D11 0.03000000 sec  
TD0 1

==== CHANNEL f1 =====  
NUC1 13C  
P1 12.00 usec  
PL1 4.50 dB  
PL1W 33.60015869 W  
SFO1 125.7703643 MHz

==== CHANNEL f2 =====  
CPDPRG2 waltz16  
NUC2 1H  
PCPD2 80.00 usec  
PL2 2.00 dB  
PL12 17.46 dB  
PL13 17.46 dB  
PL2W 16.79986763 W  
PL12W 0.47786582 W  
PL13W 0.47786582 W  
SFO2 500.1320005 MHz  
SI 32768  
SF 125.7577751 MHz  
WDW EM  
SSB 0  
LB 1.00 Hz  
GB 0  
PC 1.40

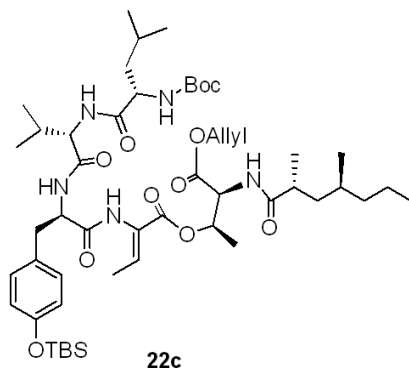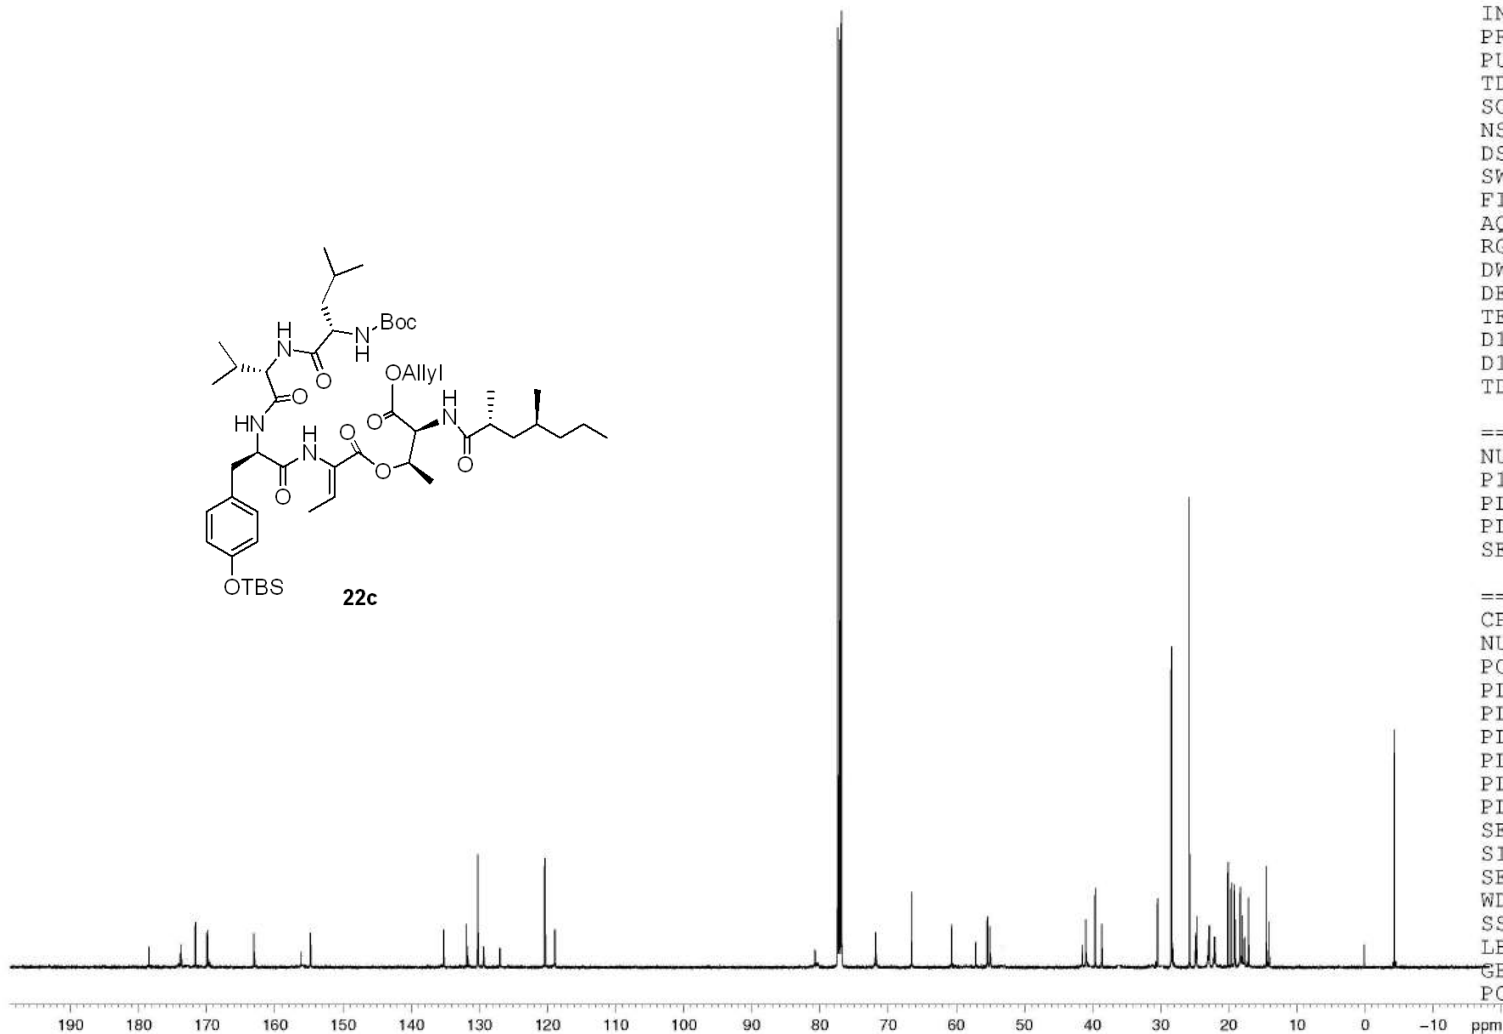







liushouxin-xh-RS-TBAF-TLC-1

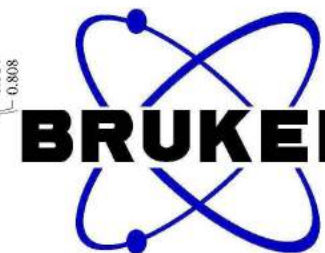

8.474 8.460 8.419 8.203 7.890 7.885 7.409 7.394 7.234 7.217 7.196 7.086 7.068 6.769 6.752 6.597 6.588 6.583 6.573 5.220 5.214 4.893 4.886 4.875 4.869 4.200 4.202 3.805 3.793 3.358 3.344 3.332 3.288 3.259 3.253 3.007 2.859 2.825 2.454 2.441 2.059 2.055 2.050 2.046 2.041 1.713 1.699 1.684 1.674 1.674 1.656 1.649 1.638 1.588 1.577 1.571 1.561 1.418 1.404 1.392 1.379 1.367 1.288 1.243 1.229 1.222 1.211 1.204 1.199 1.193 1.184 1.072 1.059 0.994 0.979 0.965 0.957 0.944 0.890 0.878 0.864 0.821 0.814 0.808

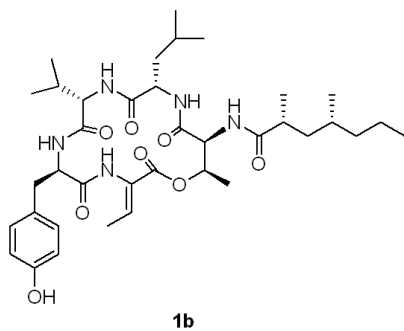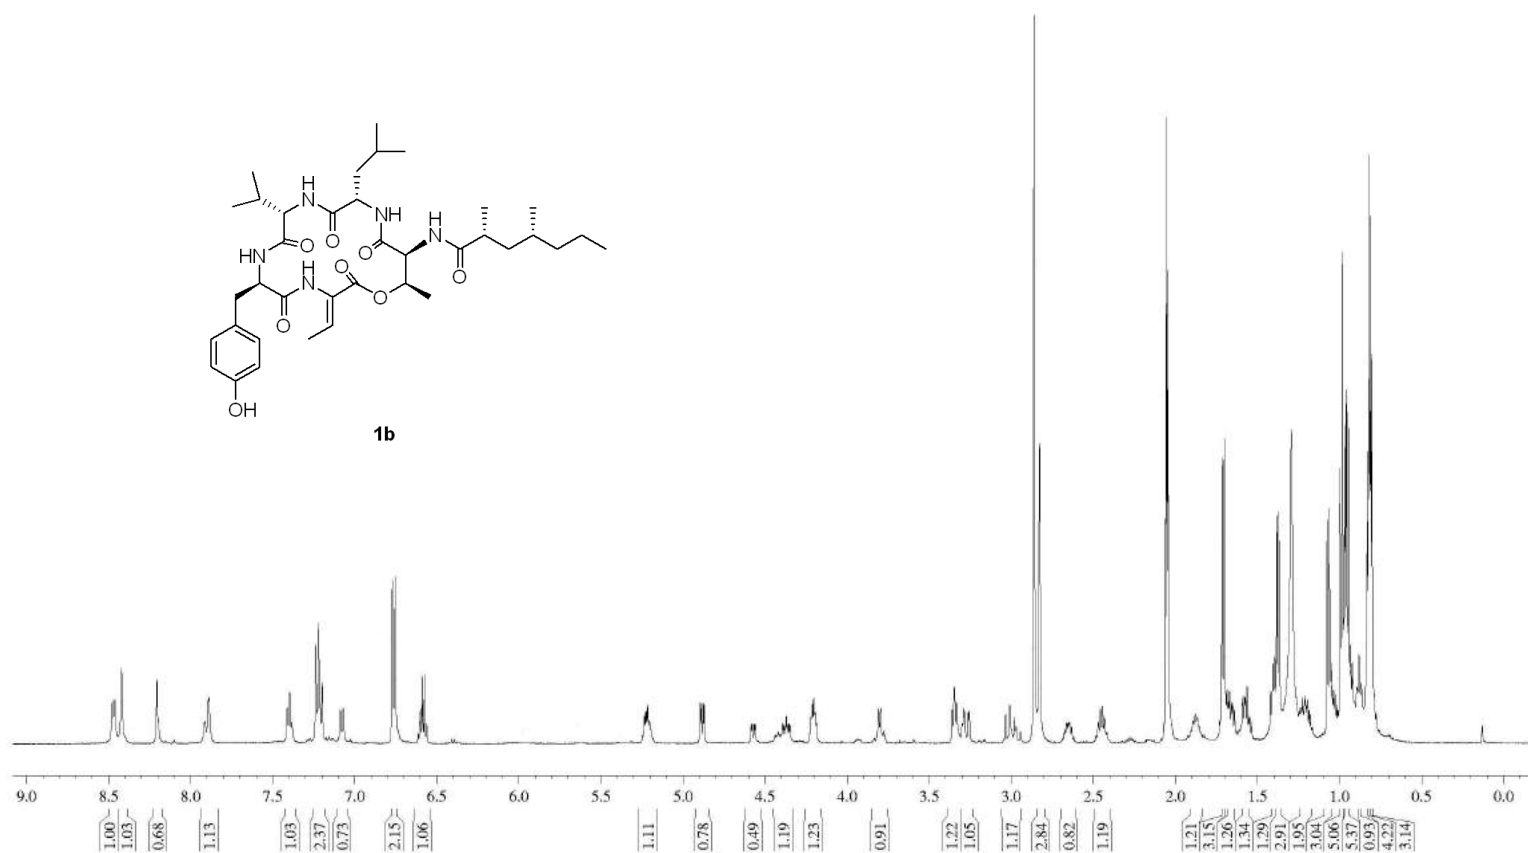

NAME 2021.04.08  
 EXPNO 4  
 PROCNO 1  
 Date\_ 20210408  
 Time 14.20  
 INSTRUM spect  
 PROBHD 5 mm PADUL 13C  
 PULPROG zg30  
 TD 65536  
 SOLVENT Acetone  
 NS 32  
 DS 0  
 SWH 10000.000  
 FIDRES 0.152588  
 AQ 3.2768500  
 RG 256  
 DW 50.000  
 DE 6.50  
 TE 294.9  
 D1 1.00000000  
 TD0 1

==== CHANNEL f1 ===  
 NUC1 1H  
 P1 13.50  
 PL1 2.00  
 PL1W 16.79986763  
 SFO1 500.1340010  
 SI 32768  
 SF 500.1300146  
 WDW EM  
 SSB 0  
 LB 0.30  
 GB 0  
 GC 1.00



liushouxin-xh-SS-TBAF-TLC

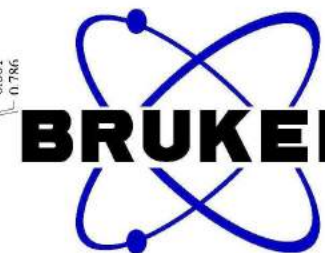

8.472 8.457 8.415 8.179 7.904 7.391 7.375 7.213 7.196 6.768 6.751 6.595 6.581 5.358 5.348 5.339 5.211 4.580 4.562 4.575 4.556 4.216 4.209 4.201 4.201 3.805 3.795 3.792 3.355 3.341 3.329 3.295 2.967 2.839 2.805 2.455 2.443 2.158 2.143 2.128 2.059 2.054 2.050 2.046 2.041 2.041 1.974 1.959 1.712 1.698 1.683 1.676 1.667 1.655 1.648 1.637 1.588 1.577 1.571 1.561 1.550 1.544 1.405 1.392 1.382 1.374 1.369 1.361 1.294 1.063 1.060 1.049 1.046 0.992 0.979 0.966 0.956 0.943 0.892 0.879 0.865 0.835 0.830 0.821 0.815 0.801 0.786

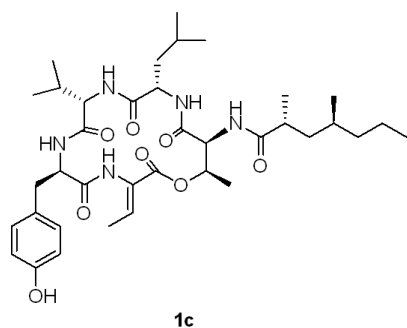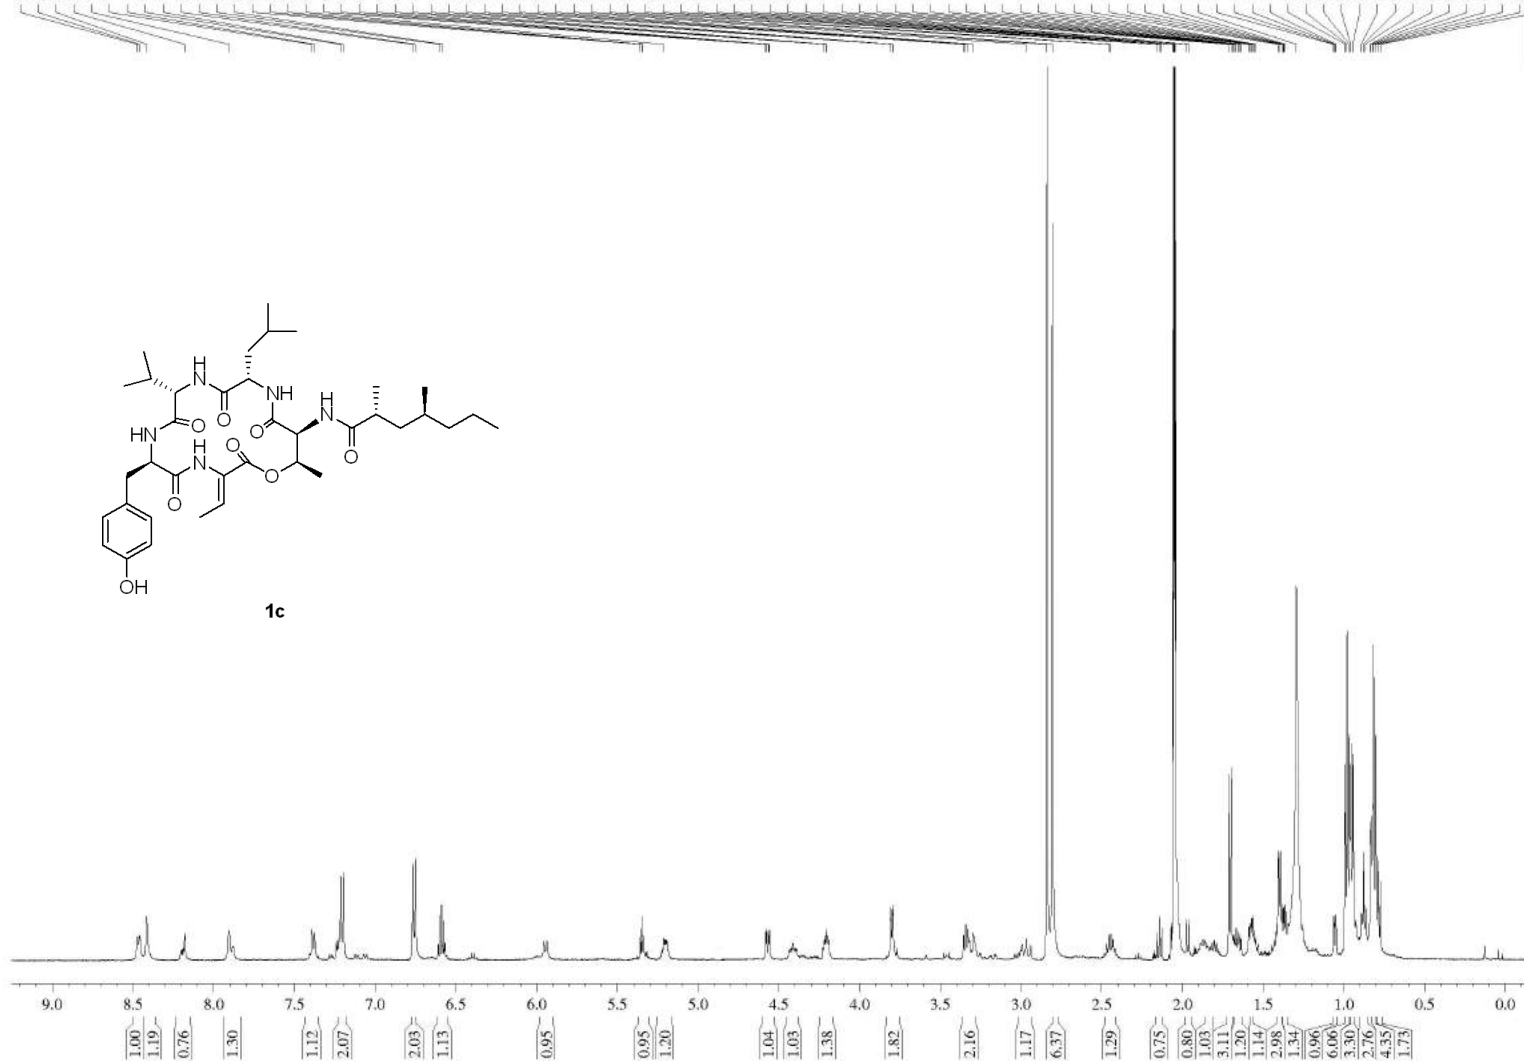

NAME 2021.04.08  
 EXPNO 6  
 PROCNO 1  
 Date\_ 20210408  
 Time 14.40  
 INSTRUM spect  
 PROBHD 5 mm PADUL 13C  
 PULPROG zg30  
 TD 65536  
 SOLVENT Acetone  
 NS 64  
 DS 0  
 SWH 10000.000  
 FIDRES 0.152588  
 AQ 3.2768500  
 RG 456  
 DW 50.000  
 DE 6.50  
 TE 294.9  
 D1 1.00000000  
 TD0 1

==== CHANNEL f1 ===  
 NUC1 1H  
 P1 13.50  
 PL1 2.00  
 PL1W 16.79986763  
 SFO1 500.1340010  
 SI 32768  
 SF 500.1300147  
 WDW EM  
 SSB 0  
 LB 0.30  
 GB 0  
 PC 1.00





liushouxin-xh-SR-DT

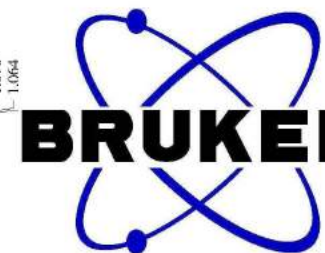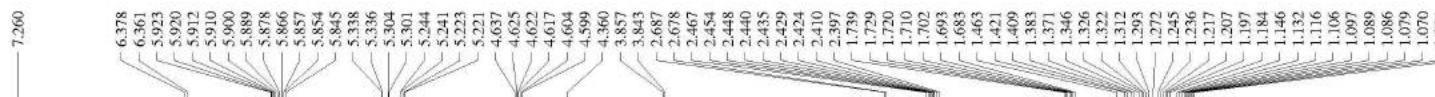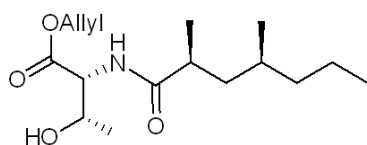

S15

NAME 2021.05.27  
 EXPNO 1  
 PROCNO 1  
 Date\_ 20210527  
 Time 14.35  
 INSTRUM spect  
 PROBHD 5 mm PADUL 13C  
 PULPROG zg30  
 TD 65536  
 SOLVENT CDCl3  
 NS 8  
 DS 0  
 SWH 9014.423  
 FIDRES 0.137549  
 AQ 3.6351135  
 RG 64  
 DW 55.467  
 DE 6.50  
 TE 296.8  
 D1 1.00000000  
 TD0 1

==== CHANNEL f1 ===  
 NUC1 1H  
 P1 13.50  
 PL1 2.00  
 PL1W 16.79986763  
 SFO1 500.1340010  
 SI 32768  
 SF 500.1300229  
 WDW EM  
 SSB 0  
 LB 0.30  
 GB 0  
 PC 1.00

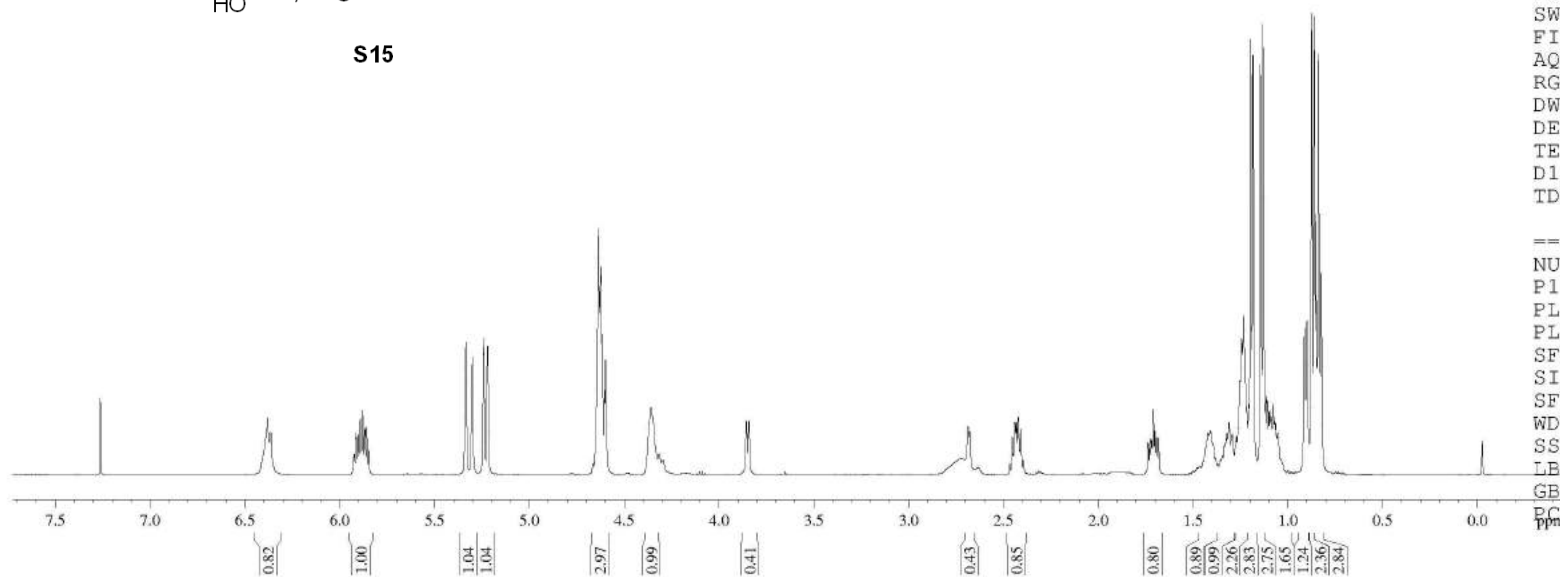

liushouxin-xh-SR-DT

— 177.53  
— 171.02

— 131.60

— 118.94

77.41  
77.16  
76.90  
68.00  
66.20  
57.14

41.79  
39.61  
39.36  
30.55  
20.05  
20.01  
19.59  
18.78  
14.36

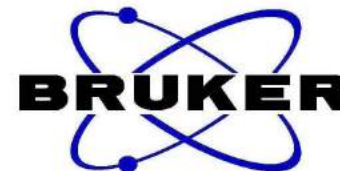

NAME 2021.05.27  
EXPNO 10  
PROCNO 1  
Date\_ 20210527  
Time 15.52  
INSTRUM spect  
PROBHD 5 mm PADUL 13C  
PULPROG zgpg30  
TD 32768  
SOLVENT CDC13  
NS 182  
DS 0  
SWH 29761.904 Hz  
FIDRES 0.908261 Hz  
AQ 0.5505524 sec  
RG 2050  
DW 16.800 usec  
DE 6.50 usec  
TE 299.1 K  
D1 2.00000000 sec  
D11 0.03000000 sec  
TD0 1

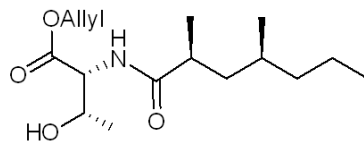

S15

==== CHANNEL f1 =====  
NUC1 13C  
P1 12.00 usec  
PL1 4.50 dB  
PL1W 33.60015869 W  
SFO1 125.7703643 MHz

==== CHANNEL f2 =====  
CPDPRG2 waltz16  
NUC2 1H  
PCPD2 80.00 usec  
PL2 2.00 dB  
PL12 17.46 dB  
PL13 17.46 dB  
PL2W 16.79986763 W  
PL12W 0.47786582 W  
PL13W 0.47786582 W  
SFO2 500.1320005 MHz  
SI 32768  
SF 125.7577778 MHz  
WDW EM  
SSB 0  
LB 1.00 Hz  
GB 0  
PC 1.40

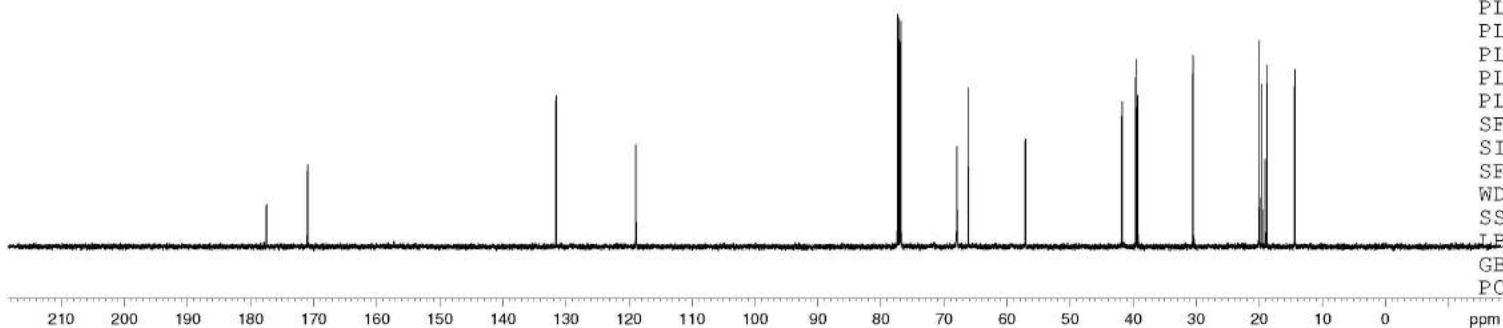



liushouxin-xh-SR-DT-T

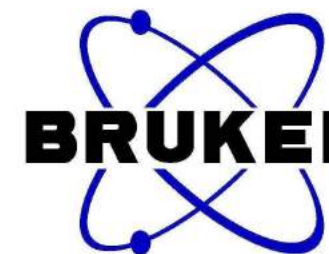

NAME 2021.05.27  
 EXPNO 2  
 PROCNO 1  
 Date\_ 20210527  
 Time 14.41  
 INSTRUM spect  
 PROBHD 5 mm PADUL 13C  
 PULPROG zg30  
 TD 65536  
 SOLVENT CDCl3  
 NS 2  
 DS 0  
 SWH 9014.423  
 FIDRES 0.137549  
 AQ 3.6351135  
 RG 20.2  
 DW 55.467  
 DE 6.50  
 TE 296.8  
 D1 1.00000000  
 TD0 1

===== CHANNEL f1 =====  
 NUC1 1H  
 P1 13.50  
 PL1 2.00  
 PL1W 16.79986763  
 SFO1 500.1340010  
 SI 32768  
 SF 500.1300225  
 WDW EM  
 SSB 0  
 LB 0.30  
 GB 0  
 PC 1.00

7.260 6.246 6.228 5.899 5.888 5.879 5.868 5.857 5.847 5.834 5.823 5.813 5.802 5.400 5.396 5.387 5.383 5.297 5.289 5.287 5.262 5.255 5.252 5.243 5.225 5.207 5.207 5.186 4.731 4.716 4.607 4.596 4.580 4.566 4.554 4.546 4.534 4.520 4.508 4.069 4.052 4.041 2.478 2.455 2.444 2.437 2.430 2.424 2.412 2.398 1.732 1.720 1.713 1.706 1.694 1.686 1.675 1.421 1.270 1.257 1.157 1.142 1.135 1.121 1.103 1.092 0.860 0.847 0.828 0.813 0.799

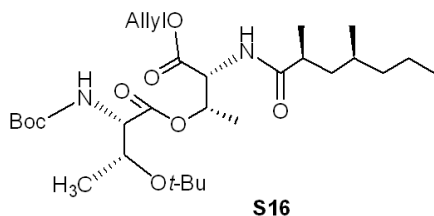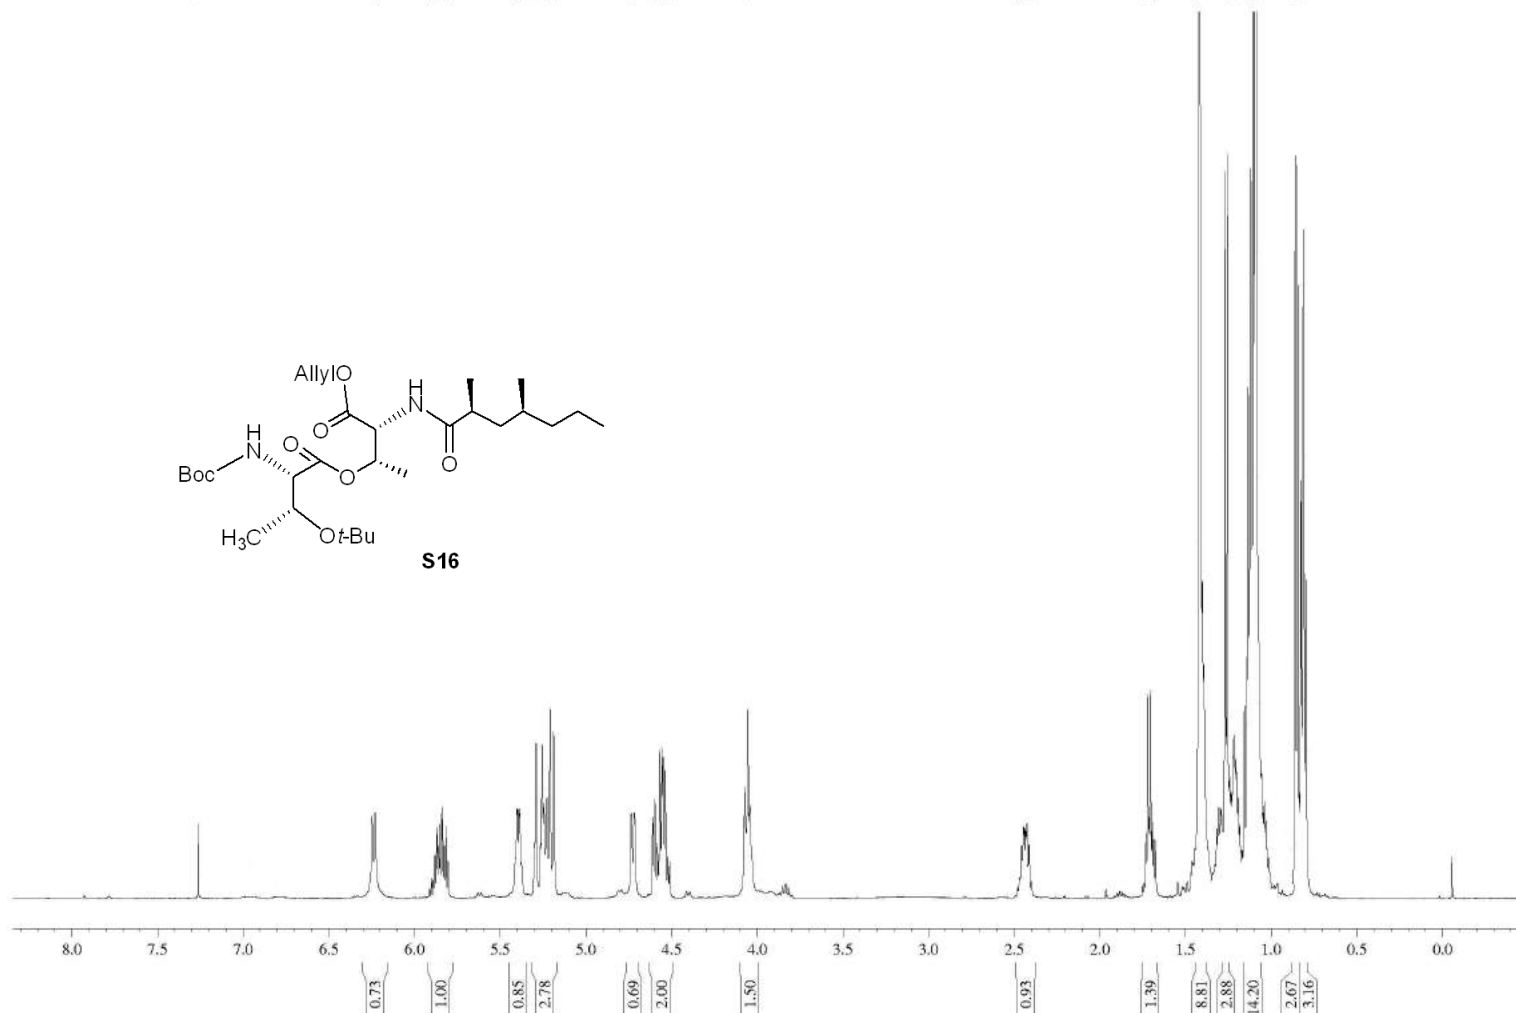

liushouxin-xh-SR-DT-T

177.34  
170.42  
169.37  
155.87  
131.51  
119.00

79.87  
77.42  
77.16  
76.91  
74.12  
71.69  
67.32  
66.40  
59.41  
55.33  
41.47  
39.50  
39.16  
30.53  
28.56  
28.42  
20.40  
19.98  
19.65  
18.72  
17.38  
14.32

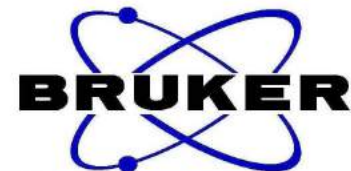

NAME 2021.05.27  
EXPNO 11  
PROCNO 1  
Date\_ 20210527  
Time 15.59  
INSTRUM spect  
PROBHD 5 mm PADUL 13C  
PULPROG zgpg30  
TD 32768  
SOLVENT CDC13  
NS 940  
DS 0  
SWH 29761.904 Hz  
FIDRES 0.908261 Hz  
AQ 0.5505524 sec  
RG 2050  
DW 16.800 usec  
DE 6.50 usec  
TE 298.2 K  
D1 2.00000000 sec  
D11 0.03000000 sec  
TD0 1

==== CHANNEL f1 =====  
NUC1 13C  
P1 12.00 usec  
PL1 4.50 dB  
PL1W 33.60015869 W  
SFO1 125.7703643 MHz

==== CHANNEL f2 =====  
CPDPRG2 waltz16  
NUC2 1H  
PCPD2 80.00 usec  
PL2 2.00 dB  
PL12 17.46 dB  
PL13 17.46 dB  
PL2W 16.79986763 W  
PL12W 0.47786582 W  
PL13W 0.47786582 W  
SFO2 500.1320005 MHz  
SI 32768  
SF 125.7577803 MHz  
WDW EM  
SSB 0  
LB 1.00 Hz  
GB 0  
PC 1.40

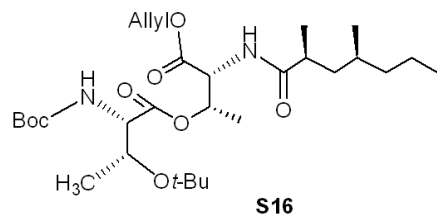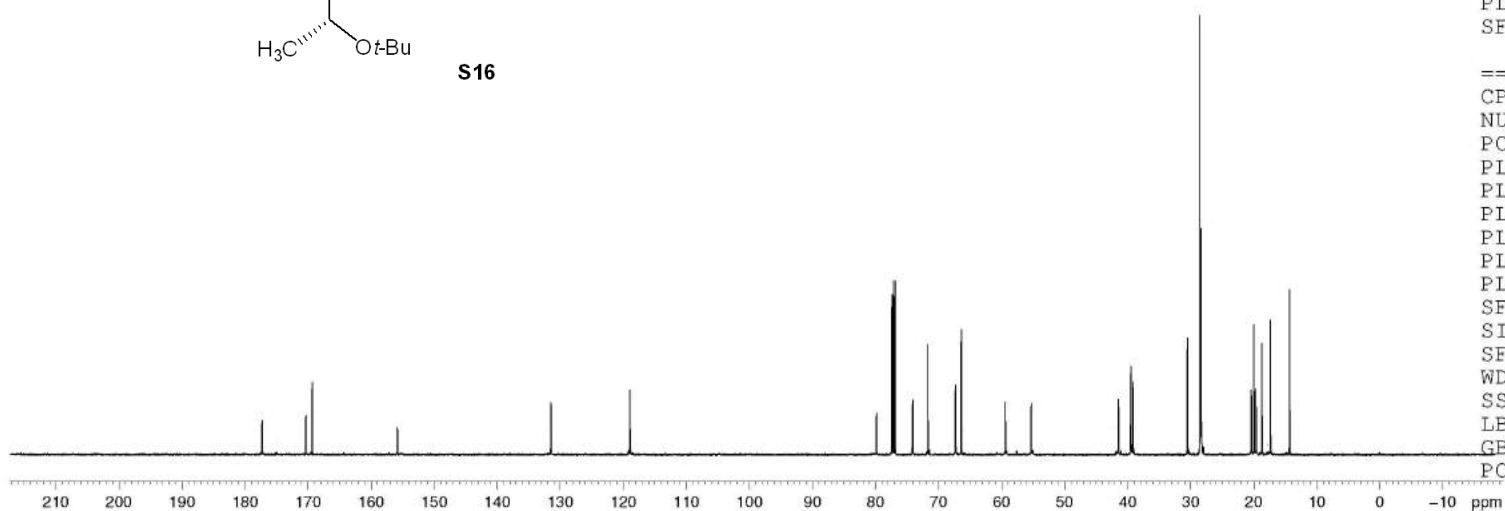

liushouxin-xh-SR-DT-3

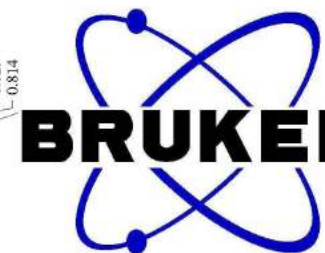

NAME 2021.05.27  
 EXPNO 3  
 PROCNO 1  
 Date\_ 20210527  
 Time 14.47  
 INSTRUM spect  
 PROBHD 5 mm PADUL 13C  
 PULPROG zg30  
 TD 65536  
 SOLVENT CDCl3  
 NS 2  
 DS 0  
 SWH 9014.423  
 FIDRES 0.137549  
 AQ 3.6351135  
 RG 20.2  
 DW 55.467  
 DE 6.50  
 TE 296.7  
 D1 1.00000000  
 TD0 1

===== CHANNEL f1 =====  
 NUC1 1H  
 P1 13.50  
 PL1 2.00  
 PL1W 16.79986763  
 SFO1 500.1340010  
 SI 32768  
 SF 500.1300225  
 WDW EM  
 SSB 0  
 LB 0.30  
 GB 0  
 PC 1.00

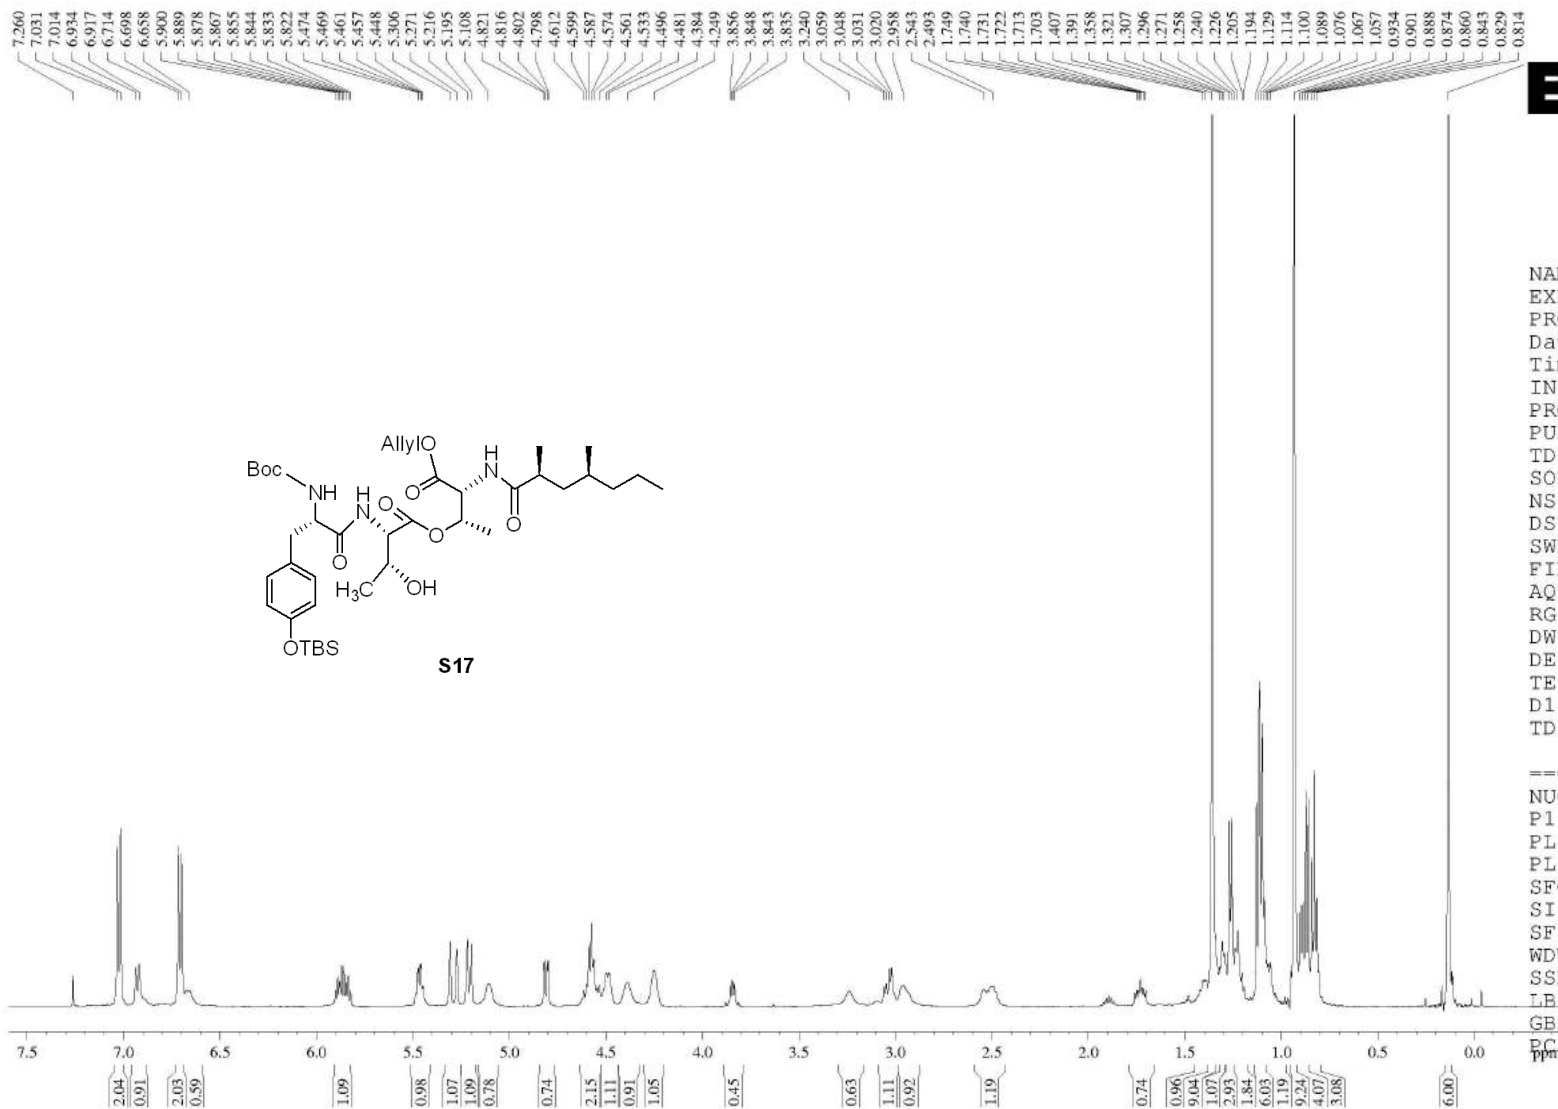

liushouxin XH-SR-DT-3

177.56  
172.34  
170.18  
169.35  
155.60  
154.67  
131.50  
130.34  
129.07  
120.21  
119.16

80.27  
77.41  
77.16  
76.90  
71.89  
67.79  
66.73  
57.66  
55.78  
55.15  
41.57  
39.62  
38.99  
36.95  
30.59  
28.28  
25.70  
20.00  
19.57  
19.05  
18.87  
18.19  
17.22  
14.33  
-4.42

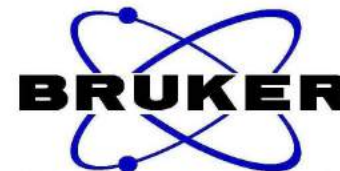

NAME 2021.05.27  
EXPNO 41  
PROCNO 1  
Date\_ 20210528  
Time 11.38  
INSTRUM spect  
PROBHD 5 mm PADUL 13C  
PULPROG zgpg30  
TD 10240  
SOLVENT CDC13  
NS 114  
DS 4  
SWH 29761.904 Hz  
FIDRES 2.906436 Hz  
AQ 0.1720820 sec  
RG 2050  
DW 16.800 usec  
DE 6.50 usec  
TE 298.9 K  
D1 2.00000000 sec  
D11 0.03000000 sec  
TD0 1

===== CHANNEL f1 =====  
NUC1 13C  
P1 12.00 usec  
PL1 4.50 dB  
PL1W 33.60015869 W  
SFO1 125.7703643 MHz

===== CHANNEL f2 =====  
CPDPRG2 waltz16  
NUC2 1H  
PCPD2 80.00 usec  
PL2 2.00 dB  
PL12 17.46 dB  
PL13 17.46 dB  
PL2W 16.79986763 W  
PL12W 0.47786582 W  
PL13W 0.47786582 W  
SFO2 500.1320005 MHz  
SI 32768  
SF 125.7577832 MHz  
WDW EM  
SSB 0  
LB 3.00 Hz  
GB 0  
PC 1.40

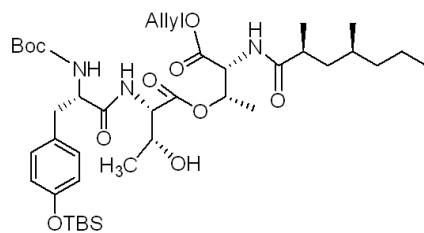

S17

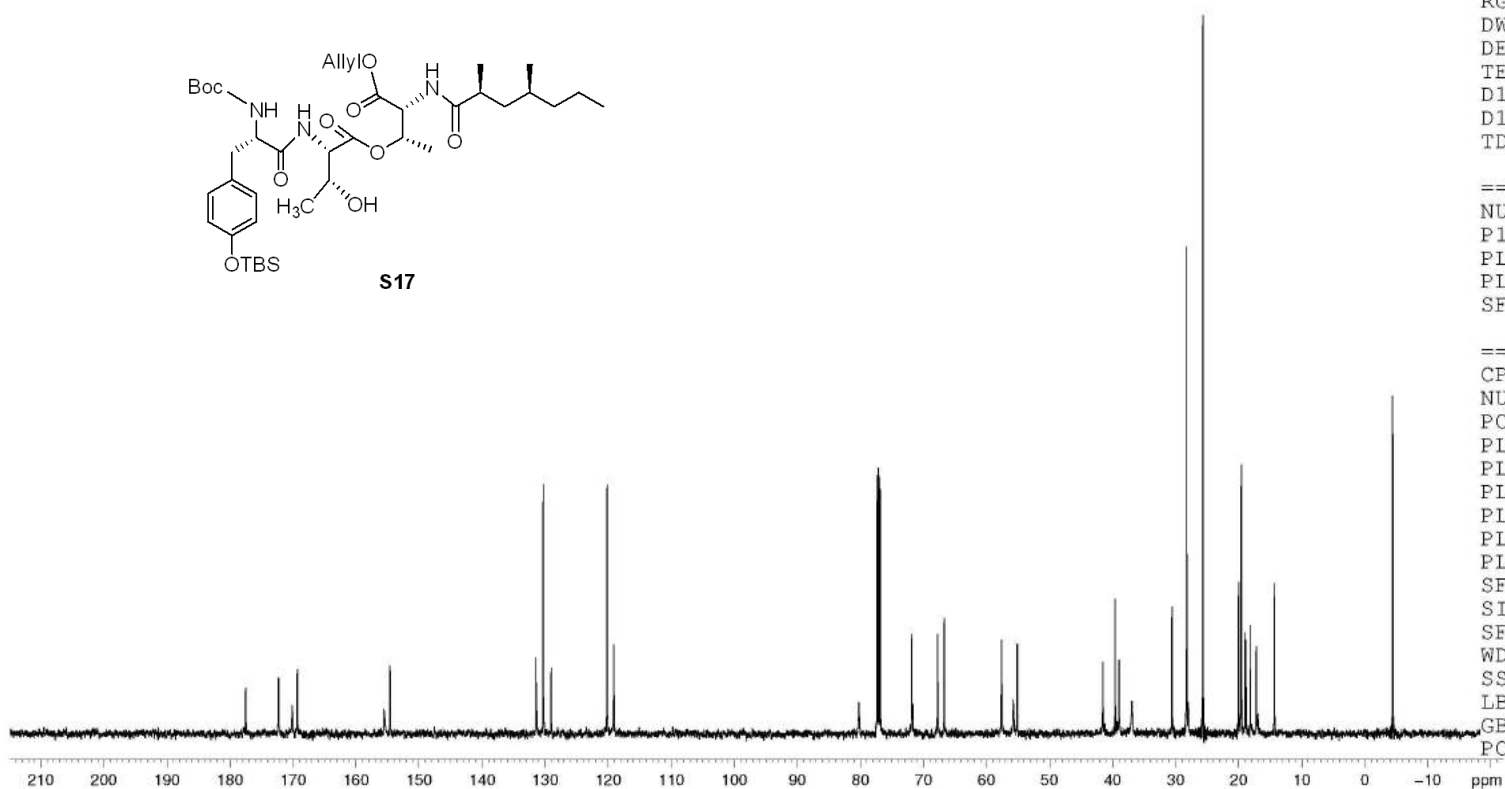

liushouxin-xh-SR-DT-3-H20

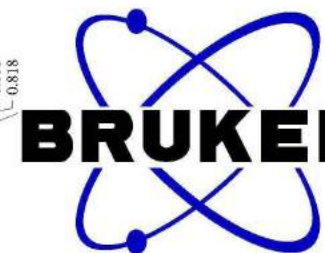

NAME 2021.05.27  
 EXPNO 4  
 PROCNO 1  
 Date\_ 20210527  
 Time 14.57  
 INSTRUM spect  
 PROBHD 5 mm PADUL 13C  
 PULPROG zg30  
 TD 65536  
 SOLVENT CDCl3  
 NS 4  
 DS 0  
 SWH 9014.423  
 FIDRES 0.137549  
 AQ 3.6351135  
 RG 50.8  
 DW 55.467  
 DE 6.50  
 TE 296.8  
 D1 1.00000000  
 TD0 1

===== CHANNEL f1 =====  
 NUC1 1H  
 P1 13.50  
 PL1 2.00  
 PL1W 16.79986763  
 SFO1 500.1340010  
 SI 32768  
 SF 500.1300227  
 WDW EM  
 SSB 0  
 LB 0.30  
 GB 0  
 PC 1.00

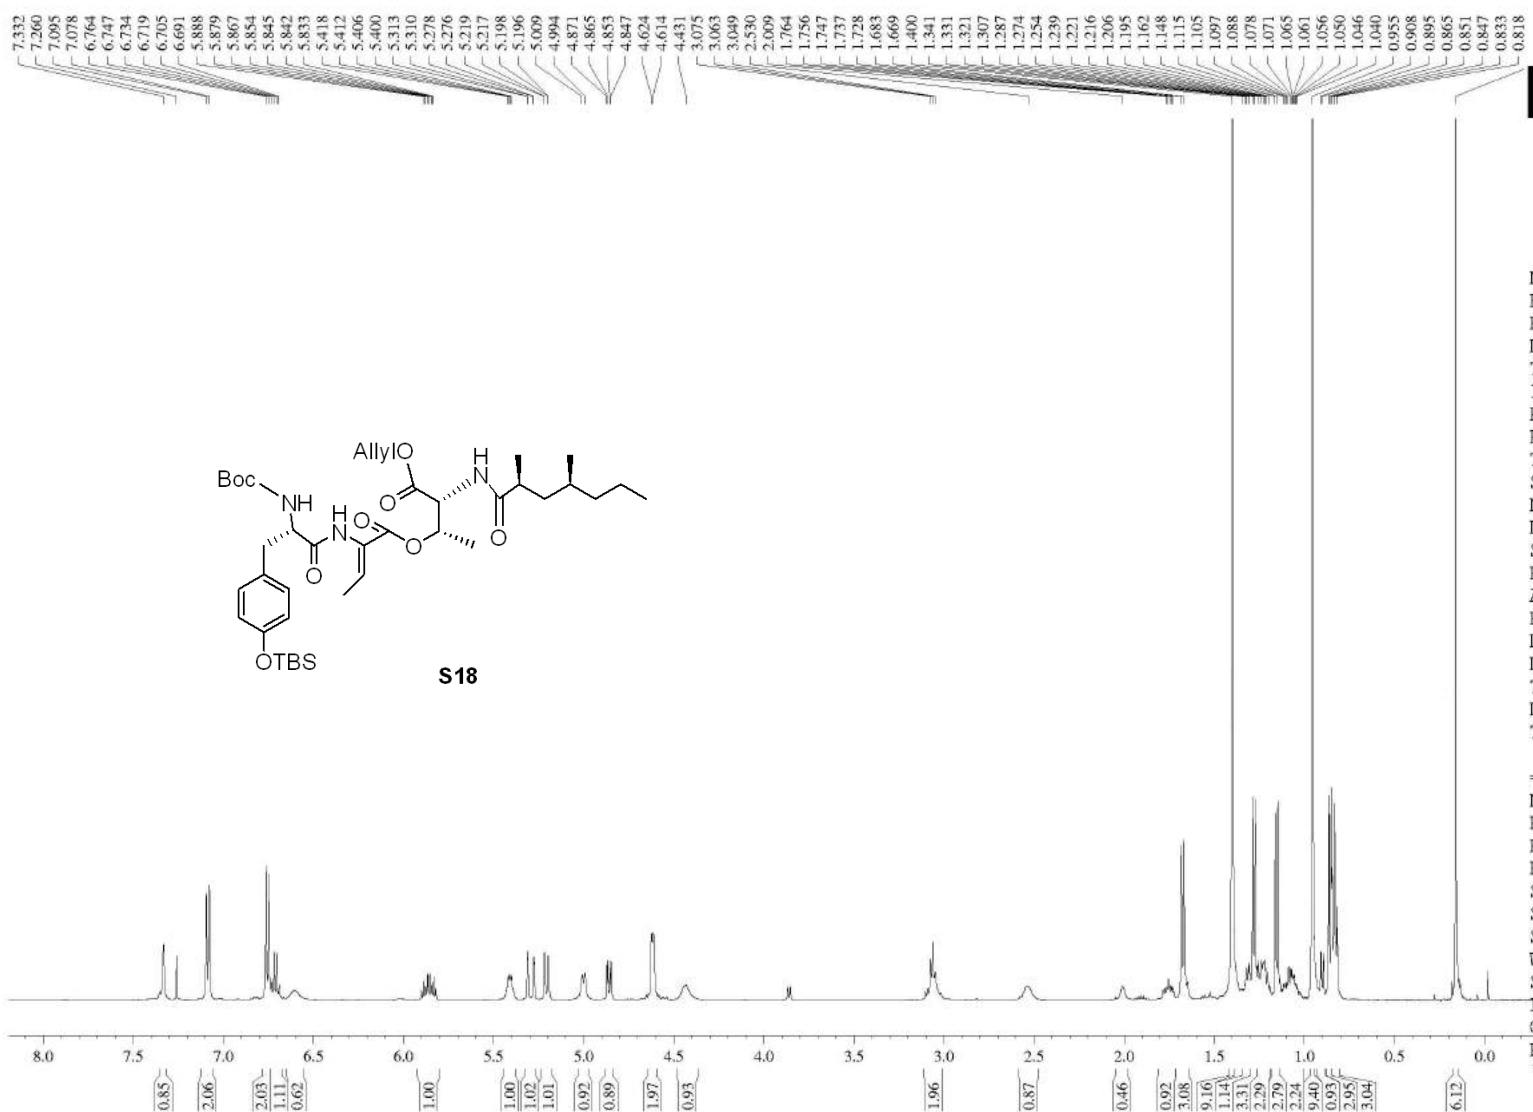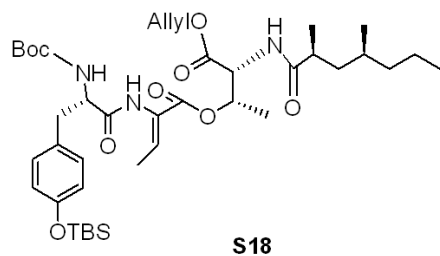



liushouxin XH-SR-DT-3-H2O

177.54  
170.48  
169.70  
163.02  
154.84  
135.03  
131.62  
130.41  
129.09  
126.27  
120.42  
119.20

80.59  
77.41  
77.16  
76.91  
72.15  
66.56  
55.53  
41.56  
39.72  
39.04  
36.81  
30.65  
28.36  
25.76  
20.04  
19.66  
19.13  
19.04  
18.28  
17.02  
14.39  
-4.35



NAME 2021.05.27  
EXPNO 38  
PROCNO 1  
Date\_ 20210528  
Time 9.58  
INSTRUM spect  
PROBHD 5 mm PADUL 13C  
PULPROG zgpg30  
TD 10240  
SOLVENT CDC13  
NS 200  
DS 0  
SWH 29761.904 Hz  
FIDRES 2.906436 Hz  
AQ 0.1720820 sec  
RG 2050  
DW 16.800 usec  
DE 6.50 usec  
TE 298.0 K  
D1 2.00000000 sec  
D11 0.03000000 sec  
TD0 1

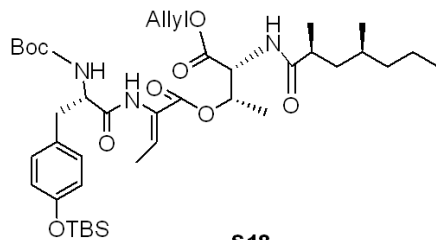

==== CHANNEL f1 =====  
NUC1 13C  
P1 12.00 usec  
PL1 4.50 dB  
PL1W 33.60015869 W  
SFO1 125.7703643 MHz

==== CHANNEL f2 =====  
CPDPRG2 waltz16  
NUC2 1H  
PCPD2 80.00 usec  
PL2 2.00 dB  
PL12 17.46 dB  
PL13 17.46 dB  
PL2W 16.79986763 W  
PL12W 0.47786582 W  
PL13W 0.47786582 W  
SFO2 500.1320005 MHz  
SI 32768  
SF 125.7577777 MHz  
WDW EM  
SSB 0  
LB 2.00 Hz  
GB 0  
PC 1.40

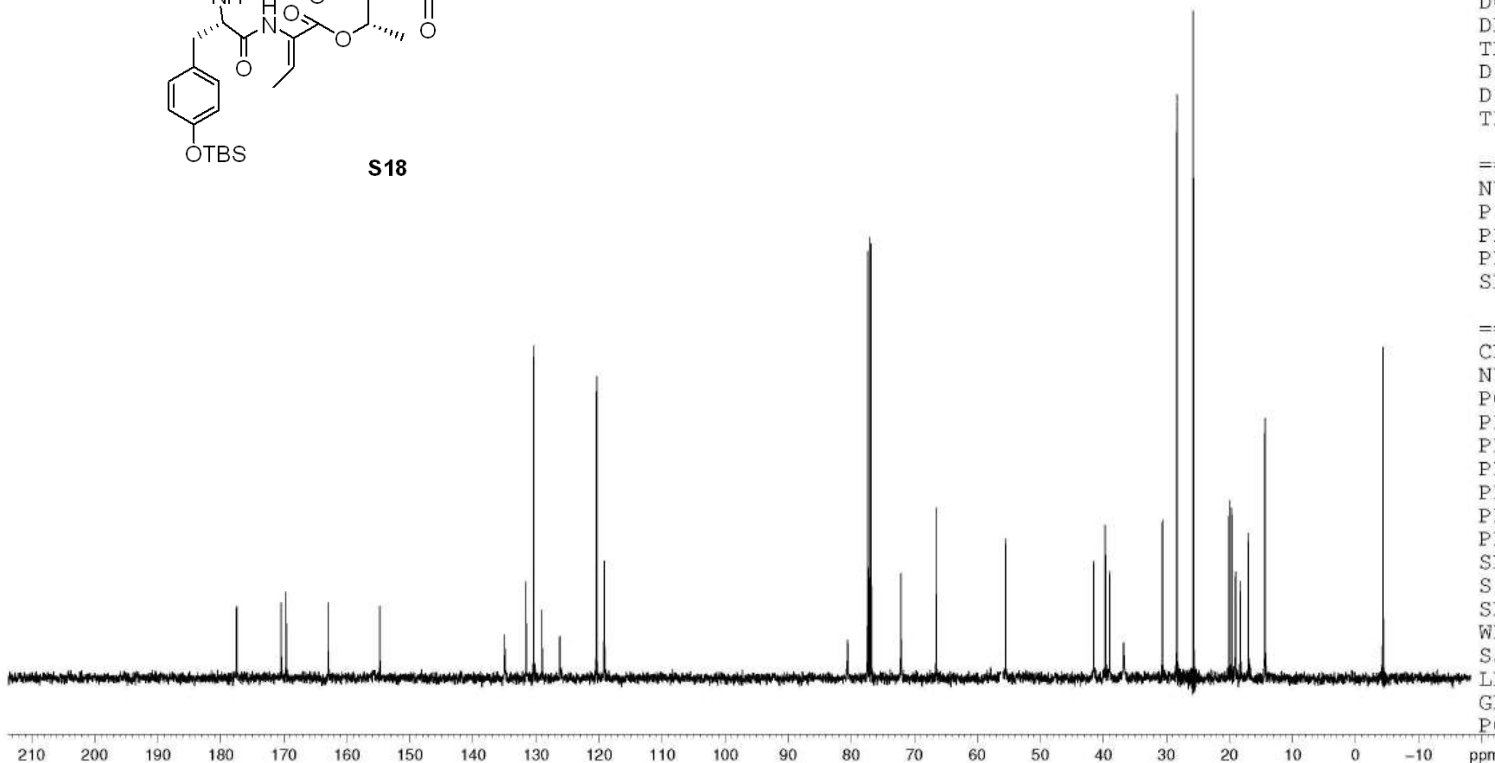



liushouxin XH-SR-DT-4

178.29  
172.31  
170.77  
169.51  
163.34  
156.79  
155.05

135.49  
132.29  
130.38  
129.10  
128.08  
120.62  
118.49

80.80  
77.41  
77.16  
76.91  
66.66  
62.39  
55.26  
54.23  
41.63  
39.97  
38.31  
35.84  
30.72  
29.91  
28.27  
25.80  
20.18  
19.66  
19.25  
19.15  
18.89  
18.33  
16.72  
14.43  
13.42  
-4.30

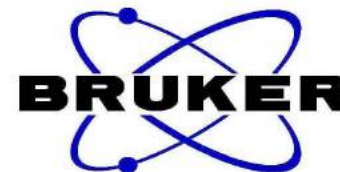

NAME 2021.05.27  
EXPNO 40  
PROCNO 1  
Date\_ 20210528  
Time 11.04  
INSTRUM spect  
PROBHD 5 mm PADUL 13C  
PULPROG zgpg30  
TD 10240  
SOLVENT CDC13  
NS 775  
DS 4  
SWH 29761.904 Hz  
FIDRES 2.906436 Hz  
AQ 0.1720820 sec  
RG 2050  
DW 16.800 usec  
DE 6.50 usec  
TE 297.6 K  
D1 2.00000000 sec  
D11 0.03000000 sec  
TD0 1

===== CHANNEL f1 =====  
NUC1 13C  
P1 12.00 usec  
PL1 4.50 dB  
PL1W 33.60015869 W  
SFO1 125.7703643 MHz

===== CHANNEL f2 =====  
CPDPRG2 waltz16  
NUC2 1H  
PCPD2 80.00 usec  
PL2 2.00 dB  
PL12 17.46 dB  
PL13 17.46 dB  
PL2W 16.79986763 W  
PL12W 0.47786582 W  
PL13W 0.47786582 W  
SFO2 500.1320005 MHz  
SI 32768  
SF 125.7577736 MHz  
WDW EM  
SSB 0  
LB 3.00 Hz  
GB 0  
PC 1.40

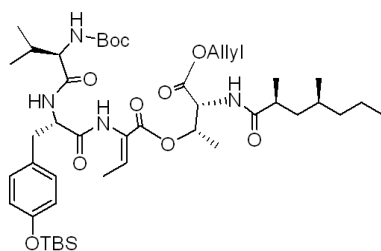

S19

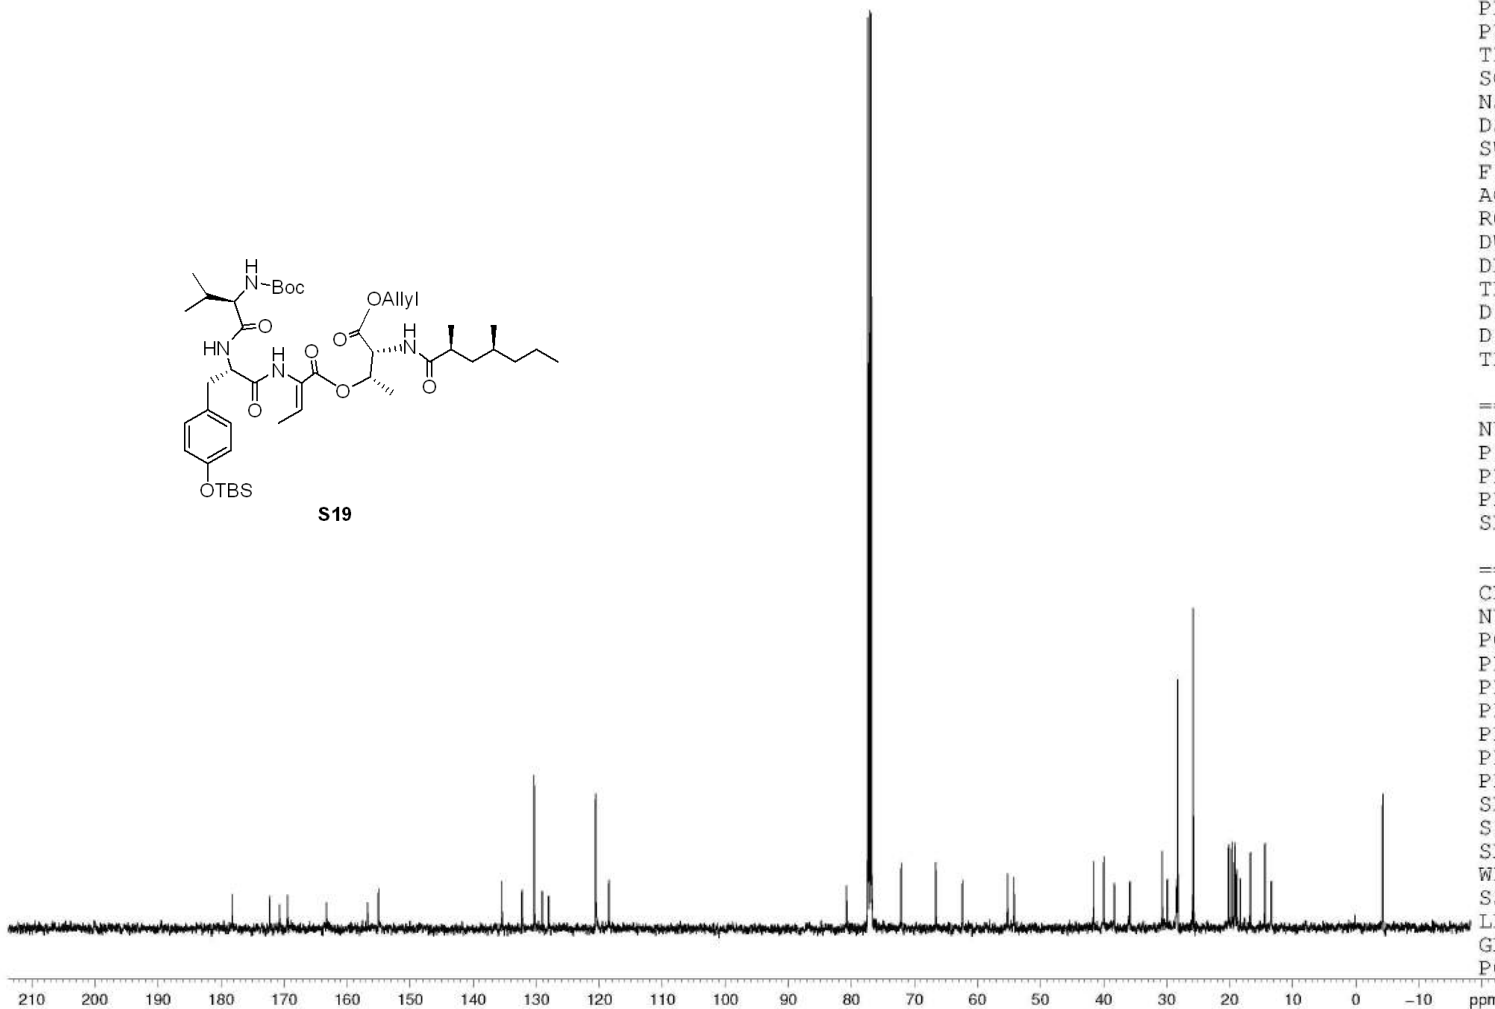



liushouxin-xh-SR-DT-5

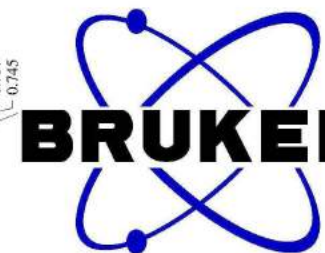

NAME 2021.05.27  
 EXPNO 6  
 PROCNO 1  
 Date\_ 20210527  
 Time 15.07  
 INSTRUM spect  
 PROBHD 5 mm PADUL 13C  
 PULPROG zg30  
 TD 65536  
 SOLVENT CDCl3  
 NS 8  
 DS 0  
 SWH 9014.423  
 FIDRES 0.137549  
 AQ 3.6351135  
 RG 64  
 DW 55.467  
 DE 6.50  
 TE 296.8  
 D1 1.00000000  
 TD0 1

===== CHANNEL f1 =====  
 NUC1 1H  
 P1 13.50  
 PL1 2.00  
 PL1W 16.79986763  
 SFO1 500.1340010  
 SI 32768  
 SF 500.1300228  
 WDW EM  
 SSB 0  
 LB 0.30  
 GB 0  
 PC 1.00

8.081 7.260 7.089 7.072 6.780 6.755 6.740 6.726 6.723 6.713 6.511 6.496 5.923 5.902 5.888 5.868 5.803 5.494 5.315 5.312 5.280 5.277 5.206 5.185 5.060 5.046 4.921 4.916 4.901 4.897 4.732 4.721 4.652 4.640 4.038 4.025 3.751 3.738 3.724 3.260 3.249 3.231 3.220 2.029 1.797 1.688 1.673 1.554 1.541 1.472 1.457 1.429 1.385 1.362 1.350 1.345 1.334 1.321 1.312 1.305 1.299 1.252 1.239 1.225 1.133 1.119 1.093 1.077 1.066 1.056 1.047 1.039 1.029 0.956 0.920 0.915 0.907 0.902 0.868 0.855 0.843 0.832 0.819 0.757 0.745

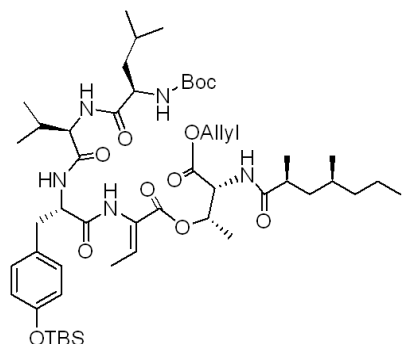

S20

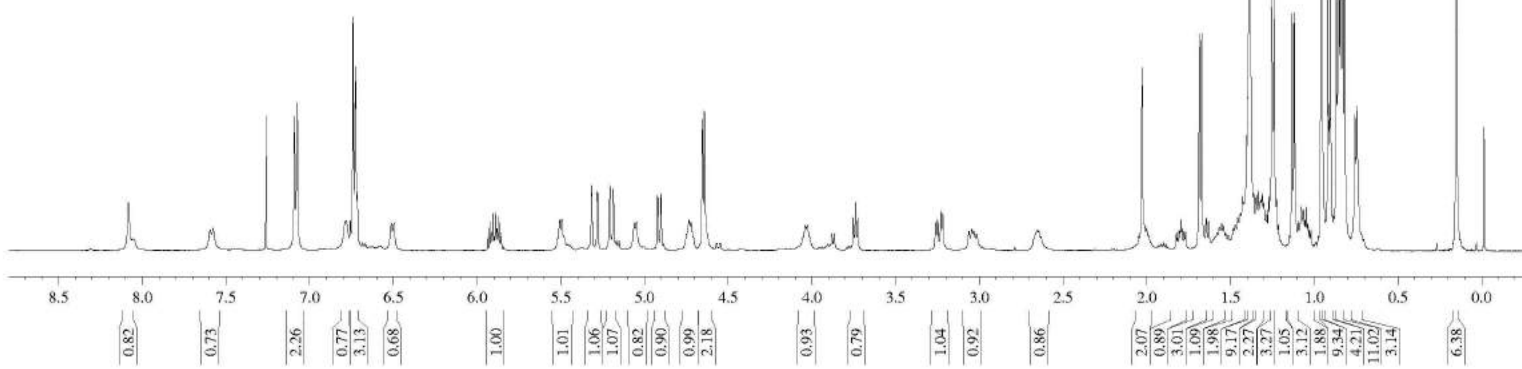

liushouxin-xh-SR-DT-5

177.97  
173.87  
171.67  
169.88  
169.84  
163.16  
156.16  
154.84

135.21  
131.99  
130.22  
129.48  
127.17  
120.44  
118.81

80.69  
77.41  
77.16  
76.90  
71.71  
66.55  
60.94  
55.35  
55.07  
52.99  
41.53  
40.27  
39.92  
38.57  
35.92  
30.70  
29.63  
28.39  
25.78  
24.69  
22.87  
22.07  
20.10  
19.63  
19.17  
19.07  
18.50  
18.29  
17.06  
14.40  
14.00  
-4.34



NAME 2021.05.27  
EXPNO 17  
PROCNO 1  
Date\_ 20210527  
Time 20.03  
INSTRUM spect  
PROBHD 5 mm PADUL 13C  
PULPROG zgpg30  
TD 32768  
SOLVENT CDC13  
NS 2048  
DS 0  
SWH 29761.904 Hz  
FIDRES 0.908261 Hz  
AQ 0.5505524 sec  
RG 2050  
DW 16.800 usec  
DE 6.50 usec  
TE 299.5 K  
D1 2.0000000 sec  
D11 0.0300000 sec  
TD0 1

===== CHANNEL f1 =====  
NUC1 13C  
P1 12.00 usec  
PL1 4.50 dB  
PL1W 33.60015869 W  
SFO1 125.7703643 MHz

===== CHANNEL f2 =====  
CPDPRG2 waltz16  
NUC2 1H  
PCPD2 80.00 usec  
PL2 2.00 dB  
PL12 17.46 dB  
PL13 17.46 dB  
PL2W 16.79986763 W  
PL12W 0.47786582 W  
PL13W 0.47786582 W  
SFO2 500.1320005 MHz  
SI 32768  
SF 125.7577756 MHz  
WDW EM  
SSB 0  
LB 1.00 Hz  
GB 0  
PC 1.40

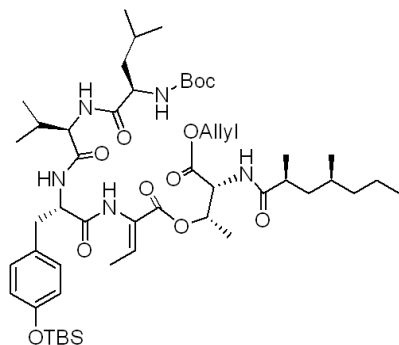

S20

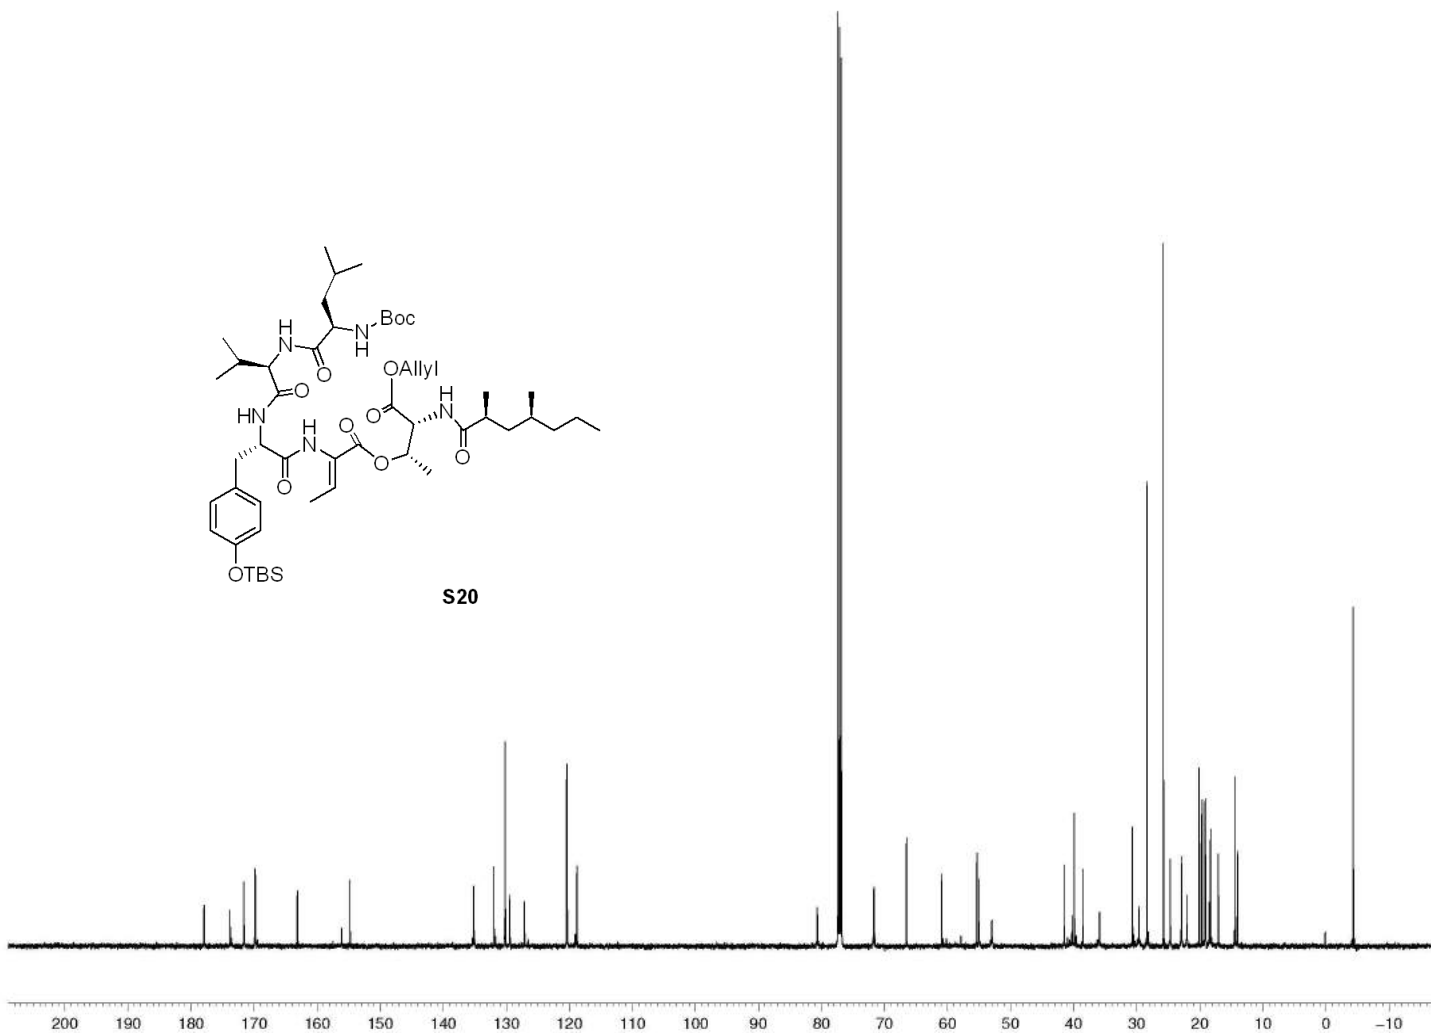

liushouxin-xh-SR-1D-TBAF

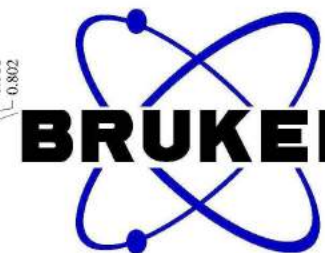

8.465 8.451 8.415 7.886 7.410 7.395 7.232 7.215 7.071 7.053 6.769 6.752 6.590 6.576 5.349 5.215 4.890 4.884 4.872 4.866 4.202 3.349 3.337 3.294 3.287 3.265 3.259 3.030 3.005 2.842 2.454 2.441 2.162 2.147 2.132 2.059 2.055 2.050 2.046 2.042 2.042 1.714 1.700 1.685 1.676 1.669 1.658 1.651 1.590 1.580 1.574 1.563 1.552 1.379 1.366 1.290 1.224 1.224 1.213 1.206 1.196 1.186 1.176 1.073 1.060 1.044 1.037 1.028 1.018 1.011 0.994 0.981 0.967 0.958 0.945 0.933 0.919 0.904 0.891 0.879 0.865 0.829 0.824 0.815 0.811 0.802

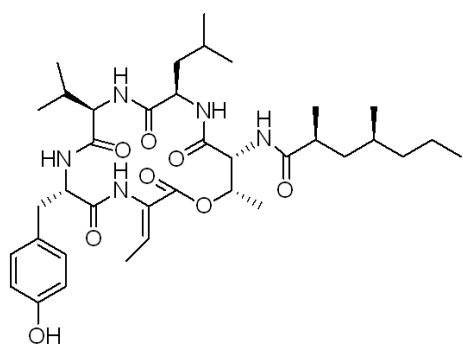

38

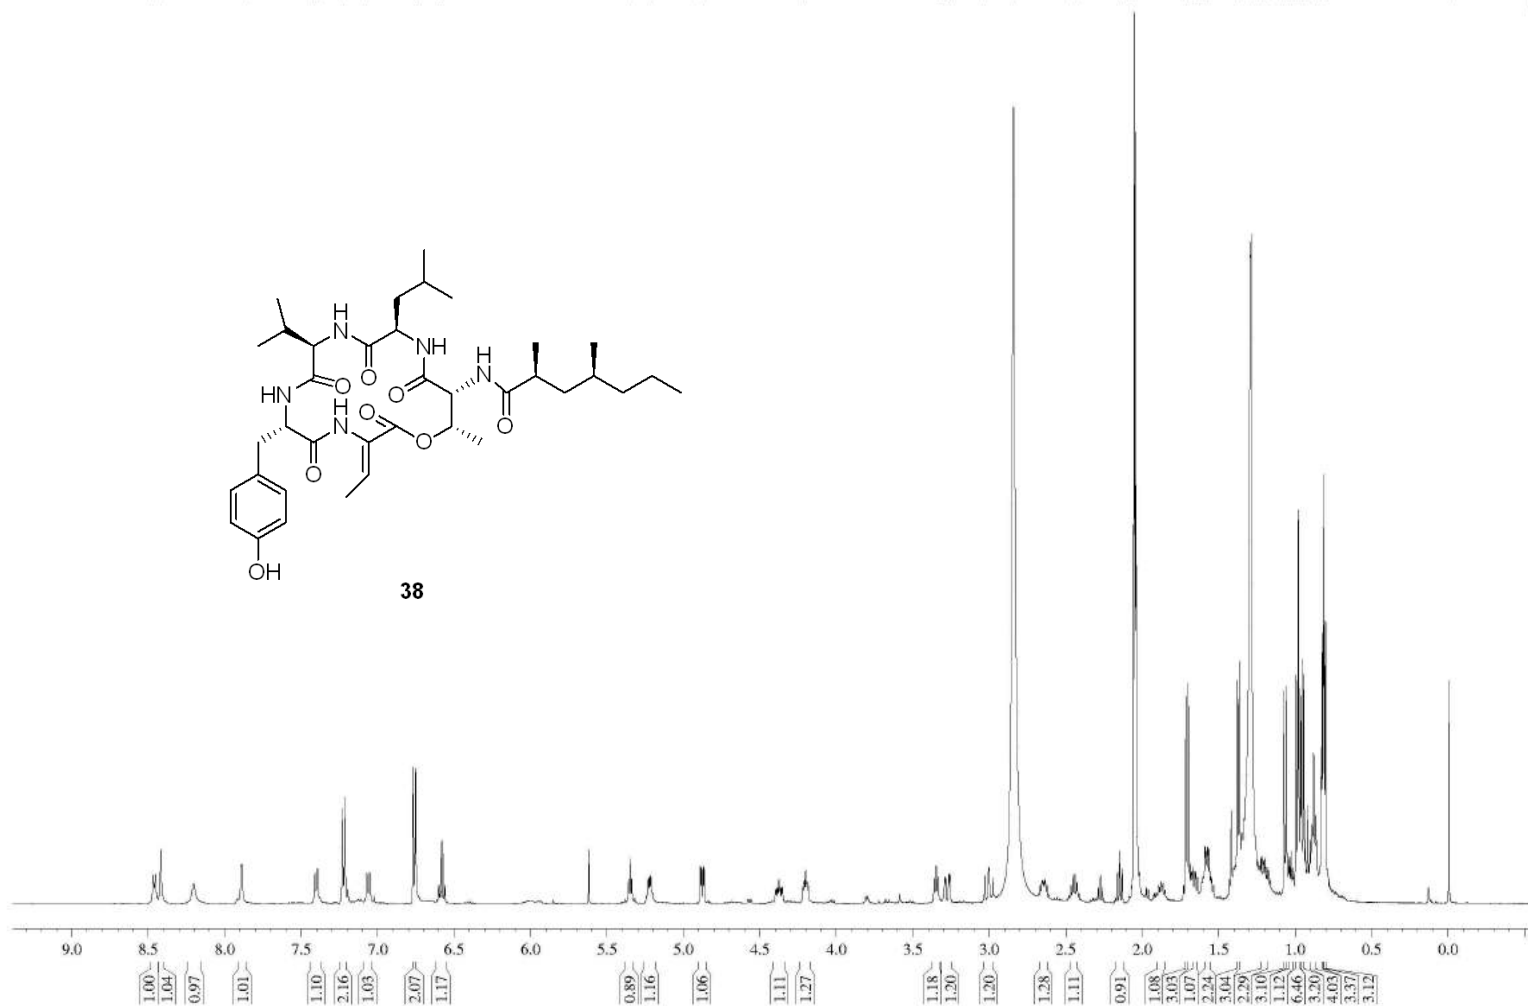

NAME 2021.05.31  
 EXPNO 2  
 PROCNO 1  
 Date\_ 20210531  
 Time 13.11  
 INSTRUM spect  
 PROBHD 5 mm PADUL 13C  
 PULPROG zg30  
 TD 65536  
 SOLVENT Acetone  
 NS 128  
 DS 0  
 SWH 9014.423  
 FIDRES 0.137549  
 AQ 3.6351135  
 RG 287  
 DW 55.467  
 DE 6.50  
 TE 297.2  
 D1 1.00000000  
 TD0 1

==== CHANNEL f1 ===  
 NUC1 1H  
 P1 13.50  
 PL1 2.00  
 PL1W 16.79986763  
 SFO1 500.1340010  
 SI 32768  
 SF 500.1300145  
 WDW EM  
 SSB 0  
 LB 0.30  
 GB 0  
 PC 1.00

liushouxin XH-SR-1D-TBAF

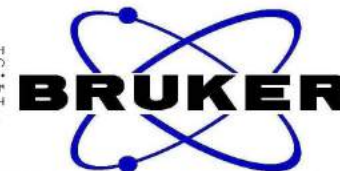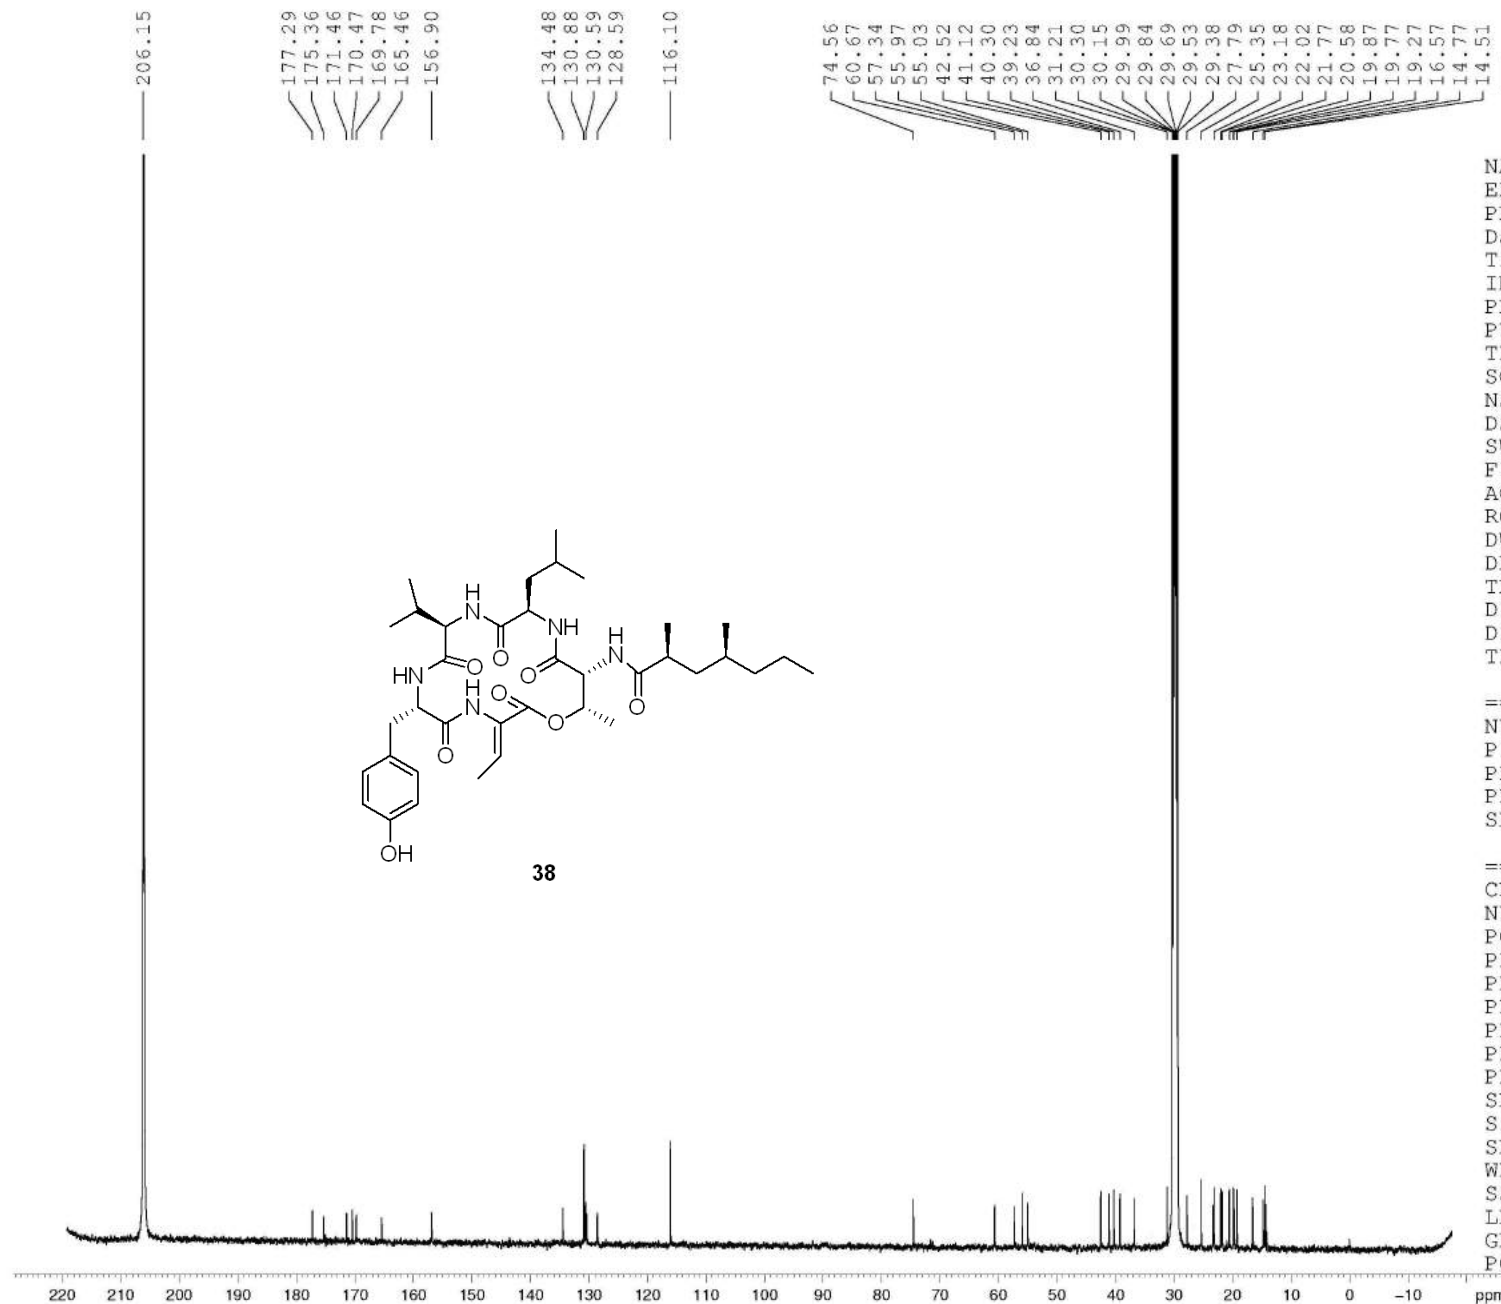

```

NAME      2021.05.31
EXPNO     19
PROCNO    1
Date_     20210602
Time      8.18
INSTRUM   spect
PROBHD    5 mm PADUL 13C
PULPROG   zgpg30
TD        32768
SOLVENT   Acetone
NS        15360
DS        0
SWH       29761.904 Hz
FIDRES    0.908261 Hz
AQ        0.5505524 sec
RG        2050
DW        16.800 usec
DE        6.50 usec
TE        300.2 K
D1        2.00000000 sec
D11       0.03000000 sec
TD0       1
    
```

```

===== CHANNEL f1 =====
NUC1      13C
P1        12.00 usec
PL1       4.50 dB
PL1W      33.60015869 W
SFO1      125.7703643 MHz
    
```

```

===== CHANNEL f2 =====
CPDPRG2   waltz16
NUC2      1H
PCPD2     80.00 usec
PL2       2.00 dB
PL12      17.46 dB
PL13      17.46 dB
PL2W      16.79986763 W
PL12W     0.47786582 W
PL13W     0.47786582 W
SFO2      500.1320005 MHz
SI        32768
SF        125.7576749 MHz
WDW       EM
SSB       0
LB        3.00 Hz
GB        0
PC        1.40
    
```





liushouxin XH-SR-4D-4

178.10  
171.33  
169.79  
169.46  
163.13  
156.70  
155.09  
136.00  
132.07  
130.36  
128.73  
126.89  
120.58  
118.73

81.32  
77.42  
77.16  
76.91  
72.30  
66.45  
61.58  
55.22  
53.82  
41.72  
39.98  
38.25  
35.98  
30.51  
29.98  
28.20  
25.74  
20.10  
19.67  
19.62  
19.34  
18.26  
17.73  
16.60  
14.48  
14.10  
-4.33



NAME 2021.05.27  
EXPNO 42  
PROCNO 1  
Date\_ 20210528  
Time 13.00  
INSTRUM spect  
PROBHD 5 mm PADUL 13C  
PULPROG zgpg30  
TD 10240  
SOLVENT CDC13  
NS 2048  
DS 4  
SWH 29761.904 Hz  
FIDRES 2.906436 Hz  
AQ 0.1720820 sec  
RG 2050  
DW 16.800 usec  
DE 6.50 usec  
TE 299.4 K  
D1 2.00000000 sec  
D11 0.03000000 sec  
TD0 1

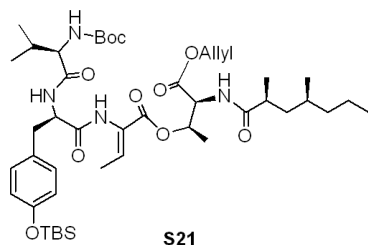

===== CHANNEL f1 =====  
NUC1 13C  
P1 12.00 usec  
PL1 4.50 dB  
PL1W 33.60015869 W  
SFO1 125.7703643 MHz

===== CHANNEL f2 =====  
CPDPRG2 waltz16  
NUC2 1H  
PCPD2 80.00 usec  
PL2 2.00 dB  
PL12 17.46 dB  
PL13 17.46 dB  
PL2W 16.79986763 W  
PL12W 0.47786582 W  
PL13W 0.47786582 W  
SFO2 500.1320005 MHz  
SI 32768  
SF 125.7577747 MHz  
WDW EM  
SSB 0  
LB 3.00 Hz  
GB 0  
PC 1.40

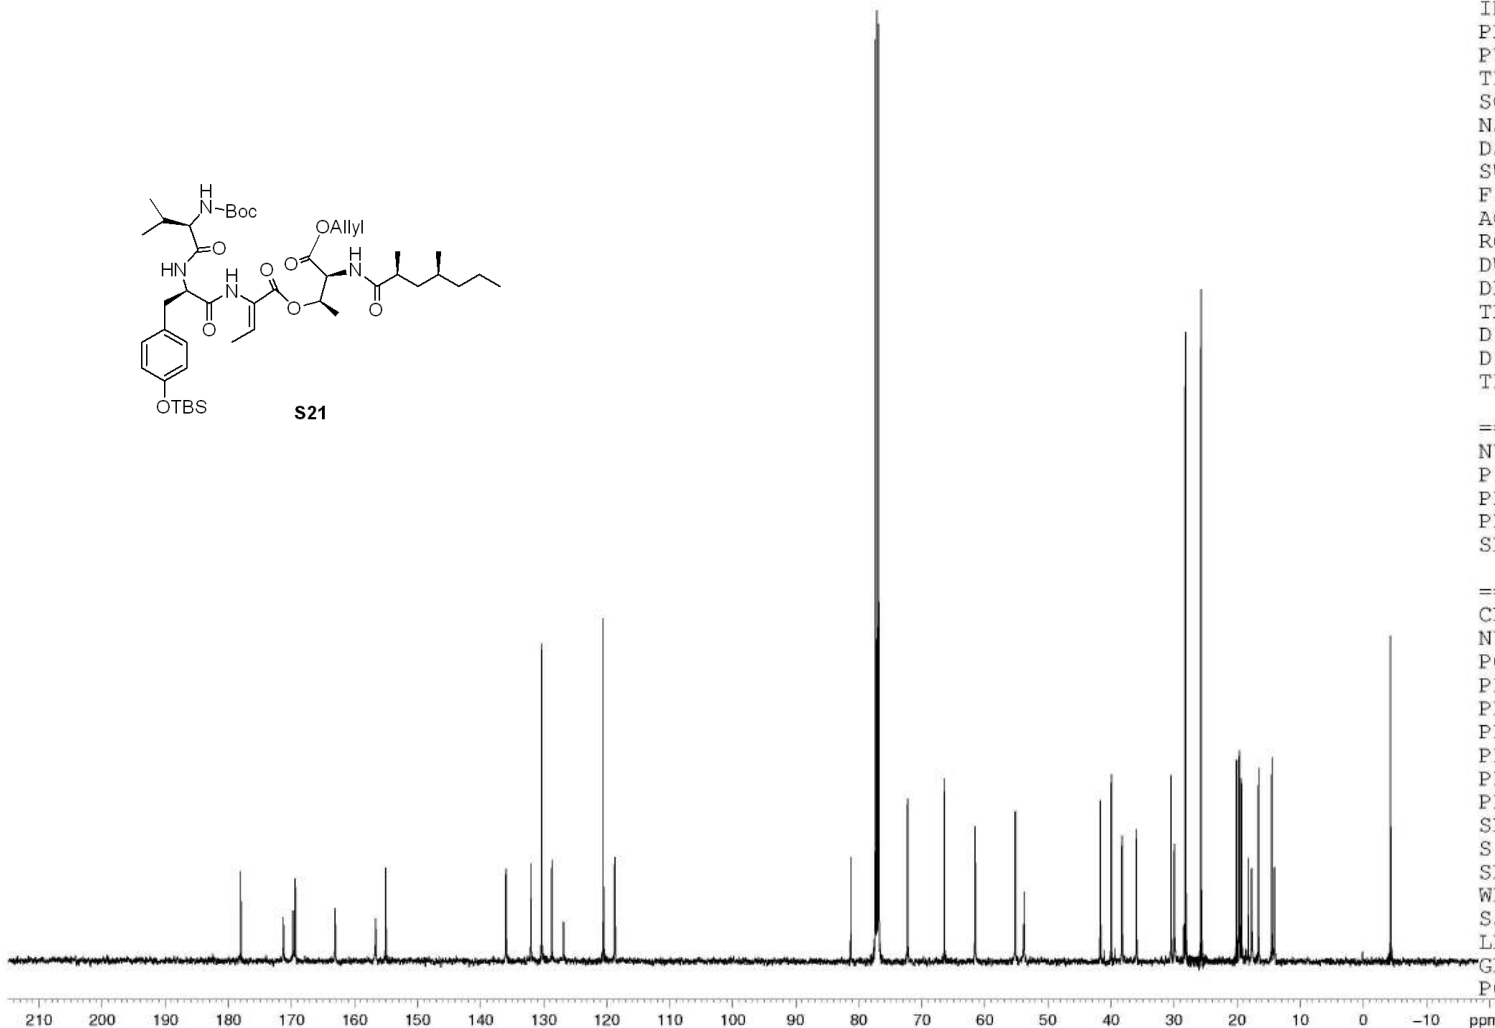



liushouxin-xh-SR-4D-5D

178.24  
174.53  
170.80  
170.75  
169.37  
163.42  
156.75  
154.50  
134.82  
132.28  
130.05  
129.75  
127.78  
120.24  
118.45

81.50  
77.41  
77.16  
76.90  
72.16  
66.51  
60.68  
55.13  
54.48  
53.96  
41.74  
39.98  
38.08  
35.69  
30.48  
29.28  
28.37  
25.77  
24.89  
22.95  
21.69  
20.09  
19.65  
19.61  
19.19  
18.30  
17.54  
16.77  
14.45  
13.64  
-4.37

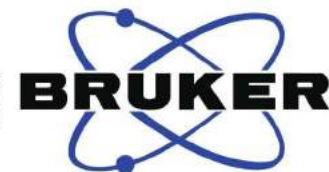

Current Data Parameters  
NAME Desktop  
EXPNO 2  
PROCNO 1

F2 - Acquisition Parameters

Date\_ 20210627  
Time 12.12  
INSTRUM spect  
PROBHD 5 mm PADUL 13C  
PULPROG zgpg30  
TD 32768  
SOLVENT CDCl3  
NS 4864  
DS 0  
SWH 29761.904 Hz  
FIDRES 0.908261 Hz  
AQ 0.5505024 sec  
RG 2050  
DW 16.800 usec  
DE 6.50 usec  
TE 299.0 K  
D1 2.00000000 sec  
D11 0.03000000 sec  
TD0 1

===== CHANNEL f1 =====  
NUC1 13C  
P1 12.00 usec  
PL1 4.50 dB  
PL1W 33.60015869 W  
SFO1 125.7703643 MHz

===== CHANNEL f2 =====  
CPDPRG[2] waltz16  
NUC2 1H  
PCPD2 80.00 usec  
PL2 2.00 dB  
PL12 17.46 dB  
PL13 17.46 dB  
PL2W 16.79986763 W  
PL12W 0.47786582 W  
PL13W 0.47786582 W  
SFO2 500.1320005 MHz

F2 - Processing parameters  
SI 32768  
SF 125.7577776 MHz  
WDW EM  
SSB 0  
LB 1.00 Hz  
GB 0  
PC 1.40

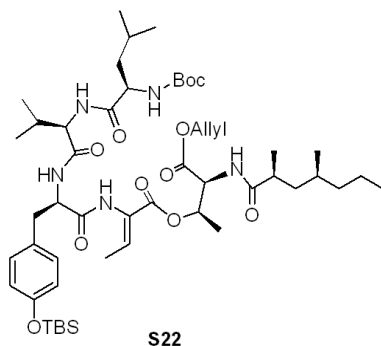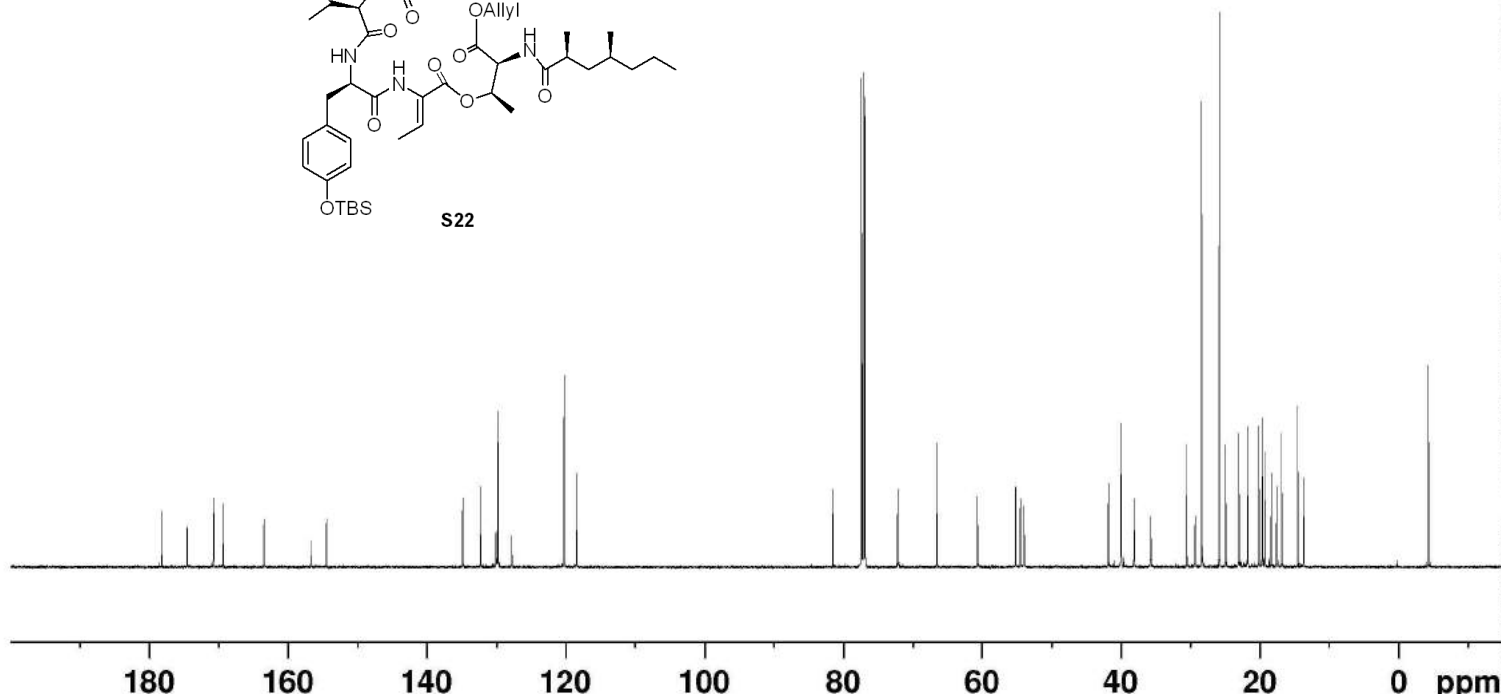



liushouxin-xh-SR-4D-5D-TBAF

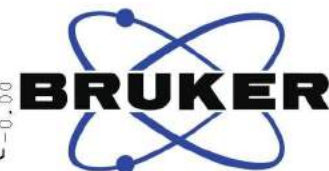

8.16  
8.11  
8.07  
7.79  
7.20  
7.18  
6.77  
6.75  
6.64  
6.62  
6.61  
5.23  
4.77  
4.48  
4.05  
3.86  
3.35  
3.32  
3.32  
3.03  
3.00  
2.97  
2.86  
2.72  
2.70  
2.05  
2.05  
2.03  
2.01  
1.76  
1.69  
1.67  
1.66  
1.61  
1.60  
1.49  
1.42  
1.38  
1.37  
1.35  
1.33  
1.29  
1.25  
1.24  
1.22  
1.21  
1.19  
1.16  
1.15  
1.03  
0.96  
0.94  
0.93  
0.92  
0.90  
0.88  
0.87  
0.85  
0.84  
0.82  
0.73  
0.72  
0.68  
0.67  
-0.00

Current Data Parameters  
NAME Desktop  
EXPNO 3  
PROCNO 1

F2 - Acquisition Parameters  
Date\_ 20210625  
Time 17.40  
INSTRUM spect  
PROBHD 5 mm PADUL 13C  
PULPROG zg30  
TD 65536  
SOLVENT Acetone  
NS 64  
DS 0  
SWH 8012.820 Hz  
FIDRES 0.122266 Hz  
AQ 4.0894465 sec  
RG 256  
DW 62.400 usec  
DE 6.50 usec  
TE 296.9 K  
D1 1.00000000 sec  
TD0 1

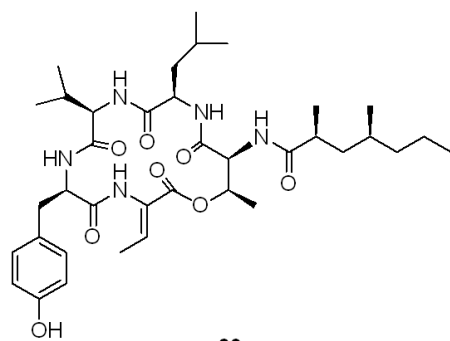

===== CHANNEL f1 =====  
NUC1 1H  
P1 13.50 usec  
PL1 2.00 dB  
PL1W 16.79986763 W  
SFO1 500.1335009 MHz

F2 - Processing parameters  
SI 32768  
SF 500.1300125 MHz  
WDW EM  
SSB 0  
LB 0.30 Hz  
GB 0  
PC 1.00

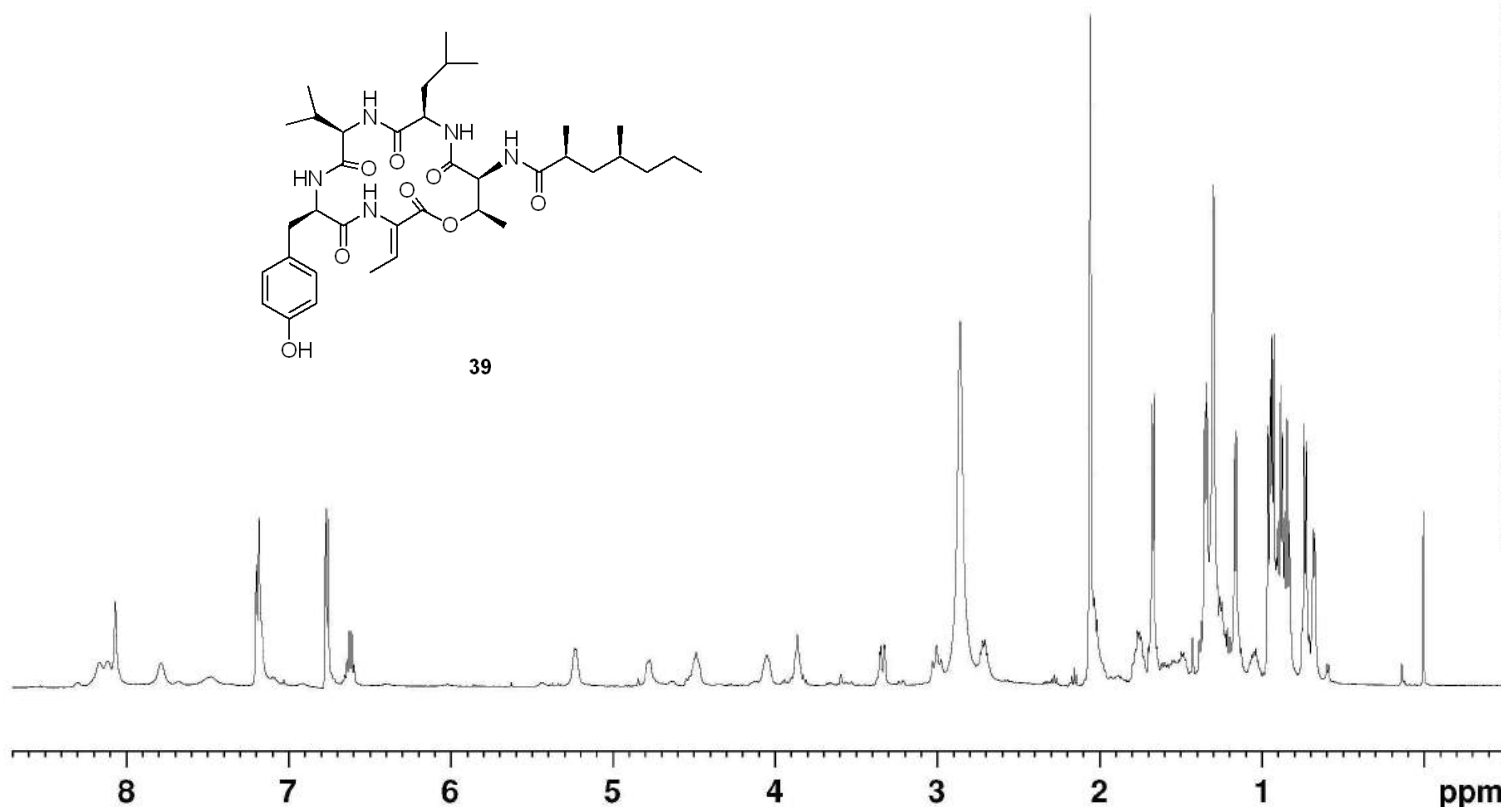

1.30  
1.35  
0.80  
0.68  
2.97  
2.34  
1.03  
0.96  
0.77  
1.14  
1.00  
1.16  
1.01  
1.39  
1.69  
2.00  
1.82  
2.13  
2.87  
1.19  
1.39  
2.93  
2.12  
2.80  
1.19  
3.01  
3.23  
4.10  
3.22  
2.91  
2.91

S149

liushouxin-xh-SR-4D-5D-TBAF

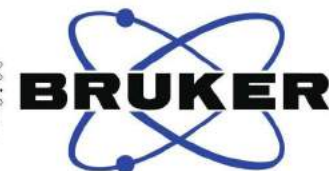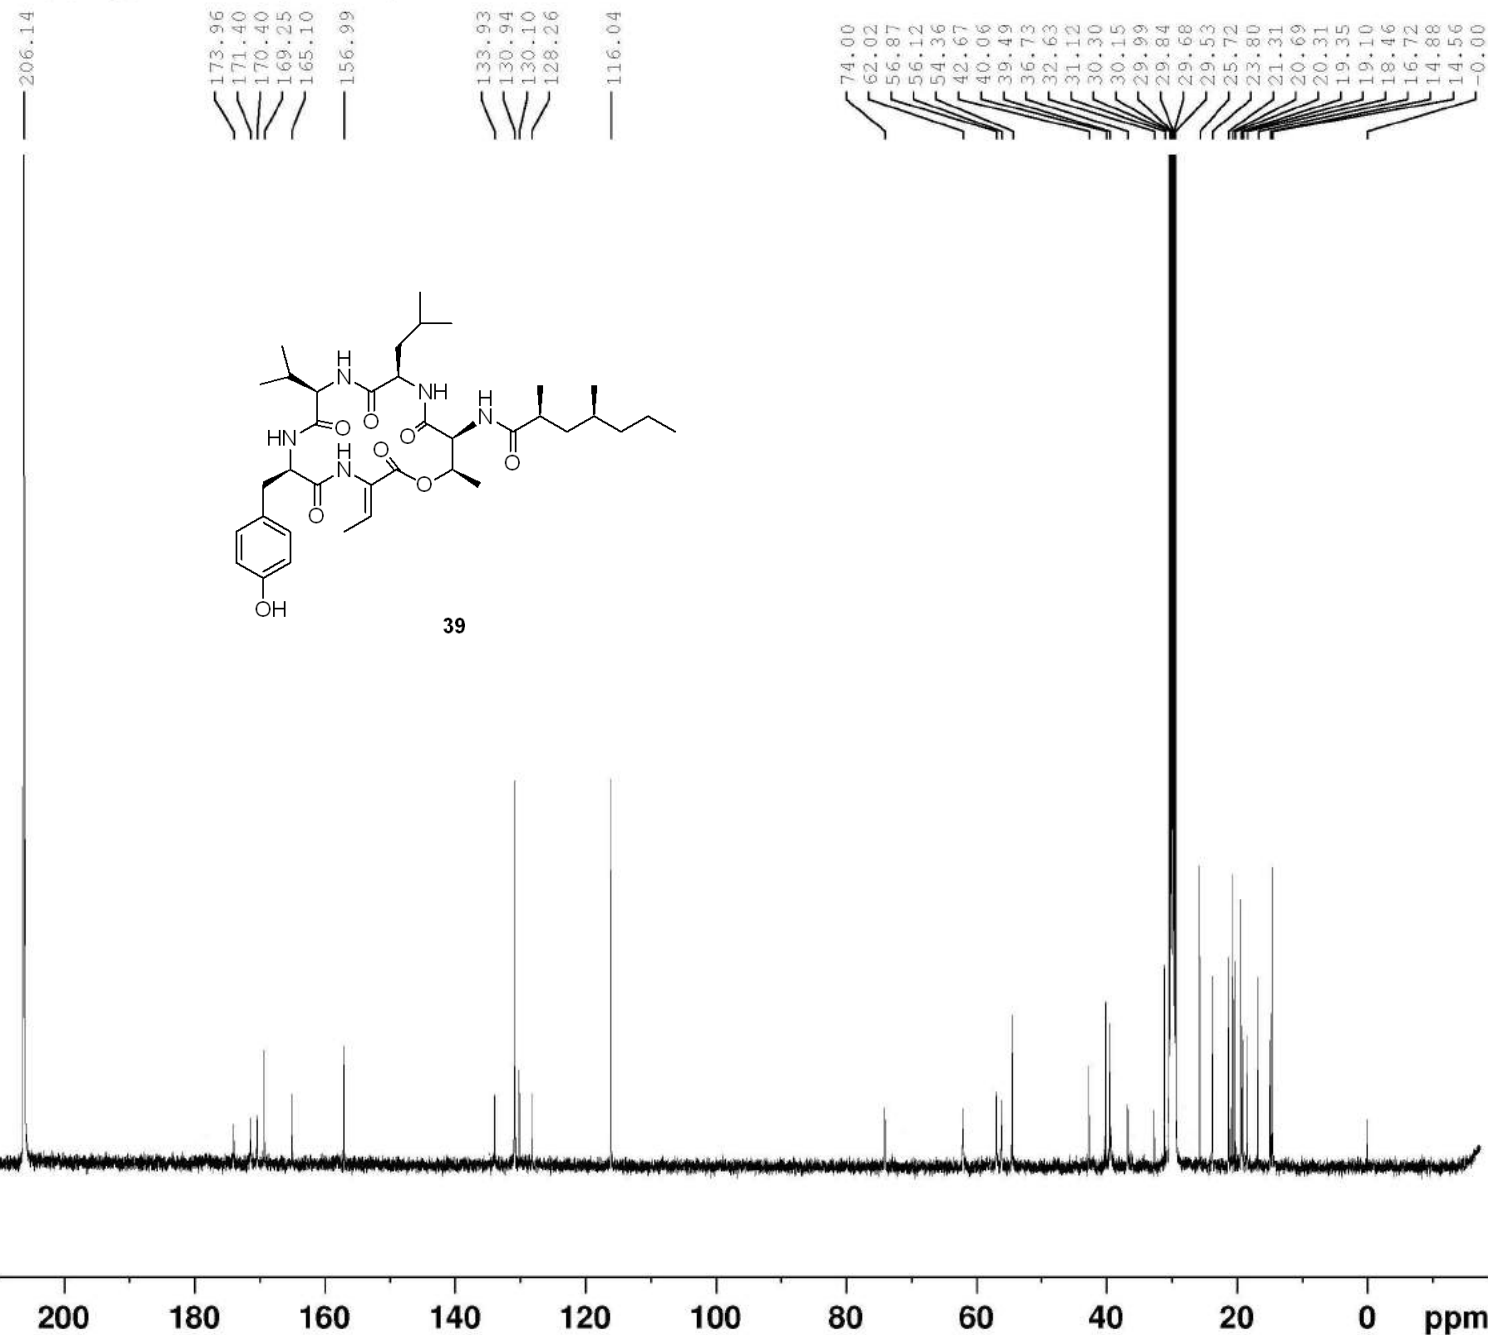

206.14  
173.96  
171.40  
170.40  
169.25  
165.10  
156.99  
133.93  
130.94  
130.10  
128.26  
116.04  
74.00  
62.02  
56.87  
56.12  
54.36  
42.67  
40.06  
39.49  
36.73  
32.63  
31.12  
30.30  
30.15  
29.99  
29.84  
29.68  
29.53  
25.72  
23.80  
21.31  
20.69  
20.31  
19.35  
19.10  
18.46  
16.72  
14.88  
14.56  
-0.00

Current Data Parameters  
NAME Desktop  
EXPNO 4  
PROCNO 1

F2 - Acquisition Parameters

Date\_ 20210625  
Time 17.58  
INSTRUM spect  
PROBHD 5 mm PADUL 13C  
PULPROG zgpg30  
TD 32768  
SOLVENT Acetone  
NS 15360  
DS 0  
SWH 29761.904 Hz  
FIDRES 0.908261 Hz  
AQ 0.5505024 sec  
RG 2050  
DW 16.800 usec  
DE 6.50 usec  
TE 299.0 K  
D1 2.00000000 sec  
D11 0.03000000 sec  
TD0 1

===== CHANNEL f1 =====  
NUC1 13C  
P1 12.00 usec  
PL1 4.50 dB  
PL1W 33.60015869 W  
SFO1 125.7703643 MHz

===== CHANNEL f2 =====  
CPDPRG[2] waltz16  
NUC2 1H  
PCPD2 80.00 usec  
PL2 2.00 dB  
PL12 17.46 dB  
PL13 17.46 dB  
PL2W 16.79986763 W  
PL12W 0.47786582 W  
PL13W 0.47786582 W  
SFO2 500.1320005 MHz

F2 - Processing parameters  
SI 32768  
SF 125.7576759 MHz  
WDW EM  
SSB 0  
LB 1.00 Hz  
GB 0  
PC 1.40

liushouxin-xh-SR-4D-5

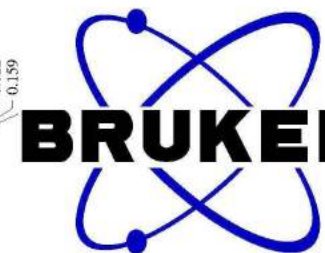

NAME 2021.05.27  
 EXPNO 8  
 PROCNO 1  
 Date\_ 20210527  
 Time 15.19  
 INSTRUM spect  
 PROBHD 5 mm PADUL 13C  
 PULPROG zg30  
 TD 65536  
 SOLVENT CDCl3  
 NS 8  
 DS 0  
 SWH 9014.423  
 FIDRES 0.137549  
 AQ 3.6351135  
 RG 64  
 DW 55.467  
 DE 6.50  
 TE 296.8  
 D1 1.00000000  
 TD0 1

===== CHANNEL f1 =====  
 NUC1 1H  
 P1 13.50  
 PL1 2.00  
 PL1W 16.79986763  
 SFO1 500.1340010  
 SI 32768  
 SF 500.1300227  
 WDW EM  
 SSB 0  
 LB 0.30  
 GB 0  
 PC 1.00

7.952 7.260 7.168 7.152 6.760 6.743 6.705 6.690 6.338 5.950 5.929 5.916 5.895 5.826 5.521 5.513 5.509 5.323 5.320 5.289 5.286 5.205 5.202 5.184 5.181 4.992 4.987 4.972 4.968 4.891 4.824 4.710 4.710 4.699 4.059 4.051 4.048 4.040 3.880 1.829 1.800 1.744 1.729 1.619 1.603 1.589 1.577 1.577 1.452 1.363 1.352 1.322 1.317 1.308 1.303 1.289 1.289 1.275 1.264 1.259 1.244 1.231 1.213 1.203 1.192 1.156 1.142 1.055 1.045 1.038 1.028 1.019 1.010 1.001 0.967 0.961 0.953 0.947 0.917 0.905 0.879 0.866 0.855 0.841 0.828 0.622 0.622 0.159

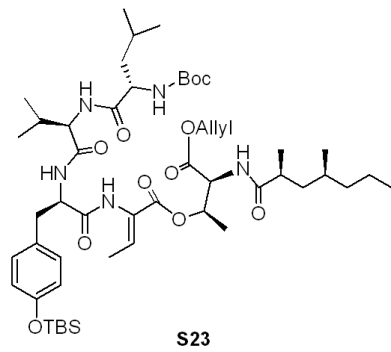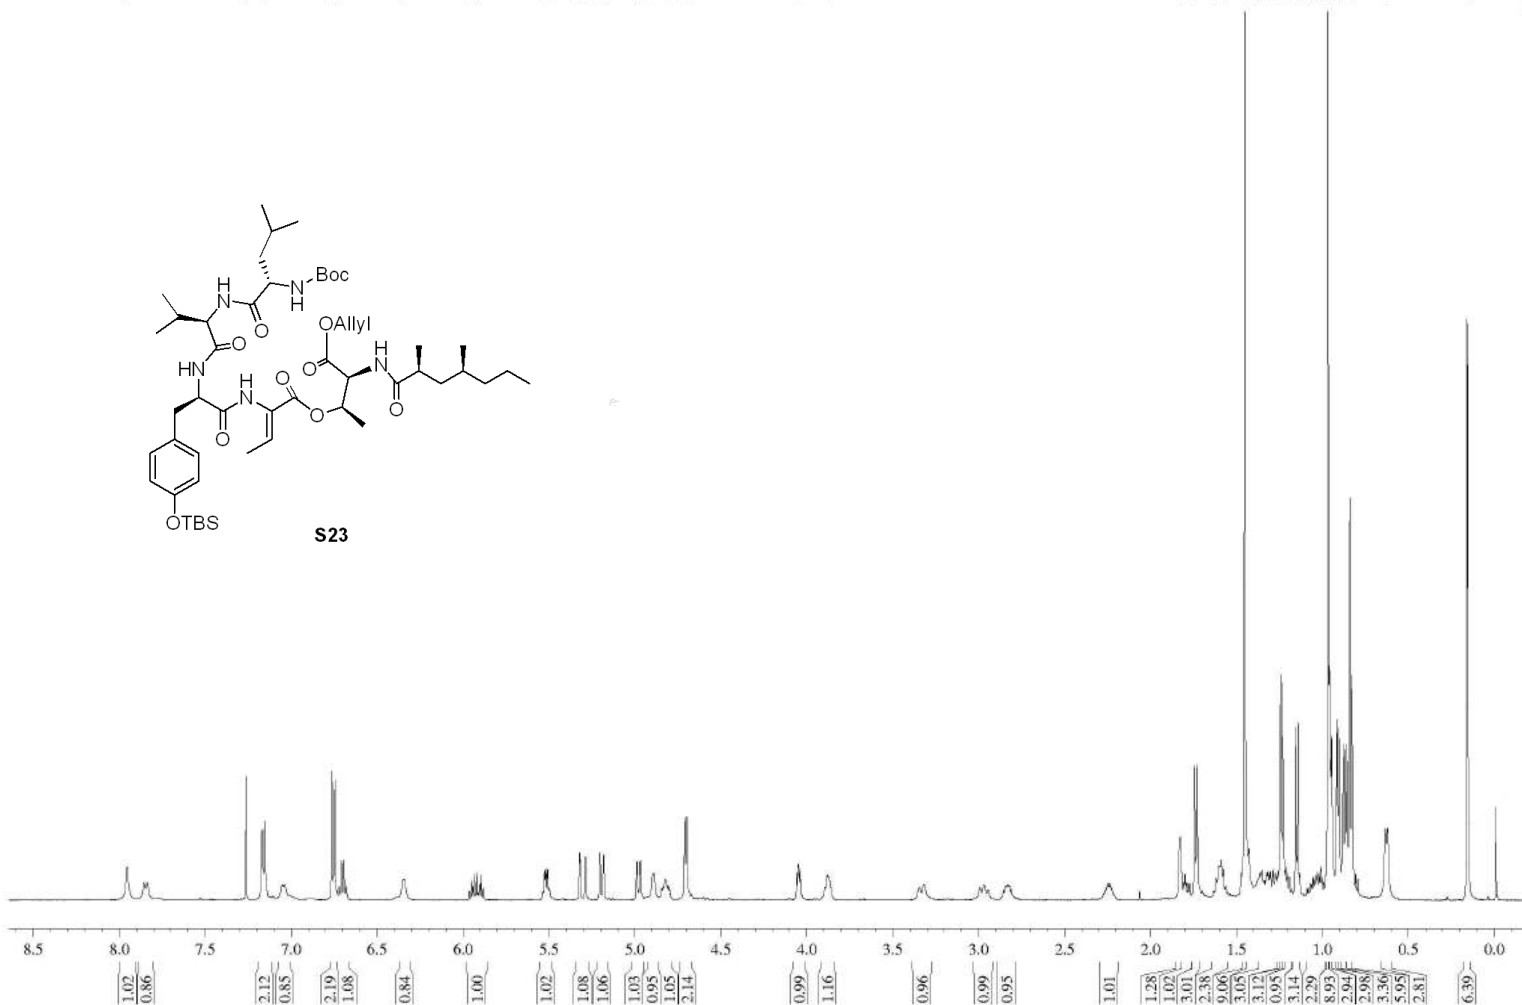

liushouxin XH-SR-4D-5

178.21  
174.66  
170.74  
170.59  
169.42  
163.42  
156.51  
154.58

134.03  
132.32  
130.60  
130.17  
127.82  
120.34  
118.53

81.25  
77.41  
77.16  
76.90  
72.29  
66.52  
60.28  
55.09  
54.85  
54.28  
41.78  
40.05  
38.16  
35.37  
30.48  
28.96  
28.62  
25.79  
24.78  
22.71  
22.31  
20.13  
19.69  
19.59  
19.43  
18.31  
16.90  
16.78  
14.48  
13.71  
-4.34



NAME 2021.05.27  
EXPNO 39  
PROCNO 1  
Date\_ 20210528  
Time 10.49  
INSTRUM spect  
PROBHD 5 mm PADUL 13C  
PULPROG zgpg30  
TD 10240  
SOLVENT CDC13  
NS 294  
DS 4  
SWH 29761.904 Hz  
FIDRES 2.906436 Hz  
AQ 0.1720820 sec  
RG 2050  
DW 16.800 usec  
DE 6.50 usec  
TE 298.1 K  
D1 2.00000000 sec  
D11 0.03000000 sec  
TD0 1

===== CHANNEL f1 =====  
NUC1 13C  
P1 12.00 usec  
PL1 4.50 dB  
PL1W 33.60015869 W  
SFO1 125.7703643 MHz

===== CHANNEL f2 =====  
CPDPRG2 waltz16  
NUC2 1H  
PCPD2 80.00 usec  
PL2 2.00 dB  
PL12 17.46 dB  
PL13 17.46 dB  
PL2W 16.79986763 W  
PL12W 0.47786582 W  
PL13W 0.47786582 W  
SFO2 500.1320005 MHz  
SI 32768  
SF 125.7577749 MHz  
WDW EM  
SSB 0  
LB 2.00 Hz  
GB 0  
PC 1.40

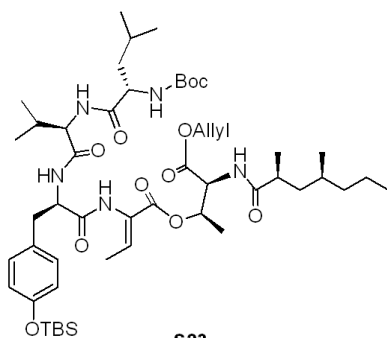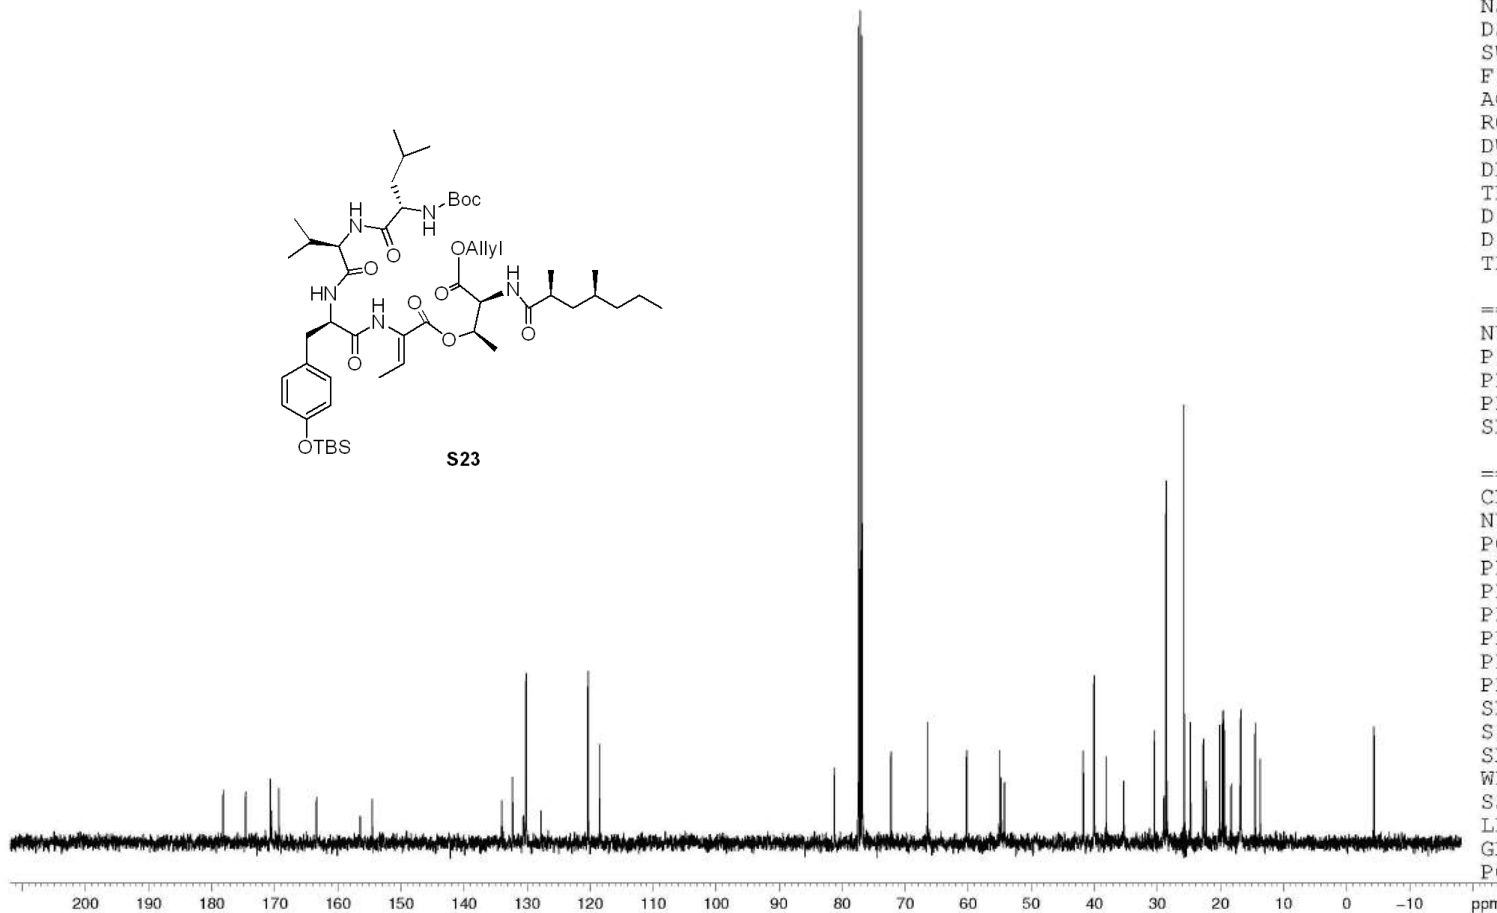





liushouxin XH-SR-4D-TBAF

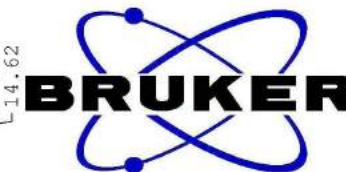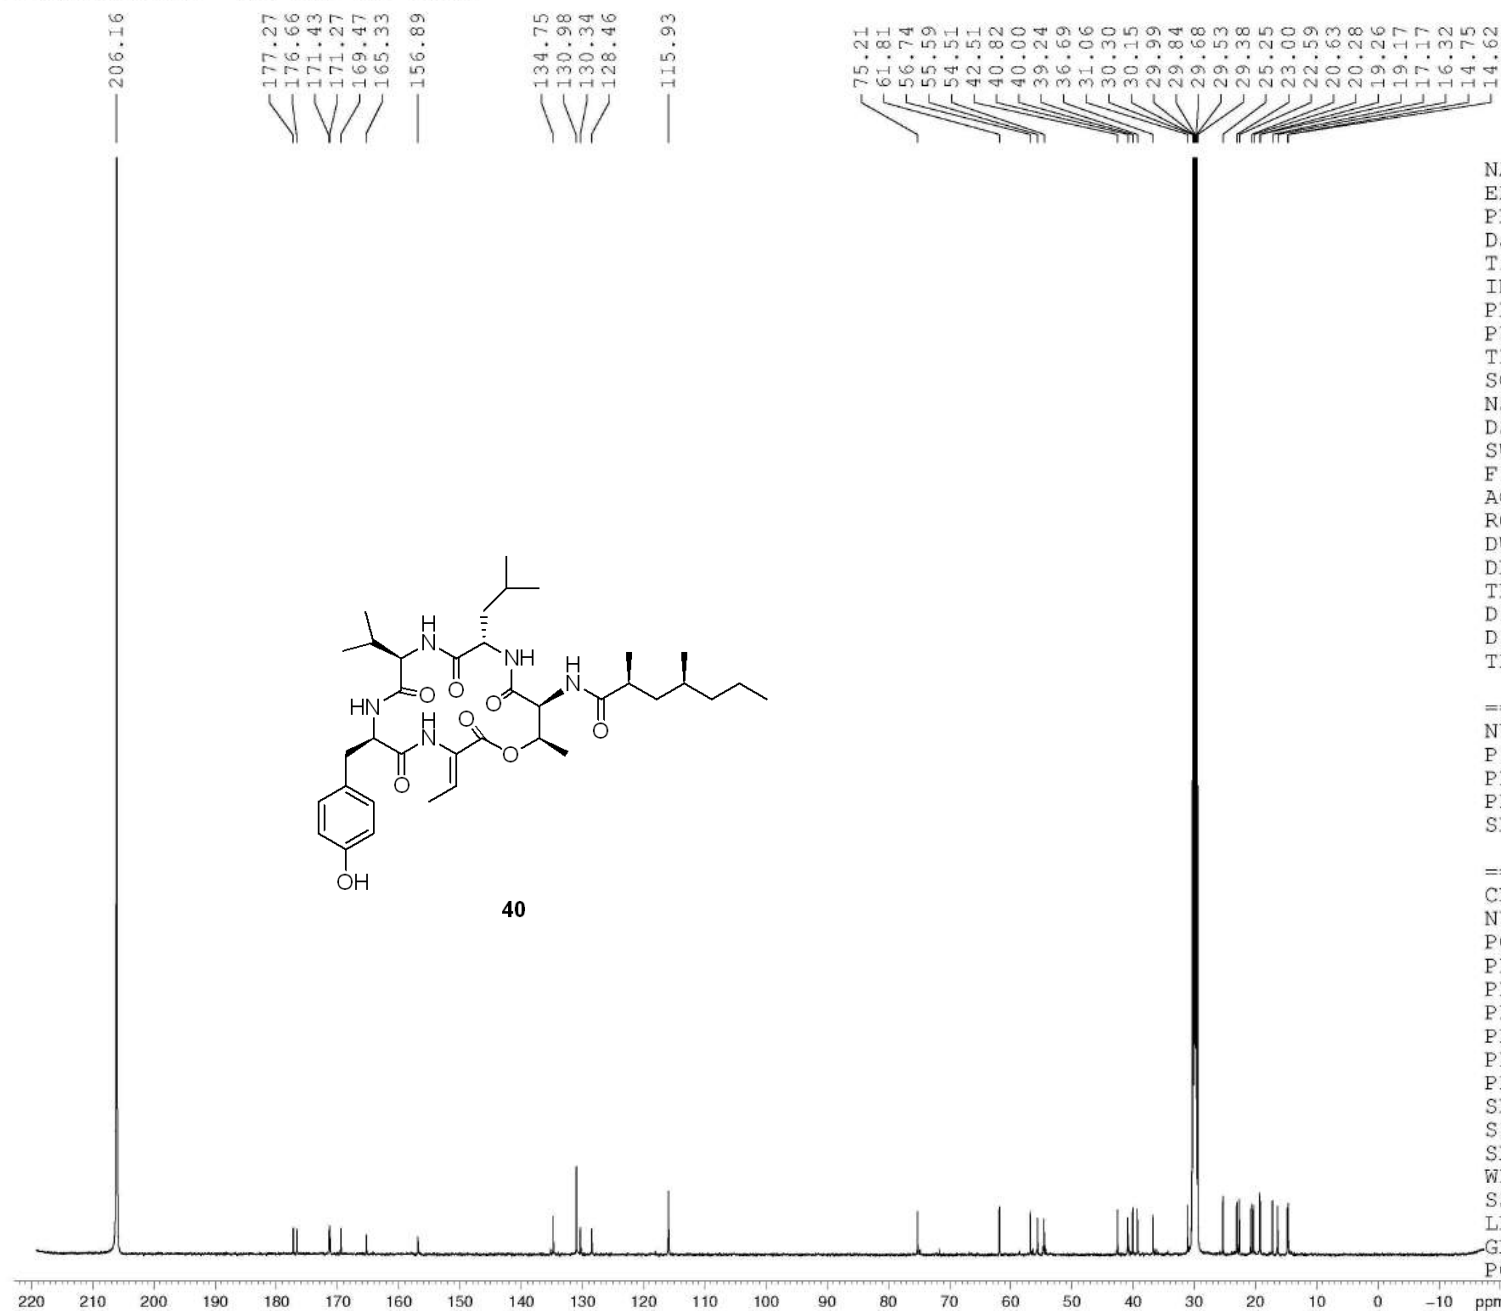

```

NAME      2021.05.31
EXPNO     17
PROCNO    1
Date_     20210601
Time      6.42
INSTRUM   spect
PROBHD    5 mm PADUL 13C
PULPROG   zgpg30
TD         32768
SOLVENT   Acetone
NS         15360
DS         0
SWH       29761.904 Hz
FIDRES    0.908261 Hz
AQ        0.5505524 sec
RG         2050
DW         16.800 usec
DE         6.50 usec
TE         300.2 K
D1         2.00000000 sec
D11        0.03000000 sec
TD0        1
  
```

```

===== CHANNEL f1 =====
NUC1      13C
P1         12.00 usec
PL1        4.50 dB
PL1W      33.60015869 W
SFO1      125.7703643 MHz
  
```

```

===== CHANNEL f2 =====
CPDPRG2   waltz16
NUC2      1H
PCPD2     80.00 usec
PL2        2.00 dB
PL12       17.46 dB
PL13       17.46 dB
PL2W      16.79986763 W
PL12W     0.47786582 W
PL13W     0.47786582 W
SFO2      500.1320005 MHz
SI         32768
SF        125.7576758 MHz
WDW        EM
SSB         0
LB         3.00 Hz
GB         0
PC         1.40
  
```

liushouxin-xh-SR-4D-TBAF-MeOD

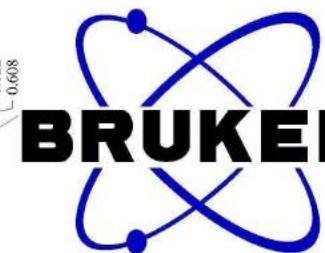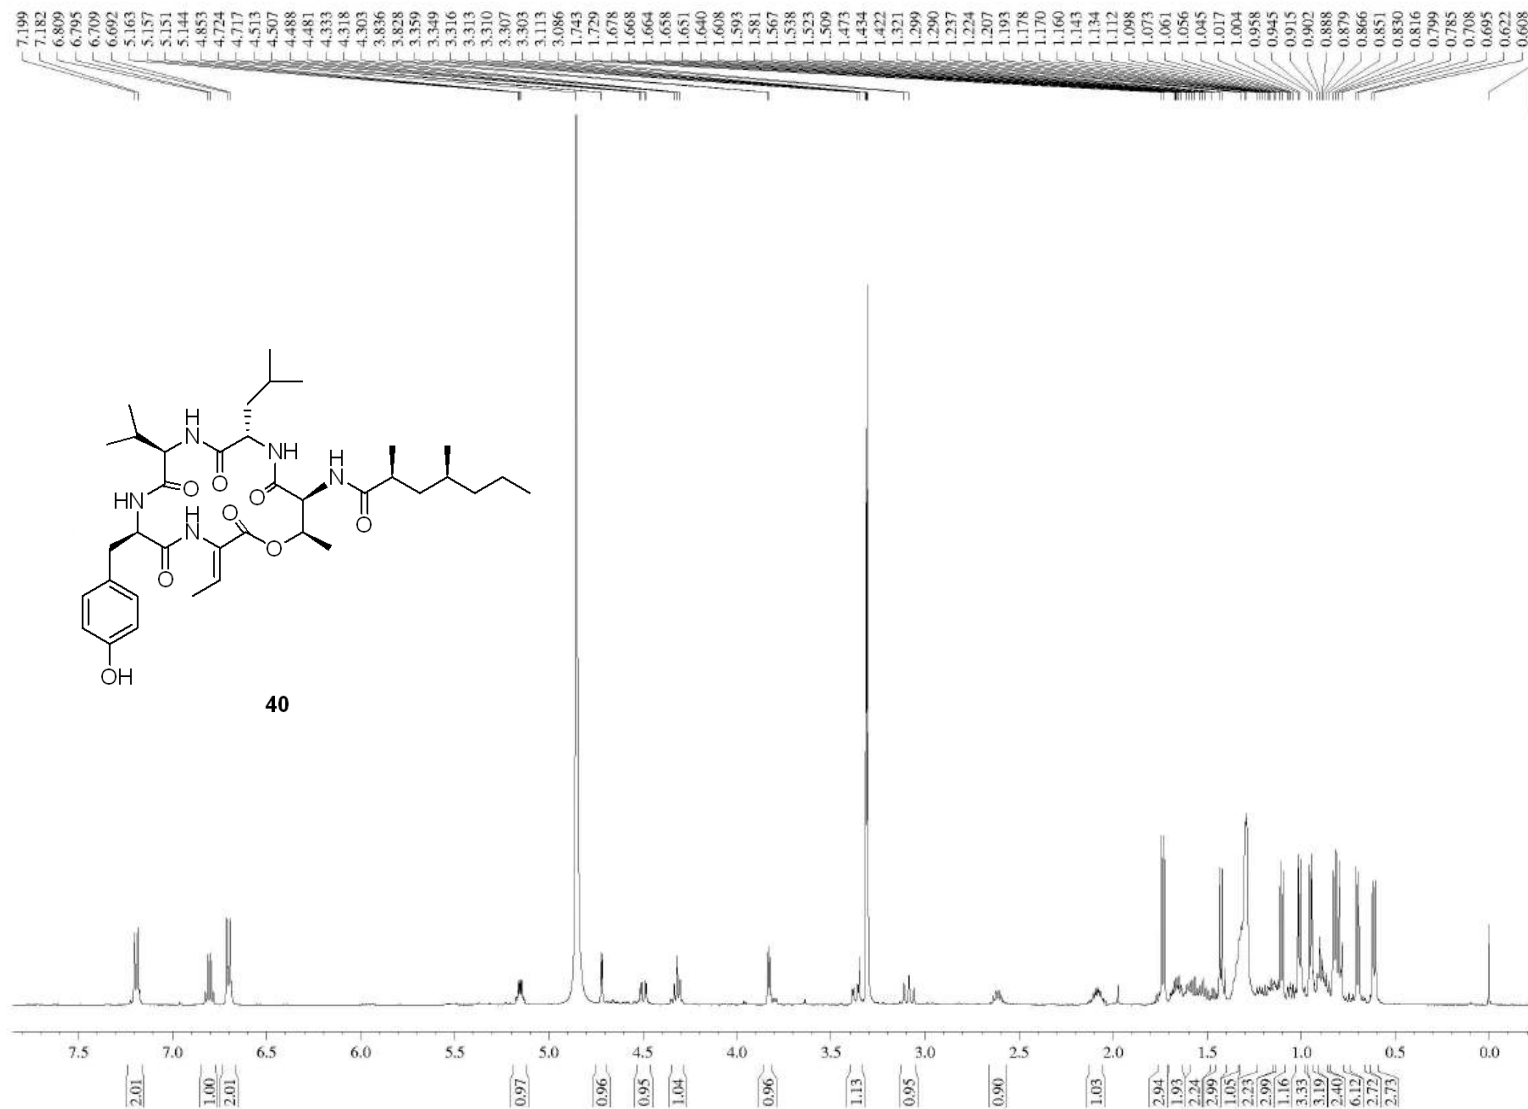

```

NAME          2021.06.2
EXPNO         13
PROCNO        1
Date_         20210602
Time          14.35
INSTRUM       spect
PROBHD        5 mm PADUL 13C
PULPROG       zg30
TD            65536
SOLVENT       MeOD
NS            128
DS            0
SWH           9014.423
FIDRES        0.137549
AQ            3.6351135
RG            322
DW            55.467
DE            6.50
TE            297.6
D1            1.00000000
TD0           1
  
```

```

===== CHANNEL f1 =====
NUC1          1H
P1            13.50
PL1           2.00
PL1W         16.79986763
SFO1         500.1340010
SI            32768
SF           500.1300160
WDW           EM
SSB           0
LB            0.30
GB            0
PC            1.00
  
```





## 8. References

- [1] P. M. T. Ferreira, L. S. Monteiro and G. Pereira, Synthesis and electrochemical behaviour of  $\beta$ -halodehydroamino acid derivatives. *Amino Acids*, 2010, **39**, 499-513.
- [2] X. Tian, L. Li, J. Han, X. Zhen and S. Liu, Stereoselectively synthesis and structural confirmation of dehydrodipeptides with dehydrobutyrine. *SpringerPlus*, 2016, **5**, 400-408.
- [3] H. Sai, T. Ogiku and H. Ohmizu, Stereoselective dyntheses of (E)- $\alpha$ ,  $\beta$ -Dehydroamino acids and (E)- $\alpha$ ,  $\beta$ -Dehydropeptides by stereospecific dehydration with 1-Ethyl-3-(3-dimethylaminopropyl) carbodiimide (EDC). *Synthesis*, 2003, **2**, 201-204.
- [4] Y. Q. Yang, M. C. Ji, Z. Lu, M. Jiang, W. W. Huang and X. Z. He, Facile access to  $\alpha$ ,  $\beta$ -Dehydroalanine and  $\alpha$ ,  $\beta$ -Dehydroamino butyric acid derivatives from DL-Serines and Threonines. *Synth. Commun.*, 2016, **46**, 977-982.
- [5] J. Sikorska, A. M. Hau, C. Anklin, S. Parker-Nance, M. T. Davies-Coleman, J. E. Ishmael and K. L. McPhail, Mandelalides A-D, Cytotoxic macrolides from a new *Lissoclinum* species of South African Tunicate. *J. Org. Chem.*, **2012**, *77*, 6066- 6075. Correction: *J. Org. Chem.*, 2013, **78**, 2812.
- [6] S. Kishimoto, Y. Tsunematsu, S. Nishimura, Y. Hayashi, A. Hattori and H. Kakeya, Tumescenamides C, an antimicrobial cyclic lipodepsipeptide from *Streptomyces* sp. *Tetrahedron.*, 2012, **68**, 5572-5578.
- [7] N. Takahashi, K. Kaneko and H. Kakeya, Total synthesis and antimicrobial activity of Tumescenamides C and its derivatives, *J. Org. Chem.*, 2020, **85**, 4530-4535.
